# Supplementary material
Source: MDPI journal article supplement (https://www.mdpi.com/2304-6740/5/2/36)
Supplement: s1 [file s1]

Archive with 4 entries (4 files):
- Calculated coordinates.xyz
- checkCIF.pdf
- ._checkCIF.pdf
- K[Be{1,3-(SiMeΓéâ)ΓééCΓéâHΓéâ}Γéâ].cif
