# Supplementary material
Source: MDPI journal article supplement (https://www.mdpi.com/2304-6740/5/2/36)
Supplement: s1 [file s1 › Calculated coordinates.xyz]

97
[Be(1,3-(SiMe3)2C3H3)3]- (S,S,S-Xray), APFD/6-311+G(2d)(Be); 6-31+G(d) (C,Si,H) �G = -2816.615434 au
Be	48.741838	-42.679716	10.655496
C	48.860388	-43.227093	8.963790
C	48.225221	-44.555692	8.946963
C	48.773962	-45.743291	8.583278
C	48.359194	-42.783095	5.959885
C	46.152066	-42.024954	7.921224
C	48.706805	-40.348352	7.760375
C	46.099874	-47.080143	9.261658
C	47.700434	-48.027446	6.813262
C	48.715466	-48.687672	9.595556
C	47.140628	-42.565069	11.429839
C	47.101084	-43.686408	12.383848
C	46.222722	-44.720940	12.427758
C	45.020833	-40.970366	12.990500
C	46.961310	-39.454724	11.194293
C	47.940201	-40.688455	13.818771
C	44.705182	-46.010391	14.781166
C	46.345445	-47.788115	12.947297
C	47.772777	-45.809135	14.838725
C	50.209314	-42.634005	11.665294
C	50.731037	-44.011083	11.640338
C	50.941247	-44.847760	12.688893
C	52.275728	-41.914429	9.411288
C	50.902072	-39.667628	10.971687
C	52.965333	-41.443520	12.342341
C	50.533352	-47.871151	13.314922
C	51.879959	-46.970178	10.685971
C	53.322114	-46.677148	13.385813
H	49.912725	-43.320480	8.649695
H	47.186148	-44.570471	9.292717
H	49.812101	-45.724323	8.232278
H	46.332050	-42.684142	10.690335
H	47.900484	-43.678045	13.132365
H	45.420532	-44.724196	11.680875
H	49.968646	-42.352363	12.703342
H	50.952787	-44.398189	10.640177
H	50.723607	-44.455655	13.689010
H	44.299556	-41.000233	12.163076
H	44.849992	-41.862933	13.605525
H	44.800866	-40.082886	13.599263
H	46.378781	-39.578960	10.273246
H	46.593950	-38.552237	11.701380
H	48.004100	-39.275356	10.912414
H	48.974967	-40.502474	13.513089
H	47.597935	-39.819818	14.397455
H	47.941101	-41.556320	14.489442
H	44.622306	-45.052880	15.310365
H	43.806189	-46.124630	14.161456
H	44.702405	-46.816032	15.527857
H	47.201548	-47.895454	12.273319
H	46.425563	-48.559465	13.724908
H	45.441254	-47.995455	12.360957
H	47.687460	-44.878206	15.413337
H	47.863487	-46.638790	15.551643
H	48.698388	-45.759829	14.255302
H	51.556292	-41.781391	8.596709
H	53.148144	-41.282151	9.197651
H	52.609190	-42.959196	9.394751
H	50.194358	-39.550260	10.144421
H	50.398099	-39.354752	11.894287
H	51.736240	-38.974756	10.796593
H	53.331396	-42.465535	12.502317
H	53.807072	-40.822652	12.006768
H	52.629191	-41.060475	13.314988
H	50.442031	-47.701553	14.395331
H	49.521400	-47.857512	12.897182
H	50.948743	-48.877003	13.167139
H	52.636180	-46.319557	10.228892
H	52.210021	-48.009745	10.562894
H	50.945958	-46.841949	10.128589
H	54.043512	-45.983095	12.936786
H	53.232076	-46.418429	14.448945
H	53.737367	-47.692069	13.321613
H	47.823191	-42.209818	5.191346
H	49.430990	-42.745060	5.724139
H	48.046146	-43.832488	5.890020
H	45.870876	-41.493939	8.836544
H	45.704116	-41.492772	7.071152
H	45.702152	-43.024352	7.963516
H	48.400945	-39.831329	8.675904
H	49.802471	-40.331601	7.712841
H	48.327614	-39.768064	6.908289
H	45.564959	-48.035076	9.343919
H	46.132959	-46.622474	10.256108
H	45.515340	-46.421035	8.607457
H	48.693614	-48.172859	6.368600
H	47.179937	-48.994601	6.794933
H	47.149364	-47.329895	6.170242
H	49.698173	-48.925125	9.168611
H	48.879107	-48.369290	10.630246
H	48.125030	-49.613498	9.613917
Si	48.033473	-42.119118	7.710549
Si	47.843256	-47.342980	8.581313
Si	46.802200	-40.964840	12.328189
Si	46.276073	-46.053524	13.711064
Si	51.533457	-41.450415	11.092648
Si	51.637414	-46.553610	12.513231
97
[Be(1,3-(SiMe3)2C3H3)3]- (S,S,S rotated), APFD/6-311+G(2d)(Be); 6-31+G(d) (C,Si,H) �G = -2816.619323 au
Be	-0.322002	0.557019	0.090771
C	0.710018	1.983042	0.373986
C	2.133274	1.787849	0.089271
C	3.182287	1.997428	0.926654
C	0.731085	5.016698	-0.275680
C	-1.898506	3.448290	-0.340302
C	0.243023	3.038528	-2.534644
C	5.886753	3.384932	0.376074
C	5.839464	0.730977	1.857855
C	5.143861	0.830208	-1.148867
C	0.001251	-0.420195	-1.376241
C	0.771700	-1.592615	-0.941202
C	2.088105	-1.857612	-1.140836
C	-2.183556	-2.586480	-1.864808
C	-2.833989	0.359903	-2.518502
C	-0.848437	-1.204265	-4.215409
C	4.338126	-2.807983	0.761283
C	1.748104	-4.420660	0.517630
C	3.773144	-4.360554	-1.806482
C	-1.518859	0.324870	1.398953
C	-2.875017	-0.052606	1.011612
C	-4.012470	0.685458	1.118174
C	-1.247555	-0.500698	4.367486
C	-1.301910	-2.660525	2.228389
C	1.163247	-0.803181	2.515631
C	-5.573642	-1.542249	-0.321058
C	-6.351472	1.397603	-0.765338
C	-6.937982	0.069672	1.916106
H	-2.493932	-2.580971	-0.814909
H	-3.062362	-2.847786	-2.468649
H	-1.443445	-3.387048	-1.990096
H	-3.260488	0.554026	-1.529218
H	-2.468165	1.314363	-2.916336
H	-3.642070	0.015298	-3.178602
H	-0.020416	-1.924631	-4.228218
H	-1.644967	-1.584598	-4.869281
H	-0.477491	-0.265737	-4.648110
H	5.097059	-2.195652	0.259375
H	3.920813	-2.211760	1.581283
H	4.844895	-3.680964	1.194454
H	0.918508	-4.757859	-0.115805
H	2.258113	-5.311624	0.906750
H	1.319047	-3.880532	1.369299
H	3.017183	-4.753985	-2.497384
H	4.470782	-3.748761	-2.393036
H	-0.850547	-1.235428	5.081195
H	-0.886688	0.490919	4.669870
H	-2.341862	-0.497070	4.451324
H	-1.125903	-2.964236	1.191168
H	-0.780156	-3.376705	2.876562
H	-2.377629	-2.754664	2.424849
H	1.554449	-1.031027	1.517806
H	1.519773	0.203629	2.763840
H	1.614957	-1.507525	3.228312
H	-6.566611	-1.863675	-0.661835
H	-4.908723	-1.521263	-1.191535
H	-5.193143	-2.304741	0.369629
H	-7.013543	1.034927	2.433454
H	-7.938968	-0.193412	1.548356
H	-6.637853	-0.679893	2.658868
H	-6.409827	2.404842	-0.332849
H	-5.694470	1.452785	-1.641561
H	-7.357747	1.119158	-1.106413
H	4.336038	-5.208847	-1.394486
H	-1.535205	1.301159	1.912473
H	-2.969381	-1.040244	0.549746
H	-3.917075	1.677177	1.574769
H	0.574808	2.319556	1.417561
H	2.359953	1.411421	-0.914438
H	2.944206	2.378007	1.927343
H	0.647372	0.212629	-2.006284
H	0.206879	-2.322086	-0.352363
H	2.654247	-1.129505	-1.730606
H	0.522702	5.297202	0.765031
H	1.821391	4.971501	-0.391549
H	0.347371	5.815316	-0.925082
H	-2.071633	3.727883	0.707134
H	-2.378561	4.206887	-0.973111
H	-2.413397	2.494994	-0.501310
H	-0.265285	2.138901	-2.895131
H	-0.129154	3.892347	-3.116658
H	1.312379	2.927011	-2.754342
H	5.466693	4.001524	-0.428415
H	5.797198	3.956037	1.309328
H	6.956324	3.238020	0.172863
H	5.393139	-0.263355	1.967594
H	6.907715	0.604344	1.636364
H	5.757553	1.241230	2.826656
H	4.686540	1.399743	-1.967434
H	6.203296	0.681745	-1.395583
H	4.660159	-0.151522	-1.115083
Si	-0.722661	-0.889507	2.583249
Si	-5.672142	0.158542	0.501921
Si	-0.042124	3.329780	-0.683192
Si	4.960343	1.728835	0.505449
Si	-1.453682	-0.930230	-2.434262
Si	2.962615	-3.326745	-0.435241
97
[Be(1,3-(SiMe3)2C3H3)3]- (R,R,S form), APFD/6-311+G(2d)(Be); 6-31+G(d) (C,Si,H) �G = -2816.623180 au
C	-1.844013	2.797429	0.290662
C	-1.149403	1.999601	-0.560800
C	0.289173	1.702248	-0.554719
C	-4.469677	1.859891	-1.001161
C	-4.404010	2.603537	1.988540
C	-4.174358	4.794208	-0.117676
C	0.473521	1.336492	-3.676796
C	3.000195	1.931151	-1.970332
C	0.881037	4.075092	-2.449977
C	3.821611	-0.832513	1.023205
C	2.659086	-0.137795	1.150345
C	1.291447	-0.656077	1.178556
C	5.420914	1.780538	1.325032
C	6.246212	-0.255708	-0.826568
C	6.694291	-0.903397	2.119693
C	0.839600	-1.220406	4.171804
C	-1.513855	-0.226368	2.496681
C	0.785545	1.670652	3.206794
C	-2.842962	-1.743612	-0.787578
C	-1.502031	-1.838272	-0.588942
C	-0.426450	-1.186981	-1.340975
C	-3.313407	-3.916528	1.342379
C	-5.407264	-3.426665	-0.855159
C	-5.054451	-1.392601	1.389245
C	2.527791	-1.761092	-2.289804
C	0.154758	-3.070719	-3.703909
C	0.940987	-3.959156	-0.894099
H	3.742993	-1.924844	0.971696
H	2.736164	0.954364	1.197727
H	1.297958	-1.757524	1.176317
H	4.788215	2.324536	0.614798
H	6.423185	2.227171	1.289922
H	5.012763	1.941577	2.330346
H	5.636518	0.269890	-1.570893
H	6.283270	-1.312807	-1.119493
H	7.268131	0.144460	-0.874556
H	7.709376	-0.492809	2.035574
H	6.752912	-1.982447	1.926151
H	6.355955	-0.771376	3.154922
H	0.358697	-0.900769	5.106338
H	1.926675	-1.205316	4.322328
H	0.545623	-2.260971	3.981418
H	-2.028185	0.135652	3.397670
H	-1.827313	-1.261364	2.324330
H	-1.859252	0.371530	1.646189
H	0.490462	2.389190	2.435395
H	1.859796	1.790105	3.394035
H	0.252536	1.935560	4.129779
H	-3.174392	-1.130778	-1.633037
H	-1.268127	3.323700	1.060431
H	-1.165146	-2.458028	0.249718
H	-0.853584	-0.626066	-2.186181
H	-2.762656	-4.644076	0.733699
H	-4.079362	-4.459882	1.911208
H	-2.609770	-3.486128	2.064668
H	-5.882195	-2.692956	-1.519528
H	-6.199663	-3.903875	-0.263292
H	-4.942227	-4.193318	-1.487304
H	-4.363118	-0.906329	2.086829
H	-5.821897	-1.916060	1.975777
H	-5.551599	-0.602191	0.813741
H	2.966618	-1.412148	-1.347378
H	2.545875	-0.924910	-2.998036
H	3.183141	-2.546105	-2.692539
H	0.800774	-3.856389	-4.118827
H	0.109437	-2.251691	-4.433640
H	-0.859184	-3.478120	-3.600981
H	-0.023700	-4.467505	-0.774446
H	1.308532	-3.693507	0.103492
H	1.648758	-4.677681	-1.328850
H	-1.725214	1.465859	-1.325600
H	0.793948	2.268581	0.245738
H	-4.194879	0.817981	-0.803934
H	-4.140752	2.107107	-2.018266
H	-5.564456	1.936920	-0.973769
H	-4.204753	1.561159	2.260291
H	-5.490296	2.762287	2.016626
H	-3.950922	3.240281	2.759677
H	-5.263519	4.931558	-0.080956
H	-3.827065	5.078748	-1.118743
H	-3.723716	5.492923	0.599139
H	0.704613	0.267510	-3.685512
H	0.908496	1.784488	-4.580500
H	-0.616703	1.439472	-3.747768
H	3.437760	2.697658	-1.317952
H	3.512293	1.990631	-2.939719
H	3.220184	0.955963	-1.524928
H	-0.187779	4.306466	-2.540431
H	1.384759	4.410289	-3.366911
H	1.272416	4.666768	-1.612158
Si	-3.681903	3.002502	0.281226
Si	1.135811	2.217939	-2.135029
Si	5.497559	-0.064037	0.906773
Si	0.357684	-0.106091	2.708756
Si	-4.114854	-2.587259	0.254565
Si	0.784523	-2.443328	-2.023649
Be	0.418342	-0.051567	-0.253366
98
K[Be(1,3-(SiMe3)2C3H3)3] (C3-Xray), APFD/6-311G(2d)(Be,K); 6-31G(d) (C,Si,H) �G = -3416.410766 au
Be	1.543903	0.000557	-0.001244
C	1.370809	-0.671447	-1.643950
C	0.100652	-0.183948	-2.175763
C	-1.000333	-0.901321	-2.538564
C	2.499603	-1.117749	-4.452095
C	2.730636	1.671145	-3.216342
C	4.458880	-0.631245	-2.155040
C	-2.399955	1.720338	-3.255634
C	-2.820561	-0.789385	-5.031740
C	-4.065736	-0.638499	-2.240667
C	1.370166	1.758899	0.238194
C	0.100633	1.975179	0.927557
C	-1.001161	2.647474	0.489028
C	2.494403	4.415254	1.258353
C	4.457462	2.188977	0.523900
C	2.733442	1.948011	3.051332
C	-2.816639	4.753074	1.834019
C	-4.066616	2.260405	0.573504
C	-2.396261	1.961243	3.121457
C	1.374410	-1.086510	1.402327
C	0.105861	-1.793986	1.247204
C	-0.995122	-1.750881	2.049972
C	2.742932	-3.613529	0.157351
C	4.463251	-1.539798	1.626368
C	2.508791	-3.294633	3.190786
C	-4.061216	-1.629892	1.679153
C	-2.393691	-3.682996	0.137921
C	-2.808706	-3.971650	3.199440
H	1.359715	-1.772015	-1.613345
H	0.028371	0.907407	-2.262696
H	-0.918687	-1.992373	-2.474192
H	1.357774	2.282348	-0.730413
H	0.029910	1.504766	1.916260
H	-0.920759	3.137585	-0.488010
H	1.362288	-0.509524	2.340058
H	0.034907	-2.416084	0.346209
H	-0.914565	-1.148351	2.961983
H	2.589391	4.824349	0.245102
H	1.489647	4.663947	1.620216
H	3.224336	4.927970	1.896460
H	4.498228	2.416532	-0.547072
H	5.214594	2.807363	1.021596
H	4.745990	1.142664	0.661113
H	2.941519	0.876926	3.133928
H	3.500535	2.481785	3.625607
H	1.768951	2.142026	3.535052
H	-1.969350	5.179586	2.382292
H	-2.918822	5.310855	0.895653
H	-3.725739	4.919334	2.424171
H	-4.240941	1.188783	0.733017
H	-4.970303	2.765476	0.936015
H	-4.006503	2.444541	-0.506234
H	-1.580694	2.346416	3.744157
H	-3.325538	2.046111	3.697428
H	-2.205713	0.892710	2.959855
H	2.945184	-3.148764	-0.812390
H	3.514591	-4.373734	0.329929
H	1.780863	-4.134473	0.087110
H	4.749480	-1.134398	0.651445
H	4.502742	-0.726238	2.359138
H	5.222731	-2.278096	1.911818
H	1.505140	-3.734724	3.227487
H	3.240877	-4.101924	3.314010
H	2.604202	-2.621509	4.051500
H	-3.998408	-0.786492	2.377827
H	-4.239436	-1.232594	0.671883
H	-4.964055	-2.195986	1.939038
H	-1.577799	-4.414599	0.156343
H	-3.323282	-4.224004	-0.075853
H	-2.205351	-3.006570	-0.705358
H	-1.962307	-4.661359	3.290626
H	-2.907604	-3.440360	4.153401
H	-3.719141	-4.564022	3.049087
H	3.229057	-0.820562	-5.215257
H	2.597526	-2.199284	-4.298052
H	1.494480	-0.932162	-4.849149
H	2.937075	2.280137	-2.331021
H	3.497459	1.902285	-3.965813
H	1.765588	1.990083	-3.627207
H	4.743289	0.012173	-1.317180
H	4.503116	-1.672216	-1.816205
H	5.216945	-0.506592	-2.938068
H	-3.330389	2.175791	-3.615316
H	-2.208958	2.113158	-2.248963
H	-1.585673	2.069307	-3.900915
H	-2.920381	-1.881128	-5.046654
H	-3.731688	-0.362861	-5.467975
H	-1.975494	-0.525204	-5.677097
H	-4.003213	-1.665301	-1.859692
H	-4.240459	0.035694	-1.392641
H	-4.970363	-0.579239	-2.858154
K	-1.909313	-0.003092	0.000984
Si	2.753384	-0.179718	-2.827192
Si	-2.535434	-0.164674	-3.275983
Si	2.752328	2.539581	1.254778
Si	-2.534226	2.919541	1.498249
Si	2.760405	-2.353086	1.567565
Si	-2.528542	-2.760502	1.782009
98
K[Be(1,3-(SiMe3)2C3H3)3] (S,S,R form), APFD/6-311G(2d)(Be); 6-31G(d) (C,Si,H) �G = -3416.408429 au
Be	1.195255	-0.818526	-0.015617
C	0.118261	-1.234325	-1.380038
C	-1.314272	-1.415273	-1.139897
C	-2.363234	-0.777752	-1.725448
C	2.178029	-3.610977	-1.002487
C	-0.451301	-4.098536	-2.483447
C	1.724558	-2.316022	-3.738108
C	-4.240998	-2.466773	0.005204
C	-5.201127	0.284672	-1.017318
C	-4.857369	-2.031822	-2.980554
C	2.689031	0.025460	-0.573978
C	2.161175	1.389742	-0.615336
C	1.742086	2.107556	-1.695268
C	5.505826	1.199772	-0.436467
C	5.130170	-1.717348	0.345325
C	4.111215	0.525062	2.187938
C	2.214693	5.075269	-2.465114
C	-0.610273	3.915269	-2.515849
C	0.812241	4.329979	0.188128
C	0.703071	-0.690033	1.693569
C	-0.577177	0.007092	1.823732
C	-0.795557	1.291437	2.216496
C	2.322759	-3.136866	2.744399
C	-0.598378	-3.526944	1.817224
C	0.012893	-2.008021	4.387213
C	-2.404052	3.426726	3.686690
C	-2.965295	2.963593	0.726845
C	-3.790471	0.810703	2.739924
H	0.284242	-0.496672	-2.187541
H	-1.559294	-2.151131	-0.370825
H	-2.130785	-0.087590	-2.550029
H	2.894430	-0.317420	-1.601043
H	2.040188	1.865330	0.367939
H	1.868921	1.638350	-2.677321
H	1.488959	-0.086147	2.170314
H	-1.458865	-0.572843	1.520364
H	0.085874	1.866880	2.521587
H	6.471305	1.236808	0.082674
H	5.695690	0.916812	-1.479078
H	5.085957	2.212862	-0.445953
H	6.147175	-1.638176	0.749192
H	4.595308	-2.459709	0.945119
H	5.214168	-2.101432	-0.678061
H	5.100966	0.701929	2.626672
H	3.542600	1.458086	2.281356
H	3.610797	-0.234688	2.796020
H	3.200511	5.078136	-1.987163
H	2.358573	4.817403	-3.520851
H	1.808336	6.092761	-2.419916
H	-1.467360	3.577628	-1.919059
H	-0.833997	4.951294	-2.798449
H	-0.591562	3.324832	-3.440687
H	1.773588	4.430732	0.705320
H	0.299164	5.297186	0.250678
H	0.217574	3.606559	0.760090
H	2.259576	-4.056947	3.338266
H	2.730486	-3.399680	1.764873
H	3.041623	-2.474990	3.240458
H	-0.620425	-4.472911	2.372015
H	-1.618708	-3.125581	1.823711
H	-0.334789	-3.756976	0.780039
H	-0.066175	-2.936478	4.965549
H	0.697189	-1.336207	4.919279
H	-0.973110	-1.528419	4.376969
H	-1.644516	4.181961	3.450754
H	-3.367021	3.940763	3.786735
H	-2.149071	2.991213	4.659314
H	-2.196761	3.667379	0.382704
H	-3.201780	2.262483	-0.083592
H	-3.877565	3.550821	0.889528
H	-3.600922	0.343294	3.712737
H	-4.789074	1.262636	2.767779
H	-3.810927	0.014350	1.988096
H	2.730348	-4.382058	-1.553947
H	2.907421	-2.877140	-0.646186
H	1.724935	-4.094472	-0.131429
H	-0.023351	-4.972322	-2.989389
H	-0.933539	-4.451121	-1.563904
H	-1.233745	-3.678223	-3.125605
H	2.202827	-3.178690	-4.217264
H	0.994610	-1.900328	-4.443088
H	2.496582	-1.556401	-3.568772
H	-5.284942	-2.729085	0.213325
H	-3.707290	-3.394141	-0.232542
H	-3.812360	-2.063565	0.929938
H	-6.266336	0.022918	-1.016578
H	-4.963109	0.698993	-0.032058
H	-5.060088	1.078902	-1.761179
H	-5.908422	-2.312463	-2.841438
H	-4.805770	-1.347885	-3.836228
H	-4.296113	-2.935770	-3.243441
K	-0.797611	1.352855	-0.645134
Si	0.883814	-2.810059	-2.119438
Si	-4.144247	-1.232873	-1.422403
Si	4.306467	-0.017003	0.384593
Si	1.072630	3.836322	-1.620371
Si	0.622396	-2.325636	2.623588
Si	-2.465888	2.096275	2.352815
65
[Be(1,3-(SiMe3)2C3H3)3]2 (C2), APFD/6-311G(2d)(Be); 6-31G(d) (C,Si,H)
Be	0.000000	0.000000	-0.282092
C	-0.769529	-1.486375	-0.285969
C	0.769529	1.486375	-0.285969
C	2.230332	1.192953	-0.289391
C	3.088007	1.273856	-1.326571
C	-2.230332	-1.192953	-0.289391
C	-3.088007	-1.273856	-1.326571
C	-1.716780	2.230992	1.338290
C	5.281818	-0.555221	-2.463630
C	5.257129	0.159097	0.533078
C	5.989697	2.294975	-1.568464
C	0.528210	4.322350	0.959051
C	0.996545	1.866045	2.759910
C	-5.989697	-2.294975	-1.568464
C	-5.257129	-0.159097	0.533078
C	-5.281818	0.555221	-2.463630
C	-0.528210	-4.322350	0.959051
C	-0.996545	-1.866045	2.759910
C	1.716780	-2.230992	1.338290
H	-0.467541	-2.005744	-1.212238
H	2.689756	1.629334	-2.282811
H	-2.689756	-1.629334	-2.282811
H	-1.602011	-4.474514	0.798651
H	0.467541	2.005744	-1.212238
H	2.220166	-2.394770	0.377561
H	-5.071909	-0.924490	1.295657
H	-6.343693	0.827506	-2.433607
H	-7.051469	-2.024041	-1.530858
H	5.785966	2.704955	-2.564676
H	4.644116	-0.716473	0.777173
H	5.051488	-0.228924	-3.484688
H	0.900457	0.779990	2.877624
H	-1.956568	1.211274	1.663945
H	0.000000	4.727112	0.087874
H	-4.644116	0.716473	0.777173
H	-5.785966	-2.704955	-2.564676
H	-4.695308	1.458320	-2.263061
H	-0.555025	-2.331805	3.648741
H	0.000000	-4.727112	0.087874
H	1.956568	-1.211274	1.663945
H	5.819500	3.094467	-0.838476
H	6.343693	-0.827506	-2.433607
H	6.309064	-0.138941	0.614311
H	2.066037	2.105933	2.757766
H	2.625486	0.837591	0.666449
H	0.229637	4.909881	1.835393
H	-2.160111	2.919303	2.067599
H	-0.229637	-4.909881	1.835393
H	2.160111	-2.919303	2.067599
H	-0.900457	-0.779990	2.877624
H	-2.220166	2.394770	0.377561
H	0.555025	2.331805	3.648741
H	1.602011	4.474514	0.798651
H	7.051469	2.024041	-1.530858
H	4.695308	-1.458320	-2.263061
H	5.071909	0.924490	1.295657
H	-5.051488	0.228924	-3.484688
H	-2.066037	-2.105933	2.757766
H	-5.819500	-3.094467	-0.838476
H	-6.309064	0.138941	0.614311
H	-2.625486	-0.837591	0.666449
Si	4.889690	0.801046	-1.205892
Si	-4.889690	-0.801046	-1.205892
Si	0.151383	2.488679	1.188771
Si	-0.151383	-2.488679	1.188771
80
[Be(1,3-(SiMe3)2C3H3)3]2�OEt2, APFD/6-311G(2d)(Be); 6-31+G(d) (C,Si,H) 
Be1	0.064033	-0.556961	0.876746
C2	0.851570	0.990795	1.039638
C3	2.031768	0.955810	0.151995
C4	3.343749	0.928087	0.486298
C5	-1.018502	-1.374633	-0.205739
C6	-2.229735	-0.600278	-0.525987
C7	-3.503517	-0.858369	-0.151369
C8	-1.901912	2.276541	1.611655
C9	0.619225	4.017049	1.444647
C10	-0.504690	2.810038	-1.112312
C11	3.991221	0.640707	-2.497429
C12	5.969734	2.110582	-0.636566
C13	5.612056	-0.931168	-0.410250
C14	0.150075	-0.488486	-2.966697
C15	1.715799	-2.423667	-1.111473
C16	-0.818204	-3.356866	-2.568253
C17	-4.336241	1.755617	-1.522627
C18	-5.731430	0.874832	1.073902
C19	-6.258124	-0.657268	-1.530435
C20	-1.597188	-1.160705	3.167613
C21	-0.507236	-2.183422	2.912701
C22	1.858054	-1.561163	2.653587
C23	2.496677	-2.933897	2.729743
H24	1.185201	1.090848	2.088631
H25	1.794242	0.894233	-0.913466
H26	3.594454	1.018164	1.549768
H27	-1.306514	-2.327042	0.273135
H28	-2.053733	0.314421	-1.097042
H29	-3.681908	-1.779475	0.415486
H30	3.446345	1.559955	-2.741833
H31	3.299947	-0.201074	-2.617588
H32	4.790816	0.522507	-3.238286
H33	6.391166	2.183470	0.373116
H34	5.500347	3.072864	-0.870552
H35	6.802226	1.961287	-1.334748
H36	6.021525	-0.954622	0.606961
H37	6.445255	-1.084590	-1.106801
H38	4.924714	-1.779064	-0.515026
H39	-0.837723	-0.211220	-3.353847
H40	0.759671	-0.810938	-3.819410
H41	0.610117	0.414363	-2.555085
H42	2.352370	-2.733167	-1.949298
H43	1.625463	-3.280314	-0.432235
H44	2.239423	-1.619821	-0.579459
H45	-1.844533	-3.103244	-2.858536
H46	-0.867886	-4.227387	-1.903191
H47	-0.273109	-3.655411	-3.471868
H48	-3.868504	1.453447	-2.466893
H49	-3.603293	2.341812	-0.957232
H50	-5.176139	2.417213	-1.765761
H51	-5.013825	1.457628	1.662901
H52	-6.071152	0.036458	1.693951
H53	-6.600817	1.512534	0.872481
H54	-5.857013	-0.993392	-2.493401
H55	-7.125657	-0.016479	-1.729883
H56	-6.615589	-1.543175	-0.992064
H57	-2.356995	-1.587085	3.832613
H58	-2.098350	-0.865357	2.238745
H59	-1.186695	-0.265230	3.646026
H60	-0.037808	-2.507412	3.846449
H61	-0.888220	-3.067510	2.394617
H62	1.786776	-1.077066	3.635741
H63	2.422385	-0.907946	1.986166
H64	3.506739	-2.838718	3.143109
H65	2.576918	-3.373854	1.731718
H66	1.937256	-3.622823	3.371890
H67	-1.755220	2.150057	2.691723
H68	-2.444274	1.401604	1.238145
H69	-2.541000	3.156697	1.469460
H70	0.730766	3.937330	2.532808
H71	0.062428	4.937703	1.232243
H72	1.622978	4.120092	1.015491
H73	-0.975283	1.973348	-1.635679
H74	0.453051	3.016744	-1.605006
H75	-1.143733	3.689826	-1.255125
O76	0.533177	-1.615468	2.081778
Si77	-0.243338	2.490617	0.731690
Si78	4.714686	0.701616	-0.752896
Si79	-0.001677	-1.885508	-1.705567
Si80	-4.939532	0.262531	-0.533308
