# Supplementary material
Source: MDPI journal article supplement (https://www.mdpi.com/2304-6740/5/2/36)
Supplement: s1 [file s1 › K[Be{1,3-(SiMeΓéâ)ΓééCΓéâHΓéâ}Γéâ].cif]

_publ_section_references
;
Bruker (2014). APEX2 & SAINT, Bruker AXS, Inc., Madison, WI, USA.

Burla, M. C., Caliandro, R., Camalli, M., Carrozzini, B., Cascarano, G. L.,
Giacovazzo, C., Mallamo, M., Mazzone, A., Polidori, G., Spagna, R. (2012).
SIR2011, J. Appl. Cryst. 45, 357-361.

Sheldrick, G. M. (2008). Acta Cryst. A64, 112-122.

Sheldrick, G. M. (2014). SADABS, University of G\"ottingen, Germany.

Sheldrick, G. M. (2015). SHELXL-2014, Acta Cryst. C71, 3-8.
;
 
data_hannr05 
  
_vrf_PLAT049_hannr05 
; 
PROBLEM: _B Calculated Density less than 1.0 gcm-3 ......... 0.9912 
RESPONSE: This is correct. 
; 
  
_audit_creation_method            'SHELXL-2014/7' 
_shelx_SHELXL_version_number      '2014/7' 
_chemical_name_systematic         ? 
_chemical_name_common             hannr05 
_chemical_melting_point           ? 
_chemical_formula_moiety          'C27 H63 Be K Si6' 
_chemical_formula_sum             'C27 H63 Be K Si6' 
_chemical_formula_weight          604.42 
  
loop_ 
 _atom_type_symbol 
 _atom_type_description 
 _atom_type_scat_dispersion_real 
 _atom_type_scat_dispersion_imag 
 _atom_type_scat_source 
 'C'  'C'   0.0033   0.0016 
 'International Tables Vol C Tables 4.2.6.8 and 6.1.1.4' 
 'H'  'H'   0.0000   0.0000 
 'International Tables Vol C Tables 4.2.6.8 and 6.1.1.4' 
 'Be'  'Be'   0.0005   0.0002 
 'International Tables Vol C Tables 4.2.6.8 and 6.1.1.4' 
 'Si'  'Si'   0.0817   0.0704 
 'International Tables Vol C Tables 4.2.6.8 and 6.1.1.4' 
 'K'  'K'   0.2009   0.2494 
 'International Tables Vol C Tables 4.2.6.8 and 6.1.1.4' 
  
_space_group_crystal_system       triclinic 
_space_group_IT_number            2 
_space_group_name_H-M_alt         'P -1' 
_space_group_name_Hall            '-P 1' 
  
_shelx_space_group_comment 
; 
The symmetry employed for this shelxl refinement is uniquely defined 
by the following loop, which should always be used as a source of 
symmetry information in preference to the above space-group names. 
They are only intended as comments. 
; 
  
loop_ 
 _space_group_symop_operation_xyz 
 'x, y, z' 
 '-x, -y, -z' 
  
_cell_length_a                    11.936(3) 
_cell_length_b                    13.097(3) 
_cell_length_c                    13.758(3) 
_cell_angle_alpha                 80.165(5) 
_cell_angle_beta                  73.087(5) 
_cell_angle_gamma                 89.739(5) 
_cell_volume                      2025.3(9) 
_cell_formula_units_Z             2 
_cell_measurement_temperature     100.0(5) 
_cell_measurement_reflns_used     2886 
_cell_measurement_theta_min       2.33 
_cell_measurement_theta_max       25.03 
  
_exptl_crystal_description        plate 
_exptl_crystal_colour             colorless 
_exptl_crystal_density_meas       ? 
_exptl_crystal_density_method     ? 
_exptl_crystal_density_diffrn     0.991 
_exptl_crystal_F_000              664 
_exptl_transmission_factor_min    ? 
_exptl_transmission_factor_max    ? 
_exptl_crystal_size_max           0.20 
_exptl_crystal_size_mid           0.20 
_exptl_crystal_size_min           0.08 
_exptl_absorpt_coefficient_mu     0.322 
_shelx_estimated_absorpt_T_min    0.938 
_shelx_estimated_absorpt_T_max    0.975 
_exptl_absorpt_correction_type    multi-scan 
_exptl_absorpt_correction_T_min   0.6317 
_exptl_absorpt_correction_T_max   0.7453 
_exptl_absorpt_process_details    'SADABS (Sheldrick, 2014)' 
_exptl_absorpt_special_details    ? 
_diffrn_ambient_temperature       100.0(5) 
_diffrn_radiation_wavelength      0.71073 
_diffrn_radiation_type            MoK\a 
_diffrn_source                    'fine-focus sealed tube' 
_diffrn_measurement_device_type   'Bruker SMART APEX II CCD platform' 
_diffrn_measurement_method        '\w scans' 
_diffrn_detector_area_resol_mean  ? 
_diffrn_reflns_number             23415 
_diffrn_reflns_av_unetI/netI      0.1279 
_diffrn_reflns_av_R_equivalents   0.1195 
_diffrn_reflns_limit_h_min        -14 
_diffrn_reflns_limit_h_max        14 
_diffrn_reflns_limit_k_min        -15 
_diffrn_reflns_limit_k_max        15 
_diffrn_reflns_limit_l_min        -16 
_diffrn_reflns_limit_l_max        16 
_diffrn_reflns_theta_min          2.001 
_diffrn_reflns_theta_max          25.741 
_diffrn_reflns_theta_full         25.741 
_diffrn_measured_fraction_theta_max   0.997 
_diffrn_measured_fraction_theta_full  0.997 
_diffrn_reflns_Laue_measured_fraction_max    0.997 
_diffrn_reflns_Laue_measured_fraction_full   0.997 
_diffrn_reflns_point_group_measured_fraction_max   0.997 
_diffrn_reflns_point_group_measured_fraction_full  0.997 
_reflns_number_total              7725 
_reflns_number_gt                 4292 
_reflns_threshold_expression      'I > 2\s(I)' 
_reflns_Friedel_coverage          0.000 
_reflns_Friedel_fraction_max      . 
_reflns_Friedel_fraction_full     . 
  
_reflns_special_details 
; 
 Reflections were merged by SHELXL according to the crystal 
 class for the calculation of statistics and refinement. 
  
 _reflns_Friedel_fraction is defined as the number of unique 
 Friedel pairs measured divided by the number that would be 
 possible theoretically, ignoring centric projections and 
 systematic absences. 
; 
  
_computing_data_collection        'APEX2 (Bruker, 2014)' 
_computing_cell_refinement        'SAINT (Bruker, 2014)' 
_computing_data_reduction         'SAINT (Bruker, 2014)' 
_computing_structure_solution     'SIR2011 (Burla et al., 2012)' 
_computing_structure_refinement   'SHELXL-2014/7 (Sheldrick, 2015)' 
_computing_molecular_graphics     'SHELXTL (Sheldrick, 2008)' 
_computing_publication_material   'SHELXTL (Sheldrick, 2008)' 
_refine_special_details 
; 
The allylic hydrogen atoms were found from the difference Fourier 
map and refined freely. 
; 
_refine_ls_structure_factor_coef  Fsqd 
_refine_ls_matrix_type            full 
_refine_ls_weighting_scheme       calc 
_refine_ls_weighting_details 
'w=1/[\s^2^(Fo^2^)+(0.0550P)^2^] where P=(Fo^2^+2Fc^2^)/3' 
_atom_sites_solution_primary      direct 
_atom_sites_solution_secondary    difmap 
_atom_sites_solution_hydrogens    mixed 
_refine_ls_hydrogen_treatment     mixed 
_refine_ls_extinction_method      none 
_refine_ls_extinction_coef        . 
_refine_ls_number_reflns          7725 
_refine_ls_number_parameters      370 
_refine_ls_number_restraints      0 
_refine_ls_R_factor_all           0.1280 
_refine_ls_R_factor_gt            0.0588 
_refine_ls_wR_factor_ref          0.1326 
_refine_ls_wR_factor_gt           0.1071 
_refine_ls_goodness_of_fit_ref    0.965 
_refine_ls_restrained_S_all       0.965 
_refine_ls_shift/su_max           0.000 
_refine_ls_shift/su_mean          0.000 
  
loop_ 
 _atom_site_label 
 _atom_site_type_symbol 
 _atom_site_fract_x 
 _atom_site_fract_y 
 _atom_site_fract_z 
 _atom_site_U_iso_or_equiv 
 _atom_site_adp_type 
 _atom_site_occupancy 
 _atom_site_site_symmetry_order 
 _atom_site_calc_flag 
 _atom_site_refinement_flags_posn 
 _atom_site_refinement_flags_adp 
 _atom_site_refinement_flags_occupancy 
 _atom_site_disorder_assembly 
 _atom_site_disorder_group 
K1 K 0.56958(8) 0.30145(7) 0.23470(7) 0.0320(2) Uani 1 1 d . . . . . 
Be1 Be 0.8409(4) 0.2907(4) 0.2988(4) 0.0232(11) Uani 1 1 d . . . . . 
Si1 Si 0.81182(9) 0.18150(9) 0.52540(8) 0.0273(3) Uani 1 1 d . . . . . 
Si2 Si 0.38752(9) 0.22222(9) 0.48945(9) 0.0274(3) Uani 1 1 d . . . . . 
Si3 Si 0.97029(10) 0.50760(9) 0.27317(9) 0.0284(3) Uani 1 1 d . . . . . 
Si4 Si 0.57643(10) 0.57606(9) 0.17436(9) 0.0286(3) Uani 1 1 d . . . . . 
Si5 Si 1.02568(9) 0.16907(9) 0.15546(9) 0.0310(3) Uani 1 1 d . . . . . 
Si6 Si 0.64557(10) 0.12939(9) 0.04945(9) 0.0298(3) Uani 1 1 d . . . . . 
C1 C 0.7597(3) 0.1978(3) 0.4081(3) 0.0217(9) Uani 1 1 d . . . . . 
H1 H 0.762(3) 0.132(2) 0.387(2) 0.013(9) Uiso 1 1 d . . . . . 
C2 C 0.6369(3) 0.2277(3) 0.4389(3) 0.0231(9) Uani 1 1 d . . . . . 
H2 H 0.624(3) 0.292(3) 0.459(2) 0.016(9) Uiso 1 1 d . . . . . 
C3 C 0.5374(3) 0.1775(3) 0.4411(3) 0.0283(10) Uani 1 1 d . . . . . 
H3 H 0.548(3) 0.114(3) 0.426(3) 0.022(10) Uiso 1 1 d . . . . . 
C4 C 0.7347(4) 0.0646(4) 0.6189(3) 0.0485(13) Uani 1 1 d . . . . . 
H4A H 0.7541 0.0610 0.6839 0.073 Uiso 1 1 calc R U . . . 
H4B H 0.7598 0.0020 0.5899 0.073 Uiso 1 1 calc R U . . . 
H4C H 0.6498 0.0695 0.6319 0.073 Uiso 1 1 calc R U . . . 
C5 C 0.7808(4) 0.2969(3) 0.5913(3) 0.0400(11) Uani 1 1 d . . . . . 
H5A H 0.8182 0.3594 0.5427 0.060 Uiso 1 1 calc R U . . . 
H5B H 0.8120 0.2871 0.6505 0.060 Uiso 1 1 calc R U . . . 
H5C H 0.6959 0.3044 0.6151 0.060 Uiso 1 1 calc R U . . . 
C6 C 0.9721(3) 0.1606(3) 0.4946(3) 0.0395(11) Uani 1 1 d . . . . . 
H6A H 1.0160 0.2233 0.4513 0.059 Uiso 1 1 calc R U . . . 
H6B H 0.9905 0.1022 0.4576 0.059 Uiso 1 1 calc R U . . . 
H6C H 0.9939 0.1453 0.5588 0.059 Uiso 1 1 calc R U . . . 
C7 C 0.3957(4) 0.3537(3) 0.5220(3) 0.0372(11) Uani 1 1 d . . . . . 
H7A H 0.3163 0.3765 0.5500 0.056 Uiso 1 1 calc R U . . . 
H7B H 0.4372 0.4027 0.4596 0.056 Uiso 1 1 calc R U . . . 
H7C H 0.4381 0.3513 0.5736 0.056 Uiso 1 1 calc R U . . . 
C8 C 0.3000(4) 0.1299(3) 0.6024(3) 0.0413(11) Uani 1 1 d . . . . . 
H8A H 0.2988 0.0609 0.5840 0.062 Uiso 1 1 calc R U . . . 
H8B H 0.2197 0.1528 0.6243 0.062 Uiso 1 1 calc R U . . . 
H8C H 0.3350 0.1267 0.6590 0.062 Uiso 1 1 calc R U . . . 
C9 C 0.3101(3) 0.2332(3) 0.3876(3) 0.0393(11) Uani 1 1 d . . . . . 
H9A H 0.3320 0.1766 0.3484 0.059 Uiso 1 1 calc R U . . . 
H9B H 0.3328 0.2999 0.3407 0.059 Uiso 1 1 calc R U . . . 
H9C H 0.2252 0.2288 0.4204 0.059 Uiso 1 1 calc R U . . . 
C10 C 0.8314(3) 0.4276(3) 0.3048(3) 0.0252(9) Uani 1 1 d . . . . . 
H10 H 0.789(3) 0.434(3) 0.376(3) 0.026(10) Uiso 1 1 d . . . . . 
C11 C 0.7609(3) 0.4713(3) 0.2371(3) 0.0243(9) Uani 1 1 d . . . . . 
H11 H 0.802(3) 0.479(3) 0.163(3) 0.030(11) Uiso 1 1 d . . . . . 
C12 C 0.6500(3) 0.5031(3) 0.2636(3) 0.0252(9) Uani 1 1 d . . . . . 
H12 H 0.611(3) 0.500(2) 0.334(3) 0.014(9) Uiso 1 1 d . . . . . 
C13 C 0.9386(4) 0.6417(3) 0.3006(4) 0.0429(12) Uani 1 1 d . . . . . 
H13A H 0.9049 0.6386 0.3752 0.064 Uiso 1 1 calc R U . . . 
H13B H 0.8829 0.6719 0.2650 0.064 Uiso 1 1 calc R U . . . 
H13C H 1.0116 0.6849 0.2762 0.064 Uiso 1 1 calc R U . . . 
C14 C 1.0678(3) 0.4512(3) 0.3512(3) 0.0378(11) Uani 1 1 d . . . . . 
H14A H 1.0238 0.4395 0.4247 0.057 Uiso 1 1 calc R U . . . 
H14B H 1.1351 0.4995 0.3385 0.057 Uiso 1 1 calc R U . . . 
H14C H 1.0956 0.3851 0.3312 0.057 Uiso 1 1 calc R U . . . 
C15 C 1.0526(3) 0.5222(3) 0.1332(3) 0.0399(11) Uani 1 1 d . . . . . 
H15A H 1.0641 0.4535 0.1137 0.060 Uiso 1 1 calc R U . . . 
H15B H 1.1290 0.5576 0.1203 0.060 Uiso 1 1 calc R U . . . 
H15C H 1.0079 0.5631 0.0922 0.060 Uiso 1 1 calc R U . . . 
C16 C 0.5731(4) 0.7161(3) 0.1863(4) 0.0470(12) Uani 1 1 d . . . . . 
H16A H 0.6535 0.7453 0.1678 0.071 Uiso 1 1 calc R U . . . 
H16B H 0.5317 0.7227 0.2576 0.071 Uiso 1 1 calc R U . . . 
H16C H 0.5324 0.7537 0.1398 0.071 Uiso 1 1 calc R U . . . 
C17 C 0.4203(4) 0.5278(3) 0.2053(3) 0.0422(12) Uani 1 1 d . . . . . 
H17A H 0.4182 0.4589 0.1869 0.063 Uiso 1 1 calc R U . . . 
H17B H 0.3795 0.5759 0.1660 0.063 Uiso 1 1 calc R U . . . 
H17C H 0.3815 0.5233 0.2794 0.063 Uiso 1 1 calc R U . . . 
C18 C 0.6550(4) 0.5609(4) 0.0396(3) 0.0489(13) Uani 1 1 d . . . . . 
H18A H 0.7360 0.5887 0.0211 0.073 Uiso 1 1 calc R U . . . 
H18B H 0.6153 0.5988 -0.0077 0.073 Uiso 1 1 calc R U . . . 
H18C H 0.6550 0.4872 0.0344 0.073 Uiso 1 1 calc R U . . . 
C19 C 0.8948(3) 0.2507(3) 0.1744(3) 0.0260(9) Uani 1 1 d . . . . . 
H19 H 0.917(3) 0.311(3) 0.127(3) 0.035(12) Uiso 1 1 d . . . . . 
C20 C 0.8020(3) 0.1925(3) 0.1524(3) 0.0243(9) Uani 1 1 d . . . . . 
H20 H 0.774(3) 0.121(3) 0.198(3) 0.029(10) Uiso 1 1 d . . . . . 
C21 C 0.7487(3) 0.2159(3) 0.0772(3) 0.0277(9) Uani 1 1 d . . . . . 
H21 H 0.772(3) 0.280(3) 0.035(3) 0.043(13) Uiso 1 1 d . . . . . 
C22 C 0.9871(4) 0.0347(3) 0.2311(3) 0.0426(12) Uani 1 1 d . . . . . 
H22A H 0.9455 0.0382 0.3032 0.064 Uiso 1 1 calc R U . . . 
H22B H 1.0589 -0.0028 0.2279 0.064 Uiso 1 1 calc R U . . . 
H22C H 0.9366 -0.0016 0.2019 0.064 Uiso 1 1 calc R U . . . 
C23 C 1.1471(3) 0.2246(3) 0.1939(3) 0.0413(11) Uani 1 1 d . . . . . 
H23A H 1.1250 0.2173 0.2693 0.062 Uiso 1 1 calc R U . . . 
H23B H 1.1615 0.2982 0.1628 0.062 Uiso 1 1 calc R U . . . 
H23C H 1.2185 0.1873 0.1699 0.062 Uiso 1 1 calc R U . . . 
C24 C 1.0852(4) 0.1590(4) 0.0154(3) 0.0514(13) Uani 1 1 d . . . . . 
H24A H 1.0234 0.1309 -0.0077 0.077 Uiso 1 1 calc R U . . . 
H24B H 1.1509 0.1129 0.0063 0.077 Uiso 1 1 calc R U . . . 
H24C H 1.1124 0.2280 -0.0254 0.077 Uiso 1 1 calc R U . . . 
C25 C 0.4955(3) 0.1826(4) 0.0731(3) 0.0451(12) Uani 1 1 d . . . . . 
H25A H 0.5024 0.2568 0.0439 0.068 Uiso 1 1 calc R U . . . 
H25B H 0.4565 0.1727 0.1476 0.068 Uiso 1 1 calc R U . . . 
H25C H 0.4492 0.1460 0.0403 0.068 Uiso 1 1 calc R U . . . 
C26 C 0.6284(4) 0.0017(3) 0.1367(4) 0.0503(13) Uani 1 1 d . . . . . 
H26A H 0.7053 -0.0283 0.1285 0.075 Uiso 1 1 calc R U . . . 
H26B H 0.5764 -0.0450 0.1191 0.075 Uiso 1 1 calc R U . . . 
H26C H 0.5947 0.0111 0.2084 0.075 Uiso 1 1 calc R U . . . 
C27 C 0.6982(4) 0.1153(4) -0.0879(3) 0.0548(14) Uani 1 1 d . . . . . 
H27A H 0.7747 0.0839 -0.1016 0.082 Uiso 1 1 calc R U . . . 
H27B H 0.7058 0.1837 -0.1319 0.082 Uiso 1 1 calc R U . . . 
H27C H 0.6420 0.0708 -0.1031 0.082 Uiso 1 1 calc R U . . . 
  
loop_ 
 _atom_site_aniso_label 
 _atom_site_aniso_U_11 
 _atom_site_aniso_U_22 
 _atom_site_aniso_U_33 
 _atom_site_aniso_U_23 
 _atom_site_aniso_U_13 
 _atom_site_aniso_U_12 
K1 0.0326(5) 0.0345(5) 0.0315(5) -0.0105(4) -0.0106(4) 0.0032(4) 
Be1 0.013(3) 0.028(3) 0.030(3) -0.002(2) -0.010(2) -0.002(2) 
Si1 0.0229(6) 0.0348(7) 0.0259(6) -0.0020(5) -0.0114(5) -0.0016(5) 
Si2 0.0192(6) 0.0295(6) 0.0343(7) -0.0032(5) -0.0102(5) -0.0014(5) 
Si3 0.0203(6) 0.0295(6) 0.0367(7) -0.0060(5) -0.0103(5) -0.0004(5) 
Si4 0.0259(6) 0.0315(7) 0.0297(6) -0.0034(5) -0.0113(5) 0.0055(5) 
Si5 0.0198(6) 0.0431(7) 0.0305(7) -0.0087(6) -0.0069(5) 0.0046(5) 
Si6 0.0296(7) 0.0372(7) 0.0288(6) -0.0090(6) -0.0164(5) 0.0066(5) 
C1 0.020(2) 0.022(2) 0.025(2) -0.0088(18) -0.0068(17) 0.0040(17) 
C2 0.025(2) 0.024(2) 0.021(2) -0.0007(18) -0.0087(17) 0.0016(18) 
C3 0.027(2) 0.024(2) 0.038(3) -0.010(2) -0.0147(19) 0.0059(19) 
C4 0.049(3) 0.060(3) 0.036(3) 0.005(2) -0.019(2) -0.011(2) 
C5 0.033(3) 0.059(3) 0.037(3) -0.016(2) -0.020(2) 0.002(2) 
C6 0.026(2) 0.049(3) 0.045(3) -0.001(2) -0.016(2) 0.006(2) 
C7 0.029(2) 0.039(3) 0.041(3) -0.006(2) -0.006(2) 0.002(2) 
C8 0.032(3) 0.048(3) 0.042(3) -0.002(2) -0.011(2) 0.000(2) 
C9 0.022(2) 0.049(3) 0.047(3) -0.001(2) -0.016(2) -0.002(2) 
C10 0.023(2) 0.026(2) 0.027(2) -0.0052(19) -0.0077(18) 0.0008(17) 
C11 0.023(2) 0.024(2) 0.024(2) -0.0043(19) -0.0049(18) -0.0012(17) 
C12 0.024(2) 0.030(2) 0.019(2) 0.0007(19) -0.0046(18) -0.0017(18) 
C13 0.035(3) 0.032(2) 0.066(3) -0.012(2) -0.020(2) -0.004(2) 
C14 0.026(2) 0.042(3) 0.048(3) -0.006(2) -0.017(2) -0.003(2) 
C15 0.026(2) 0.044(3) 0.044(3) 0.000(2) -0.006(2) -0.007(2) 
C16 0.052(3) 0.037(3) 0.054(3) 0.001(2) -0.025(3) 0.006(2) 
C17 0.035(3) 0.045(3) 0.050(3) -0.004(2) -0.023(2) 0.008(2) 
C18 0.055(3) 0.059(3) 0.030(3) -0.005(2) -0.010(2) 0.025(3) 
C19 0.020(2) 0.031(2) 0.024(2) -0.002(2) -0.0040(18) -0.0040(18) 
C20 0.021(2) 0.028(2) 0.024(2) -0.0057(19) -0.0065(18) 0.0049(18) 
C21 0.027(2) 0.030(2) 0.026(2) -0.002(2) -0.0086(19) 0.0020(19) 
C22 0.033(3) 0.043(3) 0.053(3) -0.014(2) -0.013(2) 0.014(2) 
C23 0.023(2) 0.055(3) 0.046(3) -0.006(2) -0.012(2) 0.004(2) 
C24 0.037(3) 0.076(4) 0.040(3) -0.018(3) -0.005(2) 0.014(3) 
C25 0.034(3) 0.059(3) 0.053(3) -0.022(3) -0.023(2) 0.011(2) 
C26 0.055(3) 0.038(3) 0.071(4) -0.010(3) -0.039(3) 0.001(2) 
C27 0.045(3) 0.086(4) 0.042(3) -0.025(3) -0.018(2) 0.003(3) 
  
_geom_special_details 
; 
 All esds (except the esd in the dihedral angle between two l.s. planes) 
 are estimated using the full covariance matrix.  The cell esds are taken 
 into account individually in the estimation of esds in distances, angles 
 and torsion angles; correlations between esds in cell parameters are only 
 used when they are defined by crystal symmetry.  An approximate (isotropic) 
 treatment of cell esds is used for estimating esds involving l.s. planes. 
; 
  
loop_ 
 _geom_bond_atom_site_label_1 
 _geom_bond_atom_site_label_2 
 _geom_bond_distance 
 _geom_bond_site_symmetry_2 
 _geom_bond_publ_flag 
K1 C21 2.938(4) . ? 
K1 C3 2.940(4) . ? 
K1 C12 2.943(4) . ? 
K1 C20 3.114(4) . ? 
K1 C2 3.138(4) . ? 
K1 C11 3.206(4) . ? 
K1 C9 3.226(4) . ? 
K1 C25 3.238(4) . ? 
K1 C17 3.477(4) . ? 
K1 Si2 3.5256(16) . ? 
K1 Si4 3.5460(17) . ? 
K1 Be1 3.592(5) . ? 
Be1 C1 1.795(6) . ? 
Be1 C10 1.810(6) . ? 
Be1 C19 1.811(6) . ? 
Si1 C6 1.864(4) . ? 
Si1 C1 1.871(4) . ? 
Si1 C4 1.870(4) . ? 
Si1 C5 1.873(4) . ? 
Si2 C8 1.842(4) . ? 
Si2 C3 1.848(4) . ? 
Si2 C7 1.862(4) . ? 
Si2 C9 1.877(4) . ? 
Si3 C10 1.865(4) . ? 
Si3 C15 1.867(4) . ? 
Si3 C14 1.871(4) . ? 
Si3 C13 1.874(4) . ? 
Si4 C12 1.847(4) . ? 
Si4 C18 1.863(4) . ? 
Si4 C16 1.868(4) . ? 
Si4 C17 1.874(4) . ? 
Si5 C19 1.870(4) . ? 
Si5 C23 1.870(4) . ? 
Si5 C22 1.869(4) . ? 
Si5 C24 1.877(4) . ? 
Si6 C21 1.838(4) . ? 
Si6 C27 1.852(4) . ? 
Si6 C26 1.858(4) . ? 
Si6 C25 1.878(4) . ? 
C1 C2 1.474(5) . ? 
C1 H1 0.95(3) . ? 
C2 C3 1.351(5) . ? 
C2 H2 0.92(3) . ? 
C3 H3 0.89(3) . ? 
C4 H4A 0.9800 . ? 
C4 H4B 0.9800 . ? 
C4 H4C 0.9800 . ? 
C5 H5A 0.9800 . ? 
C5 H5B 0.9800 . ? 
C5 H5C 0.9800 . ? 
C6 H6A 0.9800 . ? 
C6 H6B 0.9800 . ? 
C6 H6C 0.9800 . ? 
C7 H7A 0.9800 . ? 
C7 H7B 0.9800 . ? 
C7 H7C 0.9800 . ? 
C8 H8A 0.9800 . ? 
C8 H8B 0.9800 . ? 
C8 H8C 0.9800 . ? 
C9 H9A 0.9800 . ? 
C9 H9B 0.9800 . ? 
C9 H9C 0.9800 . ? 
C10 C11 1.475(5) . ? 
C10 H10 0.98(3) . ? 
C11 C12 1.350(5) . ? 
C11 H11 0.98(3) . ? 
C12 H12 0.94(3) . ? 
C13 H13A 0.9800 . ? 
C13 H13B 0.9800 . ? 
C13 H13C 0.9800 . ? 
C14 H14A 0.9800 . ? 
C14 H14B 0.9800 . ? 
C14 H14C 0.9800 . ? 
C15 H15A 0.9800 . ? 
C15 H15B 0.9800 . ? 
C15 H15C 0.9800 . ? 
C16 H16A 0.9800 . ? 
C16 H16B 0.9800 . ? 
C16 H16C 0.9800 . ? 
C17 H17A 0.9800 . ? 
C17 H17B 0.9800 . ? 
C17 H17C 0.9800 . ? 
C18 H18A 0.9800 . ? 
C18 H18B 0.9800 . ? 
C18 H18C 0.9800 . ? 
C19 C20 1.476(5) . ? 
C19 H19 0.92(4) . ? 
C20 C21 1.358(5) . ? 
C20 H20 1.03(4) . ? 
C21 H21 0.93(4) . ? 
C22 H22A 0.9800 . ? 
C22 H22B 0.9800 . ? 
C22 H22C 0.9800 . ? 
C23 H23A 0.9800 . ? 
C23 H23B 0.9800 . ? 
C23 H23C 0.9800 . ? 
C24 H24A 0.9800 . ? 
C24 H24B 0.9800 . ? 
C24 H24C 0.9800 . ? 
C25 H25A 0.9800 . ? 
C25 H25B 0.9800 . ? 
C25 H25C 0.9800 . ? 
C26 H26A 0.9800 . ? 
C26 H26B 0.9800 . ? 
C26 H26C 0.9800 . ? 
C27 H27A 0.9800 . ? 
C27 H27B 0.9800 . ? 
C27 H27C 0.9800 . ? 
  
loop_ 
 _geom_angle_atom_site_label_1 
 _geom_angle_atom_site_label_2 
 _geom_angle_atom_site_label_3 
 _geom_angle 
 _geom_angle_site_symmetry_1 
 _geom_angle_site_symmetry_3 
 _geom_angle_publ_flag 
C21 K1 C3 111.06(12) . . ? 
C21 K1 C12 111.42(12) . . ? 
C3 K1 C12 100.80(11) . . ? 
C21 K1 C20 25.71(10) . . ? 
C3 K1 C20 89.63(11) . . ? 
C12 K1 C20 103.44(11) . . ? 
C21 K1 C2 104.07(11) . . ? 
C3 K1 C2 25.42(10) . . ? 
C12 K1 C2 81.13(11) . . ? 
C20 K1 C2 78.71(10) . . ? 
C21 K1 C11 89.51(11) . . ? 
C3 K1 C11 98.95(11) . . ? 
C12 K1 C11 24.90(10) . . ? 
C20 K1 C11 78.60(10) . . ? 
C2 K1 C11 74.36(10) . . ? 
C21 K1 C9 137.43(12) . . ? 
C3 K1 C9 59.39(11) . . ? 
C12 K1 C9 111.13(11) . . ? 
C20 K1 C9 136.68(11) . . ? 
C2 K1 C9 81.61(10) . . ? 
C11 K1 C9 131.63(11) . . ? 
C21 K1 C25 59.45(11) . . ? 
C3 K1 C25 115.22(12) . . ? 
C12 K1 C25 143.85(12) . . ? 
C20 K1 C25 80.81(10) . . ? 
C2 K1 C25 134.14(11) . . ? 
C11 K1 C25 139.70(11) . . ? 
C9 K1 C25 86.04(11) . . ? 
C21 K1 C17 128.54(11) . . ? 
C3 K1 C17 120.22(11) . . ? 
C12 K1 C17 56.49(10) . . ? 
C20 K1 C17 145.10(11) . . ? 
C2 K1 C17 120.10(11) . . ? 
C11 K1 C17 79.14(10) . . ? 
C9 K1 C17 77.72(11) . . ? 
C25 K1 C17 99.72(11) . . ? 
C21 K1 Si2 138.97(9) . . ? 
C3 K1 Si2 31.60(8) . . ? 
C12 K1 Si2 96.79(8) . . ? 
C20 K1 Si2 120.80(8) . . ? 
C2 K1 Si2 50.25(7) . . ? 
C11 K1 Si2 108.34(8) . . ? 
C9 K1 Si2 31.89(7) . . ? 
C25 K1 Si2 111.96(9) . . ? 
C17 K1 Si2 91.66(8) . . ? 
C21 K1 Si4 111.16(9) . . ? 
C3 K1 Si4 125.82(9) . . ? 
C12 K1 Si4 31.36(8) . . ? 
C20 K1 Si4 117.56(8) . . ? 
C2 K1 Si4 111.01(8) . . ? 
C11 K1 Si4 49.71(7) . . ? 
C9 K1 Si4 105.46(8) . . ? 
C25 K1 Si4 114.85(9) . . ? 
C17 K1 Si4 30.94(7) . . ? 
Si2 K1 Si4 108.41(3) . . ? 
C21 K1 Be1 70.39(11) . . ? 
C3 K1 Be1 69.34(11) . . ? 
C12 K1 Be1 66.95(11) . . ? 
C20 K1 Be1 47.06(11) . . ? 
C2 K1 Be1 45.94(11) . . ? 
C11 K1 Be1 45.34(11) . . ? 
C9 K1 Be1 127.54(11) . . ? 
C25 K1 Be1 127.81(11) . . ? 
C17 K1 Be1 123.44(11) . . ? 
Si2 K1 Be1 95.95(9) . . ? 
Si4 K1 Be1 95.04(9) . . ? 
C1 Be1 C10 119.1(3) . . ? 
C1 Be1 C19 119.0(3) . . ? 
C10 Be1 C19 119.4(3) . . ? 
C1 Be1 K1 83.7(2) . . ? 
C10 Be1 K1 88.2(2) . . ? 
C19 Be1 K1 82.5(2) . . ? 
C6 Si1 C1 112.29(18) . . ? 
C6 Si1 C4 107.0(2) . . ? 
C1 Si1 C4 109.34(19) . . ? 
C6 Si1 C5 108.27(19) . . ? 
C1 Si1 C5 111.54(18) . . ? 
C4 Si1 C5 108.2(2) . . ? 
C8 Si2 C3 110.78(19) . . ? 
C8 Si2 C7 110.9(2) . . ? 
C3 Si2 C7 109.43(19) . . ? 
C8 Si2 C9 107.62(19) . . ? 
C3 Si2 C9 110.71(19) . . ? 
C7 Si2 C9 107.31(19) . . ? 
C8 Si2 K1 156.17(15) . . ? 
C3 Si2 K1 56.44(13) . . ? 
C7 Si2 K1 92.80(14) . . ? 
C9 Si2 K1 65.23(13) . . ? 
C10 Si3 C15 111.27(19) . . ? 
C10 Si3 C14 111.97(18) . . ? 
C15 Si3 C14 108.94(19) . . ? 
C10 Si3 C13 110.59(18) . . ? 
C15 Si3 C13 106.6(2) . . ? 
C14 Si3 C13 107.21(19) . . ? 
C12 Si4 C18 109.46(19) . . ? 
C12 Si4 C16 110.20(19) . . ? 
C18 Si4 C16 110.5(2) . . ? 
C12 Si4 C17 111.42(19) . . ? 
C18 Si4 C17 108.5(2) . . ? 
C16 Si4 C17 106.8(2) . . ? 
C12 Si4 K1 56.00(12) . . ? 
C18 Si4 K1 85.97(15) . . ? 
C16 Si4 K1 162.28(15) . . ? 
C17 Si4 K1 72.50(13) . . ? 
C19 Si5 C23 112.72(19) . . ? 
C19 Si5 C22 111.42(19) . . ? 
C23 Si5 C22 107.8(2) . . ? 
C19 Si5 C24 109.6(2) . . ? 
C23 Si5 C24 107.2(2) . . ? 
C22 Si5 C24 107.9(2) . . ? 
C21 Si6 C27 109.6(2) . . ? 
C21 Si6 C26 110.01(19) . . ? 
C27 Si6 C26 111.5(2) . . ? 
C21 Si6 C25 111.58(19) . . ? 
C27 Si6 C25 107.7(2) . . ? 
C26 Si6 C25 106.5(2) . . ? 
C21 Si6 K1 54.26(13) . . ? 
C27 Si6 K1 147.66(17) . . ? 
C26 Si6 K1 100.79(16) . . ? 
C25 Si6 K1 63.52(13) . . ? 
C2 C1 Be1 108.5(3) . . ? 
C2 C1 Si1 107.5(3) . . ? 
Be1 C1 Si1 116.7(3) . . ? 
C2 C1 H1 108.5(19) . . ? 
Be1 C1 H1 107.7(19) . . ? 
Si1 C1 H1 107.7(19) . . ? 
C3 C2 C1 130.5(4) . . ? 
C3 C2 K1 69.0(2) . . ? 
C1 C2 K1 106.8(2) . . ? 
C3 C2 H2 113(2) . . ? 
C1 C2 H2 116(2) . . ? 
K1 C2 H2 93(2) . . ? 
C2 C3 Si2 125.3(3) . . ? 
C2 C3 K1 85.5(2) . . ? 
Si2 C3 K1 91.97(15) . . ? 
C2 C3 H3 114(2) . . ? 
Si2 C3 H3 120(2) . . ? 
K1 C3 H3 101(2) . . ? 
Si1 C4 H4A 109.5 . . ? 
Si1 C4 H4B 109.5 . . ? 
H4A C4 H4B 109.5 . . ? 
Si1 C4 H4C 109.5 . . ? 
H4A C4 H4C 109.5 . . ? 
H4B C4 H4C 109.5 . . ? 
Si1 C5 H5A 109.5 . . ? 
Si1 C5 H5B 109.5 . . ? 
H5A C5 H5B 109.5 . . ? 
Si1 C5 H5C 109.5 . . ? 
H5A C5 H5C 109.5 . . ? 
H5B C5 H5C 109.5 . . ? 
Si1 C6 H6A 109.5 . . ? 
Si1 C6 H6B 109.5 . . ? 
H6A C6 H6B 109.5 . . ? 
Si1 C6 H6C 109.5 . . ? 
H6A C6 H6C 109.5 . . ? 
H6B C6 H6C 109.5 . . ? 
Si2 C7 H7A 109.5 . . ? 
Si2 C7 H7B 109.5 . . ? 
H7A C7 H7B 109.5 . . ? 
Si2 C7 H7C 109.5 . . ? 
H7A C7 H7C 109.5 . . ? 
H7B C7 H7C 109.5 . . ? 
Si2 C8 H8A 109.5 . . ? 
Si2 C8 H8B 109.5 . . ? 
H8A C8 H8B 109.5 . . ? 
Si2 C8 H8C 109.5 . . ? 
H8A C8 H8C 109.5 . . ? 
H8B C8 H8C 109.5 . . ? 
Si2 C9 K1 82.89(14) . . ? 
Si2 C9 H9A 109.5 . . ? 
K1 C9 H9A 75.2 . . ? 
Si2 C9 H9B 109.5 . . ? 
K1 C9 H9B 54.6 . . ? 
H9A C9 H9B 109.5 . . ? 
Si2 C9 H9C 109.5 . . ? 
K1 C9 H9C 163.3 . . ? 
H9A C9 H9C 109.5 . . ? 
H9B C9 H9C 109.5 . . ? 
C11 C10 Be1 106.8(3) . . ? 
C11 C10 Si3 110.0(3) . . ? 
Be1 C10 Si3 118.4(3) . . ? 
C11 C10 H10 109(2) . . ? 
Be1 C10 H10 108(2) . . ? 
Si3 C10 H10 105(2) . . ? 
C12 C11 C10 128.7(4) . . ? 
C12 C11 K1 66.6(2) . . ? 
C10 C11 K1 110.5(2) . . ? 
C12 C11 H11 117(2) . . ? 
C10 C11 H11 115(2) . . ? 
K1 C11 H11 94(2) . . ? 
C11 C12 Si4 125.7(3) . . ? 
C11 C12 K1 88.5(2) . . ? 
Si4 C12 K1 92.64(15) . . ? 
C11 C12 H12 118(2) . . ? 
Si4 C12 H12 115(2) . . ? 
K1 C12 H12 100(2) . . ? 
Si3 C13 H13A 109.5 . . ? 
Si3 C13 H13B 109.5 . . ? 
H13A C13 H13B 109.5 . . ? 
Si3 C13 H13C 109.5 . . ? 
H13A C13 H13C 109.5 . . ? 
H13B C13 H13C 109.5 . . ? 
Si3 C14 H14A 109.5 . . ? 
Si3 C14 H14B 109.5 . . ? 
H14A C14 H14B 109.5 . . ? 
Si3 C14 H14C 109.5 . . ? 
H14A C14 H14C 109.5 . . ? 
H14B C14 H14C 109.5 . . ? 
Si3 C15 H15A 109.5 . . ? 
Si3 C15 H15B 109.5 . . ? 
H15A C15 H15B 109.5 . . ? 
Si3 C15 H15C 109.5 . . ? 
H15A C15 H15C 109.5 . . ? 
H15B C15 H15C 109.5 . . ? 
Si4 C16 H16A 109.5 . . ? 
Si4 C16 H16B 109.5 . . ? 
H16A C16 H16B 109.5 . . ? 
Si4 C16 H16C 109.5 . . ? 
H16A C16 H16C 109.5 . . ? 
H16B C16 H16C 109.5 . . ? 
Si4 C17 K1 76.57(13) . . ? 
Si4 C17 H17A 109.5 . . ? 
K1 C17 H17A 44.0 . . ? 
Si4 C17 H17B 109.5 . . ? 
K1 C17 H17B 150.3 . . ? 
H17A C17 H17B 109.5 . . ? 
Si4 C17 H17C 109.5 . . ? 
K1 C17 H17C 94.7 . . ? 
H17A C17 H17C 109.5 . . ? 
H17B C17 H17C 109.5 . . ? 
Si4 C18 H18A 109.5 . . ? 
Si4 C18 H18B 109.5 . . ? 
H18A C18 H18B 109.5 . . ? 
Si4 C18 H18C 109.5 . . ? 
H18A C18 H18C 109.5 . . ? 
H18B C18 H18C 109.5 . . ? 
C20 C19 Be1 110.8(3) . . ? 
C20 C19 Si5 106.9(3) . . ? 
Be1 C19 Si5 116.5(3) . . ? 
C20 C19 H19 110(2) . . ? 
Be1 C19 H19 106(2) . . ? 
Si5 C19 H19 106(2) . . ? 
C21 C20 C19 130.2(4) . . ? 
C21 C20 K1 69.9(2) . . ? 
C19 C20 K1 106.5(2) . . ? 
C21 C20 H20 113(2) . . ? 
C19 C20 H20 117(2) . . ? 
K1 C20 H20 95.7(19) . . ? 
C20 C21 Si6 125.6(3) . . ? 
C20 C21 K1 84.4(2) . . ? 
Si6 C21 K1 95.23(16) . . ? 
C20 C21 H21 115(3) . . ? 
Si6 C21 H21 120(3) . . ? 
K1 C21 H21 94(2) . . ? 
Si5 C22 H22A 109.5 . . ? 
Si5 C22 H22B 109.5 . . ? 
H22A C22 H22B 109.5 . . ? 
Si5 C22 H22C 109.5 . . ? 
H22A C22 H22C 109.5 . . ? 
H22B C22 H22C 109.5 . . ? 
Si5 C23 H23A 109.5 . . ? 
Si5 C23 H23B 109.5 . . ? 
H23A C23 H23B 109.5 . . ? 
Si5 C23 H23C 109.5 . . ? 
H23A C23 H23C 109.5 . . ? 
H23B C23 H23C 109.5 . . ? 
Si5 C24 H24A 109.5 . . ? 
Si5 C24 H24B 109.5 . . ? 
H24A C24 H24B 109.5 . . ? 
Si5 C24 H24C 109.5 . . ? 
H24A C24 H24C 109.5 . . ? 
H24B C24 H24C 109.5 . . ? 
Si6 C25 K1 85.20(14) . . ? 
Si6 C25 H25A 109.5 . . ? 
K1 C25 H25A 73.4 . . ? 
Si6 C25 H25B 109.5 . . ? 
K1 C25 H25B 54.4 . . ? 
H25A C25 H25B 109.5 . . ? 
Si6 C25 H25C 109.5 . . ? 
K1 C25 H25C 162.1 . . ? 
H25A C25 H25C 109.5 . . ? 
H25B C25 H25C 109.5 . . ? 
Si6 C26 H26A 109.5 . . ? 
Si6 C26 H26B 109.5 . . ? 
H26A C26 H26B 109.5 . . ? 
Si6 C26 H26C 109.5 . . ? 
H26A C26 H26C 109.5 . . ? 
H26B C26 H26C 109.5 . . ? 
Si6 C27 H27A 109.5 . . ? 
Si6 C27 H27B 109.5 . . ? 
H27A C27 H27B 109.5 . . ? 
Si6 C27 H27C 109.5 . . ? 
H27A C27 H27C 109.5 . . ? 
H27B C27 H27C 109.5 . . ? 
  
loop_ 
 _geom_torsion_atom_site_label_1 
 _geom_torsion_atom_site_label_2 
 _geom_torsion_atom_site_label_3 
 _geom_torsion_atom_site_label_4 
 _geom_torsion 
 _geom_torsion_site_symmetry_1 
 _geom_torsion_site_symmetry_2 
 _geom_torsion_site_symmetry_3 
 _geom_torsion_site_symmetry_4 
 _geom_torsion_publ_flag 
C10 Be1 C1 C2 51.0(4) . . . . ? 
C19 Be1 C1 C2 -111.2(4) . . . . ? 
K1 Be1 C1 C2 -33.4(3) . . . . ? 
C10 Be1 C1 Si1 -70.5(4) . . . . ? 
C19 Be1 C1 Si1 127.3(3) . . . . ? 
K1 Be1 C1 Si1 -154.9(2) . . . . ? 
C6 Si1 C1 C2 -172.5(3) . . . . ? 
C4 Si1 C1 C2 69.0(3) . . . . ? 
C5 Si1 C1 C2 -50.7(3) . . . . ? 
C6 Si1 C1 Be1 -50.4(3) . . . . ? 
C4 Si1 C1 Be1 -169.0(3) . . . . ? 
C5 Si1 C1 Be1 71.4(3) . . . . ? 
Be1 C1 C2 C3 117.4(4) . . . . ? 
Si1 C1 C2 C3 -115.6(4) . . . . ? 
Be1 C1 C2 K1 40.8(3) . . . . ? 
Si1 C1 C2 K1 167.89(15) . . . . ? 
C1 C2 C3 Si2 176.1(3) . . . . ? 
K1 C2 C3 Si2 -89.3(3) . . . . ? 
C1 C2 C3 K1 -94.6(4) . . . . ? 
C8 Si2 C3 C2 -116.8(4) . . . . ? 
C7 Si2 C3 C2 5.8(4) . . . . ? 
C9 Si2 C3 C2 123.9(4) . . . . ? 
K1 Si2 C3 C2 85.9(4) . . . . ? 
C8 Si2 C3 K1 157.28(16) . . . . ? 
C7 Si2 C3 K1 -80.11(18) . . . . ? 
C9 Si2 C3 K1 38.0(2) . . . . ? 
C8 Si2 C9 K1 -155.57(16) . . . . ? 
C3 Si2 C9 K1 -34.37(18) . . . . ? 
C7 Si2 C9 K1 84.99(16) . . . . ? 
C1 Be1 C10 C11 -107.8(4) . . . . ? 
C19 Be1 C10 C11 54.4(4) . . . . ? 
K1 Be1 C10 C11 -26.0(3) . . . . ? 
C1 Be1 C10 Si3 127.6(3) . . . . ? 
C19 Be1 C10 Si3 -70.3(4) . . . . ? 
K1 Be1 C10 Si3 -150.7(2) . . . . ? 
C15 Si3 C10 C11 -54.3(3) . . . . ? 
C14 Si3 C10 C11 -176.4(3) . . . . ? 
C13 Si3 C10 C11 64.0(3) . . . . ? 
C15 Si3 C10 Be1 68.8(3) . . . . ? 
C14 Si3 C10 Be1 -53.4(3) . . . . ? 
C13 Si3 C10 Be1 -172.9(3) . . . . ? 
Be1 C10 C11 C12 107.5(5) . . . . ? 
Si3 C10 C11 C12 -122.9(4) . . . . ? 
Be1 C10 C11 K1 31.6(3) . . . . ? 
Si3 C10 C11 K1 161.23(16) . . . . ? 
C10 C11 C12 Si4 169.6(3) . . . . ? 
K1 C11 C12 Si4 -92.2(3) . . . . ? 
C10 C11 C12 K1 -98.2(4) . . . . ? 
C18 Si4 C12 C11 19.2(4) . . . . ? 
C16 Si4 C12 C11 -102.5(4) . . . . ? 
C17 Si4 C12 C11 139.2(4) . . . . ? 
K1 Si4 C12 C11 90.1(4) . . . . ? 
C18 Si4 C12 K1 -70.8(2) . . . . ? 
C16 Si4 C12 K1 167.45(17) . . . . ? 
C17 Si4 C12 K1 49.1(2) . . . . ? 
C12 Si4 C17 K1 -41.10(17) . . . . ? 
C18 Si4 C17 K1 79.45(16) . . . . ? 
C16 Si4 C17 K1 -161.46(16) . . . . ? 
C1 Be1 C19 C20 46.9(5) . . . . ? 
C10 Be1 C19 C20 -115.2(4) . . . . ? 
K1 Be1 C19 C20 -31.6(3) . . . . ? 
C1 Be1 C19 Si5 -75.6(4) . . . . ? 
C10 Be1 C19 Si5 122.3(3) . . . . ? 
K1 Be1 C19 Si5 -154.0(2) . . . . ? 
C23 Si5 C19 C20 -173.8(3) . . . . ? 
C22 Si5 C19 C20 -52.4(3) . . . . ? 
C24 Si5 C19 C20 66.9(3) . . . . ? 
C23 Si5 C19 Be1 -49.3(3) . . . . ? 
C22 Si5 C19 Be1 72.1(3) . . . . ? 
C24 Si5 C19 Be1 -168.6(3) . . . . ? 
Be1 C19 C20 C21 115.9(5) . . . . ? 
Si5 C19 C20 C21 -116.2(4) . . . . ? 
Be1 C19 C20 K1 38.6(3) . . . . ? 
Si5 C19 C20 K1 166.55(16) . . . . ? 
C19 C20 C21 Si6 172.6(3) . . . . ? 
K1 C20 C21 Si6 -92.4(3) . . . . ? 
C19 C20 C21 K1 -94.9(4) . . . . ? 
C27 Si6 C21 C20 -125.0(4) . . . . ? 
C26 Si6 C21 C20 -2.2(4) . . . . ? 
C25 Si6 C21 C20 115.8(4) . . . . ? 
K1 Si6 C21 C20 86.9(4) . . . . ? 
C27 Si6 C21 K1 148.09(18) . . . . ? 
C26 Si6 C21 K1 -89.0(2) . . . . ? 
C25 Si6 C21 K1 28.9(2) . . . . ? 
C21 Si6 C25 K1 -26.0(2) . . . . ? 
C27 Si6 C25 K1 -146.29(18) . . . . ? 
C26 Si6 C25 K1 94.06(17) . . . . ? 
  
_refine_diff_density_max    0.364 
_refine_diff_density_min   -0.336 
_refine_diff_density_rms    0.072 
  
_shelx_res_file 
; 
  
    hannr05.res created by SHELXL-2014/7 
  
  
TITL hannr05 in P-1 
CELL 0.71073  11.93650  13.09730  13.75800  80.1655  73.0870  89.7385 
ZERR    2.00   0.00290   0.00330   0.00340   0.0051   0.0050   0.0054 
LATT  1 
SFAC C H BE SI K 
UNIT 54 126 2 12 2 
TEMP -173 
SIZE 0.20 0.20 0.08 
  
OMIT  0  1  0 
OMIT  0  0  1 
  
L.S. 8 
BOND $H 
FMAP 2 
PLAN 18 
  
ACTA 52.945 
CONF 
LIST 4 
HTAB 
  
WGHT    0.046400 
FVAR       0.19217 
K1    5    0.569578    0.301453    0.234702    11.00000    0.03256    0.03450 = 
         0.03150   -0.01047   -0.01059    0.00325 
BE1   3    0.840922    0.290746    0.298763    11.00000    0.01274    0.02824 = 
         0.02993   -0.00242   -0.00979   -0.00180 
SI1   4    0.811825    0.181505    0.525397    11.00000    0.02288    0.03478 = 
         0.02589   -0.00200   -0.01140   -0.00156 
SI2   4    0.387523    0.222216    0.489452    11.00000    0.01915    0.02946 = 
         0.03425   -0.00316   -0.01022   -0.00137 
SI3   4    0.970288    0.507596    0.273171    11.00000    0.02035    0.02949 = 
         0.03667   -0.00596   -0.01033   -0.00040 
SI4   4    0.576432    0.576057    0.174359    11.00000    0.02593    0.03154 = 
         0.02966   -0.00343   -0.01132    0.00551 
SI5   4    1.025679    0.169073    0.155463    11.00000    0.01984    0.04312 = 
         0.03046   -0.00874   -0.00689    0.00461 
SI6   4    0.645569    0.129394    0.049447    11.00000    0.02964    0.03722 = 
         0.02875   -0.00903   -0.01638    0.00660 
C1    1    0.759730    0.197843    0.408123    11.00000    0.02015    0.02155 = 
         0.02508   -0.00879   -0.00679    0.00402 
H1    2    0.761845    0.132384    0.386956    11.00000    0.01305 
C2    1    0.636901    0.227744    0.438885    11.00000    0.02472    0.02367 = 
         0.02108   -0.00069   -0.00867    0.00164 
H2    2    0.624349    0.291770    0.458926    11.00000    0.01596 
C3    1    0.537371    0.177492    0.441072    11.00000    0.02678    0.02435 = 
         0.03841   -0.00955   -0.01470    0.00589 
H3    2    0.547957    0.113698    0.426277    11.00000    0.02164 
C4    1    0.734707    0.064589    0.618901    11.00000    0.04922    0.05957 = 
         0.03617    0.00491   -0.01917   -0.01144 
AFIX 137 
H4A   2    0.754117    0.060958    0.683856    11.00000   -1.50000 
H4B   2    0.759763    0.002009    0.589907    11.00000   -1.50000 
H4C   2    0.649833    0.069538    0.631934    11.00000   -1.50000 
AFIX   0 
C5    1    0.780762    0.296871    0.591287    11.00000    0.03296    0.05865 = 
         0.03718   -0.01586   -0.01987    0.00157 
AFIX 137 
H5A   2    0.818187    0.359425    0.542678    11.00000   -1.50000 
H5B   2    0.811959    0.287129    0.650549    11.00000   -1.50000 
H5C   2    0.695891    0.304408    0.615102    11.00000   -1.50000 
AFIX   0 
C6    1    0.972050    0.160604    0.494603    11.00000    0.02576    0.04877 = 
         0.04494   -0.00099   -0.01619    0.00568 
AFIX 137 
H6A   2    1.015976    0.223347    0.451263    11.00000   -1.50000 
H6B   2    0.990536    0.102158    0.457578    11.00000   -1.50000 
H6C   2    0.993863    0.145321    0.558781    11.00000   -1.50000 
AFIX   0 
C7    1    0.395722    0.353735    0.522025    11.00000    0.02928    0.03887 = 
         0.04083   -0.00648   -0.00641    0.00170 
AFIX 137 
H7A   2    0.316267    0.376461    0.549999    11.00000   -1.50000 
H7B   2    0.437161    0.402671    0.459621    11.00000   -1.50000 
H7C   2    0.438054    0.351281    0.573595    11.00000   -1.50000 
AFIX   0 
C8    1    0.300024    0.129856    0.602400    11.00000    0.03198    0.04801 = 
         0.04189   -0.00164   -0.01116    0.00046 
AFIX 137 
H8A   2    0.298756    0.060905    0.583991    11.00000   -1.50000 
H8B   2    0.219732    0.152849    0.624313    11.00000   -1.50000 
H8C   2    0.335039    0.126681    0.658977    11.00000   -1.50000 
AFIX   0 
C9    1    0.310118    0.233198    0.387580    11.00000    0.02222    0.04944 = 
         0.04742   -0.00130   -0.01634   -0.00224 
AFIX 137 
H9A   2    0.331960    0.176594    0.348444    11.00000   -1.50000 
H9B   2    0.332800    0.299913    0.340738    11.00000   -1.50000 
H9C   2    0.225173    0.228821    0.420360    11.00000   -1.50000 
AFIX   0 
C10   1    0.831384    0.427567    0.304839    11.00000    0.02253    0.02619 = 
         0.02721   -0.00523   -0.00771    0.00080 
H10   2    0.789031    0.433942    0.376341    11.00000    0.02635 
C11   1    0.760896    0.471291    0.237057    11.00000    0.02298    0.02424 = 
         0.02439   -0.00430   -0.00489   -0.00118 
H11   2    0.801535    0.479041    0.162700    11.00000    0.02959 
C12   1    0.650043    0.503114    0.263609    11.00000    0.02379    0.02972 = 
         0.01925    0.00070   -0.00456   -0.00167 
H12   2    0.611382    0.499989    0.333900    11.00000    0.01372 
C13   1    0.938623    0.641738    0.300643    11.00000    0.03549    0.03183 = 
         0.06616   -0.01223   -0.02001   -0.00429 
AFIX 137 
H13A  2    0.904853    0.638584    0.375157    11.00000   -1.50000 
H13B  2    0.882890    0.671856    0.264975    11.00000   -1.50000 
H13C  2    1.011562    0.684941    0.276167    11.00000   -1.50000 
AFIX   0 
C14   1    1.067822    0.451186    0.351189    11.00000    0.02564    0.04242 = 
         0.04843   -0.00566   -0.01689   -0.00302 
AFIX 137 
H14A  2    1.023841    0.439463    0.424683    11.00000   -1.50000 
H14B  2    1.135092    0.499451    0.338539    11.00000   -1.50000 
H14C  2    1.095613    0.385101    0.331204    11.00000   -1.50000 
AFIX   0 
C15   1    1.052605    0.522193    0.133226    11.00000    0.02627    0.04363 = 
         0.04436   -0.00031   -0.00629   -0.00746 
AFIX 137 
H15A  2    1.064103    0.453505    0.113692    11.00000   -1.50000 
H15B  2    1.129037    0.557600    0.120321    11.00000   -1.50000 
H15C  2    1.007893    0.563138    0.092194    11.00000   -1.50000 
AFIX   0 
C16   1    0.573140    0.716074    0.186307    11.00000    0.05232    0.03730 = 
         0.05432    0.00074   -0.02520    0.00621 
AFIX 137 
H16A  2    0.653544    0.745295    0.167838    11.00000   -1.50000 
H16B  2    0.531734    0.722692    0.257598    11.00000   -1.50000 
H16C  2    0.532413    0.753684    0.139753    11.00000   -1.50000 
AFIX   0 
C17   1    0.420253    0.527788    0.205346    11.00000    0.03548    0.04520 = 
         0.05050   -0.00352   -0.02279    0.00813 
AFIX 137 
H17A  2    0.418172    0.458942    0.186876    11.00000   -1.50000 
H17B  2    0.379471    0.575854    0.166003    11.00000   -1.50000 
H17C  2    0.381456    0.523330    0.279363    11.00000   -1.50000 
AFIX   0 
C18   1    0.654991    0.560900    0.039572    11.00000    0.05510    0.05914 = 
         0.02965   -0.00476   -0.01042    0.02501 
AFIX 137 
H18A  2    0.735985    0.588686    0.021111    11.00000   -1.50000 
H18B  2    0.615333    0.598840   -0.007692    11.00000   -1.50000 
H18C  2    0.654983    0.487199    0.034384    11.00000   -1.50000 
AFIX   0 
C19   1    0.894762    0.250693    0.174386    11.00000    0.02040    0.03064 = 
         0.02436   -0.00225   -0.00400   -0.00398 
H19   2    0.917048    0.310610    0.126540    11.00000    0.03454 
C20   1    0.801966    0.192514    0.152441    11.00000    0.02126    0.02808 = 
         0.02385   -0.00566   -0.00648    0.00485 
H20   2    0.773704    0.121317    0.197982    11.00000    0.02899 
C21   1    0.748671    0.215922    0.077195    11.00000    0.02659    0.03004 = 
         0.02593   -0.00193   -0.00861    0.00205 
H21   2    0.771929    0.280200    0.034867    11.00000    0.04305 
C22   1    0.987104    0.034729    0.231118    11.00000    0.03269    0.04349 = 
         0.05333   -0.01361   -0.01269    0.01416 
AFIX 137 
H22A  2    0.945530    0.038237    0.303180    11.00000   -1.50000 
H22B  2    1.058918   -0.002831    0.227940    11.00000   -1.50000 
H22C  2    0.936642   -0.001648    0.201897    11.00000   -1.50000 
AFIX   0 
C23   1    1.147120    0.224578    0.193950    11.00000    0.02350    0.05536 = 
         0.04555   -0.00621   -0.01236    0.00354 
AFIX 137 
H23A  2    1.124967    0.217275    0.269292    11.00000   -1.50000 
H23B  2    1.161544    0.298205    0.162837    11.00000   -1.50000 
H23C  2    1.218484    0.187338    0.169888    11.00000   -1.50000 
AFIX   0 
C24   1    1.085179    0.159030    0.015446    11.00000    0.03694    0.07571 = 
         0.04021   -0.01809   -0.00523    0.01400 
AFIX 137 
H24A  2    1.023367    0.130943   -0.007706    11.00000   -1.50000 
H24B  2    1.150874    0.112877    0.006284    11.00000   -1.50000 
H24C  2    1.112365    0.228026   -0.025353    11.00000   -1.50000 
AFIX   0 
C25   1    0.495499    0.182601    0.073126    11.00000    0.03429    0.05876 = 
         0.05289   -0.02164   -0.02291    0.01094 
AFIX 137 
H25A  2    0.502442    0.256779    0.043886    11.00000   -1.50000 
H25B  2    0.456526    0.172748    0.147578    11.00000   -1.50000 
H25C  2    0.449219    0.146040    0.040272    11.00000   -1.50000 
AFIX   0 
C26   1    0.628448    0.001708    0.136671    11.00000    0.05516    0.03774 = 
         0.07149   -0.01034   -0.03903    0.00072 
AFIX 137 
H26A  2    0.705292   -0.028314    0.128503    11.00000   -1.50000 
H26B  2    0.576357   -0.045014    0.119142    11.00000   -1.50000 
H26C  2    0.594669    0.011118    0.208367    11.00000   -1.50000 
AFIX   0 
C27   1    0.698209    0.115280   -0.087947    11.00000    0.04502    0.08610 = 
         0.04159   -0.02497   -0.01794    0.00342 
AFIX 137 
H27A  2    0.774661    0.083881   -0.101595    11.00000   -1.50000 
H27B  2    0.705845    0.183720   -0.131850    11.00000   -1.50000 
H27C  2    0.641979    0.070769   -0.103106    11.00000   -1.50000 
  
AFIX   0 
HKLF 4 
  
REM  hannr05 in P-1 
REM R1 =  0.0588 for    4292 Fo > 4sig(Fo)  and  0.1280 for all    7725 data 
REM    370 parameters refined using      0 restraints 
  
END 
  
WGHT      0.0451      0.0000 
  
REM No hydrogen bonds found for HTAB generation 
  
REM Highest difference peak  0.364,  deepest hole -0.336,  1-sigma level  0.072 
Q1    1   1.0602  0.1586  0.0944  11.00000  0.05    0.36 
Q2    1   0.6202  0.5725  0.1011  11.00000  0.05    0.34 
Q3    1   0.7011  0.3837  0.5559  11.00000  0.05    0.32 
Q4    1   0.6760  0.0506  0.0723  11.00000  0.05    0.31 
Q5    1   0.8929  0.2943  0.2292  11.00000  0.05    0.30 
Q6    1   0.6025  0.5065  0.2137  11.00000  0.05    0.29 
Q7    1   0.3858  0.2965  0.4719  11.00000  0.05    0.27 
Q8    1   0.7756  0.0350  0.6806  11.00000  0.05    0.27 
Q9    1   0.7758  0.0819  0.3818  11.00000  0.05    0.27 
Q10   1   0.8135  0.3578  0.3224  11.00000  0.05    0.27 
Q11   1   0.6752  0.3895  0.6460  11.00000  0.05    0.27 
Q12   1   0.7892  0.2216  0.3481  11.00000  0.05    0.27 
Q13   1   0.7232  0.2609  0.5942  11.00000  0.05    0.26 
Q14   1   0.7723  0.1835  0.5871  11.00000  0.05    0.26 
Q15   1   0.4749  0.1237  0.3149  11.00000  0.05    0.25 
Q16   1   0.8755  0.3227  0.1028  11.00000  0.05    0.25 
Q17   1   0.9429  0.5871  0.2494  11.00000  0.05    0.25 
Q18   1   0.9927  0.4313  0.3123  11.00000  0.05    0.25 
; 
_shelx_res_checksum   68842 
  
_shelx_hkl_file 
; 
  -2   0   0   65.42    2.56 
   2   0   0   64.38    1.78 
   2   0   0   65.79    2.79 
   2   0   0   65.49    2.98 
  -3   0   0  222.19    6.29 
   3   0   0  206.77    4.86 
   3   0   0  202.58    6.84 
   3   0   0  207.21    6.59 
  -4   0   0    0.99    1.50 
   4   0   0    1.51    1.57 
   4   0   0    4.31    0.81 
   4   0   0    1.09    1.51 
  -5   0   0  318.61    9.56 
   5   0   0  334.82   10.79 
   5   0   0  314.12   10.32 
   5   0   0  336.63    7.58 
  -6   0   0    3.36    1.81 
   6   0   0    2.01    2.30 
   6   0   0    0.97    1.59 
   6   0   0    4.00    0.87 
  -7   0   0    1.63    2.18 
   7   0   0   -0.11    1.91 
   7   0   0    1.05    0.72 
   7   0   0   -0.30    2.00 
  -8   0   0    6.88    2.89 
   8   0   0   13.16    3.40 
   8   0   0    8.36    3.15 
   8   0   0    6.96    1.09 
  -9   0   0   -1.45    2.39 
   9   0   0    0.62    0.77 
   9   0   0   -2.72    2.14 
   9   0   0   -0.84    2.30 
 -10   0   0    3.65    3.07 
  10   0   0    0.37    2.85 
  10   0   0   -0.40    2.57 
 -11   0   0   -0.03    2.66 
  11   0   0    0.75    2.46 
 -12   0   0    3.05    2.95 
  12   0   0    1.25    3.09 
 -13   0   0   15.40    4.49 
  13   0   0   15.26    4.95 
  13  -1   0   17.61    5.60 
 -13   1   0   10.12    3.98 
  12  -1   0   45.08    6.37 
 -12   1   0   47.05    5.81 
  11  -1   0   62.15    6.46 
  11  -1   0   58.65    6.64 
 -11   1   0   67.12    6.08 
  10  -1   0    7.56    3.42 
  10  -1   0    3.52    2.82 
 -10   1   0    6.28    3.33 
   9  -1   0   -0.84    2.83 
   9  -1   0    0.50    2.56 
  -9   1   0    5.50    3.16 
   8  -1   0  111.31    6.99 
   8  -1   0  130.26    7.69 
  -8   1   0  113.25    6.53 
   7  -1   0   23.82    3.39 
   7  -1   0   32.89    4.17 
  -7   1   0   23.92    3.55 
   6  -1   0   40.92    4.15 
   6  -1   0   46.46    3.85 
  -6   1   0   41.67    3.65 
   5  -1   0   33.73    3.30 
   5  -1   0   29.16    3.07 
  -5   1   0   31.78    2.99 
   4  -1   0  253.19    8.11 
   4  -1   0  250.17    8.34 
  -4   1   0  250.50    7.79 
   3  -1   0  224.77    7.18 
   3  -1   0  232.39    7.06 
  -3   1   0  225.81    6.85 
   2  -1   0  208.23    6.04 
   2  -1   0  204.97    5.85 
  -2   1   0  206.40    5.77 
   1  -1   0   99.03    2.92 
   1  -1   0  104.64    3.08 
  -1   1   0  107.41    3.04 
   0   1   0    0.33    0.21 
   0   1   0   -0.07    0.18 
   1   1   0  120.84    3.65 
   1   1   0  121.53    3.18 
   2   1   0   38.45    2.54 
   2   1   0   36.58    2.25 
   2   1   0   37.42    1.64 
   3   1   0   83.58    2.86 
   3   1   0   78.67    3.91 
   3   1   0   83.16    4.17 
  -4  -1   0   24.42    2.30 
   4   1   0   27.21    1.73 
   4   1   0   29.58    2.90 
   4   1   0   29.60    2.98 
  -5  -1   0   16.18    2.35 
   5   1   0   16.99    3.10 
   5   1   0   14.79    2.65 
   5   1   0   17.62    1.52 
  -6  -1   0   57.29    3.81 
   6   1   0   56.90    4.56 
   6   1   0   56.84    4.45 
   6   1   0   58.68    2.63 
  -7  -1   0   -0.65    1.78 
   7   1   0   -1.40    1.66 
   7   1   0   -1.60    1.60 
   7   1   0    0.15    0.84 
  -8  -1   0    8.18    2.77 
   8   1   0    3.94    2.54 
   8   1   0    3.29    1.17 
   8   1   0    0.49    2.36 
  -9  -1   0   -0.55    2.65 
   9   1   0   -5.01    2.36 
   9   1   0   -0.11    1.02 
 -10  -1   0    4.24    3.13 
  10   1   0   -0.23    2.53 
 -11  -1   0   -1.65    2.53 
  11   1   0    0.72    2.97 
 -12  -1   0    7.64    3.69 
  12   1   0   17.64    5.23 
 -13  -1   0    1.28    2.95 
  13   1   0   -0.25    3.02 
  13  -2   0    5.60    3.72 
 -13   2   0    0.35    3.23 
  12  -2   0    2.07    3.22 
  12  -2   0    3.10    3.59 
 -12   2   0   -3.81    2.70 
  11  -2   0    2.26    2.98 
  11  -2   0    2.71    3.10 
 -11   2   0   -2.03    2.70 
  10  -2   0    0.24    2.83 
  10  -2   0    2.75    2.79 
 -10   2   0   -4.15    2.66 
   9  -2   0    2.82    2.86 
   9  -2   0   -0.18    2.18 
  -9   2   0   -2.63    2.63 
   8  -2   0   14.37    3.50 
   8  -2   0    9.07    3.34 
  -8   2   0   21.09    4.02 
   7  -2   0   -0.75    1.82 
   7  -2   0   -0.37    1.75 
  -7   2   0    0.72    2.23 
   6  -2   0   12.84    2.95 
   6  -2   0   15.50    3.05 
  -6   2   0    6.24    2.41 
   5  -2   0    2.98    1.93 
   5  -2   0   -1.15    1.46 
  -5   2   0    1.68    1.80 
   4  -2   0    8.00    2.20 
   4  -2   0    5.75    1.98 
  -4   2   0    5.81    1.98 
   3  -2   0  165.34    5.73 
   3  -2   0  158.95    5.90 
  -3   2   0  165.24    5.79 
  -3   2   0  163.31    3.71 
   2  -2   0  158.16    4.92 
   2  -2   0  155.15    5.20 
  -2   2   0  148.61    3.78 
  -2   2   0  153.61    5.11 
   1  -2   0    3.21    0.93 
   1  -2   0    2.61    1.19 
  -1   2   0    4.59    0.79 
  -1   2   0    1.86    0.90 
   0  -2   0  145.60    4.55 
   0  -2   0  148.52    3.98 
   0   2   0  148.15    3.78 
  -1  -2   0  302.82    7.62 
   1   2   0  290.98    6.54 
   1   2   0  308.07    7.93 
   1   2   0  296.71    7.29 
   2   2   0    6.02    1.76 
   2   2   0    6.39    1.27 
   2   2   0    4.32    0.91 
   3   2   0  170.51    6.37 
   3   2   0  171.85    5.05 
   4   2   0    8.80    2.21 
   4   2   0   12.51    1.52 
  -5  -2   0    7.66    1.87 
   5   2   0   10.64    1.58 
   5   2   0    6.01    2.23 
  -6  -2   0   16.93    2.65 
   6   2   0   15.29    3.20 
   6   2   0   15.65    1.78 
  -7  -2   0   -0.54    1.86 
   7   2   0   -0.27    0.97 
   7   2   0   -0.09    1.97 
  -8  -2   0   12.04    2.98 
   8   2   0   10.52    3.65 
   8   2   0   14.76    2.00 
  -9  -2   0   -0.83    2.50 
   9   2   0   -0.69    2.87 
   9   2   0    0.99    1.27 
 -10  -2   0   29.59    4.18 
  10   2   0   28.91    2.41 
  10   2   0   31.78    5.62 
 -11  -2   0   11.08    3.43 
  11   2   0   10.74    4.21 
 -12  -2   0    1.99    3.07 
  12   2   0    4.20    4.30 
 -13  -2   0    0.88    3.09 
  13   2   0    4.19    3.86 
  13  -3   0    7.50    4.25 
  13  -3   0    4.75    3.52 
 -13   3   0    1.27    3.30 
  12  -3   0   19.37    5.13 
  12  -3   0   21.39    5.44 
 -12   3   0   30.52    5.60 
  11  -3   0   12.89    4.14 
  11  -3   0   18.30    4.55 
 -11   3   0    5.39    3.37 
  10  -3   0    8.84    3.70 
  10  -3   0   14.15    4.00 
 -10   3   0    8.72    3.53 
   9  -3   0    8.92    3.37 
   9  -3   0    5.62    3.26 
  -9   3   0   11.43    3.69 
   8  -3   0   12.06    3.42 
   8  -3   0    5.69    3.12 
  -8   3   0    2.96    2.85 
   7  -3   0   36.69    3.97 
   7  -3   0   29.17    3.95 
  -7   3   0   26.04    3.90 
   6  -3   0  100.60    5.63 
   6  -3   0  107.51    6.10 
  -6   3   0  103.67    5.85 
   5  -3   0   14.34    2.95 
   5  -3   0   13.18    2.57 
  -5   3   0   15.11    2.76 
   4  -3   0   95.72    5.05 
   4  -3   0   95.40    4.68 
  -4   3   0  101.74    4.90 
  -4   3   0   96.95    2.65 
   3  -3   0    4.26    1.67 
   3  -3   0    6.60    2.03 
  -3   3   0    7.55    1.01 
  -3   3   0    6.58    1.98 
   2  -3   0    1.38    1.78 
   2  -3   0    4.57    1.37 
  -2   3   0    3.86    0.96 
  -2   3   0    2.43    1.54 
   1  -3   0   72.01    3.76 
   1  -3   0   68.61    3.05 
  -1   3   0   69.74    3.24 
  -1   3   0   72.55    2.79 
   0  -3   0  791.31   17.11 
   0  -3   0  756.86   18.08 
   0   3   0  787.95   16.82 
   0   3   0  767.22   17.20 
  -1  -3   0  100.81    4.06 
   1   3   0   87.81    3.58 
   1   3   0   91.70    2.81 
  -2  -3   0    2.05    1.92 
   2   3   0    1.66    1.46 
   2   3   0    3.36    0.80 
   2   3   0    3.46    1.19 
   3   3   0  115.96    5.49 
   3   3   0  124.45    3.74 
   3   3   0  134.67    4.59 
   4   3   0    4.18    1.97 
   4   3   0    5.57    1.50 
   5   3   0  120.39    6.30 
   5   3   0  118.49    4.62 
  -6  -3   0   40.68    3.18 
   6   3   0   41.21    2.87 
   6   3   0   46.24    4.37 
  -7  -3   0   20.94    3.00 
   7   3   0   19.19    2.34 
   7   3   0   25.53    3.98 
  -8  -3   0    0.15    2.34 
   8   3   0    3.10    2.62 
   8   3   0    0.67    1.26 
  -9  -3   0   39.94    4.22 
   9   3   0   32.83    2.86 
   9   3   0   35.70    5.29 
 -10  -3   0    4.79    2.76 
  10   3   0    5.41    3.22 
  10   3   0    5.57    1.89 
 -11  -3   0    3.09    2.86 
  11   3   0   10.57    4.20 
 -12  -3   0   -0.69    2.75 
  12   3   0   -0.78    2.77 
  13   3   0   14.89    4.98 
  13  -4   0    3.05    3.61 
  13  -4   0    1.50    3.07 
 -13   4   0   -2.93    2.90 
  12  -4   0    3.51    3.34 
  12  -4   0    1.93    3.26 
 -12   4   0    2.53    3.58 
  11  -4   0   -1.05    2.78 
  11  -4   0    5.45    3.21 
 -11   4   0    2.33    2.98 
  10  -4   0   28.55    4.72 
  10  -4   0   23.75    4.78 
 -10   4   0   33.57    4.88 
   9  -4   0    2.54    2.96 
   9  -4   0   -0.23    2.30 
  -9   4   0    1.50    3.14 
   8  -4   0    5.15    2.77 
   8  -4   0   10.68    3.46 
  -8   4   0   -0.91    2.63 
   7  -4   0    4.07    2.43 
   7  -4   0    2.27    2.36 
  -7   4   0    1.65    2.68 
   6  -4   0    3.04    2.03 
   6  -4   0    1.28    2.13 
  -6   4   0   -1.37    1.91 
   5  -4   0    0.60    2.06 
   5  -4   0    0.58    1.55 
  -5   4   0    1.06    1.92 
  -5   4   0   -0.35    0.58 
   4  -4   0   22.39    2.86 
   4  -4   0   26.17    2.61 
  -4   4   0   19.63    1.41 
  -4   4   0   20.52    2.76 
   3  -4   0  148.13    5.37 
   3  -4   0  138.08    5.74 
  -3   4   0  132.80    4.22 
  -3   4   0  149.29    5.74 
   2  -4   0  104.54    4.10 
   2  -4   0  104.54    4.77 
  -2   4   0  102.50    4.41 
  -2   4   0   96.76    3.60 
   1  -4   0   -1.18    1.12 
   1  -4   0    1.34    1.93 
  -1   4   0    1.59    1.30 
  -1   4   0   -0.19    0.94 
   0  -4   0  102.12    4.94 
   0  -4   0  112.73    4.14 
   0   4   0  108.16    4.05 
   0   4   0  108.33    3.74 
  -1  -4   0    4.87    1.87 
   1   4   0    2.06    1.18 
   1   4   0    5.66    1.09 
  -2  -4   0   37.52    3.10 
   2   4   0   32.47    1.68 
   2   4   0   36.76    2.54 
   2   4   0   35.00    3.21 
  -3  -4   0  149.62    6.33 
   3   4   0  138.03    5.25 
   3   4   0  152.24    4.25 
   3   4   0  149.20    6.57 
  -4  -4   0    5.87    2.54 
   4   4   0    4.17    1.48 
   4   4   0    3.41    1.06 
   4   4   0    3.85    1.97 
   5   4   0   90.43    4.24 
   5   4   0   78.70    5.32 
  -6  -4   0   19.52    2.41 
   6   4   0   14.29    3.13 
   6   4   0   18.02    2.35 
  -7  -4   0    0.71    1.94 
   7   4   0    1.72    2.54 
   7   4   0    0.22    1.43 
  -8  -4   0   59.46    4.46 
   8   4   0   64.69    6.24 
   8   4   0   65.59    4.05 
  -9  -4   0   -3.94    2.04 
   9   4   0   -1.31    1.29 
   9   4   0   -0.12    2.73 
 -10  -4   0   17.47    3.52 
  10   4   0   18.74    4.66 
  10   4   0   22.13    2.76 
 -11  -4   0    5.15    2.80 
  11   4   0    4.44    3.32 
  12   4   0    1.81    3.55 
  13   4   0   -3.03    2.81 
  13  -5   0    3.14    3.72 
  13  -5   0    5.53    4.01 
 -13   5   0   -1.13    3.19 
  12  -5   0    1.05    3.15 
  12  -5   0   -1.88    2.75 
 -12   5   0   -2.87    2.73 
  11  -5   0    3.61    3.21 
  11  -5   0    2.72    3.09 
 -11   5   0    0.60    3.16 
  10  -5   0   14.12    3.82 
  10  -5   0   10.59    3.94 
 -10   5   0   20.60    4.52 
   9  -5   0   30.40    4.70 
   9  -5   0   31.19    4.88 
  -9   5   0   28.76    5.01 
   8  -5   0    1.00    2.67 
   8  -5   0   -0.81    2.27 
  -8   5   0    1.45    2.92 
   7  -5   0   -1.56    1.83 
   7  -5   0   -2.48    2.19 
  -7   5   0   -1.79    2.35 
   6  -5   0    5.18    2.30 
   6  -5   0    2.59    2.35 
  -6   5   0    5.59    0.97 
  -6   5   0    5.73    2.57 
   5  -5   0    0.81    1.67 
   5  -5   0    3.92    2.34 
  -5   5   0    6.53    2.42 
  -5   5   0    6.04    1.15 
   4  -5   0   20.79    3.41 
   4  -5   0   18.89    2.58 
  -4   5   0   21.28    1.78 
  -4   5   0   17.37    2.95 
   3  -5   0    7.64    1.83 
   3  -5   0    7.59    2.41 
  -3   5   0    6.55    2.03 
  -3   5   0   10.32    1.58 
   2  -5   0  106.14    5.24 
   2  -5   0  107.10    4.43 
  -2   5   0  104.33    4.72 
  -2   5   0  105.39    4.11 
   1  -5   0    7.45    1.78 
   1  -5   0    6.88    2.32 
  -1   5   0    9.45    1.69 
  -1   5   0    6.53    1.64 
   0  -5   0    4.34    2.19 
   0  -5   0    4.28    1.80 
   0   5   0    6.46    1.57 
   0   5   0    3.17    1.23 
  -1  -5   0   -1.83    1.83 
   1   5   0    2.09    0.98 
   1   5   0   -0.65    1.05 
  -2  -5   0   17.93    2.94 
   2   5   0   18.65    1.46 
   2   5   0   24.17    2.30 
  -3  -5   0   49.36    4.13 
   3   5   0   50.57    4.10 
   3   5   0   57.49    2.34 
   3   5   0   54.55    3.40 
  -4  -5   0    8.03    2.80 
   4   5   0   12.02    1.57 
   4   5   0    6.74    2.53 
   4   5   0    9.59    1.98 
  -5  -5   0   47.42    4.81 
   5   5   0   47.77    3.37 
   5   5   0   44.39    4.45 
  -6  -5   0   -0.01    3.11 
   6   5   0    1.77    1.48 
   6   5   0   -1.38    1.71 
  -7  -5   0   26.89    5.55 
  -7  -5   0   18.92    2.82 
   7   5   0   19.35    2.84 
   7   5   0   11.07    3.42 
  -8  -5   0   10.06    2.60 
   8   5   0   10.76    2.37 
   8   5   0    5.37    3.01 
  -9  -5   0    3.36    2.28 
   9   5   0    3.70    1.73 
   9   5   0   -0.68    2.38 
 -10  -5   0   22.02    3.69 
  10   5   0   23.16    2.92 
  10   5   0   17.10    4.66 
 -11  -5   0    4.04    4.68 
  11   5   0    7.03    3.73 
  11   5   0    4.05    2.08 
 -12  -5   0    0.09    4.43 
  12   5   0   -3.51    2.72 
  13  -6   0   10.86    4.76 
  13  -6   0    4.31    3.86 
 -13   6   0    8.66    4.68 
  12  -6   0   13.28    4.58 
  12  -6   0   13.69    4.67 
 -12   6   0   22.21    5.11 
  11  -6   0    1.74    2.70 
  11  -6   0    1.30    3.16 
 -11   6   0    3.45    3.10 
  10  -6   0    1.19    2.82 
  10  -6   0   -2.21    2.13 
 -10   6   0    0.11    2.58 
   9  -6   0    2.06    2.61 
   9  -6   0    1.52    2.53 
  -9   6   0    0.63    2.68 
   8  -6   0   -3.49    2.14 
   8  -6   0    3.13    2.65 
  -8   6   0    4.22    3.20 
   7  -6   0   26.19    4.65 
   7  -6   0   39.28    4.36 
  -7   6   0   32.18    4.65 
  -7   6   0   30.95    1.74 
   6  -6   0   22.40    4.33 
   6  -6   0   31.49    3.64 
  -6   6   0   24.31    1.85 
  -6   6   0   28.76    4.38 
   5  -6   0    5.29    2.18 
   5  -6   0    3.85    2.53 
  -5   6   0    3.41    2.32 
  -5   6   0    7.85    1.52 
   4  -6   0   28.64    3.66 
   4  -6   0   29.59    2.96 
  -4   6   0   25.66    3.29 
  -4   6   0   28.58    2.20 
   3  -6   0  107.10    4.83 
   3  -6   0  100.40    5.70 
  -3   6   0   97.68    5.10 
  -3   6   0   93.58    4.08 
   2  -6   0    1.35    1.41 
   2  -6   0    1.27    1.98 
  -2   6   0   -1.18    1.21 
  -2   6   0   -0.56    0.90 
   1  -6   0  141.62    5.46 
   1  -6   0  150.16    6.89 
  -1   6   0  154.63    5.56 
  -1   6   0  155.28    5.72 
   0  -6   0   98.22    4.50 
   0  -6   0   96.76    5.57 
   0   6   0  100.41    3.96 
   0   6   0   97.60    4.52 
  -1  -6   0   17.20    2.69 
   1   6   0   15.69    2.12 
   1   6   0   17.54    1.69 
  -2  -6   0  154.99    6.67 
   2   6   0  171.45    4.91 
   2   6   0  159.78    6.31 
  -3  -6   0   17.26    3.23 
   3   6   0   13.63    3.11 
   3   6   0   17.47    2.30 
   3   6   0   15.21    1.49 
  -4  -6   0   88.61    5.80 
   4   6   0   86.88    4.69 
   4   6   0   76.45    5.59 
   4   6   0   84.71    3.21 
  -5  -6   0   46.34    5.08 
   5   6   0   52.30    2.60 
   5   6   0   42.77    4.64 
   5   6   0   47.47    3.75 
  -6  -6   0   13.89    4.39 
   6   6   0   11.79    2.69 
   6   6   0   14.75    3.71 
  -7  -6   0   -0.91    4.05 
  -7  -6   0   -3.11    1.60 
   7   6   0   -0.44    1.69 
   7   6   0   -0.65    2.31 
  -8  -6   0    6.49    2.35 
  -8  -6   0   12.53    5.01 
   8   6   0    2.57    2.00 
   8   6   0   -1.01    2.26 
  -9  -6   0   -5.38    3.28 
   9   6   0    2.75    2.68 
   9   6   0   -1.33    1.55 
 -10  -6   0    4.74    4.50 
  10   6   0   -1.34    2.27 
  10   6   0    2.17    1.93 
 -11  -6   0    1.39    4.82 
  11   6   0    0.53    3.16 
  11   6   0    0.90    1.84 
 -12  -6   0   -1.42    4.35 
  12   6   0   -2.48    2.59 
  12  -7   0   17.27    4.65 
  12  -7   0   10.50    4.05 
 -12   7   0    2.84    3.62 
  11  -7   0    1.99    3.48 
  11  -7   0    5.34    3.46 
 -11   7   0    6.46    3.68 
  10  -7   0    2.89    3.04 
  10  -7   0    2.05    3.18 
 -10   7   0    0.74    3.03 
   9  -7   0   84.36    7.05 
   9  -7   0   77.72    6.36 
  -9   7   0   77.27    6.71 
   8  -7   0   41.67    4.64 
   8  -7   0   44.24    5.63 
  -8   7   0   36.26    5.23 
   7  -7   0   11.68    3.86 
   7  -7   0    9.07    3.10 
  -7   7   0   10.65    1.60 
  -7   7   0   11.99    3.65 
   6  -7   0    4.36    3.00 
   6  -7   0   -0.70    1.85 
  -6   7   0   -0.68    2.41 
  -6   7   0   -0.18    0.99 
   5  -7   0    9.19    3.22 
   5  -7   0    1.75    1.88 
  -5   7   0    1.18    2.23 
  -5   7   0    2.59    1.28 
   4  -7   0   51.66    3.89 
   4  -7   0   50.45    4.79 
  -4   7   0   47.94    4.33 
  -4   7   0   56.90    3.24 
   3  -7   0    0.32    2.14 
   3  -7   0    0.67    1.56 
  -3   7   0   -0.06    1.19 
  -3   7   0    3.41    2.02 
   2  -7   0   18.57    3.41 
   2  -7   0   18.34    2.52 
  -2   7   0   17.77    2.28 
  -2   7   0   17.28    2.67 
   1  -7   0  104.78    4.89 
   1  -7   0   94.14    5.94 
  -1   7   0  106.33    4.93 
  -1   7   0  105.60    4.74 
   0  -7   0    6.69    2.08 
   0  -7   0    3.43    2.77 
   0   7   0    7.40    1.63 
   0   7   0    6.12    1.85 
  -1  -7   0   -0.43    2.32 
  -1  -7   0   -0.40    1.79 
   1   7   0   -1.38    0.86 
   1   7   0   -0.26    1.35 
  -2  -7   0    5.06    2.59 
   2   7   0    2.97    1.66 
   2   7   0    3.84    1.27 
  -3  -7   0   15.48    3.69 
   3   7   0   20.40    2.62 
   3   7   0   14.48    1.61 
  -4  -7   0  124.87    6.93 
   4   7   0  125.75    4.24 
   4   7   0  118.03    7.30 
   4   7   0  129.17    6.16 
  -5  -7   0    3.49    3.33 
   5   7   0    3.46    1.93 
   5   7   0    5.78    2.86 
   5   7   0   10.43    1.60 
  -6  -7   0    5.58    3.98 
   6   7   0    5.33    2.87 
   6   7   0    4.43    2.15 
  -7  -7   0   14.74    4.74 
   7   7   0   10.56    3.62 
   7   7   0   16.74    3.22 
  -8  -7   0   24.62    6.00 
   8   7   0   12.97    3.60 
   8   7   0   18.28    3.27 
  -9  -7   0   -0.86    3.73 
   9   7   0   -0.52    2.51 
   9   7   0    2.92    1.97 
 -10  -7   0   -0.38    4.04 
  10   7   0   -0.92    2.69 
  10   7   0    1.02    1.65 
 -11  -7   0   -2.37    4.04 
  11   7   0   -1.12    1.57 
  11   7   0    4.14    3.43 
 -12  -7   0   -2.25    4.55 
  12   7   0   -0.86    3.11 
  12  -8   0    8.65    4.07 
  12  -8   0   -3.04    2.72 
 -12   8   0    0.14    3.51 
  11  -8   0    0.22    3.30 
  11  -8   0   -1.01    2.98 
 -11   8   0    2.37    3.43 
  10  -8   0    2.79    2.82 
  10  -8   0    3.53    3.45 
 -10   8   0    1.67    3.10 
   9  -8   0    0.60    2.67 
   9  -8   0    4.48    3.06 
  -9   8   0    2.98    3.47 
   8  -8   0   15.53    3.71 
   8  -8   0   18.66    4.56 
  -8   8   0   15.05    4.08 
   7  -8   0   23.79    4.99 
   7  -8   0   26.47    4.34 
  -7   8   0   13.53    3.72 
  -7   8   0   19.79    2.14 
   6  -8   0    2.28    2.50 
   6  -8   0    5.14    3.51 
  -6   8   0    2.01    1.46 
  -6   8   0   -3.04    2.33 
   5  -8   0    1.33    2.04 
   5  -8   0   -1.23    2.60 
  -5   8   0    2.47    2.74 
  -5   8   0    3.59    1.63 
   4  -8   0    6.62    3.52 
   4  -8   0   11.13    2.72 
  -4   8   0   11.96    2.37 
  -4   8   0   12.35    3.26 
   3  -8   0   39.99    3.55 
   3  -8   0   39.50    4.82 
  -3   8   0   40.88    3.24 
  -3   8   0   41.42    4.04 
   2  -8   0   -1.53    2.28 
   2  -8   0   -0.73    1.76 
  -2   8   0   -1.85    1.39 
  -2   8   0    0.03    1.38 
   1  -8   0   -2.91    2.11 
   1  -8   0   -0.82    1.73 
  -1   8   0    3.55    1.75 
  -1   8   0   -1.38    1.16 
   0  -8   0   19.11    3.12 
   0  -8   0   13.03    3.53 
   0   8   0   18.79    2.30 
   0   8   0   14.37    2.70 
  -1  -8   0    7.80    2.65 
  -1  -8   0    6.81    3.17 
   1   8   0   12.85    1.92 
   1   8   0   11.11    2.46 
  -2  -8   0    1.40    2.76 
   2   8   0    0.69    1.56 
   2   8   0   -0.66    1.02 
  -3  -8   0  152.21    7.62 
   3   8   0  150.48    6.96 
   3   8   0  152.73    5.00 
  -4  -8   0   31.08    5.02 
   4   8   0   29.14    2.18 
   4   8   0   31.36    3.60 
  -5  -8   0   59.84    6.19 
   5   8   0   64.91    6.30 
   5   8   0   72.86    4.95 
   5   8   0   63.68    3.09 
  -6  -8   0   19.75    4.76 
   6   8   0   22.42    3.66 
   6   8   0   16.06    4.43 
  -7  -8   0    1.61    3.70 
   7   8   0    4.73    2.48 
   7   8   0   10.53    3.82 
  -8  -8   0   37.31    6.07 
   8   8   0   37.44    4.09 
   8   8   0   25.71    5.43 
  -9  -8   0    4.37    4.40 
   9   8   0   -1.68    2.59 
   9   8   0    0.14    1.94 
 -10  -8   0    4.73    5.08 
  10   8   0    6.53    3.64 
  10   8   0    8.54    2.81 
 -11  -8   0    3.59    4.87 
  11   8   0    2.37    3.26 
  11   8   0   -0.02    1.74 
  11  -9   0   -3.75    2.04 
  11  -9   0    8.29    3.97 
 -11   9   0    1.89    3.55 
  10  -9   0    1.19    3.02 
  10  -9   0    4.43    3.28 
 -10   9   0   -2.58    2.48 
   9  -9   0   16.88    4.36 
   9  -9   0   18.52    4.91 
  -9   9   0   16.62    4.43 
   8  -9   0   13.12    4.36 
   8  -9   0   11.90    3.69 
  -8   9   0   10.50    3.85 
   7  -9   0    0.57    2.00 
   7  -9   0   -2.49    2.63 
  -7   9   0   -1.84    1.09 
  -7   9   0   -2.39    2.29 
   6  -9   0    5.27    2.69 
   6  -9   0    6.91    3.82 
  -6   9   0   11.81    2.33 
  -6   9   0    6.60    3.37 
   5  -9   0    1.56    2.47 
   5  -9   0    4.78    3.15 
  -5   9   0   -2.34    2.39 
  -5   9   0    1.73    1.52 
   4  -9   0  109.48    5.86 
   4  -9   0  116.82    7.74 
  -4   9   0  116.90    6.70 
  -4   9   0  109.09    5.42 
   3  -9   0   -1.20    1.79 
   3  -9   0    1.73    2.89 
  -3   9   0   -1.01    1.60 
  -3   9   0    3.47    2.42 
   2  -9   0    9.39    3.58 
   2  -9   0    0.38    1.87 
  -2   9   0    4.77    2.01 
  -2   9   0   -0.35    1.80 
   1  -9   0   17.42    3.16 
   1  -9   0   12.56    4.16 
  -1   9   0   16.33    2.77 
  -1   9   0   20.36    3.17 
   0  -9   0   -2.41    2.00 
   0  -9   0    4.00    3.46 
   0   9   0    1.09    1.74 
   0   9   0    2.66    1.58 
  -1  -9   0   94.34    5.76 
  -1  -9   0   67.70    6.87 
   1   9   0   95.90    4.32 
   1   9   0  100.69    5.77 
  -2  -9   0   58.10    5.19 
   2   9   0   53.52    4.51 
   2   9   0   56.43    3.27 
  -3  -9   0   13.29    4.05 
   3   9   0   12.61    1.88 
   3   9   0    8.32    2.60 
  -4  -9   0   13.44    4.64 
   4   9   0   16.27    1.97 
   4   9   0   14.90    3.15 
  -5  -9   0   11.17    4.58 
   5   9   0   10.05    3.01 
   5   9   0   11.07    1.74 
  -6  -9   0    7.45    4.15 
   6   9   0   13.66    3.29 
   6   9   0   10.02    3.78 
  -7  -9   0   10.72    4.54 
   7   9   0   16.15    3.43 
   7   9   0   14.68    4.29 
  -8  -9   0    0.53    3.50 
   8   9   0   -2.85    2.46 
   8   9   0    1.18    2.17 
  -9  -9   0    2.44    3.89 
   9   9   0    0.32    2.59 
   9   9   0   -2.27    1.76 
 -10  -9   0    0.24    4.12 
  10   9   0    2.52    2.35 
  10   9   0    1.65    3.44 
 -11  -9   0   -1.16    4.29 
  11   9   0   -0.29    2.98 
  11   9   0   -0.12    2.11 
  11 -10   0    1.29    3.10 
  11 -10   0    5.26    3.74 
 -11  10   0   11.63    4.20 
  10 -10   0    0.11    3.28 
  10 -10   0    3.04    3.07 
 -10  10   0   -0.71    2.64 
   9 -10   0   13.71    4.01 
   9 -10   0   16.42    5.00 
  -9  10   0   11.21    4.23 
   8 -10   0    0.14    2.30 
   8 -10   0    1.79    3.47 
  -8  10   0    4.66    3.54 
   7 -10   0   -0.65    2.62 
   7 -10   0    4.51    2.50 
  -7  10   0   -3.86    2.11 
  -7  10   0   -0.29    1.37 
   6 -10   0    4.01    3.44 
   6 -10   0    5.81    2.74 
  -6  10   0    4.89    2.97 
  -6  10   0   10.40    2.38 
   5 -10   0   22.02    5.04 
   5 -10   0   24.01    3.60 
  -5  10   0   22.02    2.93 
  -5  10   0   20.68    4.25 
   4 -10   0   36.84    5.61 
   4 -10   0   24.35    3.48 
  -4  10   0   21.30    4.08 
  -4  10   0   27.02    3.47 
   3 -10   0    2.11    3.28 
   3 -10   0    4.75    2.44 
  -3  10   0    4.82    2.19 
  -3  10   0    4.20    2.56 
   2 -10   0    1.17    2.26 
   2 -10   0    1.43    3.47 
  -2  10   0   -0.12    1.70 
  -2  10   0    0.35    2.23 
   1 -10   0   -1.54    3.30 
   1 -10   0    2.76    2.37 
  -1  10   0    0.59    1.97 
  -1  10   0   -1.76    1.68 
   0 -10   0   23.99    3.86 
   0 -10   0   23.26    5.44 
   0  10   0   26.62    3.03 
   0  10   0   20.78    3.57 
  -1 -10   0   32.88    4.53 
  -1 -10   0   27.18    5.62 
   1  10   0   28.28    2.90 
   1  10   0   37.23    3.99 
  -2 -10   0    4.17    3.33 
  -2 -10   0    4.64    3.95 
   2  10   0   -3.02    1.38 
   2  10   0   -0.85    1.17 
  -3 -10   0    6.19    3.65 
   3  10   0    1.74    2.14 
   3  10   0    1.85    1.43 
  -4 -10   0   37.24    5.79 
   4  10   0   41.62    4.51 
   4  10   0   48.18    2.85 
  -5 -10   0   10.35    4.24 
   5  10   0   11.96    3.18 
  -6 -10   0    2.93    3.75 
   6  10   0    1.52    2.00 
  -7 -10   0    6.95    4.25 
   7  10   0    6.65    2.96 
  -8 -10   0    0.35    3.97 
   8  10   0    7.72    2.78 
   8  10   0    1.56    3.59 
  -9 -10   0   17.89    5.70 
   9  10   0   20.85    5.58 
   9  10   0   20.53    3.96 
 -10 -10   0   -4.89    3.87 
  10  10   0   -0.90    3.87 
  10  10   0    3.15    2.61 
  10 -11   0    2.39    3.86 
  10 -11   0    1.93    3.06 
 -10  11   0   -1.02    2.99 
   9 -11   0   -0.85    2.95 
   9 -11   0    3.31    3.07 
  -9  11   0    5.83    3.65 
   8 -11   0   12.21    3.50 
   8 -11   0    7.12    4.37 
  -8  11   0    6.45    3.57 
   7 -11   0    6.62    3.76 
   7 -11   0    8.20    2.86 
  -7  11   0    0.93    1.77 
  -7  11   0   -0.24    2.76 
   6 -11   0   -0.10    2.25 
   6 -11   0    1.34    2.93 
  -6  11   0    6.18    3.07 
  -6  11   0   -1.62    1.59 
   5 -11   0   20.20    5.08 
   5 -11   0   21.23    3.82 
  -5  11   0   15.29    2.95 
  -5  11   0   15.79    3.73 
   4 -11   0   28.05    5.55 
   4 -11   0   38.16    4.03 
  -4  11   0   28.52    3.51 
  -4  11   0   28.30    4.11 
   3 -11   0   65.10    4.64 
   3 -11   0   44.58    5.84 
  -3  11   0   59.32    4.79 
  -3  11   0   59.91    5.15 
   2 -11   0   10.89    3.13 
   2 -11   0   -1.18    3.26 
  -2  11   0    4.73    2.39 
  -2  11   0    3.24    2.24 
   1 -11   0   -0.11    3.85 
   1 -11   0   -0.53    2.34 
  -1  11   0    0.84    1.87 
  -1  11   0    2.81    2.04 
   0 -11   0    4.57    3.56 
   0 -11   0    8.39    3.01 
   0  11   0   11.53    3.03 
   0  11   0    7.42    2.19 
  -1 -11   0   38.48    6.64 
  -1 -11   0   47.74    5.01 
   1  11   0   43.94    3.35 
   1  11   0   41.90    4.48 
  -2 -11   0   14.73    3.95 
  -2 -11   0    2.37    3.81 
   2  11   0   11.74    3.13 
   2  11   0   15.39    2.48 
  -3 -11   0    4.44    3.11 
  -3 -11   0    8.05    4.47 
   3  11   0    8.52    2.74 
   3  11   0   10.93    2.04 
  -4 -11   0    2.41    3.20 
   4  11   0   -0.38    1.79 
  -5 -11   0   -1.68    3.25 
   5  11   0    2.83    2.46 
  -6 -11   0    1.14    3.60 
   6  11   0   -3.52    1.78 
  -7 -11   0   -0.82    3.62 
   7  11   0    7.58    3.02 
  -8 -11   0    2.69    4.27 
   8  11   0    3.54    2.69 
  -9 -11   0    3.11    4.70 
   9  11   0    3.21    2.65 
   9 -12   0   -0.88    2.97 
   9 -12   0   -4.67    3.18 
  -9  12   0   -0.88    3.14 
   8 -12   0   -2.08    2.88 
   8 -12   0    2.03    2.98 
  -8  12   0    2.90    3.55 
   7 -12   0   -1.46    2.23 
   7 -12   0    4.35    3.80 
  -7  12   0   -2.48    2.46 
   6 -12   0    0.10    2.43 
   6 -12   0    2.11    3.57 
  -6  12   0   -0.59    2.55 
  -6  12   0    0.83    1.83 
   5 -12   0    4.91    3.85 
   5 -12   0   11.29    3.40 
  -5  12   0    9.89    2.86 
  -5  12   0    4.72    2.69 
   4 -12   0    5.47    3.59 
   4 -12   0    3.97    2.48 
  -4  12   0    8.63    3.08 
  -4  12   0   11.97    2.97 
   3 -12   0   10.13    2.88 
   3 -12   0    9.86    4.06 
  -3  12   0    6.47    2.55 
  -3  12   0    4.67    2.40 
   2 -12   0    3.06    2.17 
   2 -12   0   -1.28    2.95 
  -2  12   0   -0.32    1.78 
  -2  12   0    1.20    2.20 
   1 -12   0    7.16    2.80 
   1 -12   0   12.44    4.63 
  -1  12   0    6.78    2.35 
  -1  12   0    9.16    2.87 
   0 -12   0   -1.10    2.10 
   0 -12   0    1.39    3.34 
   0  12   0   -2.59    1.67 
   0  12   0   -1.16    1.60 
  -1 -12   0   18.32    4.03 
  -1 -12   0   18.40    5.39 
   1  12   0   12.72    3.17 
   1  12   0   19.16    2.71 
  -2 -12   0   40.78    5.19 
  -2 -12   0   37.68    6.91 
   2  12   0   31.05    2.88 
   2  12   0   33.33    4.29 
  -3 -12   0    2.73    3.20 
  -3 -12   0    0.06    3.46 
   3  12   0    4.54    2.46 
  -4 -12   0   -0.25    3.51 
   4  12   0    2.47    2.59 
  -5 -12   0    0.46    3.82 
   5  12   0    4.15    2.74 
  -6 -12   0   12.99    4.90 
   6  12   0    4.55    2.84 
  -7 -12   0    6.43    4.27 
   7  12   0    8.61    3.37 
  -8 -12   0    8.19    4.75 
   8  12   0    3.00    2.47 
   8 -13   0    0.00    3.39 
  -8  13   0    2.57    3.46 
   7 -13   0    1.97    3.65 
  -7  13   0   -1.23    2.54 
   6 -13   0    6.69    3.88 
  -6  13   0    2.21    2.20 
  -6  13   0   -0.50    2.52 
   5 -13   0    0.97    3.70 
  -5  13   0   -3.41    1.61 
  -5  13   0   -4.02    1.90 
   4 -13   0    8.60    4.14 
  -4  13   0    1.96    2.16 
  -4  13   0    1.01    1.89 
   3 -13   0    1.61    3.86 
  -3  13   0    0.64    1.84 
  -3  13   0   -0.09    2.32 
   2 -13   0   -1.33    3.47 
  -2  13   0   -2.24    1.62 
  -2  13   0    1.11    2.17 
   1 -13   0    3.45    3.82 
  -1  13   0   -0.09    2.38 
  -1  13   0    3.43    2.31 
   0 -13   0   -2.54    4.01 
   0  13   0    3.23    1.78 
   0  13   0    2.60    2.35 
  -1 -13   0    3.86    4.73 
   1  13   0    0.84    1.65 
   1  13   0    5.28    2.86 
  -2 -13   0    4.24    3.39 
  -2 -13   0    2.34    4.07 
   2  13   0   -0.98    2.30 
  -3 -13   0    6.03    4.75 
  -3 -13   0    6.74    3.80 
   3  13   0    2.89    2.42 
  -4 -13   0    0.07    3.45 
  -4 -13   0    1.32    4.37 
   4  13   0    3.83    2.82 
  -5 -13   0    1.73    3.71 
   5  13   0    0.22    2.31 
  -6 -13   0    6.01    4.37 
   6  13   0    5.15    2.82 
  -7 -13   0   -1.91    4.16 
   7  13   0    1.74    2.57 
   6 -14   0   -5.73    2.45 
  -6  14   0    1.23    2.46 
  -6  14   0    0.51    2.08 
   5 -14   0  -11.20    2.62 
  -5  14   0    0.68    2.26 
  -5  14   0    1.34    2.13 
   4 -14   0    7.97    4.31 
  -4  14   0   -0.17    2.08 
  -4  14   0   -1.51    1.89 
   3 -14   0    1.53    3.75 
  -3  14   0    1.63    2.39 
  -3  14   0   -0.67    2.10 
   2 -14   0   -1.22    3.35 
  -2  14   0   -0.72    2.05 
  -2  14   0    0.08    2.18 
   1 -14   0   -0.07    3.98 
  -1  14   0    1.18    2.81 
  -1  14   0   -0.15    1.90 
   0 -14   0   13.99    5.43 
   0  14   0    5.88    2.23 
   0  14   0   13.10    3.82 
  -1 -14   0   13.87    5.48 
   1  14   0   11.68    3.52 
  -2 -14   0    0.32    4.50 
   2  14   0    2.37    2.59 
  -3 -14   0    8.89    5.01 
   3  14   0   14.06    3.94 
  -4 -14   0   10.67    5.40 
   4  14   0   15.36    4.09 
  -5 -14   0    7.89    5.05 
   5  14   0   12.44    3.84 
   4 -15   0    3.72    3.91 
  -4  15   0   -0.20    2.66 
  -4  15   0    4.83    2.64 
   3 -15   0    4.69    4.79 
  -3  15   0   -0.18    2.08 
  -3  15   0    5.36    2.88 
   2 -15   0   34.18    6.93 
  -2  15   0   15.27    3.49 
  -2  15   0   19.18    4.45 
   1 -15   0    1.11    4.07 
  -1  15   0    4.27    2.26 
  -1  15   0    1.19    2.56 
   0 -15   0    9.34    5.32 
   0  15   0   25.05    4.70 
  -1 -15   0    4.17    4.55 
   1  15   0    4.76    2.89 
  -2 -15   0    3.79    5.01 
   2  15   0    4.08    3.37 
  -3 -15   0    6.54    5.42 
   3  15   0    7.61    3.44 
   2  15  -1   14.36    4.35 
  -2 -15   1   17.62    6.28 
   1  15  -1    1.21    2.40 
  -1 -15   1   -4.64    3.56 
   0  15  -1   -3.04    2.07 
   0 -15   1   -0.79    4.67 
  -1  15  -1    3.43    2.99 
   1 -15   1   -1.42    3.83 
  -2  15  -1    2.79    2.47 
  -2  15  -1    4.21    2.42 
   2 -15   1   -3.62    3.53 
  -3  15  -1    3.40    2.44 
  -3  15  -1    9.98    3.65 
   3 -15   1    9.84    5.01 
  -4  15  -1    0.80    2.27 
  -4  15  -1   -3.94    2.03 
   4 -15   1   -5.27    3.04 
   5  14  -1    2.05    2.71 
  -5 -14   1    0.19    4.87 
   4  14  -1    0.16    2.70 
  -4 -14   1    6.22    5.23 
   3  14  -1    7.89    3.51 
  -3 -14   1   20.05    6.27 
   2  14  -1    7.20    3.20 
  -2 -14   1    6.11    5.36 
   1  14  -1    6.87    2.89 
  -1 -14   1    5.09    4.57 
   0  14  -1    8.45    3.29 
   0 -14   1    8.12    5.53 
  -1  14  -1    4.22    2.86 
  -1  14  -1    3.69    2.02 
   1 -14   1   10.06    5.10 
  -2  14  -1   -3.19    1.96 
  -2  14  -1    4.72    2.59 
   2 -14   1   -2.39    3.61 
  -3  14  -1    9.18    3.45 
  -3  14  -1   10.41    3.07 
   3 -14   1    8.21    4.47 
  -4  14  -1    5.43    2.81 
  -4  14  -1   -0.85    1.92 
   4 -14   1    0.65    3.67 
  -5  14  -1   -0.69    2.12 
  -5  14  -1    1.54    2.74 
   5 -14   1    2.16    3.94 
  -6  14  -1    3.30    2.46 
  -6  14  -1    1.33    2.49 
   6 -14   1    1.35    3.34 
   6  13  -1   -0.01    2.55 
  -6 -13   1    1.17    3.73 
   5  13  -1   -2.66    1.95 
  -5 -13   1    3.92    3.83 
   4  13  -1    5.81    3.09 
  -4 -13   1   20.81    6.44 
  -4 -13   1   25.62    5.65 
   3  13  -1    5.56    2.98 
  -3 -13   1    0.91    4.59 
  -3 -13   1    1.08    3.56 
   2  13  -1    4.59    2.79 
  -2 -13   1    6.73    4.67 
  -2 -13   1    8.82    4.00 
   1  13  -1    0.30    2.07 
  -1 -13   1    3.71    3.29 
  -1 -13   1    2.66    4.44 
   0  13  -1    0.07    2.16 
   0  13  -1    6.16    1.99 
   0 -13   1    5.93    4.44 
   0 -13   1    1.86    2.71 
  -1  13  -1   11.35    2.61 
  -1  13  -1    8.48    3.26 
   1 -13   1   10.56    4.52 
   1 -13   1    8.95    3.41 
  -2  13  -1    3.92    2.27 
  -2  13  -1    9.00    3.14 
   2 -13   1    7.51    4.25 
   2 -13   1    5.20    3.05 
  -3  13  -1    2.93    2.17 
  -3  13  -1    0.00    2.09 
   3 -13   1    0.14    3.31 
   3 -13   1    2.08    2.61 
  -4  13  -1    0.87    2.25 
  -4  13  -1    3.66    2.85 
   4 -13   1    6.63    4.07 
   4 -13   1    0.86    2.43 
  -5  13  -1    0.20    2.19 
  -5  13  -1    8.87    2.88 
   5 -13   1    0.28    3.93 
   5 -13   1    3.86    2.86 
  -6  13  -1   -1.09    1.88 
  -6  13  -1    1.21    2.86 
   6 -13   1    1.91    2.82 
   6 -13   1    2.23    3.25 
  -7  13  -1    1.42    2.58 
   7 -13   1   -2.44    3.05 
   7 -13   1    0.52    2.64 
  -8  13  -1    0.71    2.87 
   8 -13   1    2.96    3.90 
   7  12  -1    1.06    2.57 
  -7 -12   1    2.68    4.28 
   6  12  -1    3.15    2.66 
  -6 -12   1    0.17    3.83 
   5  12  -1   -2.48    1.99 
  -5 -12   1    0.71    3.90 
   4  12  -1    1.05    2.22 
  -4 -12   1   12.54    4.32 
   3  12  -1    3.71    2.46 
  -3 -12   1    4.93    4.62 
  -3 -12   1    2.22    3.50 
   2  12  -1    4.62    2.59 
  -2 -12   1    6.34    3.85 
  -2 -12   1    2.81    4.30 
   1  12  -1    3.84    1.62 
   1  12  -1    1.54    2.35 
  -1 -12   1    4.44    3.17 
  -1 -12   1    2.55    3.38 
   0  12  -1    1.40    1.62 
   0  12  -1    0.22    1.89 
   0 -12   1    0.12    2.53 
   0 -12   1   -0.19    2.80 
  -1  12  -1   29.57    4.06 
  -1  12  -1   30.91    3.48 
   1 -12   1   35.28    4.54 
   1 -12   1   19.81    5.16 
  -2  12  -1    1.52    1.85 
  -2  12  -1   -0.53    1.73 
   2 -12   1    0.33    3.02 
   2 -12   1   -1.59    2.19 
  -3  12  -1   10.14    2.90 
  -3  12  -1   12.70    3.13 
   3 -12   1    5.28    3.98 
   3 -12   1    5.74    2.84 
  -4  12  -1    3.09    2.19 
  -4  12  -1    5.06    2.85 
   4 -12   1    1.87    2.45 
   4 -12   1    2.98    3.74 
  -5  12  -1   -2.16    1.87 
  -5  12  -1    1.05    2.63 
   5 -12   1    0.32    3.58 
   5 -12   1   -3.06    2.27 
  -6  12  -1    3.37    2.76 
  -6  12  -1    3.85    2.15 
   6 -12   1    4.28    2.83 
   6 -12   1    1.77    3.19 
  -7  12  -1   -2.93    2.46 
  -7  12  -1    1.27    2.05 
   7 -12   1   -0.13    3.26 
   7 -12   1    0.92    2.81 
  -8  12  -1    3.30    3.33 
   8 -12   1    2.18    3.91 
   8 -12   1    4.43    3.16 
  -9  12  -1    1.42    3.30 
   9 -12   1   -0.98    2.72 
   9 -12   1   10.53    4.40 
  -9 -11   1    6.17    5.36 
   8  11  -1    9.95    3.40 
  -8 -11   1   16.49    5.24 
   7  11  -1   14.73    3.70 
  -7 -11   1   13.65    5.02 
   6  11  -1   -1.00    2.42 
  -6 -11   1   -4.98    3.27 
   5  11  -1   12.16    3.43 
  -5 -11   1   11.83    4.76 
   4  11  -1    0.81    2.03 
  -4 -11   1    3.22    3.72 
   3  11  -1   22.08    3.81 
  -3 -11   1   14.29    4.01 
   2  11  -1    4.76    1.49 
   2  11  -1    4.41    2.25 
  -2 -11   1    3.97    4.30 
  -2 -11   1    6.84    3.49 
   1  11  -1    3.50    2.38 
   1  11  -1    6.07    1.77 
  -1 -11   1    1.51    3.02 
  -1 -11   1    8.26    4.63 
   0  11  -1    3.39    1.73 
   0  11  -1   -1.00    1.75 
   0 -11   1   -2.04    3.40 
   0 -11   1    4.54    3.22 
  -1  11  -1   67.10    4.56 
  -1  11  -1   69.06    5.22 
   1 -11   1   67.23    5.51 
   1 -11   1   67.63    7.04 
  -2  11  -1   14.26    3.05 
  -2  11  -1   17.50    3.40 
   2 -11   1    6.63    4.10 
   2 -11   1   13.18    3.34 
  -3  11  -1   13.80    3.17 
  -3  11  -1   16.37    3.36 
   3 -11   1   14.08    4.45 
   3 -11   1   13.82    3.45 
  -4  11  -1    8.97    2.57 
  -4  11  -1   16.02    3.73 
   4 -11   1    9.75    3.92 
   4 -11   1    6.69    2.66 
  -5  11  -1    1.78    2.58 
  -5  11  -1    1.27    1.73 
   5 -11   1    4.05    2.50 
   5 -11   1   -4.13    2.73 
  -6  11  -1   43.92    5.23 
  -6  11  -1   43.42    4.02 
   6 -11   1   39.26    4.50 
   6 -11   1   52.00    5.98 
  -7  11  -1   -1.82    1.48 
  -7  11  -1   -1.69    2.36 
   7 -11   1    4.65    2.72 
   7 -11   1   -4.22    2.53 
  -8  11  -1    1.08    3.30 
   8 -11   1   -0.88    3.25 
   8 -11   1    3.28    2.73 
  -9  11  -1   -1.83    2.85 
   9 -11   1   -0.37    2.89 
   9 -11   1    8.07    4.24 
 -10  11  -1   -0.53    3.46 
  10 -11   1    7.28    3.63 
  10 -11   1    1.76    3.53 
   9  10  -1   -0.52    3.06 
   9  10  -1    2.07    2.36 
  -9 -10   1   -3.08    4.40 
   8  10  -1    2.52    2.75 
   8  10  -1    2.25    3.33 
  -8 -10   1    4.33    4.56 
   7  10  -1    3.18    2.39 
   7  10  -1   -0.82    2.81 
  -7 -10   1   -3.60    3.53 
   6  10  -1   -1.67    2.03 
  -6 -10   1   -2.39    3.58 
   5  10  -1   27.87    3.89 
  -5 -10   1   19.66    4.79 
   4  10  -1   -1.44    1.62 
  -4 -10   1    3.37    3.90 
   3  10  -1    1.18    1.18 
   3  10  -1    4.49    2.32 
  -3 -10   1    3.65    3.30 
   2  10  -1   -0.79    1.25 
   2  10  -1    0.57    1.76 
  -2 -10   1    0.26    3.38 
  -2 -10   1   -6.06    3.70 
   1  10  -1    8.44    2.61 
   1  10  -1    3.50    1.56 
  -1 -10   1   13.11    4.84 
  -1 -10   1    7.02    3.57 
   0  10  -1    2.41    2.18 
   0  10  -1   -1.26    1.42 
   0 -10   1    3.16    3.04 
   0 -10   1    0.37    3.63 
  -1  10  -1    1.66    1.92 
  -1  10  -1    3.97    2.14 
   1 -10   1    5.48    2.81 
   1 -10   1    2.06    3.33 
  -2  10  -1   -0.36    1.85 
  -2  10  -1    1.36    2.07 
   2 -10   1    1.48    3.64 
   2 -10   1    3.83    2.65 
  -3  10  -1    9.45    3.18 
  -3  10  -1   19.35    3.33 
   3 -10   1   12.61    3.11 
   3 -10   1    7.80    4.08 
  -4  10  -1    8.87    2.51 
  -4  10  -1    1.38    2.79 
   4 -10   1   10.94    3.12 
   4 -10   1    3.34    3.41 
  -5  10  -1   16.65    2.99 
  -5  10  -1   12.64    3.55 
   5 -10   1   17.56    4.68 
   5 -10   1   17.29    3.53 
  -6  10  -1    0.96    1.56 
  -6  10  -1   -0.91    2.54 
   6 -10   1    0.85    2.81 
   6 -10   1    4.21    2.48 
  -7  10  -1    1.17    2.92 
  -7  10  -1    4.36    1.81 
   7 -10   1    0.70    2.91 
   7 -10   1   -0.67    2.25 
  -8  10  -1    9.17    3.71 
   8 -10   1    5.40    3.95 
   8 -10   1    5.14    3.03 
  -9  10  -1    3.14    3.40 
   9 -10   1    5.65    3.31 
   9 -10   1    0.86    2.87 
 -10  10  -1   14.77    4.53 
  10 -10   1    6.47    3.84 
  10 -10   1    9.96    4.01 
 -11  10  -1   11.34    4.48 
  11 -10   1   10.67    4.04 
  11 -10   1    3.40    3.38 
  10   9  -1    1.06    2.10 
  10   9  -1    3.57    3.61 
 -10  -9   1   -1.25    3.87 
   9   9  -1    2.25    2.31 
   9   9  -1    5.73    3.71 
  -9  -9   1   12.80    5.30 
   8   9  -1    0.32    1.95 
   8   9  -1    3.03    3.01 
  -8  -9   1   -0.68    3.85 
   7   9  -1    3.36    2.37 
   7   9  -1   -0.92    2.55 
  -7  -9   1    3.04    4.02 
   6   9  -1    6.10    2.38 
   6   9  -1    1.78    2.71 
  -6  -9   1    4.71    3.63 
   5   9  -1    1.37    1.90 
  -5  -9   1    0.58    3.56 
   4   9  -1   -0.28    1.75 
  -4  -9   1    1.24    3.65 
   3   9  -1    0.37    1.74 
   3   9  -1    1.39    1.03 
  -3  -9   1    0.22    3.58 
   2   9  -1   33.00    3.80 
   2   9  -1   29.73    2.33 
  -2  -9   1   35.38    4.87 
   1   9  -1   25.46    2.41 
   1   9  -1   21.18    3.21 
  -1  -9   1   30.40    5.43 
  -1  -9   1   26.13    4.39 
   0   9  -1    5.64    1.82 
   0   9  -1    3.33    2.11 
   0  -9   1   10.04    3.26 
   0  -9   1    6.55    3.70 
  -1   9  -1   22.32    2.91 
  -1   9  -1   16.29    3.08 
   1  -9   1   15.24    3.97 
   1  -9   1   19.57    3.56 
  -2   9  -1   16.75    2.99 
  -2   9  -1   11.31    2.66 
   2  -9   1   13.66    4.07 
   2  -9   1   19.80    3.49 
  -3   9  -1   16.18    3.38 
  -3   9  -1   17.68    2.97 
   3  -9   1   26.46    4.76 
   3  -9   1   18.87    3.51 
  -4   9  -1    2.46    1.76 
  -4   9  -1    4.32    2.94 
   4  -9   1   -0.43    2.12 
   4  -9   1   -1.64    2.83 
  -5   9  -1    1.43    2.74 
  -5   9  -1    0.15    1.61 
   5  -9   1    2.06    2.29 
   5  -9   1    2.28    3.39 
  -6   9  -1    0.20    1.52 
  -6   9  -1    1.37    2.86 
   6  -9   1   -3.13    2.00 
   6  -9   1   -3.05    2.76 
  -7   9  -1   20.43    2.42 
  -7   9  -1   16.57    4.07 
   7  -9   1   12.59    3.85 
   7  -9   1    5.10    2.91 
  -8   9  -1   -2.91    2.71 
   8  -9   1   -2.04    2.76 
   8  -9   1   -1.03    2.07 
  -9   9  -1    4.22    3.41 
   9  -9   1   11.12    4.24 
   9  -9   1    5.47    3.30 
 -10   9  -1   -4.28    2.45 
  10  -9   1    8.36    3.51 
  10  -9   1   -0.44    3.16 
 -11   9  -1    4.48    3.75 
  11  -9   1    8.58    3.87 
  11  -9   1    2.80    3.36 
  11   8  -1    5.62    3.90 
  11   8  -1    1.82    2.15 
 -11  -8   1    7.72    5.61 
  10   8  -1   -1.75    1.58 
  10   8  -1   -2.16    2.17 
 -10  -8   1    1.07    4.11 
   9   8  -1   13.83    3.41 
   9   8  -1   12.20    4.14 
  -9  -8   1   15.56    5.82 
   8   8  -1    6.15    3.60 
   8   8  -1   21.36    3.94 
  -8  -8   1   15.09    5.19 
   7   8  -1    3.62    2.79 
   7   8  -1    4.49    2.35 
  -7  -8   1    0.37    3.70 
   6   8  -1   13.06    4.00 
   6   8  -1   14.42    3.26 
  -6  -8   1   11.76    4.50 
   5   8  -1    2.81    1.95 
   5   8  -1    2.58    2.80 
  -5  -8   1   -3.95    3.21 
   4   8  -1   36.59    1.90 
   4   8  -1   45.22    4.14 
  -4  -8   1   36.66    5.37 
   3   8  -1    5.90    2.28 
   3   8  -1    7.19    1.32 
  -3  -8   1    5.56    3.35 
   2   8  -1    1.26    1.52 
   2   8  -1    1.01    1.03 
  -2  -8   1    0.56    2.93 
   1   8  -1    3.09    1.81 
   1   8  -1    0.80    1.18 
  -1  -8   1    1.30    3.25 
  -1  -8   1    0.50    2.38 
   0   8  -1   14.90    2.13 
   0   8  -1   18.87    2.78 
   0  -8   1   22.08    3.36 
   0  -8   1   20.61    4.30 
  -1   8  -1   82.11    4.62 
  -1   8  -1   78.58    4.27 
   1  -8   1   78.08    5.03 
   1  -8   1   65.37    5.41 
  -2   8  -1   17.22    2.65 
  -2   8  -1   11.92    2.62 
   2  -8   1   10.52    2.95 
   2  -8   1    7.77    3.18 
  -3   8  -1   13.19    2.38 
  -3   8  -1   13.18    3.04 
   3  -8   1   13.91    3.81 
   3  -8   1   14.08    3.12 
  -4   8  -1   60.06    5.02 
  -4   8  -1   53.75    3.63 
   4  -8   1   52.90    5.11 
   4  -8   1   58.37    4.48 
  -5   8  -1   22.10    4.17 
  -5   8  -1   18.19    2.63 
   5  -8   1   14.28    3.84 
   5  -8   1   11.88    3.02 
  -6   8  -1  141.13    7.99 
  -6   8  -1  143.09    5.58 
   6  -8   1  142.75    8.45 
   6  -8   1  149.78    7.67 
  -7   8  -1   -0.70    1.21 
  -7   8  -1   -2.16    2.46 
   7  -8   1    4.24    3.32 
   7  -8   1    1.96    2.56 
  -8   8  -1    3.36    2.61 
   8  -8   1   -1.46    2.06 
   8  -8   1    2.42    2.36 
  -9   8  -1   17.28    4.60 
   9  -8   1   12.60    3.82 
   9  -8   1   15.86    4.33 
 -10   8  -1    2.54    3.18 
  10  -8   1    2.80    3.48 
  10  -8   1    1.93    2.90 
 -11   8  -1   68.55    7.47 
  11  -8   1   75.42    7.61 
  11  -8   1   73.11    7.14 
 -12   8  -1   -0.78    3.58 
  12  -8   1    4.37    3.44 
  12  -8   1    5.08    3.31 
  11   7  -1    1.94    1.96 
  11   7  -1   -2.36    2.91 
 -11  -7   1    4.92    5.51 
  10   7  -1   -1.37    1.69 
  10   7  -1    0.35    2.89 
 -10  -7   1   -0.24    4.28 
   9   7  -1   17.17    4.75 
   9   7  -1    9.86    2.78 
  -9  -7   1   19.50    5.58 
   8   7  -1   -1.10    1.82 
   8   7  -1    0.07    1.81 
  -8  -7   1    1.72    4.19 
   7   7  -1   -1.90    1.89 
   7   7  -1   -0.85    1.64 
  -7  -7   1    0.31    3.51 
   6   7  -1   -0.92    2.25 
   6   7  -1   -0.85    1.66 
  -6  -7   1    6.19    4.11 
   5   7  -1   58.50    4.58 
   5   7  -1   62.14    5.78 
  -5  -7   1   61.18    6.07 
   4   7  -1   28.92    4.31 
   4   7  -1   21.50    1.47 
   4   7  -1   23.69    3.02 
  -4  -7   1   21.15    4.50 
   3   7  -1    4.09    0.96 
   3   7  -1    5.94    2.03 
  -3  -7   1    1.75    2.79 
   2   7  -1   94.05    3.39 
   2   7  -1   92.26    5.04 
  -2  -7   1  106.01    6.33 
   1   7  -1  233.25    8.43 
  -1  -7   1  247.43    9.03 
   0   7  -1  163.01    5.58 
   0   7  -1  179.43    6.79 
   0  -7   1  164.08    6.98 
   0  -7   1  149.90    7.80 
  -1   7  -1    3.19    1.53 
  -1   7  -1    4.34    1.71 
   1  -7   1    4.73    2.80 
   1  -7   1    3.52    2.15 
  -2   7  -1    4.59    1.93 
  -2   7  -1    3.99    1.53 
   2  -7   1    3.41    1.89 
   2  -7   1    4.08    2.34 
  -3   7  -1   96.15    5.22 
  -3   7  -1   87.89    4.34 
   3  -7   1   89.12    5.06 
   3  -7   1   89.81    5.61 
  -4   7  -1  100.79    5.90 
  -4   7  -1  112.25    4.79 
   4  -7   1  104.39    6.30 
   4  -7   1  117.41    5.80 
  -5   7  -1   20.81    3.90 
  -5   7  -1   18.61    2.19 
   5  -7   1   17.03    3.19 
   5  -7   1   16.02    3.66 
  -6   7  -1   30.03    4.44 
  -6   7  -1   30.27    2.48 
   6  -7   1   30.11    4.00 
   6  -7   1   29.14    4.52 
  -7   7  -1    0.07    2.94 
  -7   7  -1    0.93    1.19 
   7  -7   1    2.29    2.68 
   7  -7   1    3.07    3.29 
  -8   7  -1    2.50    2.84 
   8  -7   1    3.66    3.12 
   8  -7   1    3.63    2.82 
  -9   7  -1    8.15    3.64 
   9  -7   1    2.92    2.84 
   9  -7   1   10.09    3.72 
 -10   7  -1    4.67    3.40 
  10  -7   1    0.75    2.83 
  10  -7   1    1.57    2.99 
 -11   7  -1    6.24    4.01 
  11  -7   1    0.11    2.69 
  11  -7   1    1.13    3.21 
 -12   7  -1    4.41    3.75 
  12  -7   1    1.31    3.15 
  12  -7   1    7.56    3.80 
  12   6  -1    1.54    3.24 
 -12  -6   1   14.14    6.66 
  11   6  -1    0.69    3.03 
  11   6  -1    0.06    1.69 
 -11  -6   1    0.09    4.37 
  10   6  -1    2.32    1.81 
  10   6  -1    2.05    2.92 
 -10  -6   1    0.12    4.66 
   9   6  -1   15.43    3.10 
   9   6  -1   22.95    5.05 
  -9  -6   1   25.92    6.46 
   8   6  -1   42.03    5.27 
   8   6  -1   47.87    4.18 
  -8  -6   1   34.02    6.50 
   7   6  -1   22.09    3.21 
   7   6  -1   22.57    4.63 
  -7  -6   1   18.76    5.13 
  -7  -6   1   25.13    2.65 
   6   6  -1    1.30    1.67 
   6   6  -1    3.99    2.74 
  -6  -6   1   -0.22    1.28 
  -6  -6   1    1.85    3.74 
   5   6  -1    0.31    2.08 
   5   6  -1   -0.01    1.41 
  -5  -6   1    1.61    1.04 
  -5  -6   1    2.05    3.15 
   4   6  -1   18.84    3.58 
   4   6  -1   16.43    2.64 
  -4  -6   1   19.36    3.91 
   3   6  -1   94.71    5.98 
   3   6  -1   90.59    4.88 
   3   6  -1   95.48    2.91 
  -3  -6   1   90.04    5.75 
   2   6  -1    3.52    0.89 
   2   6  -1    0.75    1.32 
  -2  -6   1    5.79    2.50 
   1   6  -1    2.62    1.01 
   1   6  -1    3.01    1.52 
  -1  -6   1    2.33    1.94 
   0   6  -1   -2.08    0.77 
   0   6  -1   -1.59    1.19 
   0  -6   1    1.67    2.05 
   0  -6   1   -0.28    1.78 
  -1   6  -1   24.58    2.52 
  -1   6  -1   26.59    2.65 
   1  -6   1   27.75    3.55 
   1  -6   1   27.60    3.07 
  -2   6  -1    3.44    1.48 
  -2   6  -1    2.64    1.69 
   2  -6   1    1.86    2.11 
   2  -6   1    2.83    1.80 
  -3   6  -1   11.79    2.01 
  -3   6  -1    9.85    2.53 
   3  -6   1    9.72    2.29 
   3  -6   1    9.95    2.71 
  -4   6  -1   46.41    2.85 
  -4   6  -1   49.99    4.05 
   4  -6   1   48.24    4.33 
   4  -6   1   48.38    3.84 
  -5   6  -1    4.80    1.43 
  -5   6  -1    7.64    2.60 
   5  -6   1    9.59    2.69 
   5  -6   1   11.56    3.07 
  -6   6  -1   14.72    3.38 
  -6   6  -1   14.70    1.70 
   6  -6   1   13.17    3.63 
   6  -6   1    9.74    2.72 
  -7   6  -1   15.25    3.76 
  -7   6  -1   10.27    1.45 
   7  -6   1    9.55    3.43 
   7  -6   1    5.35    2.70 
  -8   6  -1   -1.89    2.88 
   8  -6   1    0.27    2.25 
   8  -6   1   -1.52    2.52 
  -9   6  -1    1.97    2.90 
   9  -6   1    2.71    2.97 
   9  -6   1    1.21    2.84 
 -10   6  -1    4.34    3.34 
  10  -6   1   -1.21    2.42 
  10  -6   1    3.98    3.01 
 -11   6  -1    6.28    3.82 
  11  -6   1   11.33    3.92 
  11  -6   1   13.43    4.33 
 -12   6  -1    0.84    3.12 
  12  -6   1   -1.01    2.82 
  12  -6   1    0.97    3.14 
 -13   6  -1   -1.25    3.03 
  13  -6   1   -4.12    2.47 
  13  -6   1   -0.87    3.07 
  12   5  -1   11.15    4.85 
 -12  -5   1   -0.85    4.75 
  11   5  -1    9.07    2.43 
  11   5  -1    9.33    4.29 
 -11  -5   1    3.90    5.01 
  10   5  -1    8.56    3.94 
  10   5  -1    9.89    2.50 
 -10  -5   1    4.88    4.56 
   9   5  -1    4.12    2.11 
   9   5  -1    5.91    3.08 
  -9  -5   1    7.85    4.42 
   8   5  -1   31.22    3.32 
   8   5  -1   30.04    4.70 
  -8  -5   1   27.79    3.17 
  -8  -5   1   27.30    5.88 
   7   5  -1   31.63    4.40 
   7   5  -1   31.02    3.39 
  -7  -5   1   26.99    5.71 
  -7  -5   1   32.53    2.86 
   6   5  -1    3.71    1.83 
   6   5  -1    5.30    2.66 
  -6  -5   1    4.49    1.60 
  -6  -5   1   10.85    4.15 
   5   5  -1    3.08    2.13 
   5   5  -1   -0.70    1.15 
  -5  -5   1    2.08    1.19 
  -5  -5   1   -1.79    2.41 
   4   5  -1    8.39    1.99 
   4   5  -1    9.90    2.70 
  -4  -5   1   10.61    3.26 
   3   5  -1   15.29    2.49 
   3   5  -1   12.01    1.02 
   3   5  -1   19.34    3.34 
  -3  -5   1   16.48    3.30 
   2   5  -1    8.60    0.95 
   2   5  -1    8.38    2.35 
   2   5  -1    9.76    2.06 
  -2  -5   1   10.69    2.69 
   1   5  -1   73.30    3.81 
   1   5  -1   68.84    2.58 
  -1  -5   1   64.89    4.43 
   0   5  -1   26.00    1.99 
   0   5  -1   27.86    2.51 
   0  -5   1   27.67    2.84 
   0  -5   1   27.92    3.48 
  -1   5  -1   70.24    3.63 
  -1   5  -1   73.04    3.53 
   1  -5   1   76.32    4.17 
   1  -5   1   72.04    4.46 
  -2   5  -1   91.27    3.95 
  -2   5  -1   83.74    4.15 
   2  -5   1   93.51    4.90 
   2  -5   1   93.04    4.49 
  -3   5  -1   85.99    4.54 
  -3   5  -1   83.39    3.66 
   3  -5   1   85.65    4.78 
   3  -5   1   87.08    4.50 
  -4   5  -1    7.99    1.49 
  -4   5  -1    4.99    2.16 
   4  -5   1    4.96    2.29 
   4  -5   1    9.22    2.32 
  -5   5  -1  179.37    5.25 
  -5   5  -1  163.32    7.41 
   5  -5   1  185.36    7.72 
   5  -5   1  176.53    7.32 
  -6   5  -1    0.21    2.35 
  -6   5  -1    5.95    1.13 
   6  -5   1    4.62    2.82 
   6  -5   1   12.54    2.96 
  -7   5  -1   27.33    4.46 
  -7   5  -1   22.54    1.34 
   7  -5   1   24.70    4.29 
   7  -5   1   19.54    3.70 
  -8   5  -1    3.16    3.38 
   8  -5   1   19.00    4.13 
   8  -5   1    9.33    3.61 
  -9   5  -1    7.53    3.68 
   9  -5   1    2.81    3.28 
   9  -5   1    9.48    3.38 
 -10   5  -1   10.91    3.93 
  10  -5   1    4.42    3.32 
  10  -5   1    7.90    3.41 
 -11   5  -1   21.75    4.81 
  11  -5   1   27.49    5.38 
  11  -5   1   18.40    4.68 
 -12   5  -1    2.83    3.45 
  12  -5   1    1.59    3.38 
  12  -5   1   -0.61    2.54 
 -13   5  -1    0.52    3.31 
  13  -5   1    6.45    3.63 
  13  -5   1   -0.27    2.99 
  12   4  -1    3.58    3.71 
 -12  -4   1    1.46    4.26 
  11   4  -1   15.90    4.90 
 -11  -4   1   12.60    5.81 
  10   4  -1    1.06    3.07 
  10   4  -1    0.59    1.46 
 -10  -4   1    4.02    4.48 
 -10  -4   1   -1.68    2.18 
   9   4  -1    2.80    1.80 
   9   4  -1    4.18    2.94 
  -9  -4   1    6.39    2.56 
   8   4  -1   50.64    5.76 
   8   4  -1   56.57    3.90 
  -8  -4   1   48.97    7.03 
  -8  -4   1   51.49    4.04 
   7   4  -1  103.39    7.13 
   7   4  -1  114.33    5.21 
  -7  -4   1  115.95    4.96 
  -7  -4   1  106.43    8.00 
   6   4  -1   53.68    3.51 
   6   4  -1   48.39    4.83 
  -6  -4   1   50.15    5.61 
  -6  -4   1   48.07    3.03 
   5   4  -1    0.79    1.29 
   5   4  -1    0.10    1.85 
  -5  -4   1    0.49    2.76 
  -5  -4   1    1.78    1.22 
   4   4  -1   24.85    2.47 
   4   4  -1   22.48    3.14 
  -4  -4   1   25.99    1.71 
  -4  -4   1   30.19    4.11 
   3   4  -1   16.72    2.97 
   3   4  -1   16.94    2.14 
  -3  -4   1   18.24    3.16 
   2   4  -1  110.54    5.46 
   2   4  -1  117.44    4.73 
   2   4  -1  116.55    2.97 
  -2  -4   1  121.76    5.54 
   1   4  -1   11.51    1.15 
   1   4  -1   16.89    2.07 
  -1  -4   1   18.41    2.75 
   0   4  -1   43.07    2.24 
   0   4  -1   42.72    2.71 
   0  -4   1   41.27    3.17 
  -1   4  -1   28.79    2.31 
  -1   4  -1   34.02    2.33 
   1  -4   1   33.17    3.11 
   1  -4   1   28.91    2.75 
  -2   4  -1   33.99    2.24 
  -2   4  -1   38.12    2.85 
   2  -4   1   36.75    3.11 
   2  -4   1   36.47    2.87 
  -3   4  -1   52.57    2.64 
  -3   4  -1   55.81    3.79 
   3  -4   1   57.87    3.72 
   3  -4   1   54.43    3.46 
  -4   4  -1   13.37    2.71 
  -4   4  -1   12.11    1.38 
   4  -4   1    7.74    2.08 
   4  -4   1    9.90    2.36 
  -5   4  -1    8.86    2.43 
  -5   4  -1   10.77    1.11 
   5  -4   1   10.57    2.64 
   5  -4   1    7.28    2.28 
  -6   4  -1   11.58    1.00 
  -6   4  -1   11.83    3.12 
   6  -4   1   11.69    2.75 
   6  -4   1   16.31    3.12 
  -7   4  -1   31.66    4.32 
   7  -4   1   37.47    4.14 
   7  -4   1   21.85    4.00 
  -8   4  -1   19.78    4.31 
   8  -4   1   27.68    4.68 
   8  -4   1   25.76    4.01 
  -9   4  -1   41.51    5.47 
   9  -4   1   48.57    5.17 
   9  -4   1   40.24    5.30 
 -10   4  -1    3.06    3.27 
  10  -4   1    2.04    2.53 
  10  -4   1    6.22    3.18 
 -11   4  -1    2.35    3.33 
  11  -4   1   -1.75    2.40 
  11  -4   1    6.00    3.53 
 -12   4  -1    1.67    3.09 
  12  -4   1    6.25    3.78 
  12  -4   1    6.39    3.63 
 -13   4  -1    2.95    3.62 
  13  -4   1    7.31    4.25 
  13  -4   1    3.19    3.70 
  13   3  -1   -1.98    3.18 
  12   3  -1   -3.89    2.37 
  11   3  -1   14.26    4.85 
 -11  -3   1   10.32    3.03 
  10   3  -1    2.88    2.89 
  10   3  -1    1.90    1.51 
 -10  -3   1   -1.76    2.11 
   9   3  -1    2.90    3.07 
   9   3  -1    5.47    1.81 
  -9  -3   1    9.43    2.85 
   8   3  -1   36.98    4.78 
   8   3  -1   30.96    2.89 
  -8  -3   1   27.16    3.70 
   7   3  -1    2.17    2.46 
   7   3  -1    1.46    1.33 
  -7  -3   1    4.31    2.07 
   6   3  -1   53.46    4.78 
   6   3  -1   62.90    3.43 
  -6  -3   1   57.90    3.36 
   5   3  -1    2.39    2.17 
   5   3  -1   -0.29    1.06 
  -5  -3   1    1.93    1.32 
   4   3  -1   54.21    4.19 
   4   3  -1   51.89    3.11 
  -4  -3   1   56.02    4.50 
  -4  -3   1   56.73    2.51 
   3   3  -1  291.66    9.67 
   3   3  -1  299.03    8.29 
  -3  -3   1  285.82    9.66 
  -3  -3   1  286.51    6.68 
   2   3  -1    0.14    1.44 
   2   3  -1    0.17    1.16 
  -2  -3   1   -0.32    1.82 
   1   3  -1   44.25    1.46 
   1   3  -1   30.94    2.79 
   1   3  -1   30.41    2.31 
  -1  -3   1   35.34    3.17 
   0   3  -1  242.49    6.12 
   0   3  -1  251.83    6.85 
   0  -3   1  247.84    7.32 
  -1   3  -1   23.72    2.30 
  -1   3  -1   21.81    1.93 
   1  -3   1   21.58    2.72 
   1  -3   1   21.84    2.51 
  -2   3  -1   28.98    2.63 
  -2   3  -1   29.92    1.93 
   2  -3   1   29.03    2.67 
   2  -3   1   25.24    2.46 
  -3   3  -1  116.10    3.55 
  -3   3  -1  117.93    4.96 
   3  -3   1  109.05    4.70 
   3  -3   1  117.04    4.80 
  -4   3  -1    2.04    1.71 
  -4   3  -1    2.49    0.79 
   4  -3   1    5.02    1.79 
   4  -3   1    3.52    1.90 
  -5   3  -1   91.68    2.59 
  -5   3  -1   98.19    5.15 
   5  -3   1   89.94    4.98 
   5  -3   1   90.08    5.05 
  -6   3  -1   -0.66    1.88 
   6  -3   1    2.27    1.76 
   6  -3   1    2.78    1.99 
  -7   3  -1   42.48    4.39 
   7  -3   1   36.47    4.27 
   7  -3   1   46.15    4.36 
  -8   3  -1   40.99    5.14 
   8  -3   1   40.49    4.49 
   8  -3   1   49.70    5.06 
  -9   3  -1   42.19    5.28 
   9  -3   1   39.20    4.93 
   9  -3   1   39.97    5.01 
 -10   3  -1   10.87    3.75 
  10  -3   1   16.39    3.94 
  10  -3   1    8.74    3.77 
 -11   3  -1   16.21    4.41 
  11  -3   1    7.99    3.46 
  11  -3   1    7.22    3.72 
 -12   3  -1   12.22    4.30 
  12  -3   1    7.63    3.82 
  12  -3   1    6.08    3.74 
 -13   3  -1   18.24    4.95 
  13  -3   1   11.46    4.46 
  13  -3   1    6.20    3.80 
  14  -3   1    0.88    3.30 
  14  -3   1    3.72    3.86 
  13   2  -1    6.29    4.32 
  12   2  -1    3.23    3.80 
 -12  -2   1   17.12    3.87 
  11   2  -1   26.72    5.76 
 -11  -2   1   28.59    4.36 
  10   2  -1   -0.56    2.84 
 -10  -2   1    3.22    2.50 
   9   2  -1   28.72    2.58 
   9   2  -1   27.47    5.25 
  -9  -2   1   25.97    4.04 
   8   2  -1   12.21    2.01 
   8   2  -1   13.91    4.06 
  -8  -2   1   10.29    2.95 
   7   2  -1   99.45    6.85 
   7   2  -1  101.55    4.26 
  -7  -2   1  103.43    5.20 
   6   2  -1   29.44    3.94 
   6   2  -1   30.61    2.29 
  -6  -2   1   33.83    2.91 
   5   2  -1   39.20    3.86 
   5   2  -1   42.16    2.57 
  -5  -2   1   45.38    2.86 
   4   2  -1   45.31    3.83 
   4   2  -1   49.87    2.73 
  -4  -2   1   53.80    2.66 
   3   2  -1   61.49    3.92 
   3   2  -1   71.72    3.10 
  -3  -2   1   66.64    2.53 
   2   2  -1   67.18    2.97 
   2   2  -1   68.50    3.87 
  -2  -2   1   68.18    1.98 
  -2  -2   1   63.80    4.09 
   1   2  -1   12.77    1.52 
   1   2  -1   11.87    1.84 
  -1  -2   1   13.32    2.32 
   0   2  -1  363.18    8.20 
   0   2  -1  367.99    8.81 
   0  -2   1  378.81    9.29 
  -1   2  -1   48.02    2.39 
  -1   2  -1   49.26    2.11 
   1  -2   1   49.77    2.52 
   1  -2   1   48.64    2.57 
  -2   2  -1  369.74    8.45 
  -2   2  -1  375.99    9.57 
   2  -2   1  353.54    9.18 
   2  -2   1  371.67    9.57 
  -3   2  -1   87.88    4.24 
  -3   2  -1   92.06    2.74 
   3  -2   1   90.95    4.12 
   3  -2   1   98.81    4.21 
  -4   2  -1    1.04    0.55 
  -4   2  -1   -1.99    1.47 
   4  -2   1   -1.09    1.28 
   4  -2   1    0.00    1.39 
  -5   2  -1  259.62    8.84 
   5  -2   1  260.72    8.94 
   5  -2   1  273.24    9.11 
  -6   2  -1   71.52    4.71 
   6  -2   1   74.50    4.84 
   6  -2   1   72.38    4.92 
  -7   2  -1   17.71    3.42 
   7  -2   1   19.68    3.54 
   7  -2   1   12.48    3.10 
  -8   2  -1   30.21    4.32 
   8  -2   1   45.02    4.72 
   8  -2   1   49.23    5.03 
  -9   2  -1   14.27    4.11 
   9  -2   1   15.27    3.71 
   9  -2   1   16.19    4.22 
 -10   2  -1   12.28    4.09 
  10  -2   1   22.81    4.71 
  10  -2   1   17.63    4.12 
 -11   2  -1   23.07    4.73 
  11  -2   1   35.73    5.29 
  11  -2   1   25.95    5.17 
 -12   2  -1    4.46    3.59 
  12  -2   1   -0.80    2.72 
  12  -2   1   -3.08    2.52 
 -13   2  -1   17.24    4.95 
  13  -2   1   17.28    5.09 
  13  -2   1   23.81    5.66 
 -14   2  -1    1.47    3.41 
  14  -2   1    4.07    3.90 
  13   1  -1   -3.35    2.86 
 -13  -1   1   -1.95    2.57 
  12   1  -1   -2.22    2.74 
 -12  -1   1    2.35    3.01 
  11   1  -1   -1.58    2.47 
 -11  -1   1   -7.23    1.99 
  10   1  -1    2.75    3.17 
 -10  -1   1    0.95    2.24 
   9   1  -1    5.61    1.42 
   9   1  -1    5.34    3.26 
  -9  -1   1    5.85    3.17 
   8   1  -1   45.43    5.16 
  -8  -1   1   49.79    4.48 
   7   1  -1    7.79    2.87 
   7   1  -1   14.10    1.67 
  -7  -1   1   16.19    3.06 
   6   1  -1   17.37    1.68 
   6   1  -1   21.59    3.29 
  -6  -1   1   17.61    2.55 
   5   1  -1   -0.03    0.79 
   5   1  -1    3.11    1.95 
  -5  -1   1    0.84    1.47 
   4   1  -1    1.41    0.93 
   4   1  -1   -1.75    1.45 
  -4  -1   1    0.25    1.22 
   3   1  -1    1.35    1.54 
   3   1  -1    1.85    0.99 
  -3  -1   1    3.24    1.27 
   2   1  -1   55.96    3.28 
   2   1  -1   58.53    2.40 
  -2  -1   1   56.96    2.17 
   1   1  -1  134.69    4.33 
   1   1  -1  141.19    3.87 
  -1  -1   1  135.48    4.49 
   0   1  -1  237.84    5.72 
   0   1  -1  235.65    5.68 
   0  -1   1  239.09    6.05 
  -1   1  -1    3.88    0.66 
   1  -1   1    4.67    0.97 
   1  -1   1    4.42    0.76 
  -2   1  -1  333.14    8.45 
  -2   1  -1  342.16    7.41 
   2  -1   1  335.41    8.57 
   2  -1   1  338.85    8.26 
  -3   1  -1   18.93    2.49 
  -3   1  -1   18.09    1.19 
   3  -1   1   18.66    2.26 
   3  -1   1   15.50    2.26 
  -4   1  -1   72.71    2.05 
  -4   1  -1   71.62    3.92 
   4  -1   1   75.19    4.03 
   4  -1   1   67.42    3.90 
  -5   1  -1    1.99    0.60 
  -5   1  -1    3.30    1.76 
   5  -1   1    1.75    1.62 
   5  -1   1    1.59    1.65 
  -6   1  -1   14.48    2.85 
   6  -1   1   13.71    3.03 
   6  -1   1   16.26    3.08 
  -7   1  -1    5.72    2.47 
   7  -1   1    9.30    2.88 
   7  -1   1    6.25    2.46 
  -8   1  -1   -2.05    2.18 
   8  -1   1    4.91    2.39 
   8  -1   1   -1.25    2.07 
  -9   1  -1   -0.26    2.92 
   9  -1   1   -1.05    2.41 
   9  -1   1   -1.21    2.02 
 -10   1  -1   28.67    5.05 
  10  -1   1   31.42    5.05 
  10  -1   1   29.80    4.70 
 -11   1  -1   -1.00    2.86 
  11  -1   1   -3.79    1.86 
  11  -1   1   -2.49    2.07 
 -12   1  -1    8.77    3.66 
  12  -1   1    2.91    3.31 
  12  -1   1    2.92    2.89 
 -13   1  -1    0.69    3.32 
  13  -1   1   -2.64    2.81 
  13  -1   1   -2.49    3.03 
 -14   1  -1   -0.34    2.93 
  14  -1   1    0.54    3.35 
  13   0  -1   15.88    5.12 
 -13   0   1    4.47    3.53 
  12   0  -1    2.42    3.52 
 -12   0   1   -0.09    2.94 
  11   0  -1    7.36    3.58 
 -11   0   1    9.93    3.28 
  10   0  -1   47.72    6.02 
 -10   0   1   42.04    4.93 
   9   0  -1   22.06    4.86 
  -9   0   1   17.90    3.77 
   8   0  -1    1.32    0.81 
   8   0  -1   -3.03    2.22 
  -8   0   1   -1.14    2.16 
   7   0  -1    3.34    2.37 
   7   0  -1    0.69    0.83 
  -7   0   1   -0.95    1.90 
   6   0  -1   -1.30    1.44 
   6   0  -1    0.89    0.75 
  -6   0   1    0.35    1.80 
   5   0  -1  115.10    3.45 
   5   0  -1  108.99    5.65 
   5   0  -1  111.08    5.98 
  -5   0   1  112.65    4.88 
   4   0  -1   46.16    1.97 
   4   0  -1   44.84    3.45 
   4   0  -1   44.09    3.68 
  -4   0   1   45.65    2.97 
   3   0  -1   61.91    3.81 
   3   0  -1   62.66    2.27 
  -3   0   1   64.50    3.05 
   2   0  -1  323.19    7.34 
   2   0  -1  329.56    8.90 
  -2   0   1  318.04    7.69 
   1   0  -1  200.80    5.44 
   1   0  -1  200.88    4.74 
  -1   0   1  206.49    4.74 
   0   0   1    1.80    0.31 
   0   0   1    1.26    0.42 
  -1   0  -1  153.92    3.38 
   1   0   1  144.10    3.76 
   1   0   1  120.55    3.54 
   2   0   1    8.66    1.25 
   2   0   1    7.99    1.28 
   3   0   1  203.86    6.48 
   3   0   1  203.15    4.86 
   3   0   1  205.13    6.36 
  -4   0  -1  143.86    5.27 
   4   0   1  142.02    3.76 
   4   0   1  141.62    5.66 
   4   0   1  139.10    5.55 
  -5   0  -1    5.46    1.91 
   5   0   1    3.61    1.92 
   5   0   1    1.86    1.63 
   5   0   1    7.15    1.04 
  -6   0  -1    4.09    1.99 
   6   0   1    3.69    1.98 
   6   0   1    1.20    0.72 
   6   0   1    4.76    2.14 
  -7   0  -1    1.68    2.16 
   7   0   1    0.42    1.92 
   7   0   1   -0.17    1.79 
  -8   0  -1    4.51    2.83 
   8   0   1    1.20    2.28 
   8   0   1    1.21    2.07 
  -9   0  -1   15.67    3.84 
   9   0   1   15.49    3.82 
   9   0   1    8.01    3.26 
 -10   0  -1   -4.55    2.67 
  10   0   1    1.93    2.57 
  10   0   1   -1.31    2.32 
 -11   0  -1   22.98    4.58 
  11   0   1    6.97    3.57 
  11   0   1   17.92    4.62 
 -12   0  -1   44.62    5.67 
  12   0   1   50.12    6.39 
  12   0   1   46.58    6.42 
 -13   0  -1   11.59    4.12 
  13   0   1   15.18    5.06 
 -14   0  -1   17.34    5.03 
  14   0   1   23.36    6.03 
  13  -1  -1    7.86    4.39 
 -13   1   1   11.30    4.03 
  12  -1  -1   12.85    4.67 
 -12   1   1   20.90    4.55 
  11  -1  -1    2.07    3.15 
 -11   1   1   -4.29    2.41 
  10  -1  -1   38.02    5.47 
 -10   1   1   40.18    4.86 
   9  -1  -1   -1.60    2.48 
  -9   1   1    0.43    2.70 
   8  -1  -1   20.59    4.15 
   8  -1  -1   25.32    4.52 
  -8   1   1   19.03    3.61 
   7  -1  -1   15.01    3.75 
   7  -1  -1   22.08    3.93 
  -7   1   1   18.30    3.28 
   6  -1  -1    9.02    0.86 
   6  -1  -1    6.80    2.26 
   6  -1  -1    7.44    2.64 
  -6   1   1    8.43    2.43 
   5  -1  -1   22.98    3.16 
   5  -1  -1   27.46    1.18 
   5  -1  -1   21.80    2.97 
  -5   1   1   26.75    2.78 
   4  -1  -1  115.68    2.98 
   4  -1  -1  119.34    5.32 
   4  -1  -1  114.09    5.49 
  -4   1   1  119.54    4.87 
   3  -1  -1   28.30    2.92 
   3  -1  -1   25.90    1.25 
   3  -1  -1   26.78    2.52 
  -3   1   1   26.35    2.51 
   2  -1  -1  119.39    4.17 
   2  -1  -1  125.48    4.68 
   2  -1  -1  114.87    2.99 
  -2   1   1  119.78    4.01 
   1  -1  -1   28.17    1.45 
   1  -1  -1   29.13    1.76 
  -1   1   1   26.79    1.45 
   0  -1  -1  228.79    5.42 
   0   1   1  221.72    5.24 
   0   1   1  229.99    5.30 
   1   1   1   45.55    1.66 
   1   1   1   45.25    1.64 
   1   1   1   41.95    1.73 
   1   1   1   46.48    1.66 
   2   1   1  180.37    4.63 
   2   1   1  174.59    5.25 
   2   1   1  181.73    5.21 
   2   1   1  181.34    4.86 
   3   1   1   35.39    2.69 
   3   1   1   33.61    1.84 
   3   1   1   32.92    2.69 
   4   1   1   42.64    3.23 
   4   1   1   47.87    3.30 
   4   1   1   46.38    2.16 
   5   1   1  169.13    4.81 
   5   1   1  158.03    6.56 
   5   1   1  161.14    6.76 
  -6  -1  -1    2.47    1.89 
   6   1   1    1.62    1.74 
   6   1   1    0.06    0.85 
   6   1   1    1.65    1.70 
  -7  -1  -1  207.71    8.06 
   7   1   1  237.49    9.51 
   7   1   1  195.11    8.79 
   7   1   1  214.04    6.05 
  -8  -1  -1   10.01    3.04 
   8   1   1   12.51    3.49 
   8   1   1   12.22    1.63 
   8   1   1   10.60    3.29 
  -9  -1  -1   18.59    3.97 
   9   1   1   14.90    1.84 
   9   1   1   13.44    3.52 
   9   1   1    7.53    3.39 
 -10  -1  -1   22.60    4.33 
  10   1   1   11.73    3.63 
  10   1   1   27.45    5.50 
 -11  -1  -1    2.31    2.79 
  11   1   1    3.56    3.17 
  11   1   1   -2.83    2.08 
 -12  -1  -1   49.43    5.63 
  12   1   1   44.39    6.36 
 -13  -1  -1    4.63    3.54 
  13   1   1    4.59    3.74 
 -14  -1  -1    2.41    3.53 
  14   1   1   -6.41    2.55 
  13  -2  -1    4.86    3.77 
 -13   2   1    8.73    4.07 
  12  -2  -1   -0.03    3.29 
 -12   2   1   -1.55    2.65 
  11  -2  -1    0.28    2.84 
 -11   2   1   -0.71    2.95 
  10  -2  -1   -1.51    2.66 
  10  -2  -1    3.98    2.95 
 -10   2   1   -1.51    2.67 
   9  -2  -1   45.24    5.37 
   9  -2  -1   42.98    5.59 
  -9   2   1   51.11    5.23 
   8  -2  -1   11.73    3.33 
   8  -2  -1   10.27    3.70 
  -8   2   1   13.45    3.43 
   7  -2  -1    9.97    3.18 
   7  -2  -1    7.76    2.79 
  -7   2   1   10.55    2.74 
   6  -2  -1   27.22    3.29 
   6  -2  -1   22.90    3.39 
  -6   2   1   22.78    3.07 
   5  -2  -1  183.62    7.18 
   5  -2  -1  184.30    7.73 
  -5   2   1  183.61    6.90 
   4  -2  -1  210.85    7.95 
   4  -2  -1  216.84    7.40 
  -4   2   1  232.07    7.36 
   3  -2  -1  105.45    2.74 
   3  -2  -1  110.58    4.45 
   3  -2  -1   99.28    4.80 
  -3   2   1  107.02    4.44 
   2  -2  -1    4.47    1.85 
   2  -2  -1    3.11    1.25 
  -2   2   1    4.33    0.87 
  -2   2   1    4.83    1.61 
   1  -2  -1  221.14    6.42 
   1  -2  -1  231.37    5.62 
  -1   2   1  236.65    5.58 
  -1   2   1  232.34    6.11 
   0  -2  -1    7.17    1.35 
   0   2   1    6.56    0.98 
   0   2   1    6.28    0.98 
   1   2   1   41.12    1.73 
   1   2   1   39.51    1.90 
   2   2   1  562.41   12.87 
   2   2   1  563.79   12.40 
   2   2   1  543.16   12.58 
   2   2   1  544.89   13.42 
   3   2   1   74.43    3.09 
   3   2   1   71.59    2.99 
   3   2   1   75.13    3.88 
   3   2   1   73.74    3.58 
   4   2   1   -1.34    1.37 
   4   2   1   -0.08    0.91 
   4   2   1   -0.71    1.25 
   5   2   1   72.82    4.56 
   5   2   1   71.89    4.41 
   5   2   1   67.77    3.11 
   6   2   1   20.19    3.04 
   6   2   1   22.36    3.21 
   6   2   1   24.48    2.01 
  -7  -2  -1    4.96    2.18 
   7   2   1    4.02    2.27 
   7   2   1    1.28    1.08 
   7   2   1   -0.14    2.07 
  -8  -2  -1    1.06    2.38 
   8   2   1    2.47    2.58 
   8   2   1   -0.32    0.99 
   8   2   1    1.73    2.39 
  -9  -2  -1   -1.10    2.60 
   9   2   1   11.00    3.69 
   9   2   1    8.18    1.73 
   9   2   1    1.59    2.89 
 -10  -2  -1   30.06    4.46 
  10   2   1   22.40    2.32 
  10   2   1   22.37    4.96 
 -11  -2  -1    9.31    3.46 
  11   2   1   13.53    4.30 
 -12  -2  -1   -2.16    2.77 
  12   2   1    0.44    2.90 
 -13  -2  -1   11.62    3.87 
  13   2   1   12.20    4.65 
  13  -3  -1    5.21    4.00 
 -13   3   1    1.03    3.13 
  12  -3  -1    5.39    3.70 
 -12   3   1    1.69    3.08 
  11  -3  -1    3.11    3.22 
  11  -3  -1    5.24    3.41 
 -11   3   1    1.59    2.97 
  10  -3  -1    7.06    3.57 
  10  -3  -1    4.13    3.00 
 -10   3   1   -0.05    2.69 
   9  -3  -1   -0.76    2.63 
   9  -3  -1    5.77    3.62 
  -9   3   1    3.32    2.78 
   8  -3  -1   28.09    4.83 
   8  -3  -1   24.96    4.08 
  -8   3   1   24.92    4.23 
   7  -3  -1    3.97    2.42 
   7  -3  -1    7.52    3.12 
  -7   3   1    3.59    2.53 
   6  -3  -1    5.07    2.17 
   6  -3  -1    0.86    2.05 
  -6   3   1    4.04    2.19 
   5  -3  -1    4.09    2.02 
   5  -3  -1    6.59    2.12 
  -5   3   1    2.53    1.87 
   4  -3  -1    5.39    1.78 
   4  -3  -1    5.26    1.95 
  -4   3   1    6.23    1.90 
   3  -3  -1  205.10    7.27 
   3  -3  -1  193.93    6.41 
  -3   3   1  211.33    6.86 
  -3   3   1  200.91    5.05 
   2  -3  -1    1.54    1.64 
   2  -3  -1    5.44    1.39 
  -2   3   1    4.51    1.01 
  -2   3   1    5.02    1.61 
   1  -3  -1   37.51    1.89 
   1  -3  -1   43.62    3.26 
  -1   3   1   34.28    1.99 
  -1   3   1   35.37    2.40 
   0  -3  -1  124.05    4.82 
   0  -3  -1  119.11    3.26 
   0   3   1  119.22    3.91 
   0   3   1  117.99    3.91 
  -1  -3  -1   55.24    2.66 
   1   3   1   55.05    2.72 
   1   3   1   54.41    2.37 
   2   3   1    3.05    1.53 
   2   3   1    0.73    1.14 
   2   3   1    0.38    0.94 
   3   3   1  115.17    4.27 
   3   3   1  111.57    5.10 
   3   3   1  112.51    3.81 
   4   3   1   10.76    2.48 
   4   3   1   12.45    1.88 
   4   3   1   13.77    1.72 
   5   3   1   26.70    2.19 
   5   3   1   19.44    3.02 
   6   3   1   28.59    3.53 
   6   3   1   33.01    2.50 
   7   3   1  125.81    7.15 
   7   3   1  126.56    5.01 
  -8  -3  -1   17.71    3.36 
   8   3   1   14.78    2.23 
   8   3   1   14.42    3.71 
  -9  -3  -1    3.02    2.89 
   9   3   1    4.87    3.24 
   9   3   1    8.07    1.96 
 -10  -3  -1   -0.65    2.56 
  10   3   1   11.52    4.00 
  10   3   1    3.69    1.63 
 -11  -3  -1    7.05    2.92 
  11   3   1   15.52    4.40 
 -12  -3  -1    1.88    3.03 
  12   3   1    1.84    3.17 
 -13  -3  -1    4.52    3.44 
  13   3   1    4.92    3.99 
  13  -4  -1    3.75    3.61 
 -13   4   1    3.89    3.47 
  12  -4  -1   52.18    6.81 
 -12   4   1   52.50    6.43 
  11  -4  -1   12.45    4.32 
  11  -4  -1    4.17    3.37 
 -11   4   1    6.32    3.60 
  10  -4  -1   15.69    4.50 
  10  -4  -1   21.18    4.91 
 -10   4   1    8.55    3.35 
   9  -4  -1   23.19    4.88 
   9  -4  -1   27.92    4.46 
  -9   4   1   20.99    4.30 
   8  -4  -1    2.67    2.57 
   8  -4  -1   -1.65    2.52 
  -8   4   1    0.85    2.82 
   7  -4  -1   70.98    5.30 
   7  -4  -1   86.75    6.24 
  -7   4   1   82.71    5.83 
   6  -4  -1   -0.72    2.04 
   6  -4  -1    2.10    1.92 
  -6   4   1    1.06    2.10 
   5  -4  -1   75.57    5.14 
   5  -4  -1   76.95    4.57 
  -5   4   1   74.01    4.76 
   4  -4  -1  112.68    5.83 
   4  -4  -1  114.13    5.11 
  -4   4   1  110.07    5.34 
  -4   4   1  110.87    3.41 
   3  -4  -1  110.55    5.45 
   3  -4  -1  122.57    4.79 
  -3   4   1  122.68    3.83 
  -3   4   1  122.27    5.23 
   2  -4  -1   54.08    2.77 
   2  -4  -1   48.83    3.59 
  -2   4   1   51.70    2.49 
  -2   4   1   56.52    3.25 
   1  -4  -1   61.54    2.53 
   1  -4  -1   71.08    4.06 
  -1   4   1   62.25    3.21 
  -1   4   1   65.83    2.94 
   0  -4  -1    3.91    2.07 
   0  -4  -1    2.19    1.06 
   0   4   1    2.85    1.22 
   0   4   1    0.91    1.16 
  -1  -4  -1  277.63    7.19 
   1   4   1  265.23    7.62 
   1   4   1  275.55    7.10 
  -2  -4  -1   20.41    2.51 
   2   4   1   20.72    1.63 
   2   4   1   20.45    2.07 
   3   4   1    3.60    1.14 
   3   4   1    7.15    2.09 
   3   4   1    4.45    1.45 
   4   4   1   60.90    3.40 
   4   4   1   57.92    4.21 
   4   4   1   68.79    3.03 
   5   4   1    2.88    1.87 
   5   4   1    4.11    1.41 
   5   4   1   -1.31    0.93 
   6   4   1   23.98    2.53 
   6   4   1   29.12    3.60 
   7   4   1   14.72    2.22 
   7   4   1   11.67    3.20 
  -8  -4  -1   12.16    3.07 
   8   4   1    9.49    3.34 
   8   4   1    7.21    1.92 
  -9  -4  -1    4.04    2.70 
   9   4   1    5.87    3.27 
   9   4   1    1.55    1.59 
 -10  -4  -1   19.80    3.74 
  10   4   1   15.17    4.26 
  10   4   1   13.07    2.39 
 -11  -4  -1    4.80    2.97 
  11   4   1    6.52    3.46 
  11   4   1    6.05    2.02 
 -12  -4  -1   27.02    4.52 
  12   4   1   29.06    6.22 
  13   4   1   29.04    6.41 
  13  -5  -1   34.53    7.24 
 -13   5   1   18.42    5.13 
  12  -5  -1   17.89    5.48 
  12  -5  -1   15.73    5.07 
 -12   5   1    0.93    3.08 
  11  -5  -1   25.32    5.44 
  11  -5  -1   19.04    5.20 
 -11   5   1   34.48    5.89 
  10  -5  -1   11.34    4.07 
  10  -5  -1    6.58    3.23 
 -10   5   1    8.40    3.49 
   9  -5  -1   26.98    4.27 
   9  -5  -1   28.75    5.41 
  -9   5   1   33.45    5.14 
   8  -5  -1    3.24    2.71 
   8  -5  -1    0.26    2.73 
  -8   5   1   -0.42    2.75 
   7  -5  -1   41.03    4.89 
   7  -5  -1   34.90    4.19 
  -7   5   1   35.51    4.59 
   6  -5  -1    5.88    2.94 
   6  -5  -1    8.84    2.58 
  -6   5   1    7.79    2.70 
   5  -5  -1   -0.13    1.60 
   5  -5  -1    2.53    2.31 
  -5   5   1    4.23    1.05 
  -5   5   1    4.69    2.26 
   4  -5  -1   48.77    3.45 
   4  -5  -1   52.26    4.23 
  -4   5   1   47.63    2.36 
  -4   5   1   50.01    3.88 
   3  -5  -1   34.11    2.58 
   3  -5  -1   23.86    3.07 
  -3   5   1   34.65    2.17 
  -3   5   1   34.86    3.18 
   2  -5  -1    6.00    1.43 
   2  -5  -1    6.75    2.29 
  -2   5   1    7.32    1.48 
  -2   5   1    7.36    1.89 
   1  -5  -1    2.23    1.17 
   1  -5  -1    4.91    2.10 
  -1   5   1   -0.42    1.14 
  -1   5   1    0.84    1.12 
   0  -5  -1   14.93    1.83 
   0  -5  -1   20.84    3.15 
   0   5   1   15.31    2.05 
   0   5   1   17.44    1.95 
  -1  -5  -1   34.42    3.73 
  -1  -5  -1   38.89    2.77 
   1   5   1   43.18    2.46 
   1   5   1   41.14    2.81 
  -2  -5  -1  236.38    7.38 
   2   5   1  232.94    7.43 
   2   5   1  238.98    6.46 
  -3  -5  -1    1.06    1.83 
   3   5   1    1.32    1.24 
   3   5   1    3.90    1.13 
   3   5   1    4.87    2.05 
  -4  -5  -1   23.22    3.18 
   4   5   1   25.43    2.55 
   4   5   1   23.29    3.19 
   4   5   1   22.81    1.92 
   5   5   1   12.73    1.78 
   5   5   1    9.59    2.80 
   5   5   1   11.82    2.33 
   6   5   1    1.13    1.43 
   6   5   1    0.30    2.11 
   7   5   1    3.78    1.62 
   7   5   1    4.93    2.81 
   8   5   1   -1.43    2.20 
   8   5   1   -0.05    1.45 
  -9  -5  -1   -4.36    1.87 
   9   5   1   -0.77    2.34 
   9   5   1    0.52    1.50 
 -10  -5  -1   21.88    3.78 
  10   5   1   28.86    3.11 
  10   5   1   15.01    4.27 
 -11  -5  -1    0.33    2.48 
  11   5   1   -1.17    2.80 
  11   5   1   -1.09    1.18 
  12   5   1    3.95    3.71 
  13   5   1    1.19    3.15 
  12  -6  -1   11.47    4.34 
  12  -6  -1    0.28    2.74 
 -12   6   1   16.20    4.78 
  11  -6  -1   -0.18    2.74 
  11  -6  -1   -3.64    2.28 
 -11   6   1    0.24    3.12 
  10  -6  -1   -0.57    2.57 
  10  -6  -1    0.54    3.02 
 -10   6   1    7.34    3.66 
   9  -6  -1    2.38    2.51 
   9  -6  -1    7.02    3.52 
  -9   6   1    6.33    3.26 
   8  -6  -1   -3.01    1.90 
   8  -6  -1    0.38    2.64 
  -8   6   1   -2.31    2.83 
   7  -6  -1    5.25    2.73 
   7  -6  -1   -1.11    2.65 
  -7   6   1   -3.66    2.52 
   6  -6  -1   14.16    3.13 
   6  -6  -1   21.63    4.45 
  -6   6   1   16.71    1.71 
  -6   6   1   18.43    3.74 
   5  -6  -1    9.24    3.13 
   5  -6  -1    7.57    2.44 
  -5   6   1   10.81    1.61 
  -5   6   1   11.63    2.93 
   4  -6  -1   15.39    2.47 
   4  -6  -1   11.97    3.06 
  -4   6   1   16.07    1.78 
  -4   6   1   12.89    2.91 
   3  -6  -1    3.53    1.50 
   3  -6  -1    6.43    2.61 
  -3   6   1    1.40    1.68 
  -3   6   1    3.17    1.18 
   2  -6  -1   14.84    1.91 
   2  -6  -1   17.66    3.27 
  -2   6   1   22.67    2.58 
  -2   6   1   15.76    2.22 
   1  -6  -1    5.99    2.53 
   1  -6  -1    6.86    1.51 
  -1   6   1    4.08    1.52 
  -1   6   1    5.11    1.59 
   0  -6  -1    5.91    2.49 
   0  -6  -1    6.98    1.59 
   0   6   1    2.67    1.40 
   0   6   1    6.53    1.61 
  -1  -6  -1    1.41    1.55 
  -1  -6  -1    7.43    2.54 
   1   6   1    4.57    1.57 
   1   6   1    3.39    1.24 
  -2  -6  -1   -4.39    1.48 
   2   6   1   -1.56    0.73 
   2   6   1   -1.13    1.02 
  -3  -6  -1    8.33    2.41 
   3   6   1    9.86    2.06 
   3   6   1    9.69    1.56 
  -4  -6  -1    2.79    2.34 
   4   6   1    5.17    2.23 
   4   6   1    4.26    1.74 
   4   6   1    7.21    1.48 
  -5  -6  -1    0.59    2.66 
   5   6   1    1.35    2.09 
   5   6   1   -1.15    1.28 
   5   6   1   -0.40    1.11 
  -6  -6  -1    2.16    3.14 
   6   6   1   -0.27    1.30 
   6   6   1    2.61    2.41 
   6   6   1   -1.66    1.39 
  -7  -6  -1   20.65    5.06 
   7   6   1   17.59    4.11 
   7   6   1   22.70    3.08 
   8   6   1    2.45    3.11 
   8   6   1    7.35    2.22 
  -9  -6  -1   -2.00    2.00 
   9   6   1    0.47    2.56 
   9   6   1    1.63    1.58 
  10   6   1    4.61    2.18 
  10   6   1    4.51    3.27 
  11   6   1    8.88    3.88 
  11   6   1    4.32    2.17 
 -12  -6  -1   11.41    5.43 
  12   6   1    1.01    3.25 
  12  -7  -1   -6.23    1.84 
  12  -7  -1    1.09    3.37 
 -12   7   1   -4.30    2.64 
  11  -7  -1   63.33    7.27 
  11  -7  -1   44.41    6.00 
 -11   7   1   53.96    6.77 
  10  -7  -1   -3.77    2.28 
  10  -7  -1   -3.33    2.39 
 -10   7   1    1.26    3.20 
   9  -7  -1   15.21    3.92 
   9  -7  -1    6.72    3.60 
  -9   7   1    4.55    3.21 
   8  -7  -1    0.79    3.02 
   8  -7  -1   -0.73    1.94 
  -8   7   1    0.40    2.75 
   7  -7  -1    0.19    2.84 
   7  -7  -1   -1.01    2.16 
  -7   7   1    0.27    1.01 
  -7   7   1    3.44    3.10 
   6  -7  -1   52.36    4.58 
   6  -7  -1   53.17    5.60 
  -6   7   1   56.63    5.33 
  -6   7   1   51.73    2.87 
   5  -7  -1    2.94    2.77 
   5  -7  -1    4.76    2.15 
  -5   7   1    5.65    1.43 
  -5   7   1   -1.74    2.10 
   4  -7  -1    4.35    1.93 
   4  -7  -1    2.56    2.37 
  -4   7   1    4.12    1.45 
  -4   7   1    1.05    2.08 
   3  -7  -1   -0.53    2.07 
   3  -7  -1    2.90    1.54 
  -3   7   1    1.73    1.25 
  -3   7   1    0.81    1.65 
   2  -7  -1   25.16    2.37 
   2  -7  -1   22.86    3.80 
  -2   7   1   18.57    2.28 
  -2   7   1   22.76    2.76 
   1  -7  -1   14.80    3.30 
   1  -7  -1    4.78    1.60 
  -1   7   1    5.19    1.73 
  -1   7   1    8.05    1.96 
   0  -7  -1   24.07    3.61 
   0  -7  -1   26.28    2.54 
   0   7   1   26.93    2.77 
   0   7   1   25.26    2.43 
  -1  -7  -1   60.35    5.25 
  -1  -7  -1   64.05    3.70 
   1   7   1   63.21    3.92 
   1   7   1   61.59    3.25 
  -2  -7  -1   44.39    3.74 
   2   7   1   42.80    2.70 
   2   7   1   46.86    3.53 
  -3  -7  -1  103.49    5.61 
   3   7   1  102.87    5.25 
   3   7   1  102.83    4.03 
  -4  -7  -1  264.83   10.02 
   4   7   1  295.37    7.99 
   4   7   1  287.62    9.73 
  -5  -7  -1   -0.45    2.62 
   5   7   1   -0.51    1.59 
   5   7   1   -1.17    2.11 
   5   7   1   -1.18    1.13 
  -6  -7  -1   49.08    5.62 
   6   7   1   52.07    4.29 
   6   7   1   44.93    5.19 
   6   7   1   57.40    3.30 
  -7  -7  -1   55.55    6.83 
   7   7   1   40.84    5.47 
   7   7   1   60.05    4.60 
  -8  -7  -1   19.48    5.26 
   8   7   1   27.06    3.35 
   8   7   1   12.11    3.59 
  -9  -7  -1   34.23    6.48 
   9   7   1   41.07    4.01 
   9   7   1   39.05    5.45 
 -10  -7  -1    1.05    4.19 
  10   7   1    0.67    2.37 
  10   7   1    1.27    1.77 
 -11  -7  -1   21.18    6.34 
  11   7   1   12.29    4.56 
  11   7   1   21.35    3.69 
 -12  -7  -1   19.39    6.58 
  12   7   1    5.87    3.53 
  12   7   1    7.23    2.57 
  12  -8  -1   -0.23    3.08 
  12  -8  -1    0.67    3.73 
 -12   8   1   -3.14    2.94 
  11  -8  -1   -0.61    2.61 
  11  -8  -1   -1.18    2.86 
 -11   8   1   -1.40    2.87 
  10  -8  -1    4.90    3.46 
  10  -8  -1   -1.69    2.45 
 -10   8   1    0.58    3.07 
   9  -8  -1   14.77    3.84 
   9  -8  -1   21.89    5.28 
  -9   8   1   27.45    5.15 
   8  -8  -1   15.07    4.36 
   8  -8  -1   11.66    3.30 
  -8   8   1   18.19    4.23 
   7  -8  -1   35.41    4.24 
   7  -8  -1   43.18    5.83 
  -7   8   1   39.53    5.04 
  -7   8   1   40.12    2.73 
   6  -8  -1   10.32    3.06 
   6  -8  -1    5.24    3.63 
  -6   8   1    9.23    3.34 
  -6   8   1    4.50    1.67 
   5  -8  -1    4.79    3.45 
   5  -8  -1   10.18    2.72 
  -5   8   1   10.36    2.10 
  -5   8   1    6.67    2.98 
   4  -8  -1  132.62    7.69 
   4  -8  -1  140.14    6.06 
  -4   8   1  120.86    5.32 
  -4   8   1  130.99    6.99 
   3  -8  -1   -2.35    2.23 
   3  -8  -1    1.20    1.49 
  -3   8   1   -0.79    1.18 
  -3   8   1    0.14    1.75 
   2  -8  -1  161.16    5.91 
   2  -8  -1  162.02    8.08 
  -2   8   1  165.44    6.52 
  -2   8   1  166.63    6.93 
   1  -8  -1    1.04    2.57 
   1  -8  -1    2.34    1.52 
  -1   8   1    3.17    1.77 
  -1   8   1    5.13    1.94 
   0  -8  -1   -1.10    2.23 
   0  -8  -1   -0.41    1.46 
   0   8   1    1.87    1.48 
   0   8   1   -1.24    1.17 
  -1  -8  -1   35.11    4.62 
  -1  -8  -1   37.15    3.29 
   1   8   1   39.32    3.55 
   1   8   1   35.51    2.80 
  -2  -8  -1   33.21    3.83 
  -2  -8  -1   43.85    5.27 
   2   8   1   42.89    3.77 
   2   8   1   36.14    2.68 
  -3  -8  -1   83.12    5.53 
   3   8   1   80.40    4.95 
   3   8   1   79.10    3.66 
  -4  -8  -1   46.55    5.04 
   4   8   1   52.94    3.02 
   4   8   1   45.06    4.06 
  -5  -8  -1   13.82    3.97 
   5   8   1   18.23    2.17 
   5   8   1   18.83    3.37 
  -6  -8  -1    0.08    3.55 
   6   8   1   -1.06    1.88 
   6   8   1    4.02    2.96 
   6   8   1    2.53    1.56 
  -7  -8  -1    5.59    4.16 
   7   8   1    5.57    3.18 
   7   8   1    4.82    2.35 
  -8  -8  -1    7.61    4.12 
   8   8   1    5.98    3.26 
   8   8   1    7.95    2.41 
  -9  -8  -1   15.59    5.14 
   9   8   1   37.68    4.07 
   9   8   1   22.86    5.29 
 -10  -8  -1    1.41    4.14 
  10   8   1    5.26    2.38 
  10   8   1    2.79    3.17 
 -11  -8  -1    4.90    4.93 
  11   8   1    6.49    3.79 
  11   8   1    4.47    2.45 
  11  -9  -1    1.67    3.08 
  11  -9  -1   -0.56    3.20 
 -11   9   1    0.36    3.29 
  10  -9  -1    4.22    3.64 
  10  -9  -1    2.65    3.02 
 -10   9   1    4.75    3.40 
   9  -9  -1    0.54    3.15 
   9  -9  -1    1.81    2.75 
  -9   9   1    3.06    3.12 
   8  -9  -1    4.17    3.32 
   8  -9  -1   12.61    3.57 
  -8   9   1    4.94    3.24 
   7  -9  -1   -0.55    2.86 
   7  -9  -1   -0.55    1.87 
  -7   9   1   -0.10    1.24 
  -7   9   1   -2.45    2.14 
   6  -9  -1    4.33    3.29 
   6  -9  -1   -3.06    1.85 
  -6   9   1   -0.45    1.35 
  -6   9   1   -2.73    2.22 
   5  -9  -1    2.76    3.09 
   5  -9  -1   -1.85    1.78 
  -5   9   1    0.77    2.69 
  -5   9   1    1.42    1.43 
   4  -9  -1    7.81    3.85 
   4  -9  -1    6.48    2.24 
  -4   9   1   12.86    3.27 
   3  -9  -1    5.91    3.29 
   3  -9  -1    4.47    1.90 
  -3   9   1    3.83    2.34 
  -3   9   1    8.53    2.27 
   2  -9  -1    4.19    3.28 
   2  -9  -1    2.31    1.69 
  -2   9   1   -1.16    1.58 
  -2   9   1    2.09    1.80 
   1  -9  -1   33.37    2.97 
   1  -9  -1   29.89    4.72 
  -1   9   1   32.06    3.44 
  -1   9   1   27.48    3.10 
   0  -9  -1    7.81    3.30 
   0  -9  -1    7.85    2.10 
   0   9   1    6.07    2.30 
   0   9   1   10.72    2.45 
  -1  -9  -1   42.17    5.39 
  -1  -9  -1   45.03    4.00 
   1   9   1   43.78    3.23 
   1   9   1   33.09    3.63 
  -2  -9  -1    3.47    2.61 
  -2  -9  -1    6.88    3.62 
   2   9   1    3.32    2.01 
   2   9   1    9.03    1.96 
  -3  -9  -1   14.60    3.86 
   3   9   1   16.93    3.30 
   3   9   1   12.76    2.15 
  -4  -9  -1    1.52    3.09 
   4   9   1   -0.11    1.33 
   4   9   1   -2.81    1.75 
  -5  -9  -1    3.33    3.68 
   5   9   1   -2.36    1.20 
   5   9   1   -2.61    1.67 
  -6  -9  -1   20.77    4.86 
   6   9   1   17.91    2.33 
   6   9   1   20.93    3.82 
  -7  -9  -1    3.20    3.10 
   7   9   1    2.36    1.93 
   7   9   1   -0.72    2.56 
  -8  -9  -1   22.39    5.48 
   8   9   1   22.34    4.02 
   8   9   1   27.19    5.78 
  -9  -9  -1    1.61    3.83 
   9   9   1    0.76    1.84 
   9   9   1    0.71    3.02 
 -10  -9  -1   13.49    5.69 
  10   9   1   22.83    5.97 
  10   9   1   12.91    3.24 
 -11  -9  -1   -3.13    4.34 
  11   9   1    1.42    3.43 
  11   9   1   -1.89    2.06 
  11 -10  -1   -1.43    3.05 
  11 -10  -1    4.28    3.66 
  10 -10  -1    1.12    2.64 
  10 -10  -1    0.41    3.37 
 -10  10   1   -2.26    2.60 
   9 -10  -1    0.16    3.36 
   9 -10  -1    4.81    2.90 
  -9  10   1   10.07    3.87 
   8 -10  -1    6.86    3.11 
   8 -10  -1   11.10    4.28 
  -8  10   1   10.09    3.71 
   7 -10  -1    1.21    3.42 
   7 -10  -1    0.62    2.12 
  -7  10   1    0.22    2.55 
   6 -10  -1   29.76    5.57 
   6 -10  -1   29.11    3.89 
  -6  10   1   40.40    5.05 
  -6  10   1   37.75    3.25 
   5 -10  -1    6.75    2.43 
   5 -10  -1   12.60    4.14 
  -5  10   1    5.30    2.89 
  -5  10   1    6.88    2.02 
   4 -10  -1   11.34    4.49 
   4 -10  -1    2.45    2.22 
  -4  10   1   11.51    3.17 
  -4  10   1    7.21    2.25 
   3 -10  -1   16.40    4.46 
   3 -10  -1   16.12    2.87 
  -3  10   1   17.17    3.07 
  -3  10   1   17.33    3.47 
   2 -10  -1   25.67    3.04 
   2 -10  -1   25.60    5.08 
  -2  10   1   29.18    3.69 
  -2  10   1   26.28    3.32 
   1 -10  -1   71.60    4.43 
   1 -10  -1   64.84    6.49 
  -1  10   1   76.35    5.13 
  -1  10   1   67.50    4.66 
   0 -10  -1    0.36    3.17 
   0 -10  -1    6.26    2.38 
   0  10   1    6.07    2.13 
   0  10   1    2.96    2.08 
  -1 -10  -1   22.11    5.02 
  -1 -10  -1   25.55    3.64 
   1  10   1   19.97    2.68 
   1  10   1   27.27    3.80 
  -2 -10  -1    9.64    3.23 
  -2 -10  -1    7.64    4.17 
   2  10   1    4.36    2.45 
   2  10   1    7.28    2.13 
  -3 -10  -1   11.10    4.98 
  -3 -10  -1   10.36    3.69 
   3  10   1    8.87    3.02 
   3  10   1   11.73    2.17 
  -4 -10  -1   -1.24    3.35 
   4  10   1   -1.80    1.75 
   4  10   1    2.68    1.55 
  -5 -10  -1   -0.18    2.84 
   5  10   1   -1.86    1.07 
   5  10   1   -1.27    1.77 
  -6 -10  -1    3.93    3.29 
   6  10   1    6.96    2.61 
  -7 -10  -1   25.42    5.26 
   7  10   1   16.56    3.56 
  -8 -10  -1    5.48    4.06 
   8  10   1    6.12    2.58 
  -9 -10  -1    4.47    3.98 
   9  10   1    4.43    2.63 
   9  10   1    6.18    3.83 
 -10 -10  -1    0.14    3.78 
  10  10   1   -1.39    2.13 
  10  10   1    4.95    3.91 
  10 -11  -1   17.12    4.24 
  10 -11  -1   12.80    4.76 
 -10  11   1    5.06    3.41 
   9 -11  -1    2.21    2.66 
   9 -11  -1    8.39    3.97 
  -9  11   1    2.18    3.25 
   8 -11  -1    2.50    3.53 
   8 -11  -1   12.87    3.82 
  -8  11   1   11.05    3.88 
   7 -11  -1   -1.53    3.07 
   7 -11  -1   -1.57    2.24 
  -7  11   1    1.23    2.65 
   6 -11  -1   12.85    4.47 
   6 -11  -1    9.23    2.90 
  -6  11   1   15.72    2.83 
  -6  11   1    9.48    3.44 
   5 -11  -1    0.86    2.01 
   5 -11  -1    1.86    2.92 
  -5  11   1    2.00    1.77 
  -5  11   1    2.61    2.35 
   4 -11  -1    4.59    2.06 
   4 -11  -1    0.16    3.48 
  -4  11   1    1.55    2.39 
  -4  11   1    4.23    2.12 
   3 -11  -1   26.43    3.26 
   3 -11  -1   22.91    4.89 
  -3  11   1   24.05    3.50 
  -3  11   1   20.93    3.74 
   2 -11  -1    3.03    3.75 
   2 -11  -1   11.69    2.62 
  -2  11   1    7.97    2.87 
  -2  11   1    9.84    2.82 
   1 -11  -1    9.81    2.72 
   1 -11  -1    3.45    4.10 
  -1  11   1    7.22    2.53 
  -1  11   1    6.65    2.46 
   0 -11  -1    3.73    3.51 
   0 -11  -1    3.51    2.30 
   0  11   1    4.24    2.19 
   0  11   1   11.13    2.96 
  -1 -11  -1   18.31    3.61 
  -1 -11  -1   15.34    4.84 
   1  11   1   19.57    3.69 
   1  11   1   22.31    2.91 
  -2 -11  -1    5.01    3.15 
  -2 -11  -1    2.02    3.99 
   2  11   1    4.12    1.75 
   2  11   1    6.22    2.61 
  -3 -11  -1   19.28    5.35 
  -3 -11  -1   16.00    3.77 
   3  11   1   18.30    2.34 
   3  11   1   13.60    3.34 
  -4 -11  -1   -2.76    3.07 
   4  11   1    2.14    1.44 
   4  11   1   -1.10    1.62 
  -5 -11  -1    9.89    4.13 
   5  11   1    2.71    2.22 
  -6 -11  -1    5.47    3.88 
   6  11   1    2.51    2.46 
  -7 -11  -1   -1.05    3.60 
   7  11   1    5.31    2.75 
  -8 -11  -1    3.94    4.15 
   8  11   1    9.26    3.25 
  -9 -11  -1    7.08    4.44 
   9  11   1    5.65    2.72 
   9 -12  -1    5.15    4.41 
  -9  12   1    3.53    3.25 
   8 -12  -1   -3.33    2.96 
   8 -12  -1    1.09    2.94 
  -8  12   1    6.08    3.81 
   7 -12  -1    8.93    3.55 
   7 -12  -1    5.81    3.97 
  -7  12   1    0.49    2.80 
   6 -12  -1    5.95    4.19 
  -6  12   1    7.30    2.42 
  -6  12   1   12.68    3.78 
   5 -12  -1    2.78    3.24 
  -5  12   1    0.63    2.54 
  -5  12   1    1.15    1.89 
   4 -12  -1   21.21    5.17 
  -4  12   1   20.04    3.58 
  -4  12   1   20.51    4.06 
   3 -12  -1    5.38    3.65 
  -3  12   1   -0.46    1.78 
  -3  12   1    4.19    2.43 
   2 -12  -1    5.55    3.68 
  -2  12   1    0.95    1.90 
  -2  12   1    1.72    2.11 
   1 -12  -1   -1.00    3.27 
  -1  12   1    3.45    2.15 
  -1  12   1   -0.58    1.90 
   0 -12  -1   -1.24    3.54 
   0  12   1    1.81    2.10 
   0  12   1    0.78    1.68 
  -1 -12  -1   38.12    6.72 
  -1 -12  -1   32.94    4.08 
   1  12   1   27.90    4.10 
   1  12   1   28.27    3.14 
  -2 -12  -1    6.43    4.19 
  -2 -12  -1    9.09    3.21 
   2  12   1    5.20    1.90 
   2  12   1    8.63    2.83 
  -3 -12  -1    0.74    2.77 
  -3 -12  -1    7.12    4.49 
   3  12   1   -1.35    1.93 
   3  12   1   -2.13    1.27 
  -4 -12  -1    1.10    3.80 
  -4 -12  -1   -0.31    2.93 
   4  12   1   -1.30    1.85 
  -5 -12  -1    5.42    3.93 
   5  12   1    1.62    2.41 
  -6 -12  -1   16.91    4.87 
   6  12   1   17.70    4.04 
  -7 -12  -1    3.39    4.10 
   7  12   1   -0.28    2.18 
  -8 -12  -1    5.21    4.49 
   8  12   1    0.31    2.06 
   8 -13  -1    0.48    3.85 
  -8  13   1   -1.42    2.39 
   7 -13  -1   12.17    4.89 
  -7  13   1    9.21    3.99 
   6 -13  -1   17.83    5.08 
  -6  13   1   10.07    3.79 
  -6  13   1   12.33    2.97 
   5 -13  -1    1.68    3.33 
  -5  13   1    0.30    2.21 
  -5  13   1   -0.89    1.67 
   4 -13  -1    4.40    4.20 
  -4  13   1    1.69    2.39 
  -4  13   1    2.89    2.12 
   3 -13  -1    2.85    3.39 
  -3  13   1    1.34    2.32 
  -3  13   1    2.33    2.26 
   2 -13  -1    3.08    3.95 
  -2  13   1    1.18    2.09 
  -2  13   1   -0.22    1.95 
   1 -13  -1   18.89    4.97 
  -1  13   1   25.80    4.38 
  -1  13   1   20.22    3.47 
   0 -13  -1   -6.62    3.32 
   0  13   1    0.98    1.79 
   0  13   1    1.94    2.31 
  -1 -13  -1    4.52    3.93 
   1  13   1    5.02    2.07 
   1  13   1    0.76    2.11 
  -2 -13  -1    1.62    3.85 
   2  13   1   -2.92    1.82 
   2  13   1    1.81    1.57 
  -3 -13  -1   22.54    6.22 
   3  13   1   14.85    3.72 
  -4 -13  -1   -0.12    4.38 
   4  13   1    1.42    2.55 
  -5 -13  -1    2.45    5.16 
   5  13   1    1.15    2.39 
   6  13   1    6.20    2.98 
  -7 -13  -1    6.26    4.64 
   7  13   1    0.57    2.27 
   6 -14  -1    0.85    3.30 
  -6  14   1   -1.40    2.03 
  -6  14   1    2.37    2.71 
   5 -14  -1    3.75    3.65 
  -5  14   1    9.99    3.82 
  -5  14   1    8.24    3.13 
   4 -14  -1   13.01    4.95 
  -4  14   1    4.32    2.57 
  -4  14   1    9.49    3.37 
   3 -14  -1   21.45    5.94 
  -3  14   1   22.27    4.09 
   2 -14  -1    6.05    4.51 
  -2  14   1   13.24    3.37 
  -2  14   1    5.24    2.83 
   1 -14  -1   -0.07    3.62 
  -1  14   1    3.28    2.13 
  -1  14   1    5.20    2.84 
   0 -14  -1   14.67    5.50 
   0  14   1    7.34    3.12 
   0  14   1   15.88    2.94 
  -1 -14  -1    1.72    4.53 
   1  14   1    1.07    2.20 
   1  14   1    6.80    2.19 
  -2 -14  -1   28.43    6.63 
   2  14   1   17.12    4.33 
  -3 -14  -1    1.14    4.18 
   3  14   1   -1.25    1.92 
  -4 -14  -1   -2.07    3.78 
   4  14   1    2.06    2.61 
  -5 -14  -1   -1.96    3.71 
   5  14   1   -0.02    2.26 
  -6 -14  -1    5.74    5.05 
   6  14   1   -1.15    2.32 
   5 -15  -1   10.47    4.95 
   4 -15  -1    9.69    5.28 
  -4  15   1    0.53    2.66 
  -4  15   1    0.65    2.23 
   3 -15  -1   10.24    4.96 
  -3  15   1   14.39    3.50 
  -3  15   1   16.45    3.92 
   2 -15  -1    1.62    3.81 
  -2  15   1    6.86    2.70 
  -2  15   1    2.05    2.51 
   1 -15  -1    7.05    4.73 
  -1  15   1    1.33    2.09 
  -1  15   1   -0.11    2.06 
   0 -15  -1   13.14    5.77 
   0  15   1   22.99    3.58 
   0  15   1   21.07    4.57 
  -1 -15  -1   -0.13    4.56 
   1  15   1    3.00    2.41 
  -2 -15  -1   18.78    6.30 
   2  15   1    9.81    3.52 
  -3 -15  -1    3.53    4.57 
   3  15   1    2.80    2.82 
  -4 -15  -1   -1.00    4.53 
   4  15   1   -1.61    2.01 
   1  15  -2   -1.09    2.43 
  -1 -15   2   -1.08    3.81 
   0  15  -2    0.30    2.21 
   0 -15   2    0.14    4.77 
  -1  15  -2    3.08    2.92 
   1 -15   2   -1.29    4.17 
  -2  15  -2    5.36    3.28 
   2 -15   2    5.79    4.58 
  -3  15  -2    4.91    2.91 
  -3  15  -2    5.26    2.87 
   3 -15   2   -4.94    3.19 
   4 -15   2   -7.69    3.09 
   4  14  -2   -1.23    2.26 
  -4 -14   2    4.35    4.49 
  -4 -14   2    0.04    4.32 
   3  14  -2    4.97    2.97 
  -3 -14   2    0.99    4.48 
  -3 -14   2    4.34    3.88 
   2  14  -2   18.80    4.31 
  -2 -14   2   27.58    5.80 
  -2 -14   2   19.34    6.51 
   1  14  -2    3.84    3.04 
  -1 -14   2   10.88    4.92 
  -1 -14   2    8.30    4.53 
   0  14  -2    3.51    2.71 
   0 -14   2    4.69    3.60 
   0 -14   2   -2.31    3.51 
  -1  14  -2    4.41    2.83 
   1 -14   2    3.27    4.36 
  -2  14  -2   14.47    3.77 
  -2  14  -2   17.41    3.43 
   2 -14   2   18.61    5.50 
  -3  14  -2   34.19    4.44 
  -3  14  -2   20.61    4.28 
   3 -14   2   21.65    5.71 
  -4  14  -2    2.11    2.41 
  -4  14  -2    1.85    2.29 
   4 -14   2   -0.38    3.44 
  -5  14  -2    6.73    3.17 
  -5  14  -2    6.72    3.02 
   5 -14   2    2.28    4.24 
  -6  14  -2    5.14    2.70 
  -6  14  -2    9.63    3.67 
   6 -14   2    5.64    4.11 
   6  13  -2    4.48    3.33 
  -6 -13   2    9.76    4.59 
   5  13  -2   -0.88    2.58 
  -5 -13   2    4.12    3.69 
   4  13  -2   10.68    3.13 
  -4 -13   2    3.74    4.04 
  -4 -13   2    9.53    5.62 
   3  13  -2   11.12    3.46 
  -3 -13   2   23.83    5.68 
  -3 -13   2   17.82    5.85 
   2  13  -2    2.59    2.63 
  -2 -13   2    7.89    4.81 
  -2 -13   2    8.58    4.23 
   1  13  -2    9.28    3.61 
  -1 -13   2   12.97    5.16 
  -1 -13   2   20.26    5.09 
   0  13  -2   -0.49    2.47 
   0 -13   2    0.59    3.04 
   0 -13   2   10.02    3.90 
  -1  13  -2    4.54    2.27 
  -1  13  -2   11.88    3.47 
   1 -13   2   12.67    3.99 
   1 -13   2    1.02    4.32 
  -2  13  -2   16.00    3.19 
  -2  13  -2   13.84    3.76 
   2 -13   2   13.23    4.95 
   2 -13   2   14.19    3.97 
  -3  13  -2   -2.18    2.02 
  -3  13  -2    0.17    1.98 
   3 -13   2   -0.86    3.22 
   3 -13   2    4.39    3.10 
  -4  13  -2   11.89    3.47 
  -4  13  -2   11.01    3.33 
   4 -13   2   11.12    3.39 
   4 -13   2    5.53    4.11 
  -5  13  -2    0.23    2.27 
  -5  13  -2   -0.39    2.34 
   5 -13   2    2.84    3.93 
   5 -13   2    3.53    3.11 
  -6  13  -2    0.33    2.23 
  -6  13  -2   -2.62    2.22 
   6 -13   2   -3.62    2.37 
   6 -13   2   -1.55    3.32 
  -7  13  -2    4.86    3.32 
  -7  13  -2    6.47    2.67 
   7 -13   2    0.82    3.62 
   7 -13   2    2.09    2.91 
  -8  13  -2   -0.25    2.65 
   8 -13   2    9.07    3.96 
   8 -13   2    3.46    3.47 
   7  12  -2    2.89    2.75 
  -7 -12   2    0.25    4.37 
   6  12  -2    0.29    2.41 
  -6 -12   2    3.49    4.68 
   5  12  -2    1.96    2.63 
  -5 -12   2    1.77    3.85 
   4  12  -2    7.35    3.13 
  -4 -12   2    0.62    3.38 
   3  12  -2   -0.28    2.02 
  -3 -12   2    0.58    3.49 
  -3 -12   2    2.81    4.72 
   2  12  -2   -0.46    1.71 
  -2 -12   2   10.19    4.86 
  -2 -12   2    6.76    3.87 
   1  12  -2    9.79    3.10 
  -1 -12   2   -1.27    2.79 
  -1 -12   2   11.33    4.86 
   0  12  -2    4.63    1.80 
   0  12  -2    3.06    2.36 
   0 -12   2   11.34    3.94 
   0 -12   2   -3.59    2.76 
  -1  12  -2    3.54    2.28 
  -1  12  -2    0.34    1.63 
   1 -12   2    5.85    4.02 
   1 -12   2    2.16    2.78 
  -2  12  -2    1.77    1.98 
  -2  12  -2    2.06    1.93 
   2 -12   2    0.98    3.54 
   2 -12   2    4.37    2.85 
  -3  12  -2   23.49    4.04 
  -3  12  -2   34.83    4.18 
   3 -12   2   35.38    4.79 
   3 -12   2   30.82    5.69 
  -4  12  -2   14.71    3.44 
  -4  12  -2    7.95    3.01 
   4 -12   2   10.67    4.10 
   4 -12   2   14.23    3.82 
  -5  12  -2   11.80    3.04 
  -5  12  -2    9.57    3.69 
   5 -12   2    7.00    3.16 
   5 -12   2    2.50    3.98 
  -6  12  -2    3.27    2.47 
  -6  12  -2    4.91    3.14 
   6 -12   2    6.43    3.96 
   6 -12   2   -0.40    2.80 
  -7  12  -2    3.49    3.10 
  -7  12  -2   -0.70    1.77 
   7 -12   2    2.23    3.42 
   7 -12   2    4.01    2.93 
  -8  12  -2    6.10    3.72 
   8 -12   2   10.26    4.27 
   8 -12   2    2.83    2.95 
  -9  12  -2    2.48    3.26 
   9 -12   2   -3.05    3.05 
   9 -12   2    1.72    2.98 
   8  11  -2   15.12    3.82 
  -8 -11   2   14.16    5.66 
   7  11  -2    1.09    2.53 
  -7 -11   2   -1.58    3.99 
   6  11  -2    0.20    2.41 
  -6 -11   2    7.13    4.90 
   5  11  -2   -2.54    1.76 
  -5 -11   2    0.17    4.12 
   4  11  -2   16.75    3.72 
  -4 -11   2    6.82    4.00 
   3  11  -2   21.47    4.07 
  -3 -11   2   19.08    4.91 
   2  11  -2    1.68    2.15 
  -2 -11   2    4.02    3.41 
  -2 -11   2   -2.41    3.08 
   1  11  -2    3.79    2.34 
   1  11  -2    1.46    1.35 
  -1 -11   2    0.25    3.70 
  -1 -11   2    6.14    3.54 
   0  11  -2    3.66    1.70 
   0  11  -2    7.37    2.63 
   0 -11   2   -3.22    3.14 
   0 -11   2    0.97    2.86 
  -1  11  -2   -1.32    1.40 
  -1  11  -2   -2.38    1.70 
   1 -11   2   -0.62    2.47 
   1 -11   2    1.56    3.35 
  -2  11  -2    3.17    2.23 
  -2  11  -2   -0.97    1.65 
   2 -11   2    0.73    2.47 
   2 -11   2   -0.53    3.23 
  -3  11  -2    1.78    2.12 
  -3  11  -2    3.18    2.35 
   3 -11   2    5.13    3.59 
   3 -11   2    2.14    2.61 
  -4  11  -2    6.26    2.59 
  -4  11  -2    1.46    1.80 
   4 -11   2    2.45    2.74 
   4 -11   2    2.49    3.37 
  -5  11  -2   12.27    3.63 
  -5  11  -2    8.96    2.75 
   5 -11   2    3.26    3.67 
   5 -11   2    8.72    3.24 
  -6  11  -2    4.43    3.31 
  -6  11  -2   -0.69    1.59 
   6 -11   2    1.83    2.59 
   6 -11   2   -0.69    2.71 
  -7  11  -2    7.18    2.50 
  -7  11  -2    8.72    3.79 
   7 -11   2    2.87    3.41 
   7 -11   2   -0.02    2.67 
  -8  11  -2   -0.51    3.32 
   8 -11   2   -2.83    2.77 
   8 -11   2    3.08    2.66 
  -9  11  -2    5.95    3.66 
   9 -11   2   -0.18    2.76 
   9 -11   2    1.61    3.19 
 -10  11  -2    1.10    3.49 
  10 -11   2    3.17    3.41 
  10 -11   2   -3.78    2.61 
   9  10  -2   -0.59    3.30 
   9  10  -2   -2.05    2.15 
  -9 -10   2    5.31    4.75 
   8  10  -2   -2.59    1.93 
   8  10  -2    0.22    3.11 
  -8 -10   2    2.12    4.59 
   7  10  -2   17.03    4.94 
   7  10  -2   30.86    4.31 
  -7 -10   2   17.73    5.62 
   6  10  -2   14.03    3.57 
  -6 -10   2   10.92    4.48 
   5  10  -2   17.99    3.59 
  -5 -10   2   21.81    5.26 
   4  10  -2    4.56    2.42 
  -4 -10   2    8.47    4.29 
   3  10  -2    6.53    2.60 
  -3 -10   2   12.32    4.22 
   2  10  -2   26.28    2.13 
   2  10  -2   24.22    3.56 
  -2 -10   2   29.58    5.33 
   1  10  -2    0.43    1.35 
   1  10  -2   -2.53    1.49 
  -1 -10   2    0.11    3.58 
  -1 -10   2   -0.70    3.21 
   0  10  -2   43.81    3.42 
   0  10  -2   55.07    4.80 
   0 -10   2   48.36    5.45 
   0 -10   2   46.52    6.37 
  -1  10  -2    4.11    2.26 
  -1  10  -2    6.46    2.49 
   1 -10   2    5.37    3.37 
   1 -10   2    1.86    3.36 
  -2  10  -2   12.86    2.82 
  -2  10  -2    7.78    2.71 
   2 -10   2   14.44    3.86 
   2 -10   2   15.40    4.61 
  -3  10  -2    2.76    2.45 
  -3  10  -2    0.50    1.82 
   3 -10   2   -0.59    2.41 
   3 -10   2    4.79    3.66 
  -4  10  -2    8.19    3.19 
  -4  10  -2    8.03    2.30 
   4 -10   2    2.67    2.73 
   4 -10   2   14.34    4.17 
  -5  10  -2    7.74    2.28 
  -5  10  -2   16.79    4.00 
   5 -10   2   11.63    3.43 
   5 -10   2    7.99    3.83 
  -6  10  -2   14.04    2.75 
  -6  10  -2   16.03    4.09 
   6 -10   2    5.96    3.48 
   6 -10   2   16.98    3.69 
  -7  10  -2    0.48    1.67 
  -7  10  -2   -0.44    2.61 
   7 -10   2    1.40    2.95 
   7 -10   2   -0.13    2.24 
  -8  10  -2   30.18    5.41 
   8 -10   2   14.87    4.29 
   8 -10   2   18.77    4.86 
  -9  10  -2    5.56    3.88 
   9 -10   2   -1.80    2.94 
   9 -10   2    2.63    2.91 
 -10  10  -2    1.37    3.17 
  10 -10   2   -2.32    2.73 
  10 -10   2   -2.48    2.51 
 -11  10  -2   23.25    5.11 
  11 -10   2   23.04    5.22 
  11 -10   2   22.43    5.39 
  10   9  -2    0.51    2.29 
  10   9  -2    2.51    3.49 
 -10  -9   2    9.82    5.85 
   9   9  -2   -1.71    1.85 
   9   9  -2   -0.24    3.15 
  -9  -9   2   -7.18    4.15 
   8   9  -2    8.21    3.75 
   8   9  -2    7.74    2.46 
  -8  -9   2   13.82    5.20 
   7   9  -2    4.21    2.31 
   7   9  -2    3.61    3.25 
  -7  -9   2    5.50    4.16 
   6   9  -2    4.54    3.59 
   6   9  -2    6.69    2.74 
  -6  -9   2    8.76    4.37 
   5   9  -2    2.67    2.88 
   5   9  -2    1.28    2.02 
  -5  -9   2    3.15    3.96 
   4   9  -2   12.61    3.07 
  -4  -9   2   16.75    5.23 
   3   9  -2   47.22    4.35 
  -3  -9   2   41.61    6.44 
   2   9  -2   -0.98    1.72 
   2   9  -2    3.36    1.10 
  -2  -9   2    3.79    3.50 
   1   9  -2   25.51    3.44 
   1   9  -2   13.97    1.94 
  -1  -9   2   18.02    4.30 
  -1  -9   2   18.45    5.32 
   0   9  -2   48.22    4.24 
   0   9  -2   46.90    3.20 
   0  -9   2   36.79    4.89 
   0  -9   2   37.46    5.69 
  -1   9  -2    2.01    2.01 
  -1   9  -2    4.87    2.04 
   1  -9   2    4.52    2.98 
   1  -9   2    8.13    3.64 
  -2   9  -2   11.12    2.69 
  -2   9  -2   17.25    3.05 
   2  -9   2   15.56    3.71 
   2  -9   2   12.93    4.12 
  -3   9  -2   66.70    4.61 
  -3   9  -2   65.83    5.08 
   3  -9   2   67.41    5.30 
   3  -9   2   67.86    6.18 
  -4   9  -2    9.09    3.14 
  -4   9  -2   13.93    2.73 
   4  -9   2   13.02    3.51 
   4  -9   2   12.33    3.82 
  -5   9  -2   31.62    3.36 
  -5   9  -2   45.15    5.30 
   5  -9   2   33.94    5.44 
   5  -9   2   38.27    4.48 
  -6   9  -2    2.53    2.74 
  -6   9  -2    0.62    1.53 
   6  -9   2    0.65    2.59 
   6  -9   2    5.60    3.24 
  -7   9  -2    0.62    2.49 
  -7   9  -2   -0.22    1.52 
   7  -9   2   -2.70    2.23 
   7  -9   2    2.56    2.40 
  -8   9  -2   19.98    4.73 
   8  -9   2   21.30    4.45 
   8  -9   2   18.02    4.76 
  -9   9  -2    1.29    3.04 
   9  -9   2    0.30    2.93 
   9  -9   2    2.34    3.17 
 -10   9  -2    5.21    3.36 
  10  -9   2    0.41    2.95 
  10  -9   2   -0.05    2.81 
 -11   9  -2   10.96    4.28 
  11  -9   2   -0.26    3.11 
  11  -9   2    5.01    3.37 
  12  -9   2    2.67    2.88 
  10   8  -2    1.80    3.24 
  10   8  -2    1.32    2.12 
 -10  -8   2   -1.78    4.05 
   9   8  -2   -0.52    2.78 
   9   8  -2    3.03    2.44 
  -9  -8   2    6.55    4.70 
   8   8  -2    0.31    1.90 
   8   8  -2   -0.59    2.54 
  -8  -8   2    7.01    4.73 
   7   8  -2   -0.44    2.68 
   7   8  -2    2.11    1.86 
  -7  -8   2   -0.03    3.49 
   6   8  -2   -1.15    2.32 
   6   8  -2    0.41    1.76 
  -6  -8   2   -1.83    3.60 
   5   8  -2   11.07    2.79 
   5   8  -2   11.75    3.61 
  -5  -8   2    5.59    4.24 
   4   8  -2   34.88    5.19 
   4   8  -2   32.09    3.82 
  -4  -8   2   24.33    5.25 
   3   8  -2   22.98    3.40 
  -3  -8   2   22.96    4.81 
   2   8  -2    7.77    1.31 
   2   8  -2    7.96    2.49 
  -2  -8   2    2.40    3.22 
   1   8  -2    3.33    2.09 
   1   8  -2    1.84    1.20 
  -1  -8   2    3.41    2.93 
   0   8  -2    8.58    2.33 
   0   8  -2    5.73    1.72 
   0  -8   2    8.62    3.54 
   0  -8   2    3.42    2.70 
  -1   8  -2   43.15    3.79 
  -1   8  -2   52.39    3.58 
   1  -8   2   51.58    5.21 
   1  -8   2   59.48    4.90 
  -2   8  -2   42.01    3.70 
  -2   8  -2   33.48    3.47 
   2  -8   2   38.16    4.90 
   2  -8   2   35.03    4.08 
  -3   8  -2    9.34    2.72 
  -3   8  -2    9.34    2.54 
   3  -8   2    7.71    3.16 
   3  -8   2   12.30    3.07 
  -4   8  -2    6.36    2.81 
  -4   8  -2    1.53    1.70 
   4  -8   2    3.97    2.65 
   4  -8   2   -1.02    2.55 
  -5   8  -2    2.90    1.75 
  -5   8  -2    3.23    2.75 
   5  -8   2    4.27    3.26 
   5  -8   2   -1.35    2.05 
  -6   8  -2   22.35    4.59 
  -6   8  -2   11.70    2.32 
   6  -8   2    9.51    3.71 
   6  -8   2   11.49    3.48 
  -7   8  -2    8.88    2.05 
  -7   8  -2    6.01    3.40 
   7  -8   2    9.69    3.34 
   7  -8   2    6.51    3.71 
  -8   8  -2    4.05    2.91 
   8  -8   2    8.28    3.28 
   8  -8   2    9.15    3.64 
  -9   8  -2   30.07    5.42 
   9  -8   2   23.52    4.53 
   9  -8   2   29.49    4.86 
 -10   8  -2    0.04    2.95 
  10  -8   2   -2.19    2.23 
  10  -8   2    2.51    3.11 
 -11   8  -2   -1.16    2.79 
  11  -8   2    4.05    3.25 
  11  -8   2   -2.49    2.55 
 -12   8  -2    2.03    3.51 
  12  -8   2    0.79    3.13 
  12  -8   2    1.31    2.96 
  11   7  -2   15.02    3.36 
  11   7  -2   21.12    5.88 
 -11  -7   2   18.59    6.51 
  10   7  -2    7.01    2.38 
  10   7  -2    5.82    3.76 
 -10  -7   2   12.74    5.80 
   9   7  -2    1.90    2.96 
   9   7  -2   -2.80    1.63 
  -9  -7   2    3.54    4.78 
   8   7  -2    1.41    2.09 
   8   7  -2    3.78    2.94 
  -8  -7   2    7.74    4.47 
   7   7  -2    1.92    1.93 
   7   7  -2   -0.51    2.31 
  -7  -7   2    3.05    3.51 
   6   7  -2   41.10    3.96 
   6   7  -2   44.65    5.72 
  -6  -7   2   53.32    6.56 
   5   7  -2    3.34    2.22 
   5   7  -2    5.91    3.24 
  -5  -7   2    0.78    3.86 
   4   7  -2   50.76    4.21 
   4   7  -2   56.61    5.45 
  -4  -7   2   54.50    6.07 
   3   7  -2    7.59    2.45 
   3   7  -2   10.05    3.28 
  -3  -7   2    9.76    3.68 
   2   7  -2   68.77    2.48 
   2   7  -2   73.76    4.63 
  -2  -7   2   77.53    6.13 
   1   7  -2   52.24    3.89 
   1   7  -2   48.94    2.49 
  -1  -7   2   45.87    4.61 
   0   7  -2    0.10    1.05 
   0   7  -2   -0.58    1.43 
   0  -7   2   -0.11    2.11 
   0  -7   2   -1.36    2.07 
  -1   7  -2   97.56    5.08 
  -1   7  -2   99.18    4.64 
   1  -7   2  108.83    6.37 
   1  -7   2  109.99    5.97 
  -2   7  -2   86.18    4.64 
  -2   7  -2   78.80    4.50 
   2  -7   2   86.28    5.77 
   2  -7   2   83.76    5.25 
  -3   7  -2  163.34    6.98 
  -3   7  -2  166.46    6.51 
   3  -7   2  164.40    7.34 
   3  -7   2  175.90    7.77 
  -4   7  -2   18.77    2.44 
  -4   7  -2   15.50    3.13 
   4  -7   2   23.66    3.74 
   4  -7   2   22.74    3.70 
  -5   7  -2    4.67    2.64 
  -5   7  -2    0.90    1.37 
   5  -7   2   -0.60    2.15 
   5  -7   2   -1.34    2.34 
  -6   7  -2   51.53    3.20 
  -6   7  -2   53.52    5.51 
   6  -7   2   53.91    5.29 
   6  -7   2   49.19    4.76 
  -7   7  -2   44.73    5.38 
  -7   7  -2   54.49    3.13 
   7  -7   2   49.88    5.09 
   7  -7   2   54.93    5.65 
  -8   7  -2    3.53    3.34 
   8  -7   2    1.58    2.59 
   8  -7   2    0.47    2.83 
  -9   7  -2    2.03    2.77 
   9  -7   2    0.56    2.44 
   9  -7   2    0.46    2.57 
 -10   7  -2   11.23    3.94 
  10  -7   2    4.39    3.18 
  10  -7   2    4.55    3.15 
 -11   7  -2   54.11    6.50 
  11  -7   2   40.52    6.03 
  11  -7   2   39.17    5.53 
 -12   7  -2   -0.06    3.27 
  12  -7   2   -4.05    2.33 
  12  -7   2   -0.24    2.60 
 -13   7  -2   37.22    6.94 
  13  -7   2   24.06    5.88 
  13  -7   2   25.60    5.76 
  11   6  -2    2.97    1.75 
  11   6  -2    8.24    3.75 
 -11  -6   2    0.62    4.74 
  10   6  -2   31.61    6.35 
  10   6  -2   34.82    3.95 
 -10  -6   2   32.61    7.84 
   9   6  -2    7.97    2.49 
   9   6  -2    5.69    3.45 
  -9  -6   2    8.53    5.12 
   8   6  -2    6.98    3.26 
   8   6  -2    0.11    1.50 
  -8  -6   2    9.90    4.47 
   7   6  -2   10.20    3.66 
   7   6  -2   12.72    2.71 
  -7  -6   2    8.90    4.76 
   6   6  -2   19.23    3.16 
   6   6  -2   18.13    4.31 
  -6  -6   2   24.72    5.36 
   5   6  -2   73.07    6.14 
   5   6  -2   68.90    4.63 
  -5  -6   2   58.39    6.51 
   4   6  -2    2.49    1.66 
   4   6  -2    1.43    2.17 
  -4  -6   2    5.78    3.44 
   3   6  -2   59.19    4.94 
   3   6  -2   53.96    3.98 
  -3  -6   2   54.39    5.15 
   2   6  -2    3.59    0.72 
   2   6  -2    0.83    1.50 
   2   6  -2    5.23    2.37 
  -2  -6   2    5.69    3.00 
   1   6  -2   30.58    1.80 
   1   6  -2   29.56    2.92 
  -1  -6   2   29.44    3.80 
   0   6  -2    1.53    1.35 
   0   6  -2   -1.21    0.93 
   0  -6   2    0.41    1.97 
  -1   6  -2   -0.30    1.24 
  -1   6  -2    1.78    1.47 
   1  -6   2    1.43    2.23 
   1  -6   2    1.99    2.04 
  -2   6  -2   21.48    2.69 
  -2   6  -2   18.68    2.31 
   2  -6   2   15.93    2.82 
   2  -6   2   20.07    3.38 
  -3   6  -2  210.66    7.72 
  -3   6  -2  202.83    6.94 
   3  -6   2  201.05    7.93 
   3  -6   2  206.16    8.00 
  -4   6  -2    4.20    1.53 
  -4   6  -2    3.35    2.25 
   4  -6   2   -0.41    1.82 
   4  -6   2    4.08    2.30 
  -5   6  -2  138.69    5.13 
  -5   6  -2  137.62    6.95 
   5  -6   2  136.35    6.76 
   5  -6   2  128.84    6.58 
  -6   6  -2   16.89    2.19 
  -6   6  -2   13.24    3.63 
   6  -6   2   12.62    3.14 
   6  -6   2   18.72    3.70 
  -7   6  -2    3.28    2.88 
  -7   6  -2   -0.99    1.02 
   7  -6   2    3.83    2.95 
   7  -6   2    5.49    2.74 
  -8   6  -2   65.96    2.94 
  -8   6  -2   67.47    6.31 
   8  -6   2   64.70    5.81 
   8  -6   2   69.42    6.04 
  -9   6  -2    1.44    3.04 
   9  -6   2    0.29    2.44 
   9  -6   2    4.18    2.79 
 -10   6  -2    8.35    3.75 
  10  -6   2    4.43    3.04 
  10  -6   2   13.33    3.96 
 -11   6  -2   18.16    4.68 
  11  -6   2   15.27    4.54 
  11  -6   2   26.00    5.31 
 -12   6  -2    6.14    3.84 
  12  -6   2    1.59    2.87 
  12  -6   2   -1.98    2.68 
 -13   6  -2    1.56    3.64 
  13  -6   2    9.95    4.08 
  13  -6   2    5.70    4.06 
  12   5  -2    6.55    4.20 
 -12  -5   2    3.53    5.52 
  11   5  -2   -0.82    2.36 
 -11  -5   2   -2.24    4.43 
  10   5  -2   -0.08    2.76 
  10   5  -2    3.83    2.08 
 -10  -5   2   -2.75    4.25 
   9   5  -2    4.45    2.10 
   9   5  -2    5.10    3.25 
  -9  -5   2   10.35    4.96 
   8   5  -2   -2.97    1.76 
   8   5  -2   -1.49    1.30 
  -8  -5   2   -1.49    3.55 
   7   5  -2   -0.16    2.47 
   7   5  -2   -0.56    1.45 
  -7  -5   2   -0.86    3.82 
  -7  -5   2    1.93    1.47 
   6   5  -2   41.93    5.00 
   6   5  -2   48.44    3.78 
  -6  -5   2   42.55    2.07 
  -6  -5   2   41.55    5.97 
   5   5  -2   22.47    3.69 
   5   5  -2   15.08    2.78 
  -5  -5   2   14.53    4.28 
   4   5  -2    2.64    1.61 
   4   5  -2    3.35    2.23 
  -4  -5   2    3.21    2.81 
   3   5  -2   33.07    3.02 
   3   5  -2   33.75    3.67 
  -3  -5   2   26.73    4.19 
   2   5  -2    2.98    1.39 
   2   5  -2    0.16    1.65 
  -2  -5   2    0.62    2.30 
   1   5  -2  103.52    4.77 
   1   5  -2  102.39    3.13 
  -1  -5   2  103.23    5.61 
   0   5  -2    2.81    1.41 
   0   5  -2    4.44    1.25 
   0  -5   2    4.67    2.08 
  -1   5  -2    8.38    1.76 
  -1   5  -2    7.40    1.81 
   1  -5   2    7.16    2.26 
   1  -5   2    8.06    2.27 
  -2   5  -2    7.27    1.96 
  -2   5  -2    8.71    1.79 
   2  -5   2    6.82    2.16 
   2  -5   2    9.21    2.51 
  -3   5  -2   20.17    2.77 
  -3   5  -2   20.83    2.16 
   3  -5   2   16.47    2.71 
   3  -5   2   22.57    2.92 
  -4   5  -2   14.22    2.89 
  -4   5  -2   13.45    1.80 
   4  -5   2   14.79    2.79 
   4  -5   2   17.12    3.00 
  -5   5  -2    0.05    0.93 
  -5   5  -2   -1.38    1.88 
   5  -5   2   -0.64    1.46 
   5  -5   2   -0.95    1.73 
  -6   5  -2    2.98    1.15 
  -6   5  -2    4.73    2.53 
   6  -5   2   -0.97    1.95 
   6  -5   2    3.52    2.28 
  -7   5  -2   19.67    1.62 
  -7   5  -2   24.22    4.30 
   7  -5   2   13.67    3.34 
   7  -5   2   20.30    3.76 
  -8   5  -2    8.96    3.86 
   8  -5   2   11.07    3.51 
   8  -5   2   18.52    4.21 
  -9   5  -2   -4.61    2.79 
   9  -5   2    1.12    2.67 
   9  -5   2    6.40    3.17 
 -10   5  -2    0.65    3.11 
  10  -5   2    2.77    2.84 
  10  -5   2    3.78    3.11 
 -11   5  -2   11.27    4.58 
  11  -5   2    5.65    3.38 
  11  -5   2    4.05    3.20 
 -12   5  -2    5.40    3.73 
  12  -5   2    6.57    3.67 
  12  -5   2    1.54    2.79 
 -13   5  -2    4.80    3.86 
  13  -5   2   -1.93    2.34 
  13  -5   2    4.81    3.61 
  12   4  -2    9.36    4.76 
 -12  -4   2   -1.63    5.18 
  11   4  -2    6.27    3.83 
 -11  -4   2    2.22    4.99 
  10   4  -2    6.96    3.81 
  10   4  -2    1.07    1.70 
 -10  -4   2   10.89    5.34 
   9   4  -2    2.48    2.69 
   9   4  -2    0.51    1.39 
  -9  -4   2   -1.28    3.77 
   8   4  -2   16.48    4.44 
   8   4  -2   11.27    2.40 
  -8  -4   2    6.96    4.87 
  -8  -4   2   13.36    2.41 
   7   4  -2   16.75    2.47 
   7   4  -2   17.52    4.29 
  -7  -4   2   16.87    5.11 
  -7  -4   2   18.59    2.48 
   6   4  -2   30.13    2.96 
   6   4  -2   32.27    4.56 
  -6  -4   2   29.62    2.31 
  -6  -4   2   30.44    5.45 
   5   4  -2   65.58    3.92 
   5   4  -2   59.61    5.00 
  -5  -4   2   51.88    5.55 
  -5  -4   2   64.09    2.42 
   4   4  -2   -2.37    0.94 
   4   4  -2   -1.93    1.46 
  -4  -4   2    0.71    2.50 
   3   4  -2   19.54    2.34 
   3   4  -2   19.06    2.99 
  -3  -4   2   24.61    3.82 
   2   4  -2   16.92    2.75 
   2   4  -2   22.78    2.29 
  -2  -4   2   23.20    3.55 
   1   4  -2  204.95    6.81 
   1   4  -2  212.49    5.00 
   1   4  -2  222.07    7.70 
  -1  -4   2  204.90    7.90 
   0   4  -2   69.27    2.83 
   0   4  -2   75.45    3.68 
   0  -4   2   65.59    4.24 
  -1   4  -2   -0.99    1.01 
  -1   4  -2    2.79    1.41 
   1  -4   2    1.67    1.88 
   1  -4   2    1.29    1.74 
  -2   4  -2   27.82    2.23 
  -2   4  -2   25.28    2.61 
   2  -4   2   26.58    2.83 
   2  -4   2   26.83    2.91 
  -3   4  -2   -0.03    0.90 
  -3   4  -2    0.31    1.63 
   3  -4   2    0.85    1.62 
   3  -4   2   -0.53    1.38 
  -4   4  -2   42.96    2.41 
  -4   4  -2   36.87    3.43 
   4  -4   2   46.13    3.53 
   4  -4   2   39.28    3.24 
  -5   4  -2   37.51    2.16 
  -5   4  -2   34.09    3.61 
   5  -4   2   30.89    3.29 
   5  -4   2   36.20    3.49 
  -6   4  -2  146.92    4.33 
  -6   4  -2  140.29    7.03 
   6  -4   2  144.61    6.84 
   6  -4   2  151.94    7.17 
  -7   4  -2   27.90    4.40 
  -7   4  -2   25.21    1.48 
   7  -4   2   28.41    3.80 
   7  -4   2   25.73    3.74 
  -8   4  -2    6.68    3.34 
   8  -4   2    6.75    2.98 
   8  -4   2    8.66    3.23 
  -9   4  -2   25.79    5.04 
   9  -4   2   29.65    5.06 
   9  -4   2   23.59    4.67 
 -10   4  -2   28.04    5.07 
  10  -4   2   27.09    4.97 
  10  -4   2   32.19    4.69 
 -11   4  -2   -4.51    2.56 
  11  -4   2   -0.76    2.53 
  11  -4   2    0.61    2.87 
 -12   4  -2   19.62    5.04 
  12  -4   2   15.10    4.41 
  12  -4   2   14.12    4.30 
 -13   4  -2   16.38    5.18 
  13  -4   2   17.18    5.21 
  13  -4   2   20.01    5.17 
  12   3  -2    4.24    4.22 
 -12  -3   2    4.40    5.15 
  11   3  -2   20.58    5.56 
 -11  -3   2   10.31    4.90 
  10   3  -2   10.32    2.21 
  10   3  -2   20.62    5.04 
 -10  -3   2   10.75    5.02 
 -10  -3   2   15.58    3.14 
   9   3  -2   23.52    2.68 
   9   3  -2   26.32    5.17 
  -9  -3   2   20.98    5.52 
  -9  -3   2   20.05    3.23 
   8   3  -2   14.73    4.05 
   8   3  -2    5.67    1.94 
  -8  -3   2   12.62    4.95 
  -8  -3   2   11.53    2.64 
   7   3  -2   20.19    2.47 
   7   3  -2   18.55    3.99 
  -7  -3   2   21.84    4.85 
  -7  -3   2   22.59    2.89 
   6   3  -2   15.09    2.32 
   6   3  -2    8.91    3.17 
  -6  -3   2   14.63    2.18 
  -6  -3   2    7.51    3.95 
   5   3  -2   55.92    4.75 
   5   3  -2   56.90    3.49 
  -5  -3   2   58.54    2.72 
  -5  -3   2   52.52    5.44 
   4   3  -2   -0.03    1.14 
   4   3  -2    2.38    2.03 
  -4  -3   2   -3.40    1.99 
  -4  -3   2    1.88    0.87 
   3   3  -2  198.63    7.82 
   3   3  -2  204.73    6.58 
  -3  -3   2  198.39    8.11 
   2   3  -2   81.28    3.75 
   2   3  -2   83.99    4.52 
  -2  -3   2   82.83    4.85 
   1   3  -2    9.44    1.70 
   1   3  -2   10.24    2.04 
  -1  -3   2    8.68    2.53 
   0   3  -2  251.43    7.33 
   0   3  -2  256.64    6.36 
   0  -3   2  250.93    8.03 
  -1   3  -2   47.97    2.72 
  -1   3  -2   41.23    2.62 
   1  -3   2   48.34    3.53 
   1  -3   2   45.46    3.12 
  -2   3  -2   11.02    2.06 
  -2   3  -2   12.21    1.78 
   2  -3   2    8.29    2.17 
   2  -3   2   11.75    2.07 
  -3   3  -2   20.07    2.61 
  -3   3  -2   20.37    1.85 
   3  -3   2   22.32    2.68 
   3  -3   2   23.87    2.34 
  -4   3  -2   32.43    3.19 
  -4   3  -2   34.26    2.04 
   4  -3   2   34.47    2.93 
   4  -3   2   32.92    3.04 
  -5   3  -2   10.20    1.35 
  -5   3  -2    6.34    2.20 
   5  -3   2    8.95    2.28 
   5  -3   2    7.05    2.30 
  -6   3  -2   10.91    1.16 
  -6   3  -2    9.86    2.81 
   6  -3   2   12.48    2.87 
   6  -3   2   12.07    2.71 
  -7   3  -2    8.22    2.86 
   7  -3   2   17.67    3.45 
   7  -3   2    8.50    2.65 
  -8   3  -2   53.89    5.37 
   8  -3   2   49.38    4.91 
   8  -3   2   55.95    5.07 
  -9   3  -2   22.32    4.70 
   9  -3   2   13.63    3.73 
   9  -3   2   19.04    4.08 
 -10   3  -2   -0.02    3.16 
  10  -3   2    2.78    2.97 
  10  -3   2    6.50    3.34 
 -11   3  -2    3.18    3.51 
  11  -3   2   -0.53    2.51 
  11  -3   2    3.08    2.96 
 -12   3  -2    4.15    3.61 
  12  -3   2   12.87    4.38 
  12  -3   2   10.29    4.07 
 -13   3  -2   13.95    4.70 
  13  -3   2   10.16    4.48 
  13  -3   2   12.78    4.81 
 -14   3  -2   -0.52    3.20 
  14  -3   2    2.77    3.35 
  14  -3   2    1.24    3.09 
  13   2  -2    3.52    4.18 
 -13  -2   2    3.09    4.69 
  12   2  -2   24.07    5.94 
  11   2  -2   -1.52    2.77 
 -11  -2   2   -0.11    2.47 
  10   2  -2    5.05    3.19 
 -10  -2   2   -1.84    2.09 
   9   2  -2    4.66    3.04 
   9   2  -2    4.86    1.59 
  -9  -2   2    4.43    2.35 
   8   2  -2   21.02    2.41 
   8   2  -2   16.59    4.35 
  -8  -2   2   25.27    3.61 
   7   2  -2   89.08    6.68 
   7   2  -2   97.96    4.28 
  -7  -2   2   85.80    4.61 
   6   2  -2    6.16    2.69 
   6   2  -2    9.83    1.87 
  -6  -2   2   10.43    2.09 
   5   2  -2   34.57    3.97 
   5   2  -2   30.39    2.44 
  -5  -2   2   32.36    2.39 
  -5  -2   2   29.75    4.31 
   4   2  -2   38.39    2.60 
   4   2  -2   37.31    3.66 
  -4  -2   2   36.17    4.07 
  -4  -2   2   39.14    2.15 
   3   2  -2   26.48    2.94 
   3   2  -2   27.82    2.19 
  -3  -2   2   27.47    1.50 
  -3  -2   2   29.65    3.60 
   2   2  -2    1.21    1.58 
   2   2  -2   -0.53    1.07 
  -2  -2   2    0.08    0.43 
  -2  -2   2    0.87    2.02 
   1   2  -2   87.34    4.05 
   1   2  -2   90.28    3.67 
  -1  -2   2   90.92    4.68 
   0   2  -2   19.73    2.00 
   0   2  -2   19.22    2.03 
   0  -2   2   23.34    2.77 
  -1   2  -2  143.31    4.61 
   1  -2   2  150.68    4.72 
   1  -2   2  141.96    5.31 
  -2   2  -2   20.10    1.91 
   2  -2   2   23.65    2.08 
   2  -2   2   21.36    2.71 
  -3   2  -2    9.34    1.98 
  -3   2  -2   10.46    1.44 
   3  -2   2   12.70    1.98 
   3  -2   2   10.58    2.37 
  -4   2  -2    3.10    1.75 
  -4   2  -2    1.59    0.97 
   4  -2   2    2.83    1.71 
   4  -2   2    3.93    1.66 
  -5   2  -2    3.71    0.91 
  -5   2  -2    3.93    1.92 
   5  -2   2    2.24    1.69 
   5  -2   2    5.98    2.10 
  -6   2  -2    0.56    0.73 
  -6   2  -2    0.04    1.82 
   6  -2   2   -0.95    1.66 
   6  -2   2   -1.99    1.32 
  -7   2  -2   -2.79    2.08 
   7  -2   2   -1.29    1.70 
   7  -2   2    0.54    1.60 
  -8   2  -2    9.90    3.47 
   8  -2   2   12.75    3.50 
   8  -2   2   11.43    3.22 
  -9   2  -2   22.60    4.38 
   9  -2   2   12.30    3.60 
   9  -2   2   21.07    4.36 
 -10   2  -2    2.76    3.20 
  10  -2   2    4.57    3.24 
  10  -2   2   11.53    3.73 
 -11   2  -2   -0.42    2.68 
  11  -2   2    1.86    2.67 
  11  -2   2    0.78    2.41 
 -12   2  -2    5.02    3.52 
  12  -2   2   -0.23    2.76 
  12  -2   2    2.02    2.89 
 -13   2  -2   13.02    4.61 
  13  -2   2   14.80    4.71 
  13  -2   2   13.23    4.41 
 -14   2  -2   19.12    5.25 
  14  -2   2   14.94    4.91 
  14  -2   2   18.44    5.34 
  13   1  -2   15.20    5.47 
  12   1  -2   -0.71    3.35 
 -12  -1   2    0.80    2.80 
  11   1  -2   -1.88    2.72 
 -11  -1   2   -2.32    2.31 
  10   1  -2    0.90    2.93 
 -10  -1   2    4.54    2.54 
   9   1  -2    1.52    1.28 
   9   1  -2   -2.39    2.30 
  -9  -1   2    4.28    2.60 
   8   1  -2    6.06    1.52 
   8   1  -2   12.49    3.70 
  -8  -1   2    7.24    2.77 
   7   1  -2   15.25    1.89 
   7   1  -2   16.94    3.69 
  -7  -1   2   22.24    3.16 
   6   1  -2    0.38    2.01 
   6   1  -2    0.49    1.01 
  -6  -1   2    0.57    1.62 
   5   1  -2   49.30    4.43 
   5   1  -2   63.62    2.96 
  -5  -1   2   58.22    3.30 
   4   1  -2   18.26    2.94 
   4   1  -2   19.62    1.78 
  -4  -1   2   16.52    1.88 
   3   1  -2   62.45    3.98 
   3   1  -2   65.99    2.94 
  -3  -1   2   58.52    4.09 
  -3  -1   2   66.12    2.63 
   2   1  -2   62.26    3.62 
   2   1  -2   64.81    2.90 
  -2  -1   2   63.53    4.20 
  -2  -1   2   67.12    2.26 
   1   1  -2   60.08    3.23 
   1   1  -2   66.59    2.87 
  -1  -1   2   72.38    3.87 
  -1  -1   2   66.00    1.97 
   0   1  -2  882.86   18.41 
   0   1  -2  835.61   18.46 
   0  -1   2  853.09   17.83 
   0  -1   2  832.51   19.15 
  -1   1  -2   44.72    2.08 
   1  -1   2   50.60    2.74 
   1  -1   2   45.54    1.81 
   1  -1   2   44.21    1.98 
  -2   1  -2    3.92    1.18 
   2  -1   2    6.32    1.21 
   2  -1   2    6.19    1.70 
  -3   1  -2   32.33    1.87 
   3  -1   2   28.06    2.25 
   3  -1   2   31.04    2.69 
  -4   1  -2    0.98    0.90 
   4  -1   2    3.15    1.79 
   4  -1   2   -0.66    1.37 
  -5   1  -2   10.27    1.21 
  -5   1  -2   12.86    2.47 
   5  -1   2   13.68    2.44 
   5  -1   2    8.02    2.28 
  -6   1  -2    1.64    0.90 
  -6   1  -2    3.40    2.21 
   6  -1   2    4.17    1.98 
   6  -1   2    3.67    1.92 
  -7   1  -2   82.98    5.54 
  -7   1  -2   86.74    2.74 
   7  -1   2   83.13    5.47 
   7  -1   2   74.51    5.18 
  -8   1  -2    1.57    2.63 
  -8   1  -2    0.55    0.83 
   8  -1   2    0.44    2.06 
   8  -1   2    3.10    2.50 
  -9   1  -2    5.81    3.32 
   9  -1   2    0.80    2.50 
   9  -1   2    3.45    2.82 
 -10   1  -2   14.46    4.02 
  10  -1   2   18.47    4.23 
  10  -1   2   18.00    4.32 
 -11   1  -2    6.39    3.55 
  11  -1   2   -1.67    2.40 
  11  -1   2   -1.82    2.02 
 -12   1  -2    5.14    3.59 
  12  -1   2    2.65    3.21 
  12  -1   2    6.61    3.44 
 -13   1  -2   28.46    5.64 
  13  -1   2   28.09    5.92 
  13  -1   2   13.88    4.80 
 -14   1  -2    1.06    3.61 
  14  -1   2    7.46    4.05 
  14  -1   2    2.12    3.38 
  13   0  -2   14.87    5.10 
 -13   0   2   12.35    3.73 
  12   0  -2    8.47    3.89 
 -12   0   2    7.48    3.42 
  11   0  -2   29.12    6.08 
 -11   0   2   40.45    4.94 
  10   0  -2   19.10    4.73 
 -10   0   2   14.48    3.52 
   9   0  -2    2.05    2.85 
  -9   0   2    2.09    2.58 
   8   0  -2   74.52    3.14 
   8   0  -2   79.37    6.75 
  -8   0   2   68.24    5.12 
   7   0  -2   27.44    1.90 
   7   0  -2   27.62    4.09 
  -7   0   2   30.45    3.54 
   6   0  -2   24.13    3.62 
   6   0  -2   26.94    1.88 
  -6   0   2   29.29    3.10 
   5   0  -2    0.23    0.81 
   5   0  -2   -0.47    1.60 
  -5   0   2    1.60    1.39 
   4   0  -2    7.18    1.28 
   4   0  -2    7.18    2.10 
  -4   0   2    5.45    1.51 
   3   0  -2   13.38    2.54 
   3   0  -2   13.69    1.55 
  -3   0   2   13.58    1.81 
   2   0  -2   30.71    1.99 
   2   0  -2   33.12    3.02 
  -2   0   2   32.77    2.00 
  -2   0   2   35.22    3.37 
   1   0  -2  234.19    6.66 
   1   0  -2  236.66    6.02 
  -1   0   2  242.11    6.92 
   0   0  -2    6.79    0.94 
   0   0  -2    7.47    1.05 
   0   0   2    6.60    0.85 
   0   0   2   10.60    1.55 
  -1   0  -2    1.55    0.77 
   1   0   2    2.62    0.86 
   1   0   2    2.59    1.08 
  -2   0  -2  538.76   11.91 
   2   0   2  533.13   12.77 
   2   0   2  556.06   12.55 
   2   0   2  529.74   11.71 
   3   0   2    7.49    1.91 
   3   0   2    4.30    1.47 
   3   0   2    6.34    1.58 
   4   0   2  101.44    4.30 
   4   0   2   94.81    4.48 
   5   0   2   31.43    2.95 
   5   0   2   36.22    3.19 
  -6   0  -2   32.98    3.32 
   6   0   2   29.42    3.28 
   6   0   2   36.15    3.48 
  -7   0  -2  303.30   10.47 
   7   0   2  303.29   10.84 
   7   0   2  309.99   11.13 
  -8   0  -2   -2.24    2.20 
   8   0   2    0.18    1.87 
   8   0   2    2.57    2.35 
  -9   0  -2   93.66    6.67 
   9   0   2   97.39    6.90 
   9   0   2  107.86    6.97 
 -10   0  -2   13.04    4.12 
  10   0   2   10.99    3.72 
  10   0   2   12.15    3.44 
 -11   0  -2    3.74    3.08 
  11   0   2    3.40    2.80 
  11   0   2    2.22    2.75 
 -12   0  -2    4.02    3.36 
  12   0   2    1.95    3.25 
  12   0   2    7.97    3.60 
 -13   0  -2   -0.70    3.21 
  13   0   2   -0.14    2.88 
  13   0   2   11.25    4.31 
 -14   0  -2   17.64    5.11 
  14   0   2   19.63    5.75 
  13  -1  -2   -1.05    3.17 
 -13   1   2    1.32    3.15 
  12  -1  -2    3.54    3.50 
 -12   1   2    3.55    2.83 
  11  -1  -2   -1.84    2.84 
 -11   1   2    6.16    3.29 
  10  -1  -2    1.00    2.64 
 -10   1   2    2.49    2.53 
   9  -1  -2   29.51    5.53 
  -9   1   2   30.55    4.63 
   8  -1  -2    0.38    0.78 
   8  -1  -2    3.36    2.69 
  -8   1   2   -1.39    2.28 
   7  -1  -2   15.56    3.57 
   7  -1  -2   11.60    1.18 
  -7   1   2   12.51    2.97 
   6  -1  -2   95.30    3.08 
   6  -1  -2   89.52    6.08 
  -6   1   2  100.85    5.16 
   5  -1  -2   41.88    4.00 
   5  -1  -2   47.01    2.04 
  -5   1   2   47.52    3.41 
   4  -1  -2   57.91    4.19 
   4  -1  -2   61.30    2.40 
  -4   1   2   61.21    3.47 
   3  -1  -2  116.75    3.52 
   3  -1  -2  116.30    5.31 
  -3   1   2  111.61    4.30 
   2  -1  -2   19.10    1.59 
   2  -1  -2   18.42    2.64 
  -2   1   2   18.08    1.86 
   1  -1  -2  232.39    5.90 
   1  -1  -2  236.26    6.73 
  -1   1   2  239.47    6.65 
  -1   1   2  243.33    6.12 
   0  -1  -2  185.22    4.93 
   0   1   2  199.00    5.00 
   0   1   2  188.44    4.93 
  -1  -1  -2   55.23    2.03 
   1   1   2   53.87    2.19 
   1   1   2   52.91    2.15 
   2   1   2  145.86    4.47 
   2   1   2  144.75    4.23 
   2   1   2  140.68    4.16 
   2   1   2  146.17    4.54 
   3   1   2   30.93    2.41 
   3   1   2   28.66    2.31 
   3   1   2   25.76    1.80 
   3   1   2   25.15    2.40 
   4   1   2   -1.35    1.11 
   4   1   2    1.77    1.04 
   4   1   2    1.82    1.54 
   4   1   2    0.13    1.34 
   5   1   2    6.01    2.02 
   5   1   2    6.79    1.36 
   5   1   2    5.05    1.99 
   6   1   2   20.50    2.91 
   6   1   2   18.54    1.80 
   6   1   2   14.56    2.85 
  -7  -1  -2   70.25    4.69 
   7   1   2   74.78    5.17 
   7   1   2   79.75    3.24 
   7   1   2   71.23    5.08 
  -8  -1  -2   46.44    4.52 
   8   1   2   49.33    4.82 
   8   1   2   51.92    4.68 
   8   1   2   48.60    2.63 
  -9  -1  -2   23.90    4.40 
   9   1   2   29.97    4.40 
   9   1   2   38.06    4.62 
 -10  -1  -2   22.52    4.74 
  10   1   2   41.72    5.36 
  10   1   2   31.27    4.77 
 -11  -1  -2    1.21    2.55 
  11   1   2   -2.05    2.14 
  11   1   2   -3.79    2.42 
 -12  -1  -2   19.77    4.45 
  12   1   2   23.77    5.32 
  12   1   2   31.65    5.98 
 -13  -1  -2    0.83    3.37 
  13   1   2    1.54    3.10 
 -14  -1  -2    3.61    3.69 
  14   1   2    2.95    3.63 
  13  -2  -2   -3.08    3.00 
 -13   2   2    6.43    3.39 
  12  -2  -2    4.44    3.71 
 -12   2   2    2.42    3.25 
  11  -2  -2    2.47    3.38 
 -11   2   2   -3.15    2.46 
  10  -2  -2   -1.03    2.66 
 -10   2   2    3.39    2.84 
   9  -2  -2   -3.60    2.35 
  -9   2   2   -2.57    2.44 
   8  -2  -2   13.97    4.07 
  -8   2   2    6.55    3.08 
   7  -2  -2    3.09    2.34 
  -7   2   2   -1.75    2.05 
   6  -2  -2   31.72    3.94 
   6  -2  -2   26.69    3.50 
  -6   2   2   21.94    3.12 
   5  -2  -2   69.77    2.27 
   5  -2  -2   63.50    4.39 
   5  -2  -2   64.82    4.86 
  -5   2   2   54.94    3.84 
   4  -2  -2    1.54    1.73 
   4  -2  -2    2.20    0.84 
   4  -2  -2   -0.54    1.44 
  -4   2   2    0.97    1.44 
   3  -2  -2  103.89    3.18 
   3  -2  -2  100.61    5.11 
  -3   2   2  105.45    4.34 
   2  -2  -2   25.60    2.82 
  -2   2   2   25.74    2.28 
   1  -2  -2  102.29    4.24 
  -1   2   2  104.65    3.77 
   0  -2  -2  960.06   21.14 
   0   2   2 1000.00   20.07 
   0   2   2  936.81   20.79 
   0   2   2  983.95   20.93 
  -1  -2  -2   15.97    1.93 
   1   2   2   15.82    1.49 
   1   2   2   14.40    1.13 
   1   2   2   12.78    1.45 
   2   2   2  155.65    4.80 
   2   2   2  163.42    4.92 
   2   2   2  160.94    5.13 
   2   2   2  164.28    4.86 
   3   2   2   64.43    3.39 
   3   2   2   73.02    3.03 
   3   2   2   64.67    3.44 
   3   2   2   68.47    3.15 
   4   2   2   51.66    3.44 
   4   2   2   50.28    3.31 
   4   2   2   50.47    2.65 
   4   2   2   53.45    3.01 
   5   2   2  241.31    7.55 
   5   2   2  241.50    6.91 
   5   2   2  239.21    8.35 
   5   2   2  240.42    8.50 
   6   2   2    3.12    2.08 
   6   2   2    1.93    1.14 
   6   2   2    9.81    2.43 
   7   2   2   53.70    2.99 
   7   2   2   52.05    4.40 
   7   2   2   48.90    4.43 
  -8  -2  -2    4.66    2.66 
   8   2   2    6.74    2.76 
   8   2   2    6.78    1.62 
   8   2   2    5.84    2.58 
  -9  -2  -2   87.03    6.23 
   9   2   2   92.50    4.18 
   9   2   2  100.74    6.94 
   9   2   2   81.99    6.64 
 -10  -2  -2    7.39    3.42 
  10   2   2    0.47    2.74 
  10   2   2    3.94    3.18 
  10   2   2    3.52    1.46 
 -11  -2  -2   14.22    3.97 
  11   2   2   11.00    4.14 
  11   2   2    8.65    3.58 
 -12  -2  -2    7.90    3.63 
  12   2   2   12.15    4.26 
 -13  -2  -2   11.37    3.99 
  13   2   2    9.82    4.30 
 -14  -2  -2    9.20    4.35 
  14   2   2    7.58    4.31 
  13  -3  -2    1.74    3.76 
 -13   3   2    2.81    3.52 
  12  -3  -2   -4.48    2.33 
 -12   3   2    2.16    3.25 
  11  -3  -2   46.66    6.29 
 -11   3   2   26.99    5.21 
  10  -3  -2   23.52    5.15 
 -10   3   2   18.72    4.31 
   9  -3  -2   -1.20    2.74 
  -9   3   2   -6.47    2.36 
   8  -3  -2   22.85    4.36 
   8  -3  -2   24.05    4.80 
  -8   3   2   15.81    3.80 
   7  -3  -2    9.61    2.77 
   7  -3  -2    0.24    2.33 
  -7   3   2   10.68    3.13 
   6  -3  -2    7.40    2.53 
   6  -3  -2    3.11    2.47 
  -6   3   2   10.75    2.67 
   5  -3  -2   32.89    3.29 
   5  -3  -2   41.81    4.00 
   5  -3  -2   34.39    1.57 
  -5   3   2   34.16    3.40 
   4  -3  -2    0.06    1.37 
   4  -3  -2   -0.10    0.78 
   4  -3  -2    2.33    1.93 
  -4   3   2    1.51    1.58 
   3  -3  -2  205.53    6.61 
   3  -3  -2  198.41    7.50 
  -3   3   2  195.43    6.66 
   2  -3  -2   76.88    3.27 
   2  -3  -2   76.33    4.24 
  -2   3   2   78.94    3.65 
  -2   3   2   70.05    2.76 
   1  -3  -2   29.50    2.95 
  -1   3   2   32.11    2.03 
  -1   3   2   32.43    2.37 
   0  -3  -2   53.86    3.44 
   0   3   2   52.48    2.65 
   0   3   2   52.76    2.73 
  -1  -3  -2  139.85    5.44 
   1   3   2  151.70    4.81 
   1   3   2  151.11    4.65 
   1   3   2  148.67    3.68 
   2   3   2   64.32    2.69 
   2   3   2   63.28    3.03 
   2   3   2   64.40    2.88 
   3   3   2   67.58    3.25 
   3   3   2   60.65    3.11 
   3   3   2   64.15    3.04 
   3   3   2   64.49    3.76 
   4   3   2   27.18    2.68 
   4   3   2   29.41    2.31 
   4   3   2   26.51    2.87 
   4   3   2   21.78    2.13 
   5   3   2  110.97    4.61 
   5   3   2  111.22    5.44 
   5   3   2  112.22    5.66 
   5   3   2  112.29    4.47 
   6   3   2    3.06    1.92 
   6   3   2    6.96    2.40 
   6   3   2    5.62    1.52 
   7   3   2    8.91    1.82 
   7   3   2    8.94    2.89 
   7   3   2    6.83    2.77 
   8   3   2   35.11    2.78 
   8   3   2   29.63    4.24 
   8   3   2   27.78    4.07 
  -9  -3  -2    8.22    3.08 
   9   3   2    7.91    3.33 
   9   3   2    5.69    3.22 
   9   3   2    8.51    1.93 
 -10  -3  -2   12.62    3.66 
  10   3   2   17.98    4.40 
  10   3   2   19.42    2.76 
 -11  -3  -2    5.86    3.42 
  11   3   2    7.72    2.08 
  11   3   2    6.61    3.50 
 -12  -3  -2    3.24    3.18 
  12   3   2   -2.39    2.52 
 -13  -3  -2    1.70    3.11 
  13   3   2    0.10    3.17 
  14   3   2    7.18    4.63 
  13  -4  -2    3.94    3.42 
 -13   4   2   -2.35    2.75 
  12  -4  -2    7.92    4.21 
 -12   4   2    8.60    3.73 
  11  -4  -2   14.96    4.87 
 -11   4   2    7.99    3.71 
  10  -4  -2   42.71    6.13 
 -10   4   2   39.85    5.41 
   9  -4  -2    4.94    3.31 
   9  -4  -2    1.65    2.82 
  -9   4   2    6.71    3.37 
   8  -4  -2   15.73    4.05 
   8  -4  -2   27.96    4.40 
  -8   4   2   20.07    4.11 
   7  -4  -2    8.97    3.47 
   7  -4  -2    5.99    2.73 
  -7   4   2   10.32    3.33 
   6  -4  -2   24.49    3.88 
   6  -4  -2   21.60    3.43 
  -6   4   2   17.76    3.50 
   5  -4  -2    0.72    1.53 
   5  -4  -2    3.55    0.94 
   5  -4  -2   -0.07    2.01 
  -5   4   2    1.71    1.98 
   4  -4  -2   31.12    2.82 
   4  -4  -2   31.24    3.72 
  -4   4   2   30.27    3.11 
   3  -4  -2    2.83    1.28 
   3  -4  -2    1.50    1.64 
  -3   4   2    1.72    1.61 
  -3   4   2    2.65    1.04 
   2  -4  -2    9.68    2.30 
   2  -4  -2   10.52    1.53 
  -2   4   2   13.48    2.05 
  -2   4   2   10.66    1.48 
   1  -4  -2    0.29    0.77 
   1  -4  -2    0.64    1.76 
  -1   4   2   -0.44    0.85 
  -1   4   2   -1.63    1.01 
   0  -4  -2  444.99   12.53 
   0   4   2  479.16   11.53 
   0   4   2  474.24   11.58 
  -1  -4  -2   26.67    1.64 
  -1  -4  -2   23.91    3.00 
   1   4   2   26.38    2.11 
   1   4   2   25.88    2.15 
   2   4   2   16.91    1.73 
   2   4   2   12.41    1.82 
   3   4   2  126.30    4.48 
   3   4   2  132.11    4.94 
   3   4   2  126.00    5.66 
   4   4   2  119.46    5.85 
   4   4   2  113.35    4.45 
   4   4   2  118.83    4.75 
   5   4   2   10.04    1.97 
   5   4   2   11.54    2.73 
   5   4   2   10.14    1.96 
   5   4   2   11.96    2.61 
   6   4   2    0.89    1.35 
   6   4   2    1.94    1.31 
   6   4   2    1.63    1.95 
   6   4   2   -0.44    1.68 
   7   4   2   58.35    3.70 
   7   4   2   62.51    5.21 
   8   4   2    1.68    2.48 
   8   4   2    3.18    1.56 
  -9  -4  -2   20.04    3.83 
   9   4   2   18.03    2.72 
   9   4   2   17.86    4.01 
 -10  -4  -2   -1.88    2.30 
  10   4   2   -0.14    1.31 
  10   4   2    1.02    2.66 
 -11  -4  -2   14.93    3.71 
  11   4   2   20.52    4.90 
  11   4   2   16.12    2.82 
 -12  -4  -2   48.70    5.43 
  12   4   2   36.71    5.86 
 -13  -4  -2    5.91    3.27 
  13   4   2    7.05    3.75 
  12  -5  -2    2.99    3.62 
 -12   5   2    6.23    3.37 
  11  -5  -2   -1.15    2.76 
 -11   5   2   -4.59    2.65 
  10  -5  -2   -3.32    2.19 
  10  -5  -2    0.14    2.79 
 -10   5   2   -1.72    2.56 
   9  -5  -2   18.41    4.51 
   9  -5  -2   19.27    4.40 
  -9   5   2   16.75    4.21 
   8  -5  -2   30.03    4.95 
   8  -5  -2   40.02    4.75 
  -8   5   2   33.37    5.24 
   7  -5  -2    4.71    2.54 
   7  -5  -2    7.45    3.42 
  -7   5   2   12.91    3.82 
   6  -5  -2   14.58    3.08 
   6  -5  -2    9.96    3.08 
   6  -5  -2   13.80    1.43 
  -6   5   2   11.17    3.06 
   5  -5  -2   53.04    4.79 
   5  -5  -2   54.03    3.90 
  -5   5   2   49.67    4.24 
   4  -5  -2    1.44    1.84 
   4  -5  -2   -0.76    1.23 
  -4   5   2    0.49    0.99 
  -4   5   2    1.18    1.71 
   3  -5  -2   12.50    1.98 
   3  -5  -2   17.38    3.01 
  -3   5   2   12.34    2.22 
  -3   5   2   12.41    1.53 
   2  -5  -2  106.54    5.48 
   2  -5  -2  106.51    3.84 
  -2   5   2  104.55    4.79 
  -2   5   2  103.60    4.01 
   1  -5  -2    2.38    1.99 
   1  -5  -2    3.43    0.97 
  -1   5   2    3.68    1.34 
  -1   5   2    5.05    1.53 
   0  -5  -2  690.79   14.78 
   0  -5  -2  692.32   18.15 
   0   5   2  729.67   16.70 
   0   5   2  712.97   16.82 
  -1  -5  -2   97.79    3.31 
  -1  -5  -2   97.43    5.40 
   1   5   2   98.71    3.98 
   1   5   2   97.11    4.25 
  -2  -5  -2   46.32    2.84 
   2   5   2   40.76    2.48 
   2   5   2   49.38    3.06 
   3   5   2   22.66    2.42 
   3   5   2   23.05    2.08 
   4   5   2    5.08    2.09 
   4   5   2    3.09    1.35 
   4   5   2    1.17    1.30 
   5   5   2  129.29    6.79 
   5   5   2  136.24    5.06 
   5   5   2  119.08    5.32 
   6   5   2   26.05    2.66 
   6   5   2   23.48    2.68 
   6   5   2   23.00    3.59 
   7   5   2   -0.30    1.31 
   7   5   2    2.25    2.27 
   8   5   2    5.35    2.82 
   8   5   2    0.17    1.43 
   9   5   2   42.28    3.59 
   9   5   2   46.92    5.47 
 -10  -5  -2    5.27    2.63 
  10   5   2    1.26    1.67 
  10   5   2    1.55    2.74 
 -11  -5  -2    5.45    3.04 
  11   5   2   -0.12    2.76 
  11   5   2    1.82    1.71 
 -12  -5  -2    0.63    2.90 
  12   5   2    0.12    3.11 
  13   5   2    5.65    3.80 
  12  -6  -2    5.57    4.12 
 -12   6   2    0.59    2.85 
  11  -6  -2   42.69    6.38 
 -11   6   2   25.85    5.14 
  10  -6  -2   11.66    3.92 
  10  -6  -2    5.89    3.47 
 -10   6   2   13.93    4.25 
   9  -6  -2   25.67    5.25 
   9  -6  -2   21.19    4.45 
  -9   6   2   25.60    4.87 
   8  -6  -2    4.26    2.78 
   8  -6  -2    2.11    2.85 
  -8   6   2    3.28    3.19 
   7  -6  -2    5.99    2.73 
   7  -6  -2    0.61    2.90 
  -7   6   2    2.65    3.06 
   6  -6  -2   17.48    4.01 
   6  -6  -2   21.56    3.19 
  -6   6   2   17.21    3.45 
   5  -6  -2    1.96    1.87 
   5  -6  -2   -0.89    2.26 
  -5   6   2    0.00    2.11 
  -5   6   2    2.74    1.15 
   4  -6  -2   25.45    4.13 
   4  -6  -2   27.17    2.80 
  -4   6   2   33.01    3.51 
  -4   6   2   27.67    2.21 
   3  -6  -2    1.28    1.39 
   3  -6  -2    2.45    2.13 
  -3   6   2    0.53    1.39 
  -3   6   2    0.56    1.07 
   2  -6  -2  124.39    4.35 
   2  -6  -2  113.59    6.16 
  -2   6   2  123.23    5.49 
  -2   6   2  132.53    4.93 
   1  -6  -2   16.61    3.14 
   1  -6  -2   15.68    1.45 
  -1   6   2   14.42    2.17 
  -1   6   2   22.06    2.22 
   0  -6  -2   13.77    1.31 
   0  -6  -2   21.91    3.36 
   0   6   2   15.16    2.06 
   0   6   2   19.04    2.22 
  -1  -6  -2   19.07    1.83 
  -1  -6  -2   17.25    3.28 
   1   6   2   16.33    1.98 
   1   6   2   14.42    2.07 
  -2  -6  -2    2.95    1.68 
   2   6   2   -0.16    0.99 
   2   6   2    0.74    1.25 
  -3  -6  -2  169.40    6.46 
   3   6   2  182.30    5.86 
   3   6   2  174.94    6.62 
  -4  -6  -2  122.21    5.87 
   4   6   2  119.60    4.68 
   4   6   2  123.96    5.50 
   5   6   2   36.23    3.22 
   5   6   2   38.03    4.21 
   5   6   2   32.16    2.65 
   6   6   2   10.45    3.17 
   6   6   2    8.58    2.12 
   6   6   2    1.82    1.59 
   7   6   2    2.08    1.71 
   7   6   2    0.01    1.62 
   7   6   2   -1.84    2.22 
   8   6   2   12.68    3.79 
   8   6   2   20.48    3.01 
   9   6   2   -0.34    2.51 
   9   6   2    0.09    1.44 
 -10  -6  -2   -3.49    1.95 
  10   6   2    0.78    1.82 
  10   6   2   -1.26    2.18 
 -11  -6  -2   12.53    3.60 
  11   6   2    8.24    2.59 
  11   6   2    2.92    2.80 
  12   6   2   -0.80    1.82 
  12   6   2    1.20    3.05 
  13   6   2    2.56    3.73 
  12  -7  -2    1.21    3.22 
 -12   7   2    0.86    3.23 
  11  -7  -2    2.30    3.48 
  11  -7  -2   -1.42    2.94 
 -11   7   2    0.00    2.81 
  10  -7  -2   14.70    4.26 
  10  -7  -2   20.22    5.34 
 -10   7   2   11.73    4.00 
   9  -7  -2    2.34    3.07 
   9  -7  -2    0.86    2.88 
  -9   7   2    3.61    2.88 
   8  -7  -2    0.51    2.89 
   8  -7  -2    0.88    2.56 
  -8   7   2    1.36    2.64 
   7  -7  -2   48.31    5.84 
   7  -7  -2   47.79    4.59 
  -7   7   2   42.85    5.31 
   6  -7  -2   -0.18    1.95 
   6  -7  -2    1.42    2.91 
  -6   7   2   -2.65    2.28 
  -6   7   2   -0.82    1.17 
   5  -7  -2   73.76    5.89 
   5  -7  -2   60.84    4.38 
  -5   7   2   64.04    3.37 
  -5   7   2   65.78    5.38 
   4  -7  -2    1.66    1.53 
   4  -7  -2   -2.10    2.32 
  -4   7   2    3.31    1.41 
  -4   7   2   -2.50    1.54 
   3  -7  -2   -1.53    2.00 
   3  -7  -2   -0.47    1.28 
  -3   7   2    0.00    1.10 
  -3   7   2   -0.76    1.53 
   2  -7  -2    3.53    1.35 
   2  -7  -2    1.31    2.21 
  -2   7   2    5.17    1.60 
  -2   7   2    2.12    1.60 
   1  -7  -2   34.03    2.08 
   1  -7  -2   32.16    4.02 
  -1   7   2   34.57    2.81 
  -1   7   2   41.17    3.16 
   0  -7  -2   35.71    2.12 
   0  -7  -2   35.63    4.22 
   0   7   2   36.35    2.99 
   0   7   2   36.62    2.84 
  -1  -7  -2   95.15    3.81 
  -1  -7  -2   83.50    5.74 
   1   7   2   95.93    4.28 
   1   7   2   93.99    4.72 
  -2  -7  -2    0.56    1.65 
  -2  -7  -2    0.84    2.60 
   2   7   2    0.02    1.14 
   2   7   2    1.88    1.60 
  -3  -7  -2   76.54    4.53 
   3   7   2   79.00    3.75 
   3   7   2   80.03    4.59 
  -4  -7  -2    0.72    2.33 
   4   7   2    0.25    1.46 
   4   7   2   -1.04    1.01 
  -5  -7  -2   47.37    5.13 
   5   7   2   57.54    3.41 
   5   7   2   58.59    4.15 
   5   7   2   53.37    5.35 
  -6  -7  -2   81.93    6.43 
   6   7   2   90.39    6.78 
   6   7   2   85.01    5.06 
   6   7   2   82.85    4.30 
  -7  -7  -2    7.35    4.15 
   7   7   2   11.23    3.61 
   7   7   2   14.74    2.99 
   7   7   2   15.79    2.64 
   8   7   2    2.35    1.95 
   8   7   2    3.05    2.85 
   9   7   2    0.11    2.35 
   9   7   2    2.13    1.91 
  10   7   2   22.09    4.88 
  10   7   2   22.41    3.34 
 -11  -7  -2   -0.90    4.06 
  11   7   2    2.13    3.14 
  11   7   2   -0.36    1.98 
 -12  -7  -2    4.64    4.62 
  12   7   2    0.14    2.58 
  12   7   2   -4.23    1.47 
  11  -8  -2   13.90    4.47 
  11  -8  -2    8.89    3.82 
 -11   8   2    8.69    3.87 
  10  -8  -2    3.48    3.11 
  10  -8  -2    0.66    3.23 
 -10   8   2   -4.80    2.58 
   9  -8  -2    2.45    2.88 
   9  -8  -2   10.88    4.18 
  -9   8   2    4.88    3.44 
   8  -8  -2    4.35    3.21 
   8  -8  -2   -3.70    1.76 
  -8   8   2   -1.98    2.50 
   7  -8  -2   42.26    5.93 
   7  -8  -2   44.71    4.37 
  -7   8   2   38.79    5.33 
   6  -8  -2   62.76    6.61 
   6  -8  -2   60.20    4.80 
  -6   8   2   61.32    3.48 
  -6   8   2   58.63    5.66 
   5  -8  -2   17.72    3.14 
   5  -8  -2   10.61    3.97 
  -5   8   2   14.75    2.23 
  -5   8   2   21.95    4.09 
   4  -8  -2   18.65    2.82 
   4  -8  -2   20.90    4.37 
  -4   8   2   18.32    3.34 
  -4   8   2   27.56    2.68 
   3  -8  -2    8.83    3.28 
   3  -8  -2   10.47    2.05 
  -3   8   2    6.26    2.52 
  -3   8   2    8.83    2.00 
   2  -8  -2   10.89    1.82 
   2  -8  -2    9.19    3.07 
  -2   8   2   16.92    2.95 
  -2   8   2   11.76    2.27 
   1  -8  -2   69.27    5.49 
   1  -8  -2   76.91    3.23 
  -1   8   2   78.88    4.42 
  -1   8   2   73.85    4.32 
   0  -8  -2    1.48    2.43 
   0  -8  -2    2.54    1.25 
   0   8   2    2.10    1.48 
   0   8   2   -1.06    1.25 
  -1  -8  -2   72.89    5.82 
  -1  -8  -2   72.49    3.61 
   1   8   2   68.17    4.33 
   1   8   2   70.66    3.90 
  -2  -8  -2   16.58    2.68 
  -2  -8  -2    9.75    3.75 
   2   8   2   13.29    2.19 
   2   8   2   12.72    2.48 
  -3  -8  -2    2.23    2.41 
   3   8   2    1.33    1.37 
   3   8   2    1.17    1.47 
  -4  -8  -2   33.95    4.13 
   4   8   2   38.92    3.67 
   4   8   2   39.25    2.95 
  -5  -8  -2    3.47    3.03 
   5   8   2   11.91    2.67 
   5   8   2    9.34    1.98 
  -6  -8  -2   -2.24    3.22 
   6   8   2    3.09    1.99 
   6   8   2   -1.10    2.66 
   6   8   2    3.90    1.67 
  -7  -8  -2    3.00    3.94 
   7   8   2    2.27    1.71 
   7   8   2    5.00    2.28 
   7   8   2    4.19    3.18 
  -8  -8  -2    5.10    4.04 
   8   8   2    1.27    1.90 
   8   8   2    4.65    2.99 
  -9  -8  -2   19.58    5.42 
   9   8   2   10.60    3.88 
   9   8   2   13.59    3.32 
 -10  -8  -2    6.77    4.72 
  10   8   2    4.80    2.51 
  10   8   2    3.47    3.11 
 -11  -8  -2   10.51    5.29 
  11   8   2    9.49    2.93 
  11   8   2    8.16    3.75 
 -12  -8  -2    9.00    5.59 
  12   8   2    5.07    2.69 
  12   8   2   -2.30    2.52 
  11  -9  -2   -1.84    2.90 
  11  -9  -2    3.20    3.65 
 -11   9   2   -0.67    3.51 
  10  -9  -2   -0.87    2.92 
  10  -9  -2    2.36    3.12 
 -10   9   2    1.12    3.06 
   9  -9  -2   19.04    5.14 
   9  -9  -2   32.69    4.72 
  -9   9   2   24.71    5.44 
   8  -9  -2    1.56    2.28 
   8  -9  -2   -1.07    2.75 
  -8   9   2    6.36    2.96 
   7  -9  -2   21.28    3.49 
   7  -9  -2   20.65    5.26 
  -7   9   2   12.94    3.83 
   6  -9  -2    1.26    1.96 
   6  -9  -2    0.28    2.94 
  -6   9   2    3.90    2.60 
  -6   9   2   -0.67    1.45 
   5  -9  -2    1.12    3.21 
   5  -9  -2    3.14    2.17 
  -5   9   2    4.62    1.87 
  -5   9   2    2.65    2.68 
   4  -9  -2   13.24    2.63 
   4  -9  -2   13.12    3.98 
  -4   9   2   12.71    2.59 
  -4   9   2   12.60    3.36 
   3  -9  -2   -3.45    2.59 
   3  -9  -2   -0.73    1.41 
  -3   9   2    1.72    1.57 
  -3   9   2   -0.08    2.01 
   2  -9  -2   18.33    2.25 
   2  -9  -2   17.80    4.05 
  -2   9   2   22.10    2.91 
  -2   9   2   23.12    3.63 
   1  -9  -2    0.10    1.27 
   1  -9  -2   -2.39    2.51 
  -1   9   2    0.36    1.77 
  -1   9   2    1.28    1.60 
   0  -9  -2    8.11    1.84 
   0  -9  -2    7.20    3.76 
   0   9   2   10.83    2.45 
   0   9   2    8.12    2.22 
  -1  -9  -2   -3.43    2.76 
  -1  -9  -2   -0.96    1.62 
   1   9   2   -0.39    1.38 
   1   9   2    1.54    1.75 
  -2  -9  -2    2.19    2.13 
  -2  -9  -2    1.27    3.48 
   2   9   2    0.80    1.54 
   2   9   2    2.13    1.58 
  -3  -9  -2  146.07    6.96 
  -3  -9  -2  142.22    9.51 
   3   9   2  147.38    5.79 
   3   9   2  150.14    7.13 
  -4  -9  -2   22.43    4.29 
   4   9   2   21.90    2.60 
   4   9   2   27.35    3.49 
  -5  -9  -2   18.07    4.27 
   5   9   2   15.71    2.43 
   5   9   2   14.73    3.19 
  -6  -9  -2    4.06    3.16 
   6   9   2   14.67    3.23 
   6   9   2    9.69    2.12 
  -7  -9  -2    9.25    4.05 
   7   9   2    4.07    1.93 
   7   9   2    7.92    2.71 
  -8  -9  -2   23.58    5.26 
   8   9   2    8.66    3.86 
   8   9   2   10.54    2.85 
  -9  -9  -2    7.14    4.42 
   9   9   2    4.84    2.24 
   9   9   2    6.27    3.71 
 -10  -9  -2   -2.61    3.46 
  10   9   2    1.96    3.16 
  10   9   2    4.24    2.46 
 -11  -9  -2   -2.30    4.47 
  11   9   2    0.69    1.95 
  11   9   2    4.27    3.34 
  10 -10  -2    6.48    4.52 
  10 -10  -2    0.62    3.14 
 -10  10   2    4.57    3.19 
   9 -10  -2    2.65    3.56 
   9 -10  -2    2.73    2.90 
  -9  10   2   -2.45    2.58 
   8 -10  -2    0.22    2.36 
   8 -10  -2    7.07    3.96 
  -8  10   2    0.50    2.44 
   7 -10  -2    3.28    2.47 
   7 -10  -2    1.59    3.56 
  -7  10   2    6.24    3.11 
   6 -10  -2    6.88    2.59 
   6 -10  -2    4.48    3.14 
  -6  10   2    4.32    2.68 
  -6  10   2    2.85    1.71 
   5 -10  -2   -0.52    3.16 
   5 -10  -2    0.25    1.89 
  -5  10   2    0.81    2.45 
  -5  10   2    1.88    1.69 
   4 -10  -2   16.39    2.96 
   4 -10  -2   14.42    4.69 
  -4  10   2   22.24    2.94 
  -4  10   2   12.46    3.46 
   3 -10  -2    2.19    1.80 
   3 -10  -2   -2.68    2.77 
  -3  10   2    0.42    2.07 
  -3  10   2    3.60    1.93 
   2 -10  -2   -1.73    1.32 
   2 -10  -2   -3.63    2.75 
  -2  10   2    2.61    2.06 
  -2  10   2    1.58    1.86 
   1 -10  -2   10.70    2.04 
   1 -10  -2    8.60    3.84 
  -1  10   2   10.03    2.53 
  -1  10   2    5.96    2.23 
   0 -10  -2   -0.58    3.45 
   0 -10  -2    0.68    1.58 
   0  10   2    0.53    1.83 
   0  10   2    0.92    1.81 
  -1 -10  -2    6.22    4.00 
  -1 -10  -2    1.59    2.10 
   1  10   2    4.74    2.15 
   1  10   2    7.90    2.25 
  -2 -10  -2   19.58    3.44 
  -2 -10  -2   19.34    5.08 
   2  10   2   19.77    2.75 
   2  10   2   19.32    3.54 
  -3 -10  -2    5.17    2.95 
  -3 -10  -2    9.92    4.43 
   3  10   2    7.55    2.66 
   3  10   2    5.94    1.98 
  -4 -10  -2    7.73    3.37 
   4  10   2    2.63    1.68 
   4  10   2   -1.29    1.73 
  -5 -10  -2    0.02    2.98 
   5  10   2    0.24    1.35 
   5  10   2    2.04    2.06 
  -6 -10  -2   -0.34    3.11 
   6  10   2    1.88    1.93 
   6  10   2    0.15    1.44 
  -7 -10  -2   10.82    3.86 
   7  10   2    9.55    2.87 
  -8 -10  -2   -0.58    3.37 
   8  10   2    2.36    2.16 
  -9 -10  -2    3.57    4.10 
   9  10   2   -1.99    1.69 
 -10 -10  -2   13.38    5.31 
  10  10   2    9.49    3.09 
  10  10   2   15.64    5.08 
  10 -11  -2    8.38    4.75 
  10 -11  -2   11.89    4.02 
 -10  11   2   13.48    4.57 
   9 -11  -2    5.71    4.02 
   9 -11  -2    1.83    2.85 
  -9  11   2   -3.73    2.22 
   8 -11  -2   -1.90    3.39 
   8 -11  -2    0.52    2.56 
  -8  11   2    1.52    2.43 
   7 -11  -2    2.30    3.47 
   7 -11  -2    6.00    2.78 
  -7  11   2    4.36    3.03 
   6 -11  -2    0.42    2.21 
   6 -11  -2    1.50    3.24 
  -6  11   2   10.25    3.63 
  -6  11   2   -0.67    1.53 
   5 -11  -2   21.01    4.76 
   5 -11  -2   17.84    3.24 
  -5  11   2   25.00    3.08 
  -5  11   2   22.63    4.26 
   4 -11  -2   -0.62    1.58 
   4 -11  -2    3.89    3.63 
  -4  11   2    0.97    2.25 
  -4  11   2   -2.66    1.20 
   3 -11  -2    4.38    1.92 
   3 -11  -2   -0.18    3.05 
  -3  11   2    3.13    2.50 
  -3  11   2    1.31    1.85 
   2 -11  -2    2.65    1.61 
   2 -11  -2   -1.70    2.94 
  -2  11   2    0.95    1.78 
  -2  11   2   -2.92    1.75 
   1 -11  -2   30.38    5.71 
   1 -11  -2   30.33    2.99 
  -1  11   2   31.56    3.82 
  -1  11   2   18.77    3.43 
   0 -11  -2    4.60    3.97 
   0 -11  -2   -0.41    1.70 
   0  11   2    0.57    1.74 
   0  11   2    0.72    1.74 
  -1 -11  -2   12.67    2.73 
  -1 -11  -2   18.16    4.92 
   1  11   2   16.44    3.41 
   1  11   2   11.97    2.60 
  -2 -11  -2   42.48    4.14 
  -2 -11  -2   32.76    6.52 
   2  11   2   40.80    3.50 
   2  11   2   31.16    4.14 
  -3 -11  -2   31.90    4.34 
  -3 -11  -2   30.97    6.35 
   3  11   2   30.28    3.00 
   3  11   2   35.56    4.29 
  -4 -11  -2   53.22    5.39 
  -4 -11  -2   40.43    6.67 
   4  11   2   58.59    4.95 
   4  11   2   52.38    3.66 
  -5 -11  -2   16.82    4.02 
   5  11   2   14.88    2.34 
   5  11   2   13.30    3.34 
  -6 -11  -2    6.27    3.56 
   6  11   2    9.94    3.06 
  -7 -11  -2    5.54    3.62 
   7  11   2    2.20    2.19 
  -8 -11  -2    3.56    4.10 
   8  11   2    5.10    2.79 
  -9 -11  -2   -4.50    3.34 
   9  11   2    1.04    2.41 
 -10 -11  -2    8.39    4.90 
  10  11   2    6.26    3.07 
   9 -12  -2   28.13    6.54 
  -9  12   2   37.55    5.87 
   8 -12  -2    7.28    4.48 
  -8  12   2   13.56    4.12 
   7 -12  -2   38.03    6.97 
  -7  12   2   30.62    5.66 
   6 -12  -2    1.92    3.47 
  -6  12   2   -2.89    1.55 
  -6  12   2   -1.37    2.32 
   5 -12  -2   -2.01    2.95 
  -5  12   2    2.49    2.68 
  -5  12   2    4.73    2.18 
   4 -12  -2   40.73    6.40 
  -4  12   2   39.55    3.93 
  -4  12   2   39.27    4.86 
   3 -12  -2   29.02    5.83 
  -3  12   2   31.93    3.80 
  -3  12   2   33.09    4.33 
   2 -12  -2    6.17    3.48 
  -2  12   2    3.45    2.11 
  -2  12   2    3.51    2.24 
   1 -12  -2    6.86    4.03 
  -1  12   2   10.93    2.78 
  -1  12   2   13.93    2.98 
   0 -12  -2    0.75    3.49 
   0  12   2   -1.79    1.44 
   0  12   2   -0.04    1.73 
  -1 -12  -2    1.55    3.15 
   1  12   2    3.03    2.18 
   1  12   2    0.43    1.58 
  -2 -12  -2    8.50    4.22 
   2  12   2    4.91    2.59 
   2  12   2    7.06    2.24 
  -3 -12  -2    8.13    4.69 
   3  12   2    5.30    2.64 
   3  12   2    9.59    2.26 
  -4 -12  -2    9.55    5.02 
  -4 -12  -2   13.78    4.00 
   4  12   2    6.23    2.10 
   4  12   2    3.70    2.71 
  -5 -12  -2   -8.82    2.88 
  -5 -12  -2    7.28    4.85 
   5  12   2   -1.79    2.07 
  -6 -12  -2   18.13    4.62 
   6  12   2   16.48    3.90 
  -7 -12  -2    8.45    4.33 
   7  12   2   -1.50    1.86 
  -8 -12  -2   -5.33    3.28 
   8  12   2    0.91    2.39 
  -9 -12  -2    5.12    4.45 
   9  12   2    4.89    3.19 
   8 -13  -2    6.08    4.31 
  -8  13   2    0.27    2.73 
   7 -13  -2    0.17    3.77 
  -7  13   2    7.47    3.54 
   6 -13  -2    3.49    3.35 
  -6  13   2   -2.49    1.74 
  -6  13   2    5.17    2.91 
   5 -13  -2   -0.25    3.48 
  -5  13   2    1.92    2.03 
  -5  13   2    2.07    3.16 
   4 -13  -2   -0.48    3.64 
  -4  13   2   -0.13    2.09 
  -4  13   2   -0.36    1.86 
   3 -13  -2    3.15    3.81 
  -3  13   2    7.38    2.70 
  -3  13   2    2.56    2.13 
   2 -13  -2   -7.79    2.67 
  -2  13   2    2.79    2.53 
  -2  13   2   -2.03    1.59 
   1 -13  -2    3.46    3.67 
  -1  13   2    1.29    1.88 
  -1  13   2   -0.97    1.99 
   0 -13  -2   -3.93    3.33 
   0  13   2    0.96    1.99 
   0  13   2    0.22    2.04 
  -1 -13  -2   -0.19    3.44 
   1  13   2    0.61    2.12 
   1  13   2    3.62    1.93 
  -2 -13  -2    2.20    3.71 
   2  13   2    1.60    1.70 
   2  13   2   -3.16    1.70 
  -3 -13  -2   10.31    5.35 
   3  13   2    8.57    2.46 
   3  13   2   11.71    3.46 
  -4 -13  -2   -4.35    3.23 
   4  13   2   -0.09    2.22 
  -5 -13  -2   -1.87    3.71 
   5  13   2    4.24    2.64 
  -6 -13  -2    1.37    4.70 
   6  13   2   -0.20    2.09 
   7  13   2    0.40    2.23 
   8  13   2   17.83    4.49 
   6 -14  -2    1.39    3.78 
  -6  14   2    1.75    2.92 
  -6  14   2   -0.19    1.99 
   5 -14  -2   -0.97    3.64 
  -5  14   2    0.92    2.39 
  -5  14   2    3.51    2.40 
   4 -14  -2   -0.35    3.44 
  -4  14   2    9.18    2.97 
  -4  14   2    3.75    2.83 
   3 -14  -2    9.45    4.63 
  -3  14   2   17.23    3.68 
  -3  14   2   19.14    3.95 
   2 -14  -2    8.72    4.54 
  -2  14   2    7.98    2.94 
  -2  14   2    2.70    2.49 
   1 -14  -2    0.67    3.69 
  -1  14   2    1.99    2.36 
  -1  14   2    1.80    2.19 
   0 -14  -2    1.04    3.81 
   0  14   2   -0.62    1.69 
   0  14   2    2.76    2.46 
  -1 -14  -2    6.45    4.91 
   1  14   2   10.65    2.75 
   1  14   2   12.22    3.60 
  -2 -14  -2   -1.75    3.72 
   2  14   2   -0.45    2.32 
   2  14   2    6.49    2.22 
  -3 -14  -2   -4.40    3.40 
   3  14   2    1.99    2.18 
  -4 -14  -2    8.46    5.37 
   4  14   2   -1.36    1.87 
  -5 -14  -2   -2.54    4.23 
   5  14   2    0.14    2.00 
  -6 -14  -2    9.67    5.45 
   6  14   2    0.53    2.73 
   4 -15  -2    1.58    4.29 
  -4  15   2    8.46    3.37 
  -4  15   2    6.95    3.00 
   3 -15  -2   -2.30    3.72 
  -3  15   2   -2.47    1.96 
  -3  15   2    4.44    2.75 
   2 -15  -2   -4.54    3.29 
  -2  15   2    7.73    3.22 
  -2  15   2    1.30    2.19 
   1 -15  -2    0.83    3.92 
  -1  15   2    3.12    2.46 
  -1  15   2   -1.69    1.77 
   0 -15  -2   11.30    5.00 
   0  15   2   12.80    3.07 
   0  15   2   30.37    4.56 
  -1 -15  -2   -4.91    3.91 
   1  15   2    1.77    2.56 
   1  15   2   -0.31    2.06 
  -2 -15  -2    8.76    4.90 
   2  15   2    5.43    3.10 
  -3 -15  -2    3.99    4.66 
   3  15   2    1.46    2.69 
  -4 -15  -2    4.57    4.72 
   4  15   2    2.30    2.78 
   1 -15   3    2.35    4.62 
   2 -15   3    1.72    3.94 
   3  14  -3    0.77    2.57 
  -3 -14   3    1.83    4.28 
  -3 -14   3   -1.58    3.32 
   2  14  -3   -1.97    2.11 
  -2 -14   3    4.08    5.07 
  -2 -14   3   -7.12    3.05 
   1  14  -3   20.20    4.43 
  -1 -14   3   14.49    5.75 
  -1 -14   3   18.66    5.16 
   0  14  -3    2.96    2.64 
   0 -14   3    0.19    3.16 
   0 -14   3    4.26    4.54 
  -1  14  -3   29.92    4.99 
   1 -14   3    8.48    5.19 
   1 -14   3   19.97    5.06 
  -2  14  -3    8.50    3.01 
   2 -14   3    3.74    4.36 
   2 -14   3    8.51    3.81 
  -3  14  -3    8.24    2.91 
  -3  14  -3    3.46    2.66 
   3 -14   3    0.51    3.68 
   3 -14   3    6.15    3.74 
  -4  14  -3    7.06    3.11 
  -4  14  -3   10.77    3.22 
   4 -14   3    3.47    4.19 
   4 -14   3    5.05    3.53 
  -5  14  -3    5.70    3.08 
  -5  14  -3   13.48    3.86 
   5 -14   3    6.33    3.43 
   5 -14   3    2.78    3.48 
  -6  14  -3    8.06    3.21 
  -6  14  -3    0.58    2.86 
   6 -14   3    6.45    4.25 
   6 -14   3    4.09    3.40 
   5  13  -3   -1.73    2.33 
  -5 -13   3    5.75    4.60 
   4  13  -3   -0.75    1.90 
  -4 -13   3    0.84    3.69 
   3  13  -3   10.23    3.32 
  -3 -13   3    7.23    4.78 
  -3 -13   3   18.52    5.50 
   2  13  -3    0.13    1.78 
  -2 -13   3    0.17    3.91 
  -2 -13   3   -0.58    3.35 
   1  13  -3    6.24    3.01 
  -1 -13   3    7.45    4.95 
  -1 -13   3    4.49    4.01 
   0  13  -3    2.58    2.73 
   0 -13   3   -0.64    3.90 
   0 -13   3    3.61    3.97 
  -1  13  -3    0.48    2.07 
   1 -13   3    1.39    3.35 
   1 -13   3    2.31    4.40 
  -2  13  -3   -1.29    1.77 
  -2  13  -3    2.19    1.99 
   2 -13   3   11.33    4.60 
   2 -13   3    5.51    3.53 
  -3  13  -3    3.52    2.39 
  -3  13  -3    2.42    2.39 
   3 -13   3    4.10    3.31 
   3 -13   3   -0.20    3.44 
  -4  13  -3    1.25    2.43 
  -4  13  -3   -0.05    2.12 
   4 -13   3   11.47    3.95 
   4 -13   3   -1.45    3.37 
  -5  13  -3    6.71    3.16 
  -5  13  -3    7.53    3.29 
   5 -13   3    5.98    3.24 
   5 -13   3    5.56    4.25 
  -6  13  -3   -4.41    2.51 
  -6  13  -3    0.78    2.16 
   6 -13   3    5.48    3.96 
   6 -13   3    3.65    3.12 
  -7  13  -3   13.56    4.14 
  -7  13  -3   10.78    3.09 
   7 -13   3   11.99    4.33 
   7 -13   3   12.33    4.76 
  -8  13  -3    2.64    3.51 
   8 -13   3    3.95    3.91 
   8 -13   3   11.33    4.47 
   6  12  -3    5.19    2.90 
  -6 -12   3   -0.66    4.30 
   5  12  -3   -0.66    2.06 
  -5 -12   3    8.24    4.67 
   4  12  -3    2.74    2.49 
  -4 -12   3    6.45    4.53 
   3  12  -3   -2.32    1.65 
  -3 -12   3    4.80    4.28 
   2  12  -3    1.17    2.29 
  -2 -12   3   -0.46    3.68 
  -2 -12   3    1.46    3.70 
   1  12  -3    3.60    2.50 
  -1 -12   3   10.66    4.21 
  -1 -12   3    5.92    4.71 
   0  12  -3    4.20    2.45 
   0 -12   3   10.79    4.87 
   0 -12   3    6.89    4.03 
  -1  12  -3    4.10    2.50 
  -1  12  -3    1.89    1.84 
   1 -12   3    5.05    3.27 
   1 -12   3    3.60    3.74 
  -2  12  -3   -1.26    1.85 
  -2  12  -3   -0.31    1.82 
   2 -12   3   -2.36    3.14 
   2 -12   3   -2.29    2.45 
  -3  12  -3    9.92    2.75 
  -3  12  -3   17.14    3.59 
   3 -12   3    7.91    3.77 
   3 -12   3    4.19    3.46 
  -4  12  -3    0.42    1.88 
  -4  12  -3    4.73    2.91 
   4 -12   3    2.57    3.33 
   4 -12   3    4.33    2.94 
  -5  12  -3    5.06    2.35 
  -5  12  -3    4.35    2.86 
   5 -12   3    3.80    3.25 
   5 -12   3    7.87    3.81 
  -6  12  -3   10.18    3.83 
  -6  12  -3   14.32    3.25 
   6 -12   3   12.94    4.41 
   6 -12   3   16.71    4.29 
  -7  12  -3   -0.41    2.94 
  -7  12  -3    2.14    2.10 
   7 -12   3   -1.35    2.43 
   7 -12   3    0.57    3.38 
  -8  12  -3    0.63    2.94 
   8 -12   3    4.43    3.14 
   8 -12   3    8.24    3.90 
  -9  12  -3    3.14    3.68 
   9 -12   3   -1.22    2.76 
   9 -12   3    7.31    4.68 
   7  11  -3    6.57    3.27 
  -7 -11   3    4.03    4.77 
   6  11  -3    2.88    2.46 
  -6 -11   3    9.82    5.22 
   5  11  -3   18.21    4.05 
  -5 -11   3   18.85    5.62 
   4  11  -3    0.14    2.04 
  -4 -11   3    2.56    3.64 
   3  11  -3    3.66    2.29 
  -3 -11   3   -0.44    3.44 
   2  11  -3    2.56    2.21 
  -2 -11   3    5.21    3.74 
  -2 -11   3    8.72    4.49 
   1  11  -3    1.79    2.08 
  -1 -11   3   -4.56    3.05 
  -1 -11   3   -0.08    3.14 
   0  11  -3    3.29    2.49 
   0  11  -3    7.18    1.88 
   0 -11   3    6.82    4.32 
   0 -11   3    2.16    3.52 
  -1  11  -3    3.95    1.86 
  -1  11  -3   -0.45    1.65 
   1 -11   3   -3.50    2.51 
   1 -11   3    1.45    3.06 
  -2  11  -3   -0.18    2.13 
  -2  11  -3   -1.47    1.45 
   2 -11   3    2.57    2.95 
   2 -11   3   -1.56    3.23 
  -3  11  -3   11.91    2.95 
  -3  11  -3   10.92    3.02 
   3 -11   3   21.19    4.40 
   3 -11   3    6.81    3.72 
  -4  11  -3   25.00    4.33 
  -4  11  -3   24.58    3.46 
   4 -11   3   20.73    4.18 
   4 -11   3   26.49    5.38 
  -5  11  -3   13.99    3.01 
  -5  11  -3   13.52    3.64 
   5 -11   3   15.11    3.90 
   5 -11   3   20.01    4.74 
  -6  11  -3    4.27    2.21 
  -6  11  -3    6.84    3.55 
   6 -11   3    5.85    2.87 
   6 -11   3    8.41    3.70 
  -7  11  -3    0.97    1.99 
  -7  11  -3   -1.66    3.00 
   7 -11   3    2.56    2.95 
   7 -11   3   -0.92    2.56 
  -8  11  -3   48.36    6.34 
   8 -11   3   54.55    6.08 
   8 -11   3   53.11    6.61 
  -9  11  -3    4.70    3.67 
   9 -11   3    8.08    3.76 
   9 -11   3   13.81    4.70 
 -10  11  -3   10.66    4.45 
  10 -11   3    9.57    4.35 
  10 -11   3   12.89    4.35 
   8  10  -3   11.24    4.77 
   8  10  -3   11.53    3.55 
  -8 -10   3   10.29    4.99 
   7  10  -3    0.79    3.43 
   7  10  -3   -0.26    1.86 
  -7 -10   3   -0.68    3.94 
   6  10  -3   14.84    4.79 
   6  10  -3   13.84    3.65 
  -6 -10   3   14.39    5.25 
   5  10  -3   -2.26    1.86 
  -5 -10   3    3.17    4.23 
   4  10  -3   28.17    3.88 
  -4 -10   3   32.11    6.10 
   3  10  -3   49.29    4.80 
  -3 -10   3   54.76    6.35 
   2  10  -3   30.86    3.98 
  -2 -10   3   34.39    5.53 
   1  10  -3   35.95    4.43 
   1  10  -3   33.76    2.44 
  -1 -10   3   39.58    5.81 
  -1 -10   3   28.96    6.19 
   0  10  -3    3.22    2.17 
   0  10  -3   -0.77    1.43 
   0 -10   3    2.16    3.26 
   0 -10   3   -6.34    3.04 
  -1  10  -3   19.77    2.93 
  -1  10  -3   30.54    3.93 
   1 -10   3   23.76    5.52 
   1 -10   3   28.97    5.33 
  -2  10  -3    4.63    2.41 
  -2  10  -3    2.34    2.16 
   2 -10   3   -4.36    3.08 
   2 -10   3   -4.26    2.69 
  -3  10  -3   26.51    4.26 
  -3  10  -3   18.73    3.39 
   3 -10   3   25.42    4.73 
   3 -10   3   26.49    5.17 
  -4  10  -3   24.91    3.47 
  -4  10  -3   27.49    4.27 
   4 -10   3   20.80    4.62 
   4 -10   3   16.23    4.27 
  -5  10  -3    0.63    1.93 
  -5  10  -3    2.25    2.71 
   5 -10   3    1.11    2.64 
   5 -10   3    4.93    3.25 
  -6  10  -3    3.14    1.81 
  -6  10  -3    7.27    3.17 
   6 -10   3    5.72    3.26 
   6 -10   3    5.20    3.11 
  -7  10  -3    4.22    3.29 
  -7  10  -3    5.27    2.07 
   7 -10   3    1.35    2.79 
   7 -10   3    7.56    3.31 
  -8  10  -3    5.19    3.43 
   8 -10   3    1.58    3.29 
   8 -10   3    4.92    2.89 
  -9  10  -3    7.23    3.90 
   9 -10   3    7.85    3.32 
   9 -10   3    6.89    3.74 
 -10  10  -3    0.32    3.19 
  10 -10   3    2.74    3.18 
  10 -10   3    0.10    3.11 
 -11  10  -3    4.60    3.80 
  11 -10   3    2.63    3.25 
  11 -10   3    3.69    3.60 
   9   9  -3    6.82    3.91 
   9   9  -3    2.24    2.37 
  -9  -9   3   -3.11    4.02 
   8   9  -3   38.26    4.62 
   8   9  -3   53.38    7.02 
  -8  -9   3   36.64    7.32 
   7   9  -3    1.60    2.99 
   7   9  -3    1.46    2.12 
  -7  -9   3   -3.86    3.75 
   6   9  -3    3.36    3.36 
   6   9  -3    4.66    2.50 
  -6  -9   3    5.15    4.19 
   5   9  -3    2.87    1.95 
   5   9  -3    0.67    2.81 
  -5  -9   3    4.99    3.83 
   4   9  -3   -1.01    1.82 
  -4  -9   3   -3.40    3.60 
   3   9  -3    8.66    2.70 
  -3  -9   3    9.82    4.99 
   2   9  -3    0.56    1.94 
  -2  -9   3    1.78    3.81 
   1   9  -3   -0.16    1.87 
   1   9  -3    2.96    1.25 
  -1  -9   3    1.83    3.20 
   0   9  -3    6.10    2.46 
   0   9  -3   10.16    2.04 
   0  -9   3    8.01    4.33 
   0  -9   3   12.43    4.14 
  -1   9  -3   26.92    3.82 
  -1   9  -3   28.82    3.13 
   1  -9   3   24.63    5.06 
   1  -9   3   32.82    5.23 
  -2   9  -3    2.95    2.26 
  -2   9  -3    0.45    1.93 
   2  -9   3   -2.29    2.56 
   2  -9   3   -3.02    2.92 
  -3   9  -3   29.04    4.05 
  -3   9  -3   23.25    3.43 
   3  -9   3   27.15    4.72 
   3  -9   3   17.11    4.22 
  -4   9  -3    8.07    2.47 
  -4   9  -3   11.14    3.33 
   4  -9   3    8.23    3.51 
   4  -9   3    7.40    3.47 
  -5   9  -3   28.05    4.77 
  -5   9  -3   33.90    3.54 
   5  -9   3   27.89    5.15 
   5  -9   3   30.41    4.54 
  -6   9  -3   30.45    3.25 
  -6   9  -3   27.33    4.82 
   6  -9   3   24.91    4.67 
   6  -9   3   20.17    4.24 
  -7   9  -3    0.56    1.54 
  -7   9  -3    3.21    3.04 
   7  -9   3    1.15    2.67 
   7  -9   3    2.40    2.72 
  -8   9  -3   -0.70    2.77 
  -8   9  -3    7.75    2.14 
   8  -9   3    0.09    2.45 
   8  -9   3    5.35    3.25 
  -9   9  -3   28.03    5.51 
   9  -9   3   20.32    4.54 
   9  -9   3   29.22    4.76 
 -10   9  -3   -3.05    2.86 
  10  -9   3    3.38    3.07 
  10  -9   3    2.00    2.92 
 -11   9  -3   -0.94    3.21 
  11  -9   3    3.28    3.42 
  11  -9   3    2.15    3.21 
  12  -9   3   -0.28    2.98 
  10   8  -3    7.38    2.77 
  10   8  -3    3.25    3.71 
 -10  -8   3    7.98    6.03 
   9   8  -3   10.99    4.29 
   9   8  -3   10.92    3.39 
  -9  -8   3    4.93    4.77 
   8   8  -3    2.32    2.14 
   8   8  -3    7.38    3.95 
  -8  -8   3    2.44    4.83 
   7   8  -3    7.99    3.72 
   7   8  -3   13.78    3.37 
  -7  -8   3   14.37    5.19 
   6   8  -3    0.96    2.71 
   6   8  -3    7.59    2.47 
  -6  -8   3   -1.54    3.64 
   5   8  -3   39.26    4.28 
   5   8  -3   31.32    4.89 
  -5  -8   3   42.65    6.54 
   4   8  -3   37.67    5.48 
   4   8  -3   38.90    4.26 
  -4  -8   3   33.45    6.02 
   3   8  -3    4.22    2.23 
  -3  -8   3   -2.85    3.89 
   2   8  -3   27.41    1.45 
   2   8  -3   24.74    3.48 
  -2  -8   3   31.88    5.05 
   1   8  -3    7.56    1.45 
   1   8  -3    4.12    2.18 
  -1  -8   3    7.12    3.65 
   0   8  -3   -1.10    1.61 
   0   8  -3    1.10    1.34 
   0  -8   3    4.88    3.36 
   0  -8   3    0.35    2.93 
  -1   8  -3    4.27    2.06 
  -1   8  -3    6.91    2.15 
   1  -8   3   -2.79    2.22 
   1  -8   3    4.05    3.07 
  -2   8  -3    4.39    2.09 
  -2   8  -3    6.29    2.37 
   2  -8   3    3.52    2.99 
   2  -8   3    8.63    3.24 
  -3   8  -3    3.51    2.36 
  -3   8  -3    0.83    1.70 
   3  -8   3    3.28    2.73 
   3  -8   3   -0.23    2.48 
  -4   8  -3   15.76    3.46 
  -4   8  -3   11.21    2.66 
   4  -8   3   19.39    4.03 
   4  -8   3   13.00    3.75 
  -5   8  -3    6.71    2.25 
  -5   8  -3    6.75    3.08 
   5  -8   3    6.24    3.12 
   5  -8   3   11.63    3.56 
  -6   8  -3    2.42    1.76 
  -6   8  -3    1.44    2.92 
   6  -8   3    4.65    3.07 
   6  -8   3    0.21    2.73 
  -7   8  -3   15.67    4.22 
  -7   8  -3   17.24    2.52 
   7  -8   3   14.11    4.08 
   7  -8   3   13.23    3.88 
  -8   8  -3   21.03    2.48 
  -8   8  -3   19.04    4.45 
   8  -8   3   10.77    3.69 
   8  -8   3   18.41    4.34 
  -9   8  -3    1.17    3.40 
   9  -8   3   -3.43    2.02 
   9  -8   3    0.84    2.60 
 -10   8  -3    9.25    3.98 
  10  -8   3   16.12    4.28 
  10  -8   3    8.19    3.68 
 -11   8  -3   -3.99    2.43 
  11  -8   3   -0.10    3.10 
  11  -8   3    2.93    3.11 
 -12   8  -3   -2.71    3.42 
  12  -8   3    2.32    3.15 
  12  -8   3    2.17    3.32 
  10   7  -3    6.13    2.72 
  10   7  -3    4.47    3.53 
 -10  -7   3    9.69    6.01 
   9   7  -3    9.67    4.03 
   9   7  -3    8.79    2.87 
  -9  -7   3   12.31    5.56 
   8   7  -3   10.65    2.92 
   8   7  -3   11.92    4.43 
  -8  -7   3   15.12    5.28 
   7   7  -3   26.61    3.54 
   7   7  -3   30.35    4.90 
  -7  -7   3   39.07    7.00 
   6   7  -3    1.94    2.73 
   6   7  -3    4.37    2.11 
  -6  -7   3    3.05    4.23 
   5   7  -3   -0.50    2.34 
   5   7  -3    0.06    1.99 
  -5  -7   3    6.57    4.16 
   4   7  -3   31.97    4.57 
   4   7  -3   19.89    3.46 
  -4  -7   3   28.27    5.30 
   3   7  -3    3.07    2.02 
   3   7  -3    6.46    3.14 
  -3  -7   3    5.58    3.93 
   2   7  -3    5.21    2.07 
  -2  -7   3   -1.20    3.29 
   1   7  -3    5.45    2.18 
   1   7  -3    4.83    1.15 
  -1  -7   3    3.10    2.87 
   0   7  -3    5.71    2.05 
   0   7  -3    6.43    1.59 
   0  -7   3    3.60    3.10 
  -1   7  -3   27.84    3.23 
  -1   7  -3   27.43    2.75 
   1  -7   3   32.22    3.98 
   1  -7   3   29.45    4.62 
  -2   7  -3   22.52    2.82 
  -2   7  -3   25.33    3.08 
   2  -7   3   25.95    3.82 
   2  -7   3   28.53    3.81 
  -3   7  -3   -1.46    1.40 
  -3   7  -3   -3.40    1.85 
   3  -7   3    2.62    2.44 
   3  -7   3    1.94    2.31 
  -4   7  -3   -1.49    1.25 
  -4   7  -3   -1.27    2.11 
   4  -7   3   -1.58    2.03 
   4  -7   3   -0.74    2.22 
  -5   7  -3   57.16    3.74 
  -5   7  -3   41.86    4.65 
   5  -7   3   49.55    4.84 
   5  -7   3   50.10    4.85 
  -6   7  -3   94.76    4.67 
  -6   7  -3  104.30    6.94 
   6  -7   3   82.78    6.01 
   6  -7   3  100.76    6.44 
  -7   7  -3    0.47    1.46 
  -7   7  -3   -0.10    3.07 
   7  -7   3   -0.55    2.54 
   7  -7   3   -4.75    1.93 
  -8   7  -3    2.12    3.14 
  -8   7  -3    2.79    1.44 
   8  -7   3    5.82    3.34 
   8  -7   3    2.86    2.81 
  -9   7  -3   14.64    4.28 
   9  -7   3   16.32    4.09 
   9  -7   3   12.32    3.90 
 -10   7  -3   -3.00    2.86 
  10  -7   3    4.99    3.36 
  10  -7   3    4.34    3.16 
 -11   7  -3    7.29    4.23 
  11  -7   3    0.86    2.94 
  11  -7   3   -0.92    2.81 
 -12   7  -3    0.78    3.48 
  12  -7   3   -1.03    2.48 
  12  -7   3    0.91    2.96 
 -13   7  -3    7.67    4.25 
  13  -7   3   11.30    4.42 
  13  -7   3    6.04    4.25 
  11   6  -3    0.97    3.00 
 -11  -6   3    0.72    4.92 
  10   6  -3    3.72    3.51 
  10   6  -3    1.62    2.12 
 -10  -6   3    0.75    4.86 
   9   6  -3    6.77    2.31 
   9   6  -3   15.51    4.71 
  -9  -6   3    5.52    4.90 
   8   6  -3   10.63    2.75 
   8   6  -3   18.22    4.70 
  -8  -6   3    8.25    4.55 
   7   6  -3    4.66    2.19 
   7   6  -3    7.91    3.36 
  -7  -6   3    8.54    4.55 
   6   6  -3   16.55    3.22 
   6   6  -3   18.12    4.24 
  -6  -6   3   11.83    4.99 
   5   6  -3    4.63    3.06 
   5   6  -3    2.48    1.97 
  -5  -6   3    3.22    4.00 
   4   6  -3   -0.70    1.65 
   4   6  -3    2.08    2.58 
  -4  -6   3   -0.74    3.29 
   3   6  -3    9.30    2.92 
   3   6  -3    7.94    2.42 
  -3  -6   3   10.17    3.72 
   2   6  -3    0.93    1.88 
   2   6  -3   -1.08    1.32 
  -2  -6   3    3.37    2.94 
   1   6  -3   47.16    2.06 
   1   6  -3   44.15    3.46 
  -1  -6   3   42.98    4.68 
   0   6  -3    7.65    2.01 
   0   6  -3    9.89    1.62 
   0  -6   3    7.94    2.94 
  -1   6  -3   68.85    3.69 
  -1   6  -3   79.32    4.34 
   1  -6   3   71.92    5.12 
   1  -6   3   62.94    4.81 
  -2   6  -3   -0.99    1.23 
  -2   6  -3    0.79    1.62 
   2  -6   3   -1.67    1.80 
   2  -6   3   -0.65    1.71 
  -3   6  -3   48.32    3.79 
  -3   6  -3   45.04    3.31 
   3  -6   3   44.81    4.23 
   3  -6   3   51.73    4.16 
  -4   6  -3   41.65    4.06 
  -4   6  -3   32.47    2.91 
   4  -6   3   32.70    3.74 
   4  -6   3   30.04    3.69 
  -5   6  -3   53.88    4.73 
  -5   6  -3   53.92    3.32 
   5  -6   3   49.54    4.42 
   5  -6   3   56.69    4.54 
  -6   6  -3  160.04    8.15 
  -6   6  -3  165.16    5.89 
   6  -6   3  159.62    7.64 
   6  -6   3  174.63    8.31 
  -7   6  -3   16.85    4.09 
  -7   6  -3   10.11    1.93 
   7  -6   3    6.85    3.17 
   7  -6   3   11.48    3.43 
  -8   6  -3   14.72    2.04 
  -8   6  -3   20.46    4.86 
   8  -6   3   10.02    3.25 
   8  -6   3   18.78    4.13 
  -9   6  -3    2.68    2.90 
   9  -6   3    3.94    2.96 
   9  -6   3   -0.58    2.48 
 -10   6  -3   10.44    4.00 
  10  -6   3   16.72    4.29 
  10  -6   3    8.08    3.41 
 -11   6  -3   23.97    5.24 
  11  -6   3   27.18    5.42 
  11  -6   3   25.28    5.12 
 -12   6  -3    6.42    4.20 
  12  -6   3    8.09    3.69 
  12  -6   3    9.24    4.07 
 -13   6  -3    5.18    3.74 
  13  -6   3   -0.67    3.08 
  13  -6   3   -0.40    2.96 
  11   5  -3    7.04    4.01 
 -11  -5   3   -6.41    4.09 
  10   5  -3    9.42    2.47 
  10   5  -3   16.35    4.90 
 -10  -5   3    8.68    5.57 
   9   5  -3   16.50    4.41 
   9   5  -3   15.37    2.93 
  -9  -5   3   12.34    4.98 
   8   5  -3    4.57    3.12 
   8   5  -3    5.05    1.85 
  -8  -5   3    1.55    3.89 
   7   5  -3   -0.85    2.44 
   7   5  -3    0.10    1.54 
  -7  -5   3   -2.71    4.34 
   6   5  -3   24.57    3.27 
   6   5  -3   24.81    4.50 
  -6  -5   3   21.26    5.23 
   5   5  -3  106.14    5.67 
   5   5  -3  118.42    7.26 
  -5  -5   3  102.21    7.72 
   4   5  -3   12.97    3.20 
   4   5  -3   11.66    2.49 
  -4  -5   3   16.10    4.06 
   3   5  -3   17.35    2.52 
   3   5  -3   12.79    2.94 
  -3  -5   3   27.75    4.65 
   2   5  -3    2.32    1.98 
   2   5  -3   -0.75    1.13 
  -2  -5   3   -1.39    2.45 
   1   5  -3   21.33    1.38 
   1   5  -3   19.15    2.89 
   1   5  -3   16.52    2.33 
  -1  -5   3   22.09    3.91 
   0   5  -3  160.87    6.28 
   0   5  -3  167.89    5.10 
   0  -5   3  171.66    7.52 
  -1   5  -3    0.87    1.30 
  -1   5  -3    0.27    1.23 
   1  -5   3    0.04    1.83 
   1  -5   3   -1.44    1.61 
  -2   5  -3   15.07    2.51 
  -2   5  -3   13.38    2.20 
   2  -5   3   16.89    2.75 
   2  -5   3    7.30    2.37 
  -3   5  -3   -0.29    1.13 
  -3   5  -3   -0.02    1.60 
   3  -5   3    2.64    2.03 
   3  -5   3   -1.84    1.55 
  -4   5  -3   42.63    3.80 
  -4   5  -3   43.69    2.96 
   4  -5   3   49.14    3.80 
   4  -5   3   38.71    3.80 
  -5   5  -3    0.41    1.12 
  -5   5  -3    0.66    2.02 
   5  -5   3    1.31    1.99 
   5  -5   3    1.49    1.80 
  -6   5  -3    8.62    2.97 
  -6   5  -3   15.41    2.05 
   6  -5   3   18.01    3.38 
   6  -5   3   18.83    3.63 
  -7   5  -3   12.10    1.79 
  -7   5  -3   15.48    3.78 
   7  -5   3   14.48    3.51 
   7  -5   3   13.47    3.37 
  -8   5  -3   16.43    1.82 
  -8   5  -3   20.14    4.45 
   8  -5   3    9.33    3.36 
   8  -5   3   16.01    3.69 
  -9   5  -3   51.83    5.94 
   9  -5   3   56.15    5.54 
   9  -5   3   51.49    5.71 
 -10   5  -3   38.92    5.60 
  10  -5   3   49.14    5.33 
  10  -5   3   47.24    5.51 
 -11   5  -3    5.33    3.69 
  11  -5   3    8.89    3.52 
  11  -5   3   12.14    4.02 
 -12   5  -3   15.42    4.95 
  12  -5   3   10.03    4.05 
  12  -5   3   10.90    4.33 
 -13   5  -3    2.35    3.65 
  13  -5   3    5.08    3.36 
  13  -5   3    4.91    3.60 
  12   4  -3   -2.10    3.14 
 -12  -4   3    3.04    5.00 
  11   4  -3   -3.10    2.38 
 -11  -4   3   -2.90    4.24 
  10   4  -3    0.80    1.68 
  10   4  -3   -0.11    3.04 
 -10  -4   3    2.11    4.98 
   9   4  -3   -1.57    2.47 
   9   4  -3    2.97    1.82 
  -9  -4   3   -1.29    3.81 
   8   4  -3   33.88    5.28 
   8   4  -3   23.10    2.93 
  -8  -4   3   22.55    5.69 
   7   4  -3   36.08    5.25 
   7   4  -3   24.18    3.50 
  -7  -4   3   25.69    2.35 
  -7  -4   3   23.15    5.68 
   6   4  -3   66.96    5.93 
   6   4  -3   69.17    4.47 
  -6  -4   3   67.02    2.66 
  -6  -4   3   69.22    7.14 
   5   4  -3    3.29    1.74 
   5   4  -3    4.19    2.58 
  -5  -4   3    1.79    3.17 
   4   4  -3   50.65    3.50 
   4   4  -3   47.21    4.51 
  -4  -4   3   45.48    5.08 
   3   4  -3   20.08    3.02 
   3   4  -3   17.14    2.30 
  -3  -4   3   17.48    3.70 
   2   4  -3    0.32    1.17 
   2   4  -3   -0.24    1.49 
  -2  -4   3   -1.13    2.09 
   1   4  -3  284.91    9.38 
   1   4  -3  283.47    8.73 
   1   4  -3  281.97    6.49 
  -1  -4   3  278.21    9.97 
   0   4  -3  313.07    9.35 
   0   4  -3  321.07    7.99 
   0  -4   3  311.63   10.40 
  -1   4  -3    7.11    1.77 
  -1   4  -3    6.45    1.73 
   1  -4   3   10.45    2.45 
   1  -4   3    5.09    2.38 
  -2   4  -3   23.61    2.55 
  -2   4  -3   24.42    2.30 
   2  -4   3   22.75    3.06 
   2  -4   3   21.01    2.59 
  -3   4  -3    1.16    1.59 
  -3   4  -3    3.23    1.39 
   3  -4   3    0.27    1.51 
   3  -4   3    1.77    1.91 
  -4   4  -3    1.49    1.87 
  -4   4  -3   -1.12    1.01 
   4  -4   3   -0.22    1.44 
   4  -4   3   -0.53    1.60 
  -5   4  -3   -1.57    0.89 
  -5   4  -3    0.77    1.85 
   5  -4   3    0.90    1.84 
   5  -4   3    1.77    1.76 
  -6   4  -3    6.90    1.49 
  -6   4  -3    9.41    3.01 
   6  -4   3    8.24    2.45 
   6  -4   3   10.03    3.03 
  -7   4  -3   27.79    4.22 
  -7   4  -3   30.15    2.04 
   7  -4   3   22.87    3.67 
   7  -4   3   20.82    3.31 
  -8   4  -3    6.42    1.19 
  -8   4  -3    1.43    2.74 
   8  -4   3    6.56    2.93 
   8  -4   3    6.16    2.71 
  -9   4  -3    2.13    3.20 
   9  -4   3    1.51    2.46 
   9  -4   3    1.65    2.61 
 -10   4  -3    5.70    3.61 
  10  -4   3    6.24    3.34 
  10  -4   3    6.33    3.27 
 -11   4  -3    4.30    3.52 
  11  -4   3    2.66    2.98 
  11  -4   3    1.78    2.87 
 -12   4  -3    3.86    4.05 
  12  -4   3    9.23    3.85 
  12  -4   3    8.28    3.50 
 -13   4  -3   -2.38    3.21 
  13  -4   3   -1.31    2.37 
  13  -4   3    1.00    3.05 
 -14   4  -3    1.57    3.91 
  14  -4   3    4.06    3.68 
  14  -4   3    2.16    3.26 
  12   3  -3    7.32    4.47 
 -12  -3   3   15.66    6.38 
  11   3  -3   16.50    5.13 
 -11  -3   3   20.95    7.13 
  10   3  -3    2.62    1.67 
  10   3  -3   13.15    4.56 
 -10  -3   3    7.51    5.23 
   9   3  -3    8.45    2.13 
   9   3  -3   14.98    4.47 
  -9  -3   3   13.43    5.18 
  -9  -3   3   14.14    2.68 
   8   3  -3   45.52    3.51 
   8   3  -3   46.50    5.72 
  -8  -3   3   46.77    7.31 
  -8  -3   3   58.27    3.88 
   7   3  -3    1.54    2.44 
   7   3  -3   -1.26    1.33 
  -7  -3   3    0.58    1.68 
  -7  -3   3    3.38    4.15 
   6   3  -3   32.46    4.52 
   6   3  -3   28.67    2.88 
  -6  -3   3   26.16    5.34 
  -6  -3   3   30.71    2.38 
   5   3  -3   70.91    5.54 
   5   3  -3   73.02    4.05 
  -5  -3   3   69.47    2.77 
  -5  -3   3   74.12    6.39 
   4   3  -3   53.94    4.55 
   4   3  -3   51.12    3.38 
  -4  -3   3   45.77    4.94 
   3   3  -3   43.95    3.01 
   3   3  -3   45.43    4.00 
  -3  -3   3   46.98    4.52 
   2   3  -3    2.81    1.66 
   2   3  -3   -0.38    1.20 
  -2  -3   3    3.39    2.30 
   1   3  -3  129.20    5.17 
   1   3  -3  152.32    5.89 
  -1  -3   3  132.48    6.31 
   0   3  -3    0.32    1.24 
   0   3  -3    0.20    1.25 
   0  -3   3    1.22    1.88 
  -1   3  -3   12.33    2.01 
   1  -3   3   17.44    3.05 
  -2   3  -3  204.04    6.51 
  -2   3  -3  219.74    6.80 
   2  -3   3  221.68    6.61 
   2  -3   3  207.83    7.57 
  -3   3  -3   72.65    3.45 
  -3   3  -3   73.55    4.12 
   3  -3   3   77.05    4.52 
   3  -3   3   74.17    3.51 
  -4   3  -3  133.77    5.87 
  -4   3  -3  136.65    4.72 
   4  -3   3  138.04    6.21 
   4  -3   3  136.76    5.20 
  -5   3  -3   54.14    4.21 
  -5   3  -3   63.74    2.97 
   5  -3   3   56.08    4.16 
   5  -3   3   57.19    3.71 
  -6   3  -3   88.58    5.50 
  -6   3  -3   86.22    3.39 
   6  -3   3   84.43    5.29 
   6  -3   3   78.90    4.71 
  -7   3  -3   12.95    1.49 
  -7   3  -3    9.82    3.25 
   7  -3   3   10.58    2.80 
   7  -3   3   10.70    2.90 
  -8   3  -3    1.76    2.95 
  -8   3  -3    0.80    0.81 
   8  -3   3    0.86    2.42 
   8  -3   3    1.00    2.21 
  -9   3  -3    9.45    3.77 
   9  -3   3   16.85    3.85 
   9  -3   3    9.95    3.26 
 -10   3  -3    7.53    3.80 
  10  -3   3    1.67    3.08 
  10  -3   3    5.65    3.23 
 -11   3  -3   42.28    5.77 
  11  -3   3   52.45    5.61 
  11  -3   3   36.62    5.58 
 -12   3  -3   27.29    5.64 
  12  -3   3   26.51    5.69 
  12  -3   3   33.77    6.05 
 -13   3  -3    1.17    3.67 
  13  -3   3    0.96    3.18 
  13  -3   3   -0.01    2.96 
 -14   3  -3   -2.41    3.49 
  14  -3   3   -2.12    3.06 
  14  -3   3    1.50    3.34 
  12   2  -3    4.59    4.23 
 -12  -2   3    8.17    5.39 
  11   2  -3    6.33    4.14 
 -11  -2   3    5.20    4.57 
  10   2  -3    2.82    3.27 
 -10  -2   3   -0.91    2.26 
 -10  -2   3   -2.76    4.11 
   9   2  -3  115.54    8.82 
  -9  -2   3  122.83    5.94 
  -9  -2   3  118.21    9.44 
   8   2  -3   11.89    2.22 
   8   2  -3    6.29    3.22 
  -8  -2   3   10.77    2.77 
  -8  -2   3   18.07    5.19 
   7   2  -3   12.36    3.79 
   7   2  -3   11.21    2.18 
  -7  -2   3   13.86    2.53 
  -7  -2   3    4.59    4.04 
   6   2  -3   54.40    5.37 
   6   2  -3   55.29    3.38 
  -6  -2   3   49.64    5.99 
  -6  -2   3   54.72    3.33 
   5   2  -3   74.81    5.54 
   5   2  -3   82.20    3.99 
  -5  -2   3   85.58    3.50 
  -5  -2   3   85.78    6.55 
   4   2  -3  109.19    4.59 
   4   2  -3  101.62    6.06 
  -4  -2   3  112.65    6.67 
  -4  -2   3  110.88    3.58 
   3   2  -3    5.78    1.56 
   3   2  -3    7.86    2.35 
  -3  -2   3    6.05    0.94 
  -3  -2   3    6.61    2.53 
   2   2  -3   39.30    2.68 
   2   2  -3   38.58    3.30 
  -2  -2   3   36.81    3.75 
   1   2  -3   17.70    2.10 
   1   2  -3   22.17    2.44 
  -1  -2   3   19.12    1.20 
  -1  -2   3   17.75    2.89 
   0   2  -3  376.26    9.74 
   0   2  -3  376.64    9.82 
   0  -2   3  375.93    8.71 
   0  -2   3  367.58   10.77 
  -1   2  -3   11.89    1.91 
   1  -2   3   15.39    2.75 
  -2   2  -3    0.80    1.27 
   2  -2   3   -1.29    1.09 
   2  -2   3   -1.17    1.63 
  -3   2  -3   -1.39    1.04 
   3  -2   3    0.99    1.60 
   3  -2   3    1.15    1.15 
  -4   2  -3  491.53   11.81 
   4  -2   3  504.83   13.85 
   4  -2   3  493.28   12.46 
  -5   2  -3   32.41    2.17 
  -5   2  -3   31.32    3.27 
   5  -2   3   33.62    2.93 
   5  -2   3   27.03    3.10 
  -6   2  -3   23.61    1.91 
  -6   2  -3   19.09    3.18 
   6  -2   3   23.64    3.01 
   6  -2   3   19.17    2.80 
  -7   2  -3    6.49    2.91 
  -7   2  -3    6.86    1.32 
   7  -2   3    5.14    2.41 
   7  -2   3    8.52    2.72 
  -8   2  -3   16.40    1.63 
  -8   2  -3   16.29    4.02 
   8  -2   3   26.49    3.82 
   8  -2   3   20.82    3.78 
  -9   2  -3  182.71    9.53 
   9  -2   3  181.82    9.40 
   9  -2   3  192.46    9.21 
 -10   2  -3   10.12    3.87 
  10  -2   3    7.71    3.23 
  10  -2   3    4.97    3.35 
 -11   2  -3    4.59    3.23 
  11  -2   3    5.98    3.11 
  11  -2   3   -0.71    2.46 
 -12   2  -3    2.55    3.57 
  12  -2   3    4.12    3.00 
  12  -2   3    5.93    3.07 
 -13   2  -3    4.96    3.90 
  13  -2   3    1.69    2.97 
  13  -2   3    4.14    3.46 
 -14   2  -3    2.05    4.27 
  14  -2   3   13.83    4.70 
  14  -2   3   14.06    4.76 
  12   1  -3    4.84    4.03 
 -12  -1   3   -3.69    3.82 
  11   1  -3    1.91    3.31 
 -11  -1   3   -2.12    3.70 
 -11  -1   3    5.20    2.85 
  10   1  -3    0.02    3.06 
 -10  -1   3    1.76    2.25 
   9   1  -3    4.72    1.41 
   9   1  -3    3.49    2.76 
  -9  -1   3    4.16    2.45 
   8   1  -3   75.52    3.78 
   8   1  -3   81.77    6.92 
  -8  -1   3   78.44    5.07 
   7   1  -3   65.50    3.55 
   7   1  -3   59.92    5.99 
  -7  -1   3   68.94    4.32 
   6   1  -3   25.31    2.39 
   6   1  -3   26.85    4.16 
  -6  -1   3   22.28    2.71 
  -6  -1   3   23.71    4.92 
   5   1  -3   37.55    4.14 
   5   1  -3   51.07    2.90 
  -5  -1   3   58.37    5.26 
  -5  -1   3   45.32    2.97 
   4   1  -3   19.42    3.18 
   4   1  -3   20.36    2.09 
  -4  -1   3   28.49    4.00 
  -4  -1   3   17.87    1.86 
   3   1  -3    3.06    1.35 
   3   1  -3    7.68    2.15 
  -3  -1   3    6.28    2.46 
  -3  -1   3    6.26    1.19 
   2   1  -3   49.61    3.50 
   2   1  -3   49.38    2.84 
  -2  -1   3   52.10    3.94 
   1   1  -3  335.41    8.96 
   1   1  -3  341.07    9.42 
  -1  -1   3  346.70   10.16 
  -1  -1   3  349.03    7.92 
   0   1  -3    4.50    1.63 
   0   1  -3    3.09    1.34 
   0  -1   3    2.69    0.98 
   0  -1   3    3.07    2.10 
  -1   1  -3   49.40    2.76 
  -1   1  -3   40.23    1.80 
   1  -1   3   40.01    2.22 
   1  -1   3   45.47    3.41 
  -2   1  -3  153.22    4.96 
   2  -1   3  160.18    5.94 
   2  -1   3  157.34    3.94 
   2  -1   3  161.99    5.15 
  -3   1  -3   17.22    1.80 
   3  -1   3   16.25    1.65 
   3  -1   3   16.12    2.59 
  -4   1  -3   28.92    2.09 
   4  -1   3   35.11    2.46 
   4  -1   3   28.94    2.89 
  -5   1  -3    1.13    1.07 
   5  -1   3    3.24    1.67 
   5  -1   3   -0.99    1.30 
  -6   1  -3   26.21    1.94 
   6  -1   3   24.23    2.84 
   6  -1   3   18.38    2.88 
  -7   1  -3    8.84    1.46 
  -7   1  -3   11.65    2.84 
   7  -1   3    9.30    2.46 
   7  -1   3    6.80    2.42 
  -8   1  -3   -1.30    2.42 
  -8   1  -3    2.78    1.22 
   8  -1   3    2.05    2.38 
   8  -1   3    3.50    2.39 
  -9   1  -3   -0.11    2.97 
  -9   1  -3   -3.00    1.02 
   9  -1   3   10.25    3.17 
   9  -1   3    0.55    2.45 
 -10   1  -3    2.28    3.41 
  10  -1   3    0.70    2.53 
  10  -1   3    5.53    3.16 
 -11   1  -3    7.79    3.90 
  11  -1   3   12.57    3.76 
  11  -1   3    1.94    2.59 
 -12   1  -3   23.39    5.11 
  12  -1   3   26.02    5.51 
  12  -1   3   28.78    5.55 
 -13   1  -3    9.55    4.40 
  13  -1   3    4.40    3.39 
  13  -1   3    3.46    3.18 
 -14   1  -3   -2.72    2.76 
  14  -1   3    1.94    3.31 
  14  -1   3   -1.12    3.12 
  12   0  -3    5.44    4.03 
 -12   0   3   17.29    4.03 
  11   0  -3    6.56    3.64 
 -11   0   3    1.72    2.49 
  10   0  -3   -0.95    2.53 
 -10   0   3    1.61    2.40 
   9   0  -3    5.53    3.21 
  -9   0   3    5.25    2.62 
   8   0  -3   32.73    5.28 
   8   0  -3   38.14    2.49 
  -8   0   3   37.05    4.04 
   7   0  -3    2.87    2.65 
   7   0  -3   -0.81    0.99 
  -7   0   3   -0.68    2.04 
   6   0  -3   27.05    2.14 
   6   0  -3   31.52    4.34 
  -6   0   3   28.59    3.08 
   5   0  -3   28.83    3.70 
   5   0  -3   28.42    2.16 
  -5   0   3   37.44    2.88 
   4   0  -3    0.20    1.01 
   4   0  -3    1.06    1.75 
  -4   0   3   -0.19    1.05 
  -4   0   3   -0.18    2.00 
   3   0  -3   64.52    4.21 
   3   0  -3   52.48    2.79 
  -3   0   3   56.16    4.35 
  -3   0   3   54.69    2.76 
   2   0  -3   16.65    2.52 
   2   0  -3   12.40    1.79 
  -2   0   3   18.55    3.10 
  -2   0   3    9.41    1.46 
   1   0  -3  128.75    4.86 
   1   0  -3  123.76    4.38 
  -1   0   3  131.91    3.93 
  -1   0   3  122.62    5.41 
   0   0  -3  303.52    7.79 
   0   0  -3  315.82    8.03 
   0   0   3  322.45    8.81 
   0   0   3  311.45    7.63 
  -1   0  -3    6.44    1.54 
   1   0   3    3.38    1.14 
   1   0   3    7.87    1.90 
  -2   0  -3  405.01    9.68 
   2   0   3  389.76    9.91 
   2   0   3  386.71   10.41 
  -3   0  -3    5.83    1.37 
   3   0   3    6.22    1.69 
   3   0   3    6.16    1.72 
   3   0   3    7.13    1.23 
  -4   0  -3   16.12    1.67 
   4   0   3   15.63    1.97 
   4   0   3   13.06    2.04 
   4   0   3   14.13    2.35 
  -5   0  -3  784.66   17.72 
   5   0   3  815.84   19.29 
   5   0   3  811.22   20.33 
  -6   0  -3    9.83    1.53 
   6   0   3   12.07    2.47 
   6   0   3    6.37    2.11 
  -7   0  -3  175.07    5.19 
   7   0   3  172.85    7.46 
   7   0   3  166.54    7.78 
  -8   0  -3   26.28    3.95 
  -8   0  -3   25.87    2.01 
   8   0   3   24.57    3.73 
   8   0   3   27.58    3.77 
  -9   0  -3   15.43    3.92 
  -9   0  -3   14.93    1.92 
   9   0   3   17.88    4.08 
   9   0   3   18.79    3.91 
 -10   0  -3   84.71    6.87 
  10   0   3   90.14    6.87 
  10   0   3   92.05    6.91 
 -11   0  -3   -0.86    2.95 
  11   0   3    1.29    2.45 
  11   0   3   -1.28    2.28 
 -12   0  -3   -0.79    2.89 
  12   0   3    3.66    3.17 
  12   0   3   -2.10    2.19 
 -13   0  -3    1.39    3.33 
  13   0   3    1.85    3.35 
  13   0   3    0.57    2.76 
 -14   0  -3   -1.39    3.34 
  14   0   3    0.11    2.96 
  14   0   3    5.78    3.90 
  12  -1  -3    7.98    4.33 
 -12   1   3    2.01    2.84 
  11  -1  -3   -1.01    2.60 
 -11   1   3   -3.40    2.23 
  10  -1  -3   -0.44    2.70 
 -10   1   3    2.14    2.55 
   9  -1  -3   28.61    5.54 
  -9   1   3   31.04    4.60 
   8  -1  -3  117.51    3.88 
   8  -1  -3  110.14    8.09 
  -8   1   3  113.08    6.41 
   7  -1  -3   61.05    5.75 
   7  -1  -3   65.87    2.83 
  -7   1   3   60.97    4.67 
   6  -1  -3  176.26    5.25 
   6  -1  -3  173.51    8.91 
  -6   1   3  174.04    6.88 
   5  -1  -3    0.06    0.91 
   5  -1  -3    4.49    2.21 
  -5   1   3   -0.08    1.50 
   4  -1  -3   14.81    2.95 
   4  -1  -3   12.15    1.65 
  -4   1   3   13.30    2.08 
   3  -1  -3  192.29    7.39 
   3  -1  -3  201.16    5.63 
  -3   1   3  193.33    7.43 
  -3   1   3  193.92    6.14 
   2  -1  -3   30.07    2.87 
   2  -1  -3   33.10    2.18 
  -2   1   3   32.09    3.31 
  -2   1   3   34.40    2.32 
   1  -1  -3  209.36    6.58 
   1  -1  -3  208.36    5.92 
  -1   1   3  215.43    6.77 
  -1   1   3  211.65    5.89 
   0  -1  -3   28.51    2.11 
   0  -1  -3   27.81    2.21 
   0   1   3   29.36    1.94 
   0   1   3   26.29    2.68 
  -1  -1  -3   16.64    1.85 
  -1  -1  -3   19.33    1.57 
   1   1   3   17.85    1.85 
   1   1   3   18.97    2.23 
   2   1   3  259.71    7.23 
   2   1   3  247.50    7.04 
   3   1   3    1.30    1.10 
   3   1   3    0.06    1.29 
   3   1   3    1.98    1.35 
   4   1   3   47.26    3.37 
   4   1   3   54.88    3.12 
   4   1   3   54.63    3.23 
   5   1   3    6.47    2.19 
   5   1   3    6.80    1.95 
   5   1   3    2.25    1.55 
   6   1   3    6.10    2.18 
   6   1   3   10.79    2.51 
   7   1   3   75.80    5.01 
   7   1   3   68.79    5.02 
   8   1   3    1.15    2.27 
   8   1   3   -0.86    2.08 
  -9  -1  -3  145.73    7.94 
   9   1   3  148.49    8.27 
   9   1   3  164.62    8.54 
 -10  -1  -3   20.91    4.83 
  10   1   3   27.52    5.04 
  10   1   3   25.57    4.87 
 -11  -1  -3    7.65    3.49 
  11   1   3    6.01    3.41 
  11   1   3    9.79    3.43 
 -12  -1  -3    7.66    3.59 
  12   1   3    2.92    3.23 
  12   1   3    9.40    3.49 
 -13  -1  -3    3.63    3.66 
  13   1   3    4.62    3.23 
  13   1   3    1.10    2.93 
 -14  -1  -3   36.94    6.31 
  14   1   3   40.13    6.33 
  14   1   3   31.07    6.56 
  12  -2  -3    4.79    3.94 
 -12   2   3    5.01    3.34 
  11  -2  -3    1.07    3.81 
 -11   2   3    2.70    2.85 
  10  -2  -3   11.35    4.15 
 -10   2   3    7.80    3.01 
   9  -2  -3   13.52    4.08 
  -9   2   3   12.67    3.52 
   8  -2  -3    1.67    2.72 
  -8   2   3    6.19    3.05 
   7  -2  -3    5.00    0.98 
   7  -2  -3    4.61    2.64 
  -7   2   3    7.93    2.81 
   6  -2  -3   18.70    3.80 
   6  -2  -3   16.60    1.58 
  -6   2   3   17.33    3.04 
   5  -2  -3   20.83    3.79 
   5  -2  -3   21.19    1.72 
  -5   2   3   22.21    2.88 
   4  -2  -3    2.94    2.08 
   4  -2  -3    8.73    1.40 
  -4   2   3    5.24    1.73 
   3  -2  -3    6.62    1.39 
   3  -2  -3    8.86    2.36 
  -3   2   3    9.46    1.93 
   2  -2  -3   34.33    3.13 
   2  -2  -3   33.99    2.19 
  -2   2   3   36.20    2.49 
  -2   2   3   30.37    2.92 
   1  -2  -3  255.73    7.75 
  -1   2   3  255.22    7.14 
  -1   2   3  265.15    7.33 
   0  -2  -3   24.03    2.53 
   0   2   3   28.88    2.18 
   0   2   3   28.76    2.28 
  -1  -2  -3   49.69    2.94 
   1   2   3   45.44    2.56 
   1   2   3   47.16    2.40 
   2   2   3  114.22    3.95 
   2   2   3  108.88    4.16 
   2   2   3  122.63    4.19 
   3   2   3   64.15    3.24 
   3   2   3   73.34    3.33 
   3   2   3   64.23    3.08 
   3   2   3   71.20    3.47 
   4   2   3   -0.18    1.37 
   4   2   3    1.15    1.33 
   4   2   3    4.16    1.41 
   4   2   3    3.95    1.58 
   5   2   3    1.13    1.50 
   5   2   3   -1.33    1.39 
   5   2   3    1.80    1.10 
   5   2   3   -1.29    1.17 
   6   2   3   -0.07    1.60 
   6   2   3    1.51    1.26 
   6   2   3    2.39    1.66 
   7   2   3    1.28    1.84 
   7   2   3    2.08    2.03 
   7   2   3   -1.10    1.03 
   8   2   3    4.30    2.53 
   8   2   3    5.34    2.68 
   8   2   3    5.28    1.60 
   9   2   3   26.35    4.67 
   9   2   3   28.84    2.60 
   9   2   3   26.21    4.25 
 -10  -2  -3   29.25    5.02 
  10   2   3   29.16    4.61 
  10   2   3   32.31    5.36 
 -11  -2  -3    0.15    2.87 
  11   2   3   -0.98    2.32 
  11   2   3    4.44    2.68 
 -12  -2  -3   12.78    4.16 
  12   2   3   14.62    4.24 
  12   2   3   15.06    4.68 
 -13  -2  -3    5.26    3.52 
  13   2   3   -0.45    2.90 
  13   2   3    5.39    3.69 
 -14  -2  -3    7.36    3.93 
  14   2   3   12.60    4.24 
  12  -3  -3   14.78    5.25 
 -12   3   3   26.55    5.15 
  11  -3  -3    1.47    3.22 
 -11   3   3    8.73    3.75 
  10  -3  -3   -2.51    2.24 
 -10   3   3   -0.05    2.50 
   9  -3  -3   -0.66    2.60 
  -9   3   3    0.01    2.49 
   8  -3  -3   -0.90    2.56 
  -8   3   3    5.23    3.07 
   7  -3  -3   12.00    3.70 
   7  -3  -3   11.18    1.05 
  -7   3   3   11.41    3.06 
   6  -3  -3    1.90    2.49 
   6  -3  -3    5.19    1.14 
  -6   3   3    4.40    2.34 
   5  -3  -3    6.24    1.30 
   5  -3  -3   11.67    3.08 
  -5   3   3    9.11    2.48 
   4  -3  -3   42.22    3.91 
   4  -3  -3   37.58    2.11 
  -4   3   3   35.23    3.16 
   3  -3  -3    2.39    1.03 
   3  -3  -3    6.47    2.14 
  -3   3   3    5.44    1.69 
   2  -3  -3  102.30    5.04 
  -2   3   3  110.95    4.47 
   1  -3  -3  102.38    4.54 
  -1   3   3   92.08    3.94 
  -1   3   3  100.34    3.68 
   0  -3  -3   93.98    4.25 
   0   3   3  106.31    3.95 
   0   3   3  108.62    4.03 
   0   3   3   98.27    2.98 
  -1  -3  -3   22.74    2.68 
   1   3   3   23.78    2.04 
   1   3   3   27.53    2.21 
   1   3   3   23.38    1.39 
   2   3   3    8.65    1.40 
   2   3   3    4.03    1.35 
   2   3   3    6.28    1.46 
   3   3   3    1.49    1.30 
   3   3   3    1.58    1.36 
   3   3   3    1.58    1.21 
   3   3   3    1.69    1.24 
   4   3   3  218.32    7.16 
   4   3   3  232.41    7.85 
   4   3   3  241.40    7.64 
   4   3   3  238.09    7.17 
   5   3   3    3.33    1.77 
   5   3   3    2.69    1.58 
   5   3   3    1.99    1.70 
   5   3   3    2.37    1.32 
   6   3   3   31.88    2.99 
   6   3   3   34.36    3.52 
   6   3   3   32.02    3.28 
   6   3   3   28.23    2.48 
   7   3   3   21.76    3.40 
   7   3   3   23.96    2.45 
   7   3   3   27.46    3.54 
   8   3   3    7.49    2.03 
   8   3   3    0.66    2.23 
   8   3   3    3.79    2.50 
   9   3   3   28.84    5.13 
   9   3   3   32.20    4.55 
   9   3   3   32.96    3.06 
 -10  -3  -3   28.89    4.45 
  10   3   3   27.17    2.86 
  10   3   3   28.89    5.09 
  10   3   3   26.82    5.18 
 -11  -3  -3    9.98    3.65 
  11   3   3    2.67    3.17 
  11   3   3   -0.94    1.27 
  11   3   3    2.43    2.79 
 -12  -3  -3    6.65    3.55 
  12   3   3   -3.74    2.84 
  12   3   3    1.75    3.25 
 -13  -3  -3    6.82    3.45 
  13   3   3   15.39    4.79 
 -14  -3  -3   27.27    5.58 
  14   3   3   25.08    6.02 
  12  -4  -3    4.88    3.86 
 -12   4   3    5.19    3.59 
  11  -4  -3   -1.64    3.11 
 -11   4   3    4.84    3.13 
  10  -4  -3   18.17    5.05 
 -10   4   3   11.41    3.84 
   9  -4  -3   33.90    5.28 
  -9   4   3   47.45    5.25 
   8  -4  -3    1.74    2.84 
  -8   4   3   10.56    3.48 
   7  -4  -3   46.22    5.30 
  -7   4   3   35.50    4.43 
   6  -4  -3   -2.17    1.92 
   6  -4  -3    1.89    0.96 
  -6   4   3    1.15    2.18 
   5  -4  -3   42.36    2.25 
   5  -4  -3   25.38    3.89 
  -5   4   3   37.34    3.87 
   4  -4  -3  137.75    6.94 
   4  -4  -3  136.05    4.32 
  -4   4   3  139.79    6.06 
   3  -4  -3   76.14    4.80 
  -3   4   3   77.63    4.23 
   2  -4  -3    9.13    2.41 
  -2   4   3   12.39    1.61 
  -2   4   3   10.59    1.95 
   1  -4  -3   17.25    2.73 
  -1   4   3   14.04    1.87 
  -1   4   3   13.85    1.84 
   0  -4  -3   49.27    3.53 
   0   4   3   56.82    3.02 
   0   4   3   58.46    3.12 
  -1  -4  -3   18.21    2.67 
   1   4   3   21.64    2.18 
   1   4   3   14.83    1.94 
  -2  -4  -3  225.15    7.88 
   2   4   3  224.74    6.73 
   2   4   3  221.37    6.99 
   2   4   3  228.20    5.86 
   3   4   3   73.32    3.51 
   3   4   3   74.88    3.32 
   3   4   3   66.50    3.56 
   4   4   3  120.48    4.93 
   4   4   3  121.96    4.98 
   4   4   3  124.24    4.92 
   4   4   3  117.40    5.60 
   5   4   3    0.07    1.10 
   5   4   3   -0.82    1.47 
   5   4   3   -0.33    1.21 
   5   4   3    1.58    1.48 
   6   4   3   15.57    3.00 
   6   4   3   19.47    3.17 
   6   4   3   16.10    2.50 
   6   4   3   17.23    2.44 
   7   4   3   36.70    3.09 
   7   4   3   39.69    4.17 
   7   4   3   36.58    3.35 
   7   4   3   39.74    4.15 
   8   4   3   39.43    4.54 
   8   4   3   49.56    3.52 
   8   4   3   42.74    4.68 
   9   4   3   -1.61    2.19 
   9   4   3    3.35    3.04 
   9   4   3   -0.01    1.51 
  10   4   3   50.70    5.53 
  10   4   3   53.83    5.95 
  10   4   3   51.29    3.92 
 -11  -4  -3   19.24    4.17 
  11   4   3    9.02    2.53 
  11   4   3   15.02    4.11 
 -12  -4  -3    1.53    3.28 
  12   4   3   -4.65    2.08 
 -13  -4  -3    9.12    3.90 
  13   4   3   -0.38    2.86 
  12  -5  -3   10.00    4.77 
 -12   5   3    8.16    3.91 
  11  -5  -3    6.07    4.06 
 -11   5   3    8.41    3.70 
  10  -5  -3   15.37    4.63 
 -10   5   3   19.51    4.34 
   9  -5  -3   15.35    4.33 
  -9   5   3   17.15    4.05 
   8  -5  -3    5.49    3.39 
  -8   5   3   -0.85    2.51 
   7  -5  -3   -2.56    2.44 
  -7   5   3   -1.11    2.32 
   6  -5  -3   -0.83    1.97 
   6  -5  -3   -1.23    2.29 
   6  -5  -3   -3.13    1.02 
  -6   5   3    1.24    2.49 
   5  -5  -3  211.60    9.54 
   5  -5  -3  203.92    5.78 
   5  -5  -3  204.10    8.04 
  -5   5   3  195.23    8.20 
   4  -5  -3  118.35    5.29 
   4  -5  -3  100.38    6.18 
  -4   5   3  111.45    5.67 
   3  -5  -3   20.51    2.24 
   3  -5  -3   11.89    2.87 
  -3   5   3   11.31    2.30 
  -3   5   3   18.89    1.88 
   2  -5  -3    7.20    2.48 
  -2   5   3    4.74    1.58 
  -2   5   3    6.65    1.54 
   1  -5  -3   60.61    4.13 
  -1   5   3   59.01    3.19 
  -1   5   3   56.99    3.36 
   0  -5  -3  102.07    5.28 
   0   5   3  103.69    4.35 
   0   5   3  103.23    4.39 
  -1  -5  -3  150.87    6.49 
   1   5   3  148.93    5.38 
   1   5   3  154.83    5.62 
  -2  -5  -3    1.04    1.99 
   2   5   3    0.68    1.22 
   2   5   3    1.52    1.14 
   3   5   3    2.00    1.34 
   3   5   3    3.33    1.51 
   4   5   3   45.37    3.25 
   4   5   3   43.05    2.88 
   5   5   3    0.32    1.22 
   5   5   3    0.38    1.54 
   5   5   3    0.25    1.55 
   5   5   3    3.34    1.53 
   6   5   3   17.14    3.32 
   6   5   3   11.73    2.43 
   6   5   3   11.71    3.04 
   6   5   3   12.97    2.33 
   7   5   3    0.50    1.48 
   7   5   3    1.65    1.87 
   7   5   3    5.38    2.69 
   8   5   3   20.82    3.11 
   8   5   3   17.71    3.79 
   9   5   3    3.61    2.66 
   9   5   3   -0.05    1.53 
  10   5   3    8.57    2.35 
  10   5   3    3.94    2.88 
 -11  -5  -3    8.45    3.15 
  11   5   3    7.50    3.60 
  11   5   3    6.73    2.26 
 -12  -5  -3   -0.29    2.99 
  12   5   3    6.91    3.68 
 -13  -5  -3    0.23    3.18 
  13   5   3    2.07    2.92 
  12  -6  -3   24.50    6.30 
 -12   6   3   21.70    5.10 
  11  -6  -3   -3.92    2.87 
 -11   6   3   -1.63    2.91 
  10  -6  -3    0.49    3.06 
 -10   6   3   13.64    4.13 
   9  -6  -3   -0.32    2.90 
  -9   6   3    4.38    2.82 
   8  -6  -3    0.58    2.64 
  -8   6   3    0.08    2.58 
   7  -6  -3   25.15    4.89 
   7  -6  -3   22.95    4.20 
  -7   6   3   14.19    3.85 
   6  -6  -3    5.17    1.45 
   6  -6  -3   11.24    3.01 
   6  -6  -3   12.02    3.65 
  -6   6   3    5.99    3.00 
   5  -6  -3   11.70    3.52 
   5  -6  -3    6.24    2.48 
  -5   6   3    5.57    2.63 
   4  -6  -3   65.65    4.02 
   4  -6  -3   59.94    5.11 
  -4   6   3   67.60    4.69 
  -4   6   3   71.23    3.41 
   3  -6  -3    3.89    2.33 
   3  -6  -3    1.38    1.37 
  -3   6   3    4.87    1.51 
  -3   6   3    2.08    1.73 
   2  -6  -3   85.23    5.50 
   2  -6  -3   87.59    3.48 
  -2   6   3   93.42    4.15 
  -2   6   3   92.00    4.68 
   1  -6  -3   -2.08    1.77 
  -1   6   3    0.94    1.17 
  -1   6   3   -0.39    1.25 
   0  -6  -3   67.23    4.68 
   0   6   3   60.08    3.53 
   0   6   3   64.02    3.53 
  -1  -6  -3    2.29    2.11 
   1   6   3    2.67    1.36 
   1   6   3    3.55    1.44 
  -2  -6  -3   -1.77    2.10 
  -2  -6  -3    1.34    1.20 
   2   6   3   -0.82    0.97 
   2   6   3    1.10    1.30 
  -3  -6  -3   19.37    2.53 
   3   6   3   16.92    2.30 
   3   6   3   24.11    2.36 
   4   6   3   57.66    3.39 
   4   6   3   53.34    3.68 
   5   6   3    0.92    2.08 
   5   6   3   -0.40    1.52 
   5   6   3    4.40    1.61 
   6   6   3   19.03    2.84 
   6   6   3   21.24    2.55 
   6   6   3   22.60    3.73 
   7   6   3   49.15    4.03 
   7   6   3   54.28    3.98 
   7   6   3   54.42    5.28 
   8   6   3   29.91    3.40 
   8   6   3   18.57    3.12 
   8   6   3   21.32    4.45 
   9   6   3    1.65    1.66 
   9   6   3   -1.12    2.12 
  10   6   3    1.68    1.64 
  10   6   3    1.37    2.47 
 -11  -6  -3    0.67    2.52 
  11   6   3   -1.58    1.65 
  11   6   3   -3.59    2.11 
 -12  -6  -3   12.60    3.95 
  12   6   3   23.31    3.73 
  12   6   3   23.99    5.52 
  13   6   3   -2.38    3.04 
  11  -7  -3    2.45    3.37 
 -11   7   3   -0.17    2.80 
  10  -7  -3   -1.55    3.14 
 -10   7   3   -0.58    2.94 
   9  -7  -3   43.03    6.20 
  -9   7   3   35.76    5.32 
   8  -7  -3    2.04    2.66 
   8  -7  -3   -0.23    2.33 
  -8   7   3    0.53    2.66 
   7  -7  -3   33.11    4.23 
   7  -7  -3   36.05    5.29 
  -7   7   3   23.71    4.19 
   6  -7  -3    1.14    3.20 
   6  -7  -3    0.15    2.09 
  -6   7   3   -1.50    2.05 
   5  -7  -3   35.48    3.56 
   5  -7  -3   15.55    4.16 
  -5   7   3   25.27    4.22 
  -5   7   3   26.35    2.37 
   4  -7  -3  322.12    9.79 
   4  -7  -3  331.14   12.42 
  -4   7   3  304.43   11.05 
  -4   7   3  315.84    9.19 
   3  -7  -3    4.05    2.46 
   3  -7  -3    0.47    1.25 
  -3   7   3    1.18    1.51 
  -3   7   3    3.14    1.50 
   2  -7  -3   52.82    4.91 
   2  -7  -3   53.59    2.60 
  -2   7   3   52.19    3.37 
  -2   7   3   52.96    3.91 
   1  -7  -3    4.82    2.58 
   1  -7  -3    4.95    0.89 
  -1   7   3    4.89    1.65 
  -1   7   3    7.12    2.07 
   0  -7  -3   10.49    3.03 
   0   7   3    7.79    1.91 
   0   7   3   10.44    2.09 
  -1  -7  -3   51.81    4.65 
   1   7   3   52.49    3.59 
   1   7   3   42.86    3.11 
  -2  -7  -3   58.17    2.96 
  -2  -7  -3   55.00    5.01 
   2   7   3   57.86    3.43 
   2   7   3   53.01    3.70 
  -3  -7  -3   13.46    2.47 
   3   7   3   14.47    2.08 
   3   7   3   11.43    2.44 
  -4  -7  -3   24.35    3.44 
   4   7   3   26.24    2.94 
   4   7   3   33.56    2.77 
  -5  -7  -3   -1.63    2.34 
   5   7   3    0.86    1.57 
   5   7   3    2.64    1.74 
   6   7   3   16.91    2.65 
   6   7   3    9.61    2.56 
   6   7   3   14.01    3.76 
   7   7   3   10.16    3.51 
   7   7   3   18.12    3.16 
   7   7   3   11.55    2.86 
   8   7   3    5.76    2.16 
   8   7   3    6.06    2.36 
   8   7   3    2.52    2.87 
   9   7   3    7.19    2.17 
   9   7   3   15.66    4.35 
  10   7   3    1.24    2.71 
  10   7   3    2.08    2.13 
 -11  -7  -3   42.90    4.85 
  11   7   3   41.91    4.26 
  11   7   3   35.29    5.79 
  12   7   3   -1.76    2.63 
  12   7   3   -1.70    1.82 
  11  -8  -3   21.67    5.95 
 -11   8   3   13.14    4.34 
  10  -8  -3    5.51    3.65 
 -10   8   3    0.83    2.77 
   9  -8  -3    9.89    4.33 
  -9   8   3   13.55    4.42 
   8  -8  -3   22.93    5.21 
   8  -8  -3   20.25    4.04 
  -8   8   3   10.16    3.36 
   7  -8  -3    2.04    2.38 
   7  -8  -3    1.39    2.75 
  -7   8   3    1.81    2.61 
   6  -8  -3    1.36    3.33 
   6  -8  -3    4.98    2.52 
  -6   8   3   -1.96    2.29 
   5  -8  -3   31.35    3.50 
   5  -8  -3   24.57    4.91 
  -5   8   3   28.71    4.23 
  -5   8   3   34.26    2.94 
   4  -8  -3   28.27    4.62 
   4  -8  -3   22.42    2.73 
  -4   8   3   27.43    3.87 
  -4   8   3   27.84    2.83 
   3  -8  -3    2.34    1.35 
   3  -8  -3    2.84    2.84 
  -3   8   3   -0.97    1.73 
  -3   8   3    2.62    1.69 
   2  -8  -3   12.83    1.65 
   2  -8  -3   16.99    3.88 
  -2   8   3   16.35    2.61 
  -2   8   3   12.15    2.72 
   1  -8  -3    8.71    1.10 
   1  -8  -3    7.01    3.10 
  -1   8   3   10.12    2.25 
  -1   8   3   10.31    2.36 
   0  -8  -3   94.69    6.47 
   0   8   3   98.33    5.17 
   0   8   3  108.49    5.01 
  -1  -8  -3    9.71    1.29 
  -1  -8  -3    7.04    3.35 
   1   8   3    5.57    1.90 
   1   8   3    3.54    1.69 
  -2  -8  -3    2.03    1.55 
  -2  -8  -3    1.50    2.59 
   2   8   3    1.44    1.61 
   2   8   3    0.54    1.37 
  -3  -8  -3   19.49    4.72 
  -3  -8  -3   19.92    3.11 
   3   8   3   18.54    3.04 
   3   8   3   22.05    2.51 
  -4  -8  -3    3.36    2.28 
   4   8   3   -1.00    1.29 
   4   8   3    1.98    1.74 
  -5  -8  -3   71.76    5.42 
   5   8   3   66.49    3.99 
   5   8   3   63.41    4.64 
  -6  -8  -3    3.66    3.38 
   6   8   3    0.10    1.64 
   6   8   3    3.65    1.81 
  -7  -8  -3   26.11    5.24 
   7   8   3   24.86    3.42 
   7   8   3   19.50    3.11 
   7   8   3   25.22    5.12 
  -8  -8  -3   26.62    5.45 
   8   8   3   11.89    2.86 
   8   8   3   16.02    2.88 
   8   8   3   24.54    4.92 
  -9  -8  -3    4.81    3.79 
   9   8   3    0.44    1.75 
   9   8   3    2.06    2.23 
 -10  -8  -3   12.37    4.85 
  10   8   3    0.01    2.39 
  10   8   3    2.71    2.11 
 -11  -8  -3   16.39    5.81 
  11   8   3    9.90    3.09 
  11   8   3   21.71    5.27 
 -12  -8  -3    3.78    5.05 
  12   8   3   10.92    4.39 
  12   8   3    5.17    2.98 
  11  -9  -3    0.62    3.48 
 -11   9   3    1.55    3.25 
  10  -9  -3    3.23    3.48 
 -10   9   3    0.94    3.01 
   9  -9  -3    0.36    3.17 
   9  -9  -3    7.21    3.64 
  -9   9   3    2.74    3.14 
   8  -9  -3    4.74    2.81 
   8  -9  -3    3.32    3.63 
  -8   9   3    2.57    2.90 
   7  -9  -3    6.26    2.78 
   7  -9  -3    3.68    3.57 
  -7   9   3    3.27    2.65 
   6  -9  -3   -0.80    2.95 
   6  -9  -3    1.71    2.15 
  -6   9   3    4.88    1.83 
  -6   9   3    1.93    2.65 
   5  -9  -3    4.26    3.78 
   5  -9  -3   -0.02    1.87 
  -5   9   3    2.49    2.58 
  -5   9   3    1.81    1.69 
   4  -9  -3   53.57    5.77 
   4  -9  -3   53.78    3.72 
  -4   9   3   51.44    3.78 
  -4   9   3   52.40    4.94 
   3  -9  -3   -2.47    2.78 
   3  -9  -3    0.57    1.43 
  -3   9   3   -0.78    1.31 
  -3   9   3   -1.77    1.77 
   2  -9  -3    1.37    1.16 
   2  -9  -3    0.07    2.81 
  -2   9   3    1.33    2.04 
  -2   9   3    0.32    1.69 
   1  -9  -3    4.56    1.11 
   1  -9  -3    8.30    3.67 
  -1   9   3    3.77    2.17 
  -1   9   3    5.50    2.03 
   0  -9  -3    7.61    3.55 
   0   9   3    9.98    2.52 
   0   9   3   11.56    2.59 
  -1  -9  -3   85.34    6.86 
   1   9   3   80.64    4.60 
   1   9   3   89.42    5.22 
  -2  -9  -3   -3.24    3.13 
  -2  -9  -3    8.13    2.14 
   2   9   3    6.37    2.00 
   2   9   3    8.51    2.43 
  -3  -9  -3    6.88    2.73 
  -3  -9  -3    1.76    3.62 
   3   9   3    7.68    2.40 
   3   9   3    9.66    2.25 
  -4  -9  -3   49.11    4.51 
   4   9   3   42.79    3.98 
   4   9   3   35.40    3.24 
  -5  -9  -3   28.07    4.45 
   5   9   3   27.26    3.68 
   5   9   3   33.13    3.18 
  -6  -9  -3   45.57    5.41 
   6   9   3   52.21    4.61 
   6   9   3   48.68    3.72 
  -7  -9  -3   -0.68    2.77 
   7   9   3    1.60    1.86 
   7   9   3    1.98    1.78 
  -8  -9  -3    2.13    3.53 
   8   9   3    1.42    1.70 
   8   9   3    5.99    2.59 
  -9  -9  -3   17.30    5.38 
   9   9   3   16.21    3.43 
   9   9   3   20.19    5.01 
 -10  -9  -3   -2.56    3.88 
  10   9   3    5.70    3.54 
  10   9   3    0.42    1.98 
 -11  -9  -3   -0.10    4.15 
  11   9   3   -2.05    1.99 
  11   9   3   -1.01    2.72 
  10 -10  -3   15.43    4.86 
 -10  10   3    6.80    3.67 
   9 -10  -3   12.67    4.03 
   9 -10  -3    5.22    3.64 
  -9  10   3    1.45    2.77 
   8 -10  -3    2.81    3.02 
   8 -10  -3    5.95    4.21 
  -8  10   3    6.27    3.28 
   7 -10  -3   41.17    6.44 
   7 -10  -3   46.69    4.76 
  -7  10   3   50.92    5.63 
   6 -10  -3   -4.38    2.26 
   6 -10  -3    0.37    2.09 
  -6  10   3   -2.04    1.53 
  -6  10   3   -2.89    1.78 
   5 -10  -3    3.69    1.93 
   5 -10  -3    2.24    3.07 
  -5  10   3   -1.25    1.42 
  -5  10   3    0.75    2.32 
   4 -10  -3   30.52    5.39 
   4 -10  -3   33.08    3.09 
  -4  10   3   33.56    3.38 
  -4  10   3   41.97    4.58 
   3 -10  -3   -0.38    1.36 
   3 -10  -3    1.02    3.36 
  -3  10   3   -1.12    2.12 
  -3  10   3   -1.55    1.50 
   2 -10  -3   15.01    1.96 
   2 -10  -3   17.84    4.71 
  -2  10   3   17.52    3.17 
  -2  10   3   19.36    3.48 
   1 -10  -3   -1.20    3.27 
  -1  10   3    0.58    1.93 
  -1  10   3   -0.78    1.90 
   0 -10  -3    2.25    3.44 
   0  10   3    4.77    2.18 
   0  10   3    6.18    2.39 
  -1 -10  -3   37.31    2.36 
  -1 -10  -3   37.52    5.91 
   1  10   3   45.04    3.75 
   1  10   3   38.65    4.01 
  -2 -10  -3   39.69    3.27 
  -2 -10  -3   48.53    6.30 
   2  10   3   48.97    4.29 
   2  10   3   48.47    3.87 
  -3 -10  -3   -1.86    3.79 
  -3 -10  -3    2.61    2.43 
   3  10   3    0.00    1.74 
   3  10   3   -0.44    1.53 
  -4 -10  -3   -0.39    3.99 
  -4 -10  -3    3.94    3.20 
   4  10   3   -3.69    1.15 
   4  10   3    1.04    1.66 
  -5 -10  -3   14.40    3.69 
   5  10   3    8.42    2.10 
   5  10   3    5.93    2.53 
  -6 -10  -3   12.30    3.81 
   6  10   3   12.69    3.36 
   6  10   3   15.93    2.85 
  -7 -10  -3    1.44    2.97 
   7  10   3    0.45    2.03 
   7  10   3   -1.49    1.49 
  -8 -10  -3   -2.97    2.88 
   8  10   3    1.63    2.23 
  -9 -10  -3    2.84    3.74 
   9  10   3   -0.29    1.90 
 -10 -10  -3   11.44    5.01 
  10  10   3    4.85    2.58 
 -11 -10  -3    5.24    4.94 
  11  10   3    7.81    4.80 
  11  10   3    3.86    2.65 
   9 -11  -3   -1.17    3.04 
   9 -11  -3    2.01    3.12 
  -9  11   3   -6.02    2.23 
   8 -11  -3   -3.67    2.34 
   8 -11  -3    1.97    3.96 
  -8  11   3    0.56    2.60 
   7 -11  -3   11.74    4.88 
   7 -11  -3   13.29    3.98 
  -7  11   3    9.37    3.68 
   6 -11  -3   20.73    5.02 
  -6  11   3    6.65    3.04 
  -6  11   3   14.86    2.88 
   5 -11  -3   -3.62    2.54 
  -5  11   3    1.18    1.83 
  -5  11   3    5.23    2.78 
   4 -11  -3    4.30    3.53 
  -4  11   3   12.94    3.33 
  -4  11   3    6.96    2.37 
   3 -11  -3    1.41    3.06 
  -3  11   3    5.77    2.78 
  -3  11   3    5.97    2.28 
   2 -11  -3    9.58    4.01 
  -2  11   3    8.22    2.61 
  -2  11   3    8.04    2.74 
   1 -11  -3    1.72    3.68 
  -1  11   3    0.05    1.89 
  -1  11   3    0.26    2.05 
   0 -11  -3   -5.86    3.12 
   0  11   3    1.22    2.11 
   0  11   3    1.34    1.94 
  -1 -11  -3   15.77    5.15 
   1  11   3   24.06    3.14 
   1  11   3   19.46    3.75 
  -2 -11  -3    7.74    4.43 
   2  11   3    6.28    2.62 
   2  11   3    6.40    2.18 
  -3 -11  -3    2.49    2.58 
  -3 -11  -3    3.48    4.14 
   3  11   3    1.50    1.79 
   3  11   3   -1.04    1.43 
  -4 -11  -3    2.36    3.96 
  -4 -11  -3    1.79    2.87 
   4  11   3   -1.04    1.34 
   4  11   3    0.84    1.85 
  -5 -11  -3    1.06    2.80 
   5  11   3    3.76    1.88 
   5  11   3    3.80    2.24 
  -6 -11  -3   28.37    4.88 
   6  11   3   37.10    3.45 
   6  11   3   33.80    4.29 
  -7 -11  -3   -3.54    3.28 
   7  11   3    0.71    2.23 
  -8 -11  -3    3.86    4.04 
   8  11   3   11.65    3.47 
  -9 -11  -3    4.79    4.04 
   9  11   3    1.01    2.32 
 -10 -11  -3    2.92    4.10 
  10  11   3   -2.01    1.78 
   8 -12  -3   -1.85    3.78 
  -8  12   3   -0.07    2.62 
   7 -12  -3   -1.10    3.54 
  -7  12   3   -3.20    2.34 
   6 -12  -3   36.56    6.88 
  -6  12   3   20.05    3.35 
  -6  12   3   29.25    5.00 
   5 -12  -3    1.30    3.33 
  -5  12   3    4.86    3.14 
  -5  12   3   10.29    2.70 
   4 -12  -3   -1.64    2.77 
  -4  12   3   -0.08    2.30 
  -4  12   3    0.73    1.80 
   3 -12  -3   -3.33    3.16 
  -3  12   3   -1.43    1.72 
  -3  12   3    0.34    2.06 
   2 -12  -3    0.29    3.21 
  -2  12   3   -0.68    2.00 
  -2  12   3   -2.03    1.61 
   1 -12  -3   10.41    4.00 
  -1  12   3   11.77    3.14 
  -1  12   3    5.51    2.39 
   0 -12  -3    2.71    3.45 
   0  12   3   10.19    3.00 
   0  12   3    6.50    2.37 
  -1 -12  -3    2.31    3.84 
   1  12   3    3.41    1.84 
   1  12   3    0.94    1.90 
  -2 -12  -3   -0.60    3.60 
   2  12   3    8.10    2.30 
   2  12   3    4.33    2.33 
  -3 -12  -3   11.58    4.69 
   3  12   3   13.34    2.64 
   3  12   3    6.52    2.53 
  -4 -12  -3   17.91    5.52 
   4  12   3   14.65    2.80 
   4  12   3    9.85    2.88 
  -5 -12  -3   17.87    6.04 
   5  12   3   20.92    2.89 
   5  12   3   18.89    3.78 
   6  12   3    0.89    2.22 
  -7 -12  -3    1.29    3.80 
   7  12   3    1.83    2.49 
  -8 -12  -3    3.65    3.91 
   8  12   3    2.69    2.59 
  -9 -12  -3   -0.13    4.07 
   9  12   3    4.66    2.82 
   7 -13  -3    9.35    4.97 
  -7  13   3    9.34    3.76 
   6 -13  -3    3.17    3.76 
  -6  13   3   -0.14    2.04 
  -6  13   3    3.35    2.95 
   5 -13  -3    2.46    3.83 
  -5  13   3   -0.46    2.29 
  -5  13   3   -0.42    2.01 
   4 -13  -3   16.53    5.41 
  -4  13   3    7.98    3.02 
  -4  13   3   11.06    3.04 
   3 -13  -3    5.30    3.66 
  -3  13   3    2.23    1.80 
  -3  13   3    1.19    2.44 
   2 -13  -3   29.07    5.83 
  -2  13   3   27.84    4.06 
  -2  13   3   32.65    4.20 
   1 -13  -3    4.33    3.65 
  -1  13   3    9.33    3.13 
  -1  13   3   12.32    3.03 
   0 -13  -3   -1.10    3.20 
   0  13   3    0.83    1.79 
   0  13   3    2.66    2.22 
  -1 -13  -3   19.66    5.58 
   1  13   3   10.24    2.71 
   1  13   3   15.20    3.65 
  -2 -13  -3    0.23    3.68 
   2  13   3    1.32    2.13 
   2  13   3    1.49    1.79 
  -3 -13  -3    8.27    4.88 
   3  13   3    6.49    2.06 
   3  13   3    6.41    2.72 
  -4 -13  -3   17.21    5.83 
   4  13   3    7.06    2.79 
   4  13   3   10.96    2.67 
  -5 -13  -3    4.89    5.00 
   5  13   3   -1.49    1.87 
  -6 -13  -3    7.86    5.26 
   6  13   3   -1.06    2.03 
   7  13   3    2.09    2.83 
   8  13   3   -0.85    2.10 
   6 -14  -3    2.20    4.11 
  -6  14   3    3.14    2.93 
   5 -14  -3    2.87    3.85 
  -5  14   3    6.75    3.27 
  -5  14   3    0.76    2.18 
   4 -14  -3    0.23    3.76 
  -4  14   3    3.58    2.67 
  -4  14   3    0.50    2.04 
   3 -14  -3    5.22    3.96 
  -3  14   3   -2.35    1.78 
  -3  14   3    1.44    2.44 
   2 -14  -3   -0.57    3.45 
  -2  14   3    4.42    2.47 
  -2  14   3    1.98    2.27 
   1 -14  -3   13.16    5.10 
  -1  14   3    7.60    2.69 
  -1  14   3    8.11    3.11 
   0 -14  -3    3.74    4.02 
   0  14   3   12.57    3.56 
   0  14   3    9.86    2.90 
  -1 -14  -3   11.51    5.44 
   1  14   3   12.20    3.55 
   1  14   3   18.26    3.42 
  -2 -14  -3    1.95    3.83 
   2  14   3   -0.55    1.56 
   2  14   3    5.63    3.06 
  -3 -14  -3   10.73    5.26 
   3  14   3   10.88    3.67 
   3  14   3    9.08    2.57 
  -4 -14  -3    1.42    4.40 
   4  14   3   -0.46    2.18 
  -5 -14  -3    0.43    4.22 
   5  14   3   -1.13    1.95 
  -6 -14  -3   19.97    6.43 
   6  14   3   16.80    4.26 
   4 -15  -3    8.98    5.13 
  -4  15   3    6.55    2.87 
  -4  15   3   13.39    3.83 
   3 -15  -3    5.05    4.38 
  -3  15   3    7.59    3.20 
  -3  15   3    3.37    2.80 
   2 -15  -3    6.48    4.45 
  -2  15   3    7.08    3.09 
  -2  15   3    5.78    2.65 
   1 -15  -3   32.48    7.02 
  -1  15   3   32.44    4.76 
  -1  15   3   39.21    4.55 
   0 -15  -3   -6.84    2.84 
   0  15   3    0.31    1.88 
   0  15   3    5.28    2.93 
  -1 -15  -3   11.30    5.37 
   1  15   3    4.65    2.31 
   1  15   3    2.24    2.74 
  -2 -15  -3   -1.83    4.32 
   2  15   3    0.79    2.42 
   2  15   3    6.30    2.44 
  -3 -15  -3   10.34    5.47 
   3  15   3   10.86    4.03 
  -4 -15  -3    8.65    5.49 
   4  15   3   12.14    4.02 
   2  14  -4    0.71    2.38 
  -2 -14   4    0.07    3.69 
  -2 -14   4   -3.25    3.60 
   1  14  -4    1.44    2.82 
  -1 -14   4   15.49    5.34 
  -1 -14   4   -0.31    4.46 
   0  14  -4    3.63    3.01 
   0 -14   4   -3.00    3.43 
   0 -14   4    6.57    4.51 
  -1  14  -4    4.86    2.94 
   1 -14   4    4.36    3.87 
   1 -14   4   -0.52    4.14 
  -2  14  -4    3.54    2.77 
   2 -14   4    4.10    4.51 
   2 -14   4   -1.64    3.05 
  -3  14  -4    1.55    2.34 
   3 -14   4    1.91    3.63 
   3 -14   4    4.31    4.30 
  -4  14  -4    0.19    2.36 
  -4  14  -4    5.98    2.90 
   4 -14   4   -1.43    3.60 
   4 -14   4   -1.46    3.01 
  -5  14  -4   23.96    4.83 
  -5  14  -4   24.28    4.87 
   5 -14   4   14.20    4.69 
   5 -14   4   13.79    4.30 
   4  13  -4    2.54    3.09 
  -4 -13   4   -7.57    3.39 
   3  13  -4    8.23    3.34 
  -3 -13   4   10.16    5.15 
  -3 -13   4    7.91    4.83 
   2  13  -4   -1.07    2.59 
  -2 -13   4   -1.51    4.00 
  -2 -13   4   -8.60    2.76 
   1  13  -4    5.97    2.93 
  -1 -13   4   -0.22    3.36 
  -1 -13   4    8.94    5.19 
   0  13  -4    1.85    2.45 
   0 -13   4    5.79    4.47 
   0 -13   4    2.22    3.74 
  -1  13  -4    8.75    2.98 
   1 -13   4   17.46    4.46 
   1 -13   4   15.18    5.16 
  -2  13  -4    3.64    2.46 
   2 -13   4    0.24    2.90 
   2 -13   4    8.71    4.37 
  -3  13  -4    2.10    2.41 
  -3  13  -4    7.08    2.72 
   3 -13   4    1.97    3.25 
   3 -13   4    5.58    4.03 
  -4  13  -4    0.35    2.12 
  -4  13  -4    4.12    2.63 
   4 -13   4    3.39    4.18 
   4 -13   4    1.78    3.32 
  -5  13  -4    4.46    2.46 
  -5  13  -4    2.32    2.85 
   5 -13   4    8.41    3.92 
   5 -13   4    5.29    3.92 
  -6  13  -4   43.81    5.59 
  -6  13  -4   38.01    4.57 
   6 -13   4   45.14    5.82 
   6 -13   4   41.40    6.46 
  -7  13  -4    1.50    3.05 
  -7  13  -4   -0.25    2.28 
   7 -13   4   -1.25    3.13 
   7 -13   4   -0.64    2.90 
  -6 -12   4    6.62    4.83 
   5  12  -4   -0.55    2.22 
  -5 -12   4    4.53    4.75 
   4  12  -4   -0.01    2.12 
  -4 -12   4   -3.04    3.46 
   3  12  -4    0.73    1.96 
  -3 -12   4    1.47    3.89 
   2  12  -4    2.68    2.72 
  -2 -12   4   -0.33    3.68 
  -2 -12   4   -1.83    3.49 
   1  12  -4    6.32    2.98 
  -1 -12   4    5.84    4.80 
  -1 -12   4    7.12    4.43 
   0  12  -4    0.02    2.33 
   0 -12   4    0.23    3.58 
   0 -12   4    0.52    3.92 
  -1  12  -4    1.66    2.38 
   1 -12   4    1.92    3.51 
   1 -12   4   -2.10    2.84 
  -2  12  -4    2.88    2.60 
  -2  12  -4    1.86    1.82 
   2 -12   4    1.45    3.68 
   2 -12   4    0.81    3.01 
  -3  12  -4   12.23    3.51 
  -3  12  -4    9.93    3.09 
   3 -12   4   16.76    4.95 
   3 -12   4    7.95    3.83 
  -4  12  -4   -0.46    1.99 
  -4  12  -4    2.03    2.47 
   4 -12   4   -2.43    2.78 
   4 -12   4    0.96    3.15 
  -5  12  -4    6.64    2.40 
  -5  12  -4    6.02    3.17 
   5 -12   4   11.97    4.11 
   5 -12   4    2.03    3.42 
  -6  12  -4    3.79    3.06 
  -6  12  -4   -1.08    1.84 
   6 -12   4    1.18    3.47 
   6 -12   4    0.17    2.74 
  -7  12  -4   -1.53    1.85 
  -7  12  -4    0.09    2.82 
   7 -12   4   -2.27    2.65 
   7 -12   4    3.79    3.34 
  -8  12  -4    3.42    3.35 
   8 -12   4    3.79    3.24 
   8 -12   4    3.68    3.27 
  -9  12  -4   -1.18    3.35 
   9 -12   4    8.80    4.12 
   9 -12   4    1.73    3.51 
   7  11  -4    1.95    2.29 
  -7 -11   4   11.70    5.61 
   6  11  -4    0.15    2.08 
  -6 -11   4   -0.90    4.65 
   5  11  -4   12.74    3.50 
  -5 -11   4   10.32    5.49 
   4  11  -4    2.24    2.33 
  -4 -11   4    3.07    4.48 
   3  11  -4    2.98    2.38 
  -3 -11   4    0.84    3.34 
   2  11  -4   29.93    4.30 
  -2 -11   4   25.13    5.58 
   1  11  -4    2.43    2.31 
  -1 -11   4    0.31    3.31 
  -1 -11   4    0.87    3.71 
   0  11  -4   12.66    3.62 
   0 -11   4   17.13    4.52 
   0 -11   4   17.59    5.29 
  -1  11  -4    3.33    1.76 
  -1  11  -4    0.10    2.11 
   1 -11   4    6.62    3.70 
   1 -11   4    1.32    3.43 
  -2  11  -4    0.54    1.97 
  -2  11  -4    2.08    2.20 
   2 -11   4    1.19    3.76 
   2 -11   4   -2.29    2.79 
  -3  11  -4   15.47    3.49 
  -3  11  -4    8.38    2.81 
   3 -11   4   10.39    3.78 
   3 -11   4    6.68    3.54 
  -4  11  -4    2.15    2.50 
  -4  11  -4    2.48    2.27 
   4 -11   4   -1.35    2.77 
   4 -11   4   -1.43    2.39 
  -5  11  -4    7.67    3.21 
  -5  11  -4    4.55    2.48 
   5 -11   4    4.59    3.52 
   5 -11   4   17.57    4.34 
  -6  11  -4   16.32    3.36 
  -6  11  -4   19.75    4.57 
   6 -11   4   17.03    4.55 
   6 -11   4   14.99    3.95 
  -7  11  -4   -1.59    1.71 
  -7  11  -4    7.17    3.60 
   7 -11   4   -1.88    2.53 
   7 -11   4   -0.62    2.91 
  -8  11  -4    3.13    2.22 
  -8  11  -4    3.34    3.47 
   8 -11   4    0.43    2.75 
   8 -11   4   -0.17    2.73 
  -9  11  -4    0.30    3.07 
   9 -11   4   -0.55    3.10 
   9 -11   4   -3.54    3.08 
 -10  11  -4   -0.75    3.18 
  10 -11   4    0.97    2.79 
  10 -11   4    1.94    2.94 
   8  10  -4    1.64    3.96 
   8  10  -4   -0.84    1.69 
  -8 -10   4   -1.35    4.34 
   7  10  -4    1.70    3.43 
   7  10  -4   14.02    3.80 
  -7 -10   4    7.17    4.79 
   6  10  -4    7.51    2.80 
   6  10  -4    5.79    4.05 
  -6 -10   4    6.46    4.79 
   5  10  -4    4.48    2.71 
  -5 -10   4   -5.47    3.89 
   4  10  -4    2.24    2.11 
  -4 -10   4    5.82    4.59 
   3  10  -4    3.93    2.39 
  -3 -10   4   -2.64    3.41 
   2  10  -4    4.67    2.44 
  -2 -10   4   -1.20    3.24 
   1  10  -4    2.40    2.14 
  -1 -10   4   -3.76    2.86 
  -1 -10   4    2.14    3.66 
   0  10  -4   29.21    4.02 
   0  10  -4   27.16    2.48 
   0 -10   4   31.10    6.03 
   0 -10   4   26.50    5.45 
  -1  10  -4    1.75    2.28 
  -1  10  -4   -1.41    1.48 
   1 -10   4   -0.75    3.35 
   1 -10   4    3.01    3.29 
  -2  10  -4   47.32    4.14 
  -2  10  -4   37.93    4.25 
   2 -10   4   46.51    6.04 
   2 -10   4   42.66    5.38 
  -3  10  -4    4.39    2.48 
  -3  10  -4    3.82    2.41 
   3 -10   4   10.77    3.77 
   3 -10   4    8.43    3.36 
  -4  10  -4   -1.97    2.11 
  -4  10  -4   -1.38    1.73 
   4 -10   4    1.50    2.61 
   4 -10   4   -0.86    2.85 
  -5  10  -4   -0.96    2.54 
  -5  10  -4    2.57    2.04 
   5 -10   4   -1.32    2.40 
   5 -10   4   -0.31    2.46 
  -6  10  -4    5.21    2.30 
  -6  10  -4    1.36    2.76 
   6 -10   4    1.19    2.66 
   6 -10   4    7.97    3.52 
  -7  10  -4    6.16    3.44 
  -7  10  -4    3.52    2.09 
   7 -10   4    1.93    2.77 
   7 -10   4    1.87    3.03 
  -8  10  -4   -3.87    2.76 
  -8  10  -4    3.23    1.93 
   8 -10   4    5.13    3.06 
   8 -10   4    1.39    2.93 
  -9  10  -4    5.99    3.98 
   9 -10   4    7.91    3.77 
   9 -10   4    3.90    3.22 
 -10  10  -4   22.50    5.46 
  10 -10   4   21.22    4.91 
  10 -10   4   12.17    4.49 
 -11  10  -4    6.89    4.42 
  11 -10   4   14.78    4.84 
  11 -10   4   11.33    4.07 
   9   9  -4   -1.24    2.05 
   9   9  -4    6.12    4.29 
  -9  -9   4   -0.84    5.22 
   8   9  -4    6.92    3.97 
   8   9  -4    3.68    2.53 
  -8  -9   4    6.80    4.93 
   7   9  -4    0.45    2.31 
   7   9  -4    2.61    3.44 
  -7  -9   4    6.48    4.56 
   6   9  -4   -1.32    1.83 
   6   9  -4   -0.85    3.03 
  -6  -9   4    0.32    3.92 
   5   9  -4   -0.55    1.85 
   5   9  -4    1.67    3.04 
  -5  -9   4    1.96    4.21 
   4   9  -4    0.01    1.89 
  -4  -9   4   -0.01    4.01 
   3   9  -4   -0.17    1.99 
  -3  -9   4   -3.36    2.99 
   2   9  -4    3.30    2.49 
  -2  -9   4    3.19    3.68 
   1   9  -4   11.34    3.12 
   1   9  -4   16.90    1.81 
  -1  -9   4   13.24    4.53 
   0   9  -4   12.48    3.26 
   0   9  -4    8.62    1.96 
   0  -9   4    8.43    4.18 
   0  -9   4   16.01    4.57 
  -1   9  -4   11.54    3.08 
  -1   9  -4   15.15    2.90 
   1  -9   4   17.96    4.84 
   1  -9   4   17.69    4.74 
  -2   9  -4    2.74    2.36 
  -2   9  -4    3.84    2.28 
   2  -9   4    3.08    3.18 
   2  -9   4    1.08    3.15 
  -3   9  -4   66.56    5.20 
  -3   9  -4   52.38    4.69 
   3  -9   4   54.01    5.78 
   3  -9   4   46.21    5.64 
  -4   9  -4   35.85    4.03 
  -4   9  -4   44.53    4.73 
   4  -9   4   39.80    5.15 
   4  -9   4   30.10    4.97 
  -5   9  -4   -2.35    1.61 
  -5   9  -4    5.22    2.99 
   5  -9   4    1.31    2.75 
   5  -9   4   -2.81    2.45 
  -6   9  -4    4.50    2.13 
  -6   9  -4    8.72    3.27 
   6  -9   4    7.69    3.06 
   6  -9   4   11.84    3.42 
  -7   9  -4   11.69    2.62 
  -7   9  -4    5.42    3.24 
   7  -9   4    7.80    3.53 
   7  -9   4    3.34    2.83 
  -8   9  -4   10.03    3.87 
  -8   9  -4   10.28    2.50 
   8  -9   4   10.76    3.58 
   8  -9   4   14.10    3.98 
  -9   9  -4    5.29    3.57 
   9  -9   4    0.32    2.43 
   9  -9   4    4.44    3.38 
 -10   9  -4    3.97    3.73 
  10  -9   4    4.26    3.65 
  10  -9   4    9.26    3.54 
 -11   9  -4    1.54    3.50 
  11  -9   4    7.53    3.35 
  11  -9   4    6.60    3.77 
   9   8  -4   -0.28    3.03 
   9   8  -4    1.45    2.30 
  -9  -8   4    2.32    4.81 
   8   8  -4   35.27    4.30 
   8   8  -4   20.93    5.28 
  -8  -8   4   21.41    6.36 
   7   8  -4    1.32    1.96 
   7   8  -4    2.45    3.18 
  -7  -8   4    2.61    4.75 
   6   8  -4    8.62    3.68 
   6   8  -4    5.02    2.45 
  -6  -8   4   13.04    5.17 
   5   8  -4    0.86    2.64 
   5   8  -4    0.14    1.72 
  -5  -8   4    3.87    4.09 
   4   8  -4    1.15    2.81 
   4   8  -4    7.47    2.72 
  -4  -8   4    3.76    4.43 
   3   8  -4   16.72    3.52 
  -3  -8   4   21.25    5.86 
   2   8  -4    0.98    1.89 
  -2  -8   4    3.18    4.05 
   1   8  -4   12.87    3.07 
   1   8  -4   13.90    1.65 
  -1  -8   4   15.14    4.61 
   0   8  -4   24.27    3.50 
   0   8  -4   22.78    2.44 
   0  -8   4   19.74    5.00 
  -1   8  -4    1.50    1.64 
  -1   8  -4    1.86    2.04 
   1  -8   4    4.82    3.24 
   1  -8   4    0.14    3.17 
  -2   8  -4    0.82    2.07 
  -2   8  -4    4.02    2.12 
   2  -8   4    0.22    2.79 
   2  -8   4    4.55    2.94 
  -3   8  -4    5.90    2.46 
  -3   8  -4   -0.15    2.37 
   3  -8   4    2.83    3.07 
   3  -8   4    2.19    3.07 
  -4   8  -4    0.77    1.75 
  -4   8  -4   -1.21    2.34 
   4  -8   4   -0.26    2.56 
   4  -8   4   -0.09    2.54 
  -5   8  -4    9.70    2.52 
  -5   8  -4   13.65    3.79 
   5  -8   4    9.58    3.65 
   5  -8   4    9.27    3.75 
  -6   8  -4    7.64    2.39 
  -6   8  -4   15.45    3.98 
   6  -8   4    7.12    3.06 
   6  -8   4   10.16    3.44 
  -7   8  -4   12.96    2.52 
  -7   8  -4   11.08    3.68 
   7  -8   4   16.70    4.12 
   7  -8   4   12.62    3.82 
  -8   8  -4    3.13    3.21 
  -8   8  -4    4.54    1.91 
   8  -8   4    3.60    2.93 
   8  -8   4    6.36    2.89 
  -9   8  -4    0.66    3.18 
   9  -8   4    4.16    2.94 
   9  -8   4    5.50    3.15 
 -10   8  -4    2.76    3.81 
  10  -8   4   -1.09    2.59 
  10  -8   4    2.56    2.69 
 -11   8  -4   42.31    6.50 
  11  -8   4   36.43    6.45 
  11  -8   4   23.76    5.12 
 -12   8  -4    5.20    4.41 
  12  -8   4   -0.27    2.80 
  12  -8   4    2.42    3.41 
  10   7  -4    2.66    3.40 
  10   7  -4    1.06    1.94 
 -10  -7   4   -5.25    3.96 
   9   7  -4    2.75    1.87 
   9   7  -4    4.56    3.36 
  -9  -7   4   -2.82    4.42 
   8   7  -4    1.37    1.84 
   8   7  -4    2.44    3.08 
  -8  -7   4   -7.60    3.41 
   7   7  -4   -3.31    1.89 
   7   7  -4   -0.41    1.69 
  -7  -7   4   -1.58    4.28 
   6   7  -4   -0.46    2.68 
   6   7  -4    0.03    1.76 
  -6  -7   4    1.37    3.83 
   5   7  -4    5.14    3.12 
   5   7  -4    3.03    2.15 
  -5  -7   4    0.48    3.59 
   4   7  -4   27.20    5.14 
   4   7  -4   26.42    3.67 
  -4  -7   4   22.45    5.31 
   3   7  -4   -0.28    1.89 
   3   7  -4   -1.13    2.20 
  -3  -7   4    3.11    4.16 
   2   7  -4   19.24    3.25 
  -2  -7   4   15.60    4.70 
   1   7  -4    6.79    1.21 
   1   7  -4    6.72    2.20 
  -1  -7   4    7.75    3.62 
   0   7  -4   17.54    2.25 
   0   7  -4   15.31    2.89 
   0  -7   4   18.52    4.35 
  -1   7  -4    6.76    1.91 
  -1   7  -4    8.63    2.41 
   1  -7   4    9.22    3.28 
   1  -7   4    5.53    3.34 
  -2   7  -4    7.40    2.32 
  -2   7  -4    9.78    2.48 
   2  -7   4   11.40    3.22 
   2  -7   4   10.93    3.43 
  -3   7  -4  184.12    7.69 
  -3   7  -4  201.30    7.71 
   3  -7   4  189.01    8.16 
   3  -7   4  175.29    8.57 
  -4   7  -4   20.40    2.96 
  -4   7  -4   24.46    4.07 
   4  -7   4   29.70    4.11 
   4  -7   4   33.27    4.03 
  -5   7  -4  186.91    8.67 
  -5   7  -4  180.14    7.19 
   5  -7   4  196.44    9.28 
   5  -7   4  191.06    8.42 
  -6   7  -4    4.27    2.97 
  -6   7  -4   -0.91    1.48 
   6  -7   4    1.16    2.57 
   6  -7   4    1.83    2.72 
  -7   7  -4   -0.42    3.10 
  -7   7  -4    1.84    1.70 
   7  -7   4    1.74    2.67 
   7  -7   4    1.36    2.61 
  -8   7  -4   79.40    6.89 
  -8   7  -4   95.51    4.65 
   8  -7   4   98.93    7.25 
   8  -7   4   96.03    6.51 
  -9   7  -4   18.65    4.58 
   9  -7   4   13.55    3.55 
   9  -7   4   19.01    4.64 
 -10   7  -4   12.50    4.52 
  10  -7   4    8.07    3.20 
  10  -7   4    7.99    3.75 
 -11   7  -4    3.11    3.48 
  11  -7   4   -2.21    2.49 
  11  -7   4    0.39    2.74 
 -12   7  -4    1.48    3.45 
  12  -7   4    4.33    3.23 
  12  -7   4   -0.25    2.87 
 -13   7  -4    5.24    4.03 
  13  -7   4    4.78    3.38 
  13  -7   4    2.87    3.76 
  10   6  -4    2.04    3.09 
  10   6  -4   -1.10    1.78 
 -10  -6   4    0.30    4.53 
   9   6  -4   -0.60    2.64 
   9   6  -4    3.85    2.30 
  -9  -6   4    1.53    4.55 
   8   6  -4   23.02    5.32 
   8   6  -4   23.98    3.54 
  -8  -6   4   24.34    6.12 
   7   6  -4   18.14    3.44 
   7   6  -4   18.79    4.56 
  -7  -6   4   18.56    5.37 
   6   6  -4    8.62    2.61 
   6   6  -4    9.71    3.65 
  -6  -6   4    5.07    4.54 
   5   6  -4   15.34    3.22 
   5   6  -4   11.69    3.71 
  -5  -6   4   17.50    5.29 
   4   6  -4   41.58    4.06 
   4   6  -4   32.79    4.58 
  -4  -6   4   29.49    5.53 
   3   6  -4   79.15    5.91 
   3   6  -4   66.32    4.66 
  -3  -6   4   79.94    6.76 
   2   6  -4   34.49    4.09 
   2   6  -4   21.15    3.12 
  -2  -6   4   32.54    5.72 
   1   6  -4   19.43    1.54 
   1   6  -4   15.21    2.71 
  -1  -6   4   17.87    3.96 
   0   6  -4   -0.32    1.37 
   0   6  -4    0.64    1.21 
   0  -6   4   -1.04    2.24 
  -1   6  -4   51.62    3.81 
  -1   6  -4   55.84    3.49 
   1  -6   4   54.45    4.57 
   1  -6   4   51.17    4.83 
  -2   6  -4   44.10    3.47 
  -2   6  -4   39.20    3.39 
   2  -6   4   39.58    4.38 
   2  -6   4   37.76    3.95 
  -3   6  -4   35.70    3.19 
  -3   6  -4   32.09    3.53 
   3  -6   4   36.44    4.17 
   3  -6   4   30.38    3.39 
  -4   6  -4    2.72    2.30 
  -4   6  -4    8.75    2.12 
   4  -6   4    1.88    2.23 
   4  -6   4    8.07    2.80 
  -5   6  -4   15.29    3.42 
  -5   6  -4   14.24    2.51 
   5  -6   4   15.02    3.59 
   5  -6   4   16.90    3.20 
  -6   6  -4    8.38    3.21 
  -6   6  -4    4.04    1.89 
   6  -6   4    3.19    2.56 
   6  -6   4    2.24    2.64 
  -7   6  -4   -0.60    2.68 
  -7   6  -4   -1.17    1.31 
   7  -6   4    2.88    2.63 
   7  -6   4    0.80    2.53 
  -8   6  -4   -2.25    1.28 
  -8   6  -4   -1.34    3.18 
   8  -6   4   -2.39    2.15 
   8  -6   4   -3.61    2.27 
  -9   6  -4   -2.88    2.26 
   9  -6   4    1.45    2.70 
   9  -6   4    0.82    2.30 
 -10   6  -4   35.82    6.08 
  10  -6   4   31.99    4.83 
  10  -6   4   23.48    5.09 
 -11   6  -4    7.66    4.19 
  11  -6   4    0.29    2.44 
  11  -6   4    1.08    2.81 
 -12   6  -4   11.60    4.81 
  12  -6   4   10.17    3.71 
  12  -6   4   21.38    5.35 
 -13   6  -4   10.66    4.80 
  13  -6   4    5.85    3.76 
  13  -6   4    7.29    4.38 
  11   5  -4    8.67    4.64 
 -11  -5   4    7.94    6.06 
  10   5  -4    8.92    4.31 
  10   5  -4    5.77    2.35 
 -10  -5   4   11.24    5.74 
   9   5  -4   12.21    4.41 
   9   5  -4   15.79    2.99 
  -9  -5   4    9.00    5.68 
   8   5  -4   27.92    5.41 
   8   5  -4   25.45    3.31 
  -8  -5   4   15.53    5.56 
   7   5  -4    0.44    1.94 
   7   5  -4   -1.73    2.42 
  -7  -5   4   -3.81    3.09 
   6   5  -4   11.80    2.91 
   6   5  -4    7.34    3.38 
  -6  -5   4    9.00    4.64 
   5   5  -4   -1.47    1.53 
   5   5  -4   -0.91    2.23 
  -5  -5   4   -5.16    3.30 
   4   5  -4    3.30    1.88 
   4   5  -4    2.17    2.41 
  -4  -5   4    5.90    4.15 
   3   5  -4    7.65    2.63 
   3   5  -4    3.84    1.98 
  -3  -5   4    7.23    3.50 
   2   5  -4    7.44    2.09 
   2   5  -4    6.46    2.35 
  -2  -5   4    6.73    3.54 
   1   5  -4   -0.24    1.66 
   1   5  -4   -1.20    1.26 
   1   5  -4    0.60    0.88 
  -1  -5   4    2.13    2.49 
   0   5  -4   33.62    2.40 
   0   5  -4   34.89    3.17 
   0  -5   4   37.41    4.30 
  -1   5  -4   41.33    3.01 
  -1   5  -4   36.35    3.19 
   1  -5   4   42.10    4.32 
  -2   5  -4    4.78    1.92 
  -2   5  -4    5.45    1.74 
   2  -5   4    5.38    2.49 
   2  -5   4    2.28    1.88 
  -3   5  -4   44.50    3.33 
  -3   5  -4   47.84    3.73 
   3  -5   4   39.18    3.50 
   3  -5   4   48.03    4.34 
  -4   5  -4    7.21    2.60 
  -4   5  -4    4.92    1.81 
   4  -5   4    5.34    2.11 
   4  -5   4    5.80    2.55 
  -5   5  -4    7.27    2.65 
  -5   5  -4    3.78    1.60 
   5  -5   4    2.03    2.16 
   5  -5   4    0.87    1.81 
  -6   5  -4   -1.24    2.26 
  -6   5  -4    2.03    1.42 
   6  -5   4    3.23    2.25 
   6  -5   4    1.15    2.24 
  -7   5  -4   24.67    4.57 
  -7   5  -4   17.84    2.54 
   7  -5   4    9.90    2.92 
   7  -5   4   16.38    3.83 
  -8   5  -4   -0.28    1.28 
  -8   5  -4   -4.09    2.52 
   8  -5   4   -0.49    2.15 
   8  -5   4   -3.38    2.27 
  -9   5  -4   11.16    4.10 
   9  -5   4   18.82    4.53 
   9  -5   4   23.67    4.35 
 -10   5  -4    6.41    3.39 
  10  -5   4   -0.73    2.18 
  10  -5   4    0.19    2.79 
 -11   5  -4    6.33    3.71 
  11  -5   4   15.09    3.99 
  11  -5   4    5.65    3.54 
 -12   5  -4    1.67    3.83 
  12  -5   4    0.91    3.53 
  12  -5   4    3.95    3.20 
 -13   5  -4   12.05    5.05 
  13  -5   4   10.59    4.52 
  13  -5   4   21.41    5.03 
  11   4  -4    5.86    4.12 
 -11  -4   4    2.03    4.64 
  10   4  -4    5.22    2.02 
  10   4  -4    4.97    4.07 
 -10  -4   4   -0.66    4.45 
   9   4  -4    0.30    1.68 
   9   4  -4    6.34    3.60 
  -9  -4   4    9.54    5.10 
   8   4  -4    1.98    2.93 
   8   4  -4   -0.03    1.56 
  -8  -4   4   -1.41    3.43 
   7   4  -4    6.50    3.61 
   7   4  -4    2.84    2.12 
  -7  -4   4   -0.74    4.12 
   6   4  -4    5.93    2.17 
   6   4  -4   11.93    3.66 
  -6  -4   4    8.78    4.18 
   5   4  -4   -2.54    2.07 
   5   4  -4    2.99    1.83 
  -5  -4   4    4.08    3.96 
   4   4  -4    3.40    2.21 
   4   4  -4   10.17    2.27 
  -4  -4   4    8.24    3.67 
   3   4  -4  125.04    6.61 
   3   4  -4  118.72    5.54 
  -3  -4   4  110.16    7.15 
   2   4  -4   13.57    2.72 
   2   4  -4   10.54    2.25 
  -2  -4   4   11.82    3.32 
   1   4  -4    2.00    0.93 
   1   4  -4    0.59    1.32 
   1   4  -4   -2.28    1.20 
  -1  -4   4   -2.13    2.42 
   0   4  -4    6.14    1.45 
   0   4  -4    6.87    2.03 
   0   4  -4   10.73    2.33 
   0  -4   4    8.16    2.70 
  -1   4  -4   11.49    1.99 
  -1   4  -4    9.44    2.14 
   1  -4   4    6.39    2.62 
  -2   4  -4   43.08    3.17 
  -2   4  -4   45.51    3.15 
   2  -4   4   49.84    4.23 
   2  -4   4   40.10    3.14 
  -3   4  -4    0.22    1.19 
  -3   4  -4   -0.18    1.64 
   3  -4   4    1.33    1.93 
   3  -4   4    0.22    1.41 
  -4   4  -4   19.16    2.37 
  -4   4  -4   21.08    3.33 
   4  -4   4   21.79    3.70 
   4  -4   4   16.98    2.44 
  -5   4  -4   52.37    3.21 
  -5   4  -4   47.42    4.29 
   5  -4   4   52.56    3.55 
   5  -4   4   47.46    4.31 
  -6   4  -4    4.19    1.49 
  -6   4  -4    7.57    2.85 
   6  -4   4    6.03    2.06 
   6  -4   4    4.08    2.38 
  -7   4  -4   29.16    2.49 
  -7   4  -4   27.50    4.56 
   7  -4   4   28.70    3.95 
   7  -4   4   24.97    3.45 
  -8   4  -4   97.64    7.14 
  -8   4  -4  103.83    4.14 
   8  -4   4  101.84    6.25 
   8  -4   4  106.32    7.10 
  -9   4  -4    1.13    3.29 
  -9   4  -4    3.21    1.23 
   9  -4   4   -5.30    1.84 
   9  -4   4    2.51    2.75 
 -10   4  -4   -3.89    2.48 
  10  -4   4   -0.73    1.91 
  10  -4   4    0.61    2.44 
 -11   4  -4    1.99    3.12 
  11  -4   4    0.11    2.64 
  11  -4   4    1.72    2.85 
 -12   4  -4   24.97    5.46 
  12  -4   4   30.55    4.94 
  12  -4   4   31.10    6.12 
 -13   4  -4   16.44    5.15 
  13  -4   4   33.18    5.45 
  13  -4   4   19.95    5.65 
 -14   4  -4    4.26    4.21 
  14  -4   4   13.26    4.75 
  14  -4   4   12.24    4.58 
  11   3  -4    3.99    3.85 
 -11  -3   4   -0.86    4.37 
  10   3  -4   -0.83    2.71 
 -10  -3   4   -4.80    3.81 
   9   3  -4    8.33    2.21 
   9   3  -4   16.24    4.64 
  -9  -3   4   16.53    5.71 
   8   3  -4   -1.39    2.67 
   8   3  -4    3.18    1.89 
  -8  -3   4   -3.53    3.65 
  -8  -3   4    0.57    1.54 
   7   3  -4   10.06    3.73 
   7   3  -4   17.50    2.90 
  -7  -3   4   11.29    4.97 
  -7  -3   4   21.00    2.51 
   6   3  -4    7.07    3.43 
   6   3  -4    7.22    2.06 
  -6  -3   4    4.64    1.48 
  -6  -3   4    2.17    4.06 
   5   3  -4    0.26    2.04 
   5   3  -4    1.24    1.65 
  -5  -3   4   -0.45    2.98 
  -5  -3   4    3.96    1.07 
   4   3  -4   20.61    3.74 
   4   3  -4   16.23    2.45 
  -4  -3   4   15.42    4.15 
  -4  -3   4   11.61    1.11 
   3   3  -4   25.70    2.66 
   3   3  -4   28.53    3.51 
  -3  -3   4   27.17    1.23 
  -3  -3   4   21.49    3.89 
   2   3  -4    2.96    1.64 
   2   3  -4    2.62    1.84 
  -2  -3   4    3.17    0.68 
  -2  -3   4    4.02    2.62 
   1   3  -4    1.70    1.49 
   1   3  -4    0.83    1.22 
  -1  -3   4    0.38    0.70 
  -1  -3   4    2.12    2.30 
   0   3  -4   45.44    3.15 
   0   3  -4   47.47    3.24 
   0  -3   4   50.95    4.19 
  -1   3  -4   79.82    4.09 
   1  -3   4   81.76    5.03 
  -2   3  -4  112.87    4.76 
   2  -3   4  112.18    5.78 
   2  -3   4  122.10    4.46 
  -3   3  -4   73.47    3.75 
   3  -3   4   77.34    4.69 
   3  -3   4   71.87    3.33 
  -4   3  -4   14.88    2.16 
   4  -3   4   14.94    2.11 
   4  -3   4   17.47    3.23 
  -5   3  -4   10.49    2.76 
  -5   3  -4   10.77    1.82 
   5  -3   4    7.65    2.49 
   5  -3   4   10.87    2.10 
  -6   3  -4  209.58    8.66 
  -6   3  -4  206.28    6.40 
   6  -3   4  203.19    7.47 
   6  -3   4  195.59    8.60 
  -7   3  -4   76.50    5.86 
  -7   3  -4   71.37    3.46 
   7  -3   4   75.54    5.49 
   7  -3   4   66.81    4.63 
  -8   3  -4   49.42    5.51 
  -8   3  -4   57.16    3.03 
   8  -3   4   50.44    4.55 
   8  -3   4   53.50    5.18 
  -9   3  -4    3.61    1.28 
  -9   3  -4    4.92    3.45 
   9  -3   4    1.89    2.76 
   9  -3   4   -0.57    2.17 
 -10   3  -4    4.87    3.48 
  10  -3   4    3.10    2.65 
  10  -3   4    6.66    3.15 
 -11   3  -4   12.58    4.22 
  11  -3   4   13.02    3.79 
  11  -3   4   19.63    4.80 
 -12   3  -4    2.09    3.41 
  12  -3   4   -0.44    2.83 
  12  -3   4    2.76    2.87 
 -13   3  -4   -2.05    3.28 
  13  -3   4    2.12    3.31 
  13  -3   4    4.37    3.31 
 -14   3  -4    5.85    4.58 
  14  -3   4   10.38    4.06 
  14  -3   4    3.56    3.65 
  12   2  -4    1.72    3.35 
 -12  -2   4    3.50    5.20 
  11   2  -4   10.20    4.42 
 -11  -2   4   22.94    7.05 
  10   2  -4   -3.36    2.86 
 -10  -2   4    8.16    5.75 
   9   2  -4   25.30    5.74 
   9   2  -4   16.29    2.39 
  -9  -2   4   23.63    3.23 
  -9  -2   4   16.76    5.77 
   8   2  -4   27.79    5.47 
   8   2  -4   26.76    2.85 
  -8  -2   4   25.90    3.18 
  -8  -2   4   22.99    5.88 
   7   2  -4    0.27    1.49 
   7   2  -4   -1.30    2.97 
  -7  -2   4    0.46    1.65 
  -7  -2   4    2.78    3.84 
   6   2  -4  117.10    5.24 
   6   2  -4  114.60    7.60 
  -6  -2   4  118.18    8.46 
  -6  -2   4  123.72    4.73 
   5   2  -4   58.95    3.69 
   5   2  -4   54.67    5.17 
  -5  -2   4   65.28    3.02 
  -5  -2   4   67.07    6.25 
   4   2  -4   57.08    3.53 
   4   2  -4   50.41    4.60 
  -4  -2   4   54.02    5.24 
   3   2  -4   -0.52    1.59 
   3   2  -4    2.00    1.50 
  -3  -2   4    2.90    2.49 
  -3  -2   4    0.42    0.73 
   2   2  -4   -0.07    1.42 
   2   2  -4    1.38    1.34 
  -2  -2   4    0.33    0.68 
  -2  -2   4   -3.44    1.87 
   1   2  -4   47.98    3.32 
   1   2  -4   53.52    3.27 
  -1  -2   4   50.00    2.14 
  -1  -2   4   44.57    3.96 
   0   2  -4   35.75    2.79 
   0   2  -4   38.40    2.69 
   0  -2   4   38.85    2.10 
   0  -2   4   34.79    3.33 
  -1   2  -4   38.99    2.84 
  -1   2  -4   37.59    2.27 
   1  -2   4   35.16    2.32 
   1  -2   4   36.10    3.62 
  -2   2  -4  157.36    5.59 
   2  -2   4  158.67    5.42 
   2  -2   4  166.46    6.77 
   2  -2   4  164.90    4.71 
  -3   2  -4  193.69    6.29 
   3  -2   4  206.47    7.64 
   3  -2   4  196.68    5.38 
  -4   2  -4   13.04    2.00 
   4  -2   4   15.13    1.77 
   4  -2   4   18.21    3.23 
  -5   2  -4   14.96    1.97 
   5  -2   4   16.77    3.05 
   5  -2   4   15.96    2.28 
  -6   2  -4   11.92    1.87 
   6  -2   4    8.88    2.63 
   6  -2   4   13.28    2.47 
  -7   2  -4  156.51    5.18 
  -7   2  -4  149.56    7.51 
   7  -2   4  147.44    7.55 
   7  -2   4  160.71    6.82 
  -8   2  -4   -0.93    2.70 
  -8   2  -4    1.33    1.41 
   8  -2   4    1.64    2.30 
   8  -2   4    2.76    2.32 
  -9   2  -4    5.92    3.47 
  -9   2  -4    6.01    1.63 
   9  -2   4   -0.53    2.32 
   9  -2   4    2.47    2.43 
 -10   2  -4   11.53    4.16 
  10  -2   4   15.41    3.89 
  10  -2   4    3.11    2.95 
 -11   2  -4    7.29    3.84 
  11  -2   4    5.89    3.25 
  11  -2   4    8.25    3.35 
 -12   2  -4   -1.66    2.80 
  12  -2   4   -2.30    2.16 
  12  -2   4   -1.20    2.56 
 -13   2  -4   11.78    4.56 
  13  -2   4    5.53    3.21 
  13  -2   4   13.77    4.07 
 -14   2  -4    2.46    3.79 
  14  -2   4   -3.97    2.73 
  14  -2   4    2.09    3.15 
  12   1  -4   20.55    6.02 
 -12  -1   4   23.16    7.41 
  11   1  -4    4.24    3.57 
 -11  -1   4    8.41    5.51 
  10   1  -4   10.98    4.44 
 -10  -1   4    6.81    5.34 
 -10  -1   4   12.54    3.06 
   9   1  -4    5.50    1.55 
   9   1  -4    1.21    2.91 
  -9  -1   4    4.22    2.21 
  -9  -1   4    5.16    4.42 
   8   1  -4   -0.07    2.62 
   8   1  -4    1.82    1.52 
  -8  -1   4   -3.53    3.69 
  -8  -1   4    2.30    2.04 
   7   1  -4   32.79    2.85 
   7   1  -4   32.57    5.08 
  -7  -1   4   35.33    6.33 
  -7  -1   4   36.26    3.49 
   6   1  -4    1.23    1.33 
   6   1  -4    1.92    2.60 
  -6  -1   4    0.83    1.67 
  -6  -1   4   -0.98    3.46 
   5   1  -4    9.49    3.12 
   5   1  -4    7.95    1.88 
  -5  -1   4    8.27    1.85 
  -5  -1   4    3.44    3.02 
   4   1  -4    8.10    2.51 
   4   1  -4   10.13    1.98 
  -4  -1   4    7.65    1.55 
  -4  -1   4    9.93    3.05 
   3   1  -4   56.65    3.34 
   3   1  -4   50.01    4.05 
  -3  -1   4   51.47    4.47 
  -3  -1   4   52.75    2.49 
   2   1  -4    1.51    1.34 
   2   1  -4    1.32    1.53 
  -2  -1   4    1.33    0.87 
  -2  -1   4    1.40    2.14 
   1   1  -4   -1.66    1.24 
   1   1  -4    2.10    1.53 
  -1  -1   4    2.51    2.28 
  -1  -1   4    1.94    0.97 
   0   1  -4   78.35    3.75 
   0   1  -4   83.67    3.52 
   0  -1   4   86.57    4.65 
   0  -1   4   77.24    3.06 
  -1   1  -4    1.92    1.52 
  -1   1  -4   -0.94    0.79 
   1  -1   4    0.43    1.04 
   1  -1   4   -0.91    1.85 
  -2   1  -4   -0.21    1.44 
   2  -1   4   -0.14    1.24 
   2  -1   4    1.30    1.60 
  -3   1  -4   99.79    4.01 
   3  -1   4  102.10    3.04 
   3  -1   4  100.37    5.04 
   3  -1   4  101.35    4.39 
  -4   1  -4   23.66    2.17 
   4  -1   4   27.66    2.00 
   4  -1   4   24.66    2.91 
  -5   1  -4   12.84    1.86 
   5  -1   4   14.28    2.01 
   5  -1   4   15.13    2.85 
  -6   1  -4    9.22    1.71 
   6  -1   4    6.76    1.85 
   6  -1   4    8.27    2.47 
  -7   1  -4  275.72    7.51 
   7  -1   4  259.87    9.21 
   7  -1   4  266.39   10.41 
  -8   1  -4   31.70    4.49 
  -8   1  -4   46.19    2.75 
   8  -1   4   42.13    4.53 
   8  -1   4   45.06    4.15 
  -9   1  -4    6.22    1.65 
  -9   1  -4    0.57    3.18 
   9  -1   4    3.30    2.47 
   9  -1   4    4.25    2.76 
 -10   1  -4    0.60    3.30 
  10  -1   4   -1.20    2.47 
  10  -1   4   -1.17    1.96 
 -11   1  -4    6.40    3.79 
  11  -1   4    3.21    2.77 
  11  -1   4    0.08    2.44 
 -12   1  -4   -1.57    3.35 
  12  -1   4   -0.95    2.43 
  12  -1   4   -0.90    2.26 
 -13   1  -4    1.83    3.37 
  13  -1   4    0.79    2.88 
  13  -1   4    3.43    3.26 
 -14   1  -4    0.50    3.67 
  14  -1   4    1.73    3.25 
  14  -1   4    2.06    3.35 
  12   0  -4    1.74    3.63 
 -12   0   4   -0.43    2.43 
 -12   0   4    0.59    4.85 
  11   0  -4    0.07    3.03 
 -11   0   4    2.34    2.43 
 -11   0   4   -2.57    3.94 
  10   0  -4   -1.46    2.75 
 -10   0   4   -0.82    2.19 
 -10   0   4    2.11    3.79 
   9   0  -4   14.28    4.26 
  -9   0   4   30.83    3.82 
  -9   0   4   31.66    6.38 
   8   0  -4   -2.60    2.65 
   8   0  -4    4.23    1.42 
  -8   0   4    4.84    2.52 
  -8   0   4    5.94    4.28 
   7   0  -4   18.80    4.36 
   7   0  -4   18.91    2.24 
  -7   0   4   14.70    2.84 
  -7   0   4   20.70    5.17 
   6   0  -4   49.75    5.36 
   6   0  -4   55.14    3.26 
  -6   0   4   53.78    3.80 
  -6   0   4   50.81    6.06 
   5   0  -4  174.88    8.54 
   5   0  -4  192.07    6.24 
  -5   0   4  193.01    6.54 
  -5   0   4  174.24    9.01 
   4   0  -4  116.56    6.30 
   4   0  -4  106.46    4.49 
  -4   0   4  119.87    6.68 
  -4   0   4  114.55    4.47 
   3   0  -4   16.77    2.95 
   3   0  -4   17.50    2.06 
  -3   0   4   12.95    3.05 
  -3   0   4   12.09    1.77 
   2   0  -4    1.06    1.40 
   2   0  -4    2.76    1.68 
  -2   0   4    1.40    2.05 
  -2   0   4    3.09    1.14 
   1   0  -4   45.81    2.85 
   1   0  -4   45.87    3.12 
  -1   0   4   46.87    2.40 
  -1   0   4   51.12    3.82 
   0   0  -4   54.57    2.73 
   0   0  -4   55.00    2.99 
   0   0   4   45.81    3.45 
   0   0   4   50.32    2.50 
  -1   0  -4   -0.58    1.31 
  -1   0  -4   -0.79    0.80 
   1   0   4    1.02    1.65 
   1   0   4    0.08    1.03 
  -2   0  -4  379.79    9.83 
   2   0   4  373.68   10.59 
   2   0   4  385.12   10.00 
  -3   0  -4   24.94    2.18 
   3   0   4   27.06    2.50 
   3   0   4   24.69    1.33 
   3   0   4   24.87    2.74 
  -4   0  -4    9.11    1.71 
   4   0   4   12.00    2.41 
   4   0   4   11.24    2.11 
   4   0   4    9.55    1.55 
  -5   0  -4   16.23    1.90 
   5   0   4   18.99    2.64 
   5   0   4   19.17    2.53 
   5   0   4   19.42    2.16 
  -6   0  -4  121.39    4.43 
   6   0   4  107.86    5.88 
   6   0   4  121.14    5.27 
  -7   0  -4   51.87    2.91 
   7   0   4   45.22    4.23 
   7   0   4   48.38    3.87 
  -8   0  -4   12.76    2.03 
   8   0   4    8.28    2.95 
   8   0   4   10.04    2.72 
  -9   0  -4   36.42    4.94 
  -9   0  -4   38.41    2.85 
   9   0   4   38.51    4.69 
   9   0   4   35.17    4.30 
 -10   0  -4   -1.96    2.92 
 -10   0  -4    4.82    1.75 
  10   0   4    5.53    2.82 
  10   0   4    7.93    3.31 
 -11   0  -4   17.04    4.66 
  11   0   4   10.55    3.65 
  11   0   4    8.19    3.30 
 -12   0  -4    3.77    3.51 
  12   0   4    8.44    3.75 
  12   0   4    6.60    3.33 
 -13   0  -4   -3.02    3.10 
  13   0   4    2.52    2.86 
  13   0   4   -2.12    2.52 
 -14   0  -4    1.59    3.53 
  14   0   4    3.38    3.42 
  14   0   4   -1.85    2.68 
  12  -1  -4   39.38    7.50 
 -12   1   4   34.82    5.05 
 -12   1   4   34.66    7.61 
  11  -1  -4   12.47    4.55 
 -11   1   4   13.00    3.63 
 -11   1   4    9.64    5.27 
  10  -1  -4    3.65    3.02 
 -10   1   4    8.73    2.92 
   9  -1  -4    6.27    3.62 
  -9   1   4    6.08    2.72 
   8  -1  -4   -0.35    2.80 
   8  -1  -4    3.10    1.28 
  -8   1   4    1.92    2.39 
   7  -1  -4   28.33    2.29 
   7  -1  -4   32.65    4.79 
  -7   1   4   26.48    3.60 
   6  -1  -4   -0.50    1.14 
   6  -1  -4   -0.04    2.18 
  -6   1   4    2.33    1.98 
  -6   1   4    0.14    3.26 
   5  -1  -4   15.09    1.97 
   5  -1  -4   10.59    3.07 
  -5   1   4   16.35    2.63 
  -5   1   4   14.09    3.77 
   4  -1  -4   11.42    1.89 
   4  -1  -4   11.27    2.86 
  -4   1   4   13.45    2.15 
  -4   1   4   10.52    3.23 
   3  -1  -4   28.40    3.27 
   3  -1  -4   24.73    2.25 
  -3   1   4   25.99    2.28 
  -3   1   4   27.45    3.45 
   2  -1  -4  130.08    5.71 
   2  -1  -4  124.96    4.58 
  -2   1   4  124.85    4.50 
  -2   1   4  138.26    5.94 
   1  -1  -4  171.99    5.50 
   1  -1  -4  168.29    6.00 
  -1   1   4  170.76    5.36 
  -1   1   4  176.22    6.36 
   0  -1  -4   40.28    2.64 
   0  -1  -4   42.17    2.72 
   0   1   4   43.60    3.00 
   0   1   4   39.79    2.40 
  -1  -1  -4  132.40    4.70 
  -1  -1  -4  127.47    3.88 
   1   1   4  127.36    4.96 
   1   1   4  122.90    4.44 
  -2  -1  -4   33.32    2.41 
  -2  -1  -4   37.73    1.81 
   2   1   4   28.22    2.37 
   2   1   4   33.65    2.70 
   3   1   4    9.89    2.03 
   3   1   4   11.36    1.92 
   3   1   4    8.93    1.27 
   4   1   4   65.32    3.72 
   4   1   4   59.37    2.94 
   4   1   4   55.51    3.63 
   5   1   4    1.39    1.35 
   5   1   4    2.64    1.50 
   5   1   4    1.36    1.52 
   6   1   4   14.96    2.49 
   6   1   4    9.39    2.45 
   6   1   4   13.27    2.66 
   7   1   4   50.04    3.95 
   7   1   4   46.78    4.27 
   8   1   4    2.28    2.15 
   8   1   4    0.60    2.20 
   9   1   4    7.54    3.17 
   9   1   4    8.73    3.19 
 -10  -1  -4   50.72    5.55 
  10   1   4   38.56    5.04 
  10   1   4   41.47    5.00 
 -11  -1  -4   10.92    4.07 
  11   1   4   18.04    4.08 
  11   1   4   16.40    4.42 
 -12  -1  -4   24.10    5.32 
  12   1   4   27.60    5.84 
  12   1   4   22.26    4.69 
 -13  -1  -4    6.24    3.90 
  13   1   4    4.34    3.41 
  13   1   4    4.92    3.87 
 -14  -1  -4   -2.39    3.19 
  14   1   4    4.98    3.89 
  14   1   4   -0.62    2.72 
  12  -2  -4    8.24    4.08 
 -12   2   4    7.61    3.62 
  11  -2  -4   31.79    6.28 
 -11   2   4   40.36    5.01 
  10  -2  -4    2.37    3.62 
 -10   2   4    1.23    2.55 
   9  -2  -4   -3.43    2.04 
  -9   2   4    1.37    2.24 
   8  -2  -4    3.99    3.44 
  -8   2   4    6.56    2.87 
   7  -2  -4    0.31    1.07 
   7  -2  -4    0.33    2.69 
  -7   2   4   -0.60    2.01 
   6  -2  -4    2.94    2.75 
   6  -2  -4    0.10    1.16 
  -6   2   4   -1.46    1.77 
   5  -2  -4    8.09    1.59 
   5  -2  -4    6.94    2.81 
  -5   2   4    4.49    1.96 
   4  -2  -4   17.14    3.18 
   4  -2  -4   20.15    2.02 
  -4   2   4   24.79    2.64 
  -4   2   4   23.13    3.83 
   3  -2  -4    0.00    1.16 
   3  -2  -4    0.55    1.73 
  -3   2   4   -0.21    1.23 
  -3   2   4    1.59    2.06 
   2  -2  -4    4.29    1.44 
   2  -2  -4    1.88    1.82 
  -2   2   4    1.39    1.35 
  -2   2   4    4.81    2.16 
   1  -2  -4   78.44    3.48 
   1  -2  -4   76.54    4.04 
  -1   2   4   78.85    3.53 
  -1   2   4   78.13    3.98 
   0  -2  -4    2.56    1.53 
   0  -2  -4    3.72    1.47 
   0   2   4    3.77    1.47 
   0   2   4    3.47    1.31 
  -1  -2  -4   47.29    2.71 
   1   2   4   49.98    2.79 
   1   2   4   48.15    2.84 
  -2  -2  -4   19.18    2.03 
   2   2   4   20.35    2.07 
   2   2   4   19.84    2.07 
   3   2   4   38.43    2.73 
   3   2   4   36.34    2.69 
   4   2   4  348.09    9.90 
   4   2   4  331.08    9.82 
   4   2   4  340.23    9.34 
   5   2   4    2.37    1.50 
   5   2   4    0.02    1.36 
   5   2   4   -1.10    1.25 
   6   2   4   41.70    3.70 
   6   2   4   58.20    3.92 
   6   2   4   49.89    3.68 
   7   2   4  147.90    7.29 
   7   2   4  145.96    6.82 
   8   2   4    1.70    2.10 
   8   2   4   -0.35    1.68 
   9   2   4   64.03    5.68 
   9   2   4   66.23    5.55 
  10   2   4   -1.72    2.26 
  10   2   4    4.74    3.09 
 -11  -2  -4   -0.85    2.74 
  11   2   4    0.53    2.52 
  11   2   4    1.56    2.54 
 -12  -2  -4   16.58    4.38 
  12   2   4    6.91    3.55 
  12   2   4    7.37    3.60 
 -13  -2  -4   -3.27    2.87 
  13   2   4    8.85    4.46 
  13   2   4    3.45    3.12 
 -14  -2  -4    3.55    3.78 
  14   2   4   -1.53    3.00 
  14   2   4    4.39    3.84 
  12  -3  -4   24.53    5.99 
 -12   3   4   20.50    4.53 
  11  -3  -4    9.53    4.10 
 -11   3   4    3.59    2.90 
  10  -3  -4   11.15    4.21 
 -10   3   4    7.47    3.13 
   9  -3  -4    5.47    3.27 
  -9   3   4    0.48    2.45 
   8  -3  -4    2.15    3.04 
  -8   3   4   -3.66    1.91 
   7  -3  -4   75.71    3.03 
   7  -3  -4   63.25    6.12 
  -7   3   4   73.26    5.34 
   6  -3  -4    1.28    1.31 
   6  -3  -4    0.16    2.49 
  -6   3   4   -0.89    1.88 
   5  -3  -4   14.04    3.37 
   5  -3  -4   13.66    1.90 
  -5   3   4   11.73    2.63 
   4  -3  -4  103.16    3.97 
   4  -3  -4  108.39    6.23 
  -4   3   4   96.97    4.92 
   3  -3  -4   12.72    2.69 
   3  -3  -4    9.89    1.71 
  -3   3   4   14.11    2.78 
  -3   3   4   14.87    2.31 
   2  -3  -4   12.20    1.77 
   2  -3  -4   13.70    2.75 
  -2   3   4   13.64    2.14 
  -2   3   4   10.51    2.31 
   1  -3  -4   21.25    2.75 
  -1   3   4   22.40    2.27 
  -1   3   4   21.63    2.34 
   0  -3  -4   91.86    4.23 
   0   3   4   86.60    3.90 
   0   3   4   91.48    3.45 
  -1  -3  -4    2.32    1.59 
   1   3   4    0.81    1.16 
   1   3   4    1.05    1.12 
  -2  -3  -4   89.98    4.13 
   2   3   4   90.90    3.94 
   2   3   4   84.08    3.32 
   2   3   4   82.41    3.84 
   3   3   4   41.35    2.83 
   3   3   4   37.16    2.57 
   3   3   4   36.68    2.71 
   4   3   4  158.31    5.86 
   4   3   4  169.59    6.14 
   4   3   4  162.43    6.02 
   4   3   4  162.20    6.04 
   5   3   4   16.21    2.25 
   5   3   4   15.93    2.45 
   5   3   4   15.91    2.37 
   5   3   4   14.78    2.04 
   6   3   4   18.09    2.87 
   6   3   4   16.10    2.15 
   6   3   4   14.49    2.75 
   6   3   4   18.05    2.76 
   7   3   4   12.26    2.63 
   7   3   4    4.89    2.53 
   7   3   4    7.94    2.46 
   7   3   4   11.46    2.14 
   8   3   4   40.44    4.21 
   8   3   4   43.09    3.30 
   8   3   4   39.61    4.28 
   9   3   4   -3.05    1.93 
   9   3   4    1.42    1.48 
   9   3   4   -1.09    2.16 
  10   3   4   16.66    3.91 
  10   3   4    8.19    3.51 
 -11  -3  -4    5.62    3.10 
  11   3   4    9.30    3.64 
  11   3   4    1.49    2.55 
 -12  -3  -4   37.21    5.83 
  12   3   4   29.79    6.12 
  12   3   4   32.94    4.93 
 -13  -3  -4   -1.44    2.89 
  13   3   4    3.24    3.54 
  13   3   4    0.29    2.93 
 -14  -3  -4    4.89    3.70 
  14   3   4   -0.54    3.19 
  12  -4  -4   15.82    5.63 
 -12   4   4   15.20    4.11 
  11  -4  -4   -1.83    2.60 
 -11   4   4   -2.84    2.30 
  10  -4  -4    2.33    3.35 
 -10   4   4   -3.95    2.08 
   9  -4  -4    1.09    2.79 
  -9   4   4    3.60    2.77 
   8  -4  -4   27.30    5.33 
  -8   4   4   16.33    3.82 
   7  -4  -4   54.24    2.58 
   7  -4  -4   54.26    5.95 
  -7   4   4   45.47    4.82 
   6  -4  -4    2.31    1.34 
   6  -4  -4    0.51    2.89 
  -6   4   4    0.82    2.09 
   5  -4  -4    0.92    1.32 
   5  -4  -4    6.59    2.70 
  -5   4   4    0.47    1.73 
   4  -4  -4   19.82    3.62 
   4  -4  -4   14.20    1.91 
  -4   4   4   18.10    2.76 
   3  -4  -4   15.90    2.06 
   3  -4  -4   14.72    3.18 
  -3   4   4   10.59    2.33 
   2  -4  -4   92.78    5.06 
  -2   4   4   84.80    4.26 
  -2   4   4   80.99    4.11 
   1  -4  -4   11.83    2.44 
  -1   4   4   13.75    2.20 
  -1   4   4   10.95    1.76 
   0  -4  -4   28.40    2.99 
   0   4   4   26.36    2.32 
   0   4   4   28.82    2.49 
   0   4   4   27.36    1.72 
  -1  -4  -4   30.50    3.08 
   1   4   4   29.95    2.46 
   1   4   4   29.28    2.48 
   1   4   4   26.96    1.50 
  -2  -4  -4   -0.69    1.70 
   2   4   4    2.23    1.34 
   2   4   4   -0.44    1.08 
   2   4   4   -0.20    0.81 
   3   4   4    6.08    1.70 
   3   4   4    7.73    1.76 
   3   4   4    6.47    1.58 
   4   4   4   27.80    2.59 
   4   4   4   18.02    2.34 
   4   4   4   20.88    2.30 
   5   4   4   57.43    3.83 
   5   4   4   60.44    3.74 
   5   4   4   63.54    4.20 
   5   4   4   58.09    3.73 
   6   4   4   54.50    3.92 
   6   4   4   60.51    3.82 
   6   4   4   60.06    4.23 
   6   4   4   59.45    4.47 
   7   4   4    5.25    1.97 
   7   4   4    2.04    2.13 
   7   4   4    3.92    1.89 
   7   4   4    1.19    1.81 
   8   4   4    2.41    2.47 
   8   4   4   -0.23    1.83 
   8   4   4    4.07    2.50 
   8   4   4    3.58    1.92 
   9   4   4    5.16    2.85 
   9   4   4   11.79    2.65 
   9   4   4    8.41    3.16 
  10   4   4   10.07    3.37 
  10   4   4   16.79    2.99 
  10   4   4    9.09    3.45 
  11   4   4    2.69    2.88 
  11   4   4   -0.97    2.28 
  11   4   4   -0.36    1.49 
 -12  -4  -4    0.87    3.01 
  12   4   4    1.18    3.06 
  12   4   4    1.94    2.78 
 -13  -4  -4    9.92    4.15 
  13   4   4    5.81    3.60 
 -14  -4  -4    6.96    4.09 
  14   4   4    1.81    3.40 
  12  -5  -4    2.60    3.73 
 -12   5   4    1.22    3.16 
  11  -5  -4   22.97    5.97 
 -11   5   4   18.65    4.46 
  10  -5  -4   13.41    4.37 
 -10   5   4   18.38    4.24 
   9  -5  -4   -0.90    2.46 
  -9   5   4   -3.18    2.11 
   8  -5  -4    6.18    3.35 
  -8   5   4   19.22    4.08 
   7  -5  -4   32.92    2.21 
   7  -5  -4   29.62    5.41 
  -7   5   4   22.14    3.99 
   6  -5  -4   85.82    3.62 
   6  -5  -4   88.93    6.91 
  -6   5   4   80.10    5.71 
   5  -5  -4   24.70    2.35 
   5  -5  -4   15.14    3.85 
  -5   5   4   13.54    2.96 
   4  -5  -4   25.21    4.23 
  -4   5   4   19.34    3.00 
   3  -5  -4    7.01    2.80 
  -3   5   4    6.16    2.04 
   2  -5  -4  145.47    6.81 
  -2   5   4  134.48    5.78 
  -2   5   4  148.91    5.18 
   1  -5  -4   16.13    3.19 
  -1   5   4   14.22    1.91 
  -1   5   4   11.69    1.60 
  -1   5   4   13.91    2.35 
   0  -5  -4   20.16    2.96 
   0   5   4   22.23    2.33 
   0   5   4   18.59    2.20 
  -1  -5  -4    3.72    2.07 
   1   5   4    0.44    1.24 
   1   5   4    0.48    1.14 
  -2  -5  -4   39.43    3.75 
   2   5   4   43.47    1.96 
   2   5   4   42.26    2.93 
   2   5   4   41.00    3.06 
   3   5   4   12.43    2.12 
   3   5   4    8.01    1.89 
   3   5   4   10.29    1.56 
   4   5   4   94.60    4.44 
   4   5   4   83.67    4.52 
   4   5   4   92.03    4.18 
   5   5   4    2.81    2.01 
   5   5   4    5.11    1.82 
   5   5   4    5.17    1.83 
   5   5   4    3.05    1.63 
   6   5   4    1.21    1.45 
   6   5   4    0.23    1.53 
   6   5   4    2.46    2.02 
   6   5   4    0.10    1.76 
   7   5   4   82.05    4.91 
   7   5   4   86.04    6.03 
   7   5   4   79.54    5.55 
   7   5   4   84.30    4.85 
   8   5   4   13.62    2.71 
   8   5   4   12.85    3.70 
   8   5   4   16.11    3.18 
   8   5   4   13.82    3.51 
   9   5   4   88.41    5.29 
   9   5   4   91.46    6.90 
   9   5   4   95.14    7.01 
  10   5   4   15.40    3.86 
  10   5   4   14.54    4.21 
  10   5   4   11.30    2.69 
  11   5   4   -1.09    1.54 
  11   5   4    0.78    2.71 
 -12  -5  -4   33.22    4.96 
  12   5   4   30.78    5.73 
  12   5   4   18.08    3.23 
 -13  -5  -4   11.12    3.97 
  13   5   4   14.76    4.50 
  11  -6  -4    1.72    3.40 
 -11   6   4   -0.20    2.55 
  10  -6  -4   14.29    4.97 
 -10   6   4    9.92    3.75 
   9  -6  -4    2.30    3.17 
  -9   6   4   -1.78    2.29 
   8  -6  -4   10.98    4.05 
  -8   6   4    9.41    3.12 
   7  -6  -4   37.40    5.45 
  -7   6   4   36.21    4.75 
   6  -6  -4    7.86    3.50 
   6  -6  -4    8.64    1.95 
  -6   6   4   12.88    3.38 
   5  -6  -4    0.61    2.50 
  -5   6   4    1.47    2.20 
   4  -6  -4   61.34    5.40 
  -4   6   4   58.16    4.47 
   3  -6  -4    1.83    2.18 
  -3   6   4    3.22    1.38 
  -3   6   4    4.21    2.02 
   2  -6  -4   34.31    4.03 
  -2   6   4   31.44    3.05 
  -2   6   4   35.21    2.89 
   1  -6  -4   16.49    3.16 
  -1   6   4   11.03    1.31 
  -1   6   4    8.29    2.01 
  -1   6   4   15.00    2.28 
   0  -6  -4  143.17    6.67 
   0   6   4  143.56    5.76 
   0   6   4  143.72    5.74 
  -1  -6  -4   11.48    3.03 
   1   6   4    7.09    1.87 
   1   6   4    7.70    1.85 
  -2  -6  -4   63.21    4.77 
  -2  -6  -4   70.35    2.62 
   2   6   4   69.92    3.78 
   2   6   4   70.60    4.08 
  -3  -6  -4    3.35    2.49 
   3   6   4    2.75    1.60 
   3   6   4    1.42    1.47 
   4   6   4    6.62    1.95 
   4   6   4    6.79    2.00 
   5   6   4    9.97    2.22 
   5   6   4   14.38    2.66 
   6   6   4    8.83    2.90 
   6   6   4    8.87    2.25 
   6   6   4   11.06    2.40 
   7   6   4   43.41    3.77 
   7   6   4   43.42    4.81 
   7   6   4   45.33    4.00 
   8   6   4    2.48    2.63 
   8   6   4    3.70    2.07 
   8   6   4    1.98    2.02 
   9   6   4    2.35    2.62 
   9   6   4    0.41    1.66 
  10   6   4   -0.78    1.54 
  10   6   4    2.02    2.86 
  11   6   4    9.02    2.72 
  11   6   4   10.28    3.65 
 -12  -6  -4   36.40    4.98 
  12   6   4   31.40    6.05 
  12   6   4   28.17    3.99 
 -13  -6  -4   -1.35    2.89 
  13   6   4   -1.58    2.46 
  11  -7  -4   -0.16    3.59 
 -11   7   4    0.83    2.95 
  10  -7  -4    0.73    3.10 
 -10   7   4    5.20    3.49 
   9  -7  -4   -2.49    2.35 
  -9   7   4    1.68    2.69 
   8  -7  -4   -0.01    2.63 
  -8   7   4    2.94    2.70 
   7  -7  -4    1.12    2.93 
  -7   7   4   -1.22    2.20 
   6  -7  -4   13.63    2.13 
   6  -7  -4   12.12    4.17 
  -6   7   4   14.71    3.85 
   5  -7  -4    8.00    3.68 
  -5   7   4    6.15    2.59 
   4  -7  -4   23.66    4.35 
  -4   7   4   20.20    3.42 
   3  -7  -4    9.18    3.34 
  -3   7   4    2.54    1.53 
  -3   7   4    3.51    2.11 
   2  -7  -4   -1.12    2.53 
  -2   7   4   -0.80    1.38 
  -2   7   4    0.92    1.43 
   1  -7  -4   19.99    3.78 
  -1   7   4   18.01    2.36 
  -1   7   4   18.21    2.67 
   0  -7  -4   -0.39    2.11 
   0   7   4    0.42    1.32 
   0   7   4    0.80    1.24 
  -1  -7  -4    1.87    2.62 
   1   7   4   -1.13    1.22 
   1   7   4    1.33    1.49 
  -2  -7  -4    3.46    2.78 
  -2  -7  -4    4.25    1.19 
   2   7   4    5.27    1.75 
   2   7   4    1.76    1.46 
  -3  -7  -4    8.30    1.91 
  -3  -7  -4    7.94    3.12 
   3   7   4    8.59    2.12 
   3   7   4    4.33    1.73 
   4   7   4    1.53    1.54 
   4   7   4    1.04    1.39 
   5   7   4   35.40    3.21 
   5   7   4   33.87    3.40 
   6   7   4    8.30    2.30 
   6   7   4    7.81    2.36 
   7   7   4   26.03    3.23 
   7   7   4   19.65    3.45 
   7   7   4   17.34    4.16 
   8   7   4    6.86    3.33 
   8   7   4    7.61    2.37 
   8   7   4    9.46    2.77 
   9   7   4   53.39    4.40 
   9   7   4   40.37    4.03 
   9   7   4   56.18    5.98 
  10   7   4   47.35    5.89 
  10   7   4   37.19    4.15 
  11   7   4    4.03    2.41 
  11   7   4    2.86    2.69 
 -12  -7  -4   13.43    3.67 
  12   7   4    4.11    3.59 
  12   7   4    9.55    3.11 
  13   7   4    1.81    3.25 
  11  -8  -4    0.93    3.67 
 -11   8   4    1.27    2.78 
  10  -8  -4    9.61    4.68 
 -10   8   4    7.95    3.91 
   9  -8  -4   -2.96    2.60 
  -9   8   4   -2.62    2.75 
   8  -8  -4   -0.54    3.01 
  -8   8   4   -1.49    2.12 
   7  -8  -4   -0.86    2.35 
  -7   8   4    2.83    2.73 
   6  -8  -4    9.58    4.26 
  -6   8   4    5.19    2.75 
   5  -8  -4   15.29    4.66 
  -5   8   4   15.21    3.76 
   4  -8  -4   37.97    5.53 
  -4   8   4   43.63    4.42 
  -4   8   4   49.52    3.54 
   3  -8  -4   14.55    4.00 
  -3   8   4   15.56    3.22 
  -3   8   4   20.07    2.64 
   2  -8  -4  120.88    7.57 
  -2   8   4  128.70    5.70 
  -2   8   4  106.64    5.85 
   1  -8  -4    2.75    2.69 
  -1   8   4   -2.28    1.31 
  -1   8   4    0.41    1.49 
   0  -8  -4    7.20    3.26 
   0   8   4    9.78    2.37 
   0   8   4   10.56    2.39 
  -1  -8  -4   74.76    6.17 
   1   8   4   76.48    4.66 
   1   8   4   82.39    4.54 
  -2  -8  -4   24.65    4.60 
   2   8   4   12.90    2.63 
   2   8   4   17.60    2.78 
  -3  -8  -4  209.77    6.63 
  -3  -8  -4  213.68   10.13 
   3   8   4  207.70    7.54 
   3   8   4  206.94    8.22 
  -4  -8  -4   14.94    2.99 
   4   8   4   13.00    2.82 
   4   8   4   18.33    2.65 
  -5  -8  -4   21.33    3.74 
   5   8   4   16.54    2.78 
   5   8   4   16.74    3.05 
   6   8   4   19.47    2.96 
   6   8   4   21.39    3.60 
   7   8   4    1.73    1.90 
   7   8   4    0.49    1.77 
   8   8   4   67.91    5.16 
   8   8   4   76.96    4.97 
   8   8   4   66.95    6.58 
   9   8   4   13.27    2.96 
   9   8   4   10.21    3.83 
   9   8   4    4.38    2.13 
  10   8   4    4.62    3.20 
  10   8   4   -0.63    1.99 
  11   8   4    4.89    3.44 
  11   8   4    0.13    1.99 
  12   8   4   -2.47    2.00 
  12   8   4    1.79    3.27 
  10  -9  -4    2.40    3.80 
 -10   9   4    4.70    3.42 
   9  -9  -4   12.46    4.60 
  -9   9   4   13.16    4.01 
   8  -9  -4   39.47    5.99 
  -8   9   4   34.31    5.17 
   7  -9  -4   12.01    3.95 
  -7   9   4   14.35    3.91 
   6  -9  -4    0.62    2.93 
  -6   9   4   -3.15    1.79 
   5  -9  -4   28.18    5.44 
  -5   9   4   23.61    2.87 
  -5   9   4   13.55    3.43 
   4  -9  -4    5.56    3.81 
  -4   9   4   17.27    2.87 
  -4   9   4    8.55    2.98 
   3  -9  -4    6.89    3.60 
  -3   9   4   13.99    3.20 
  -3   9   4   11.42    2.59 
   2  -9  -4    2.06    3.25 
  -2   9   4    1.67    2.01 
  -2   9   4    1.43    1.87 
   1  -9  -4   -0.80    2.80 
  -1   9   4   -2.30    1.44 
  -1   9   4   -2.16    1.40 
   0  -9  -4    1.45    3.01 
   0   9   4    0.67    1.62 
   0   9   4    0.51    1.65 
  -1  -9  -4   -1.67    3.24 
   1   9   4   -1.73    1.32 
   1   9   4    1.83    1.71 
  -2  -9  -4    4.23    3.49 
   2   9   4   -1.89    1.50 
   2   9   4   -1.48    1.46 
  -3  -9  -4   62.36    3.95 
  -3  -9  -4   70.49    6.62 
   3   9   4   60.28    4.13 
   3   9   4   63.32    4.75 
  -4  -9  -4    2.61    2.51 
  -4  -9  -4    7.75    4.19 
   4   9   4   -0.34    1.62 
   4   9   4   -0.95    1.71 
  -5  -9  -4    5.44    2.93 
   5   9   4    4.30    2.49 
   5   9   4    2.29    1.82 
  -6  -9  -4   13.62    3.93 
   6   9   4   15.81    3.00 
   6   9   4   15.46    3.22 
  -7  -9  -4   15.77    4.21 
   7   9   4   11.03    2.65 
   7   9   4    7.98    2.81 
  -8  -9  -4    8.96    3.97 
   8   9   4    6.26    2.48 
   8   9   4    3.68    2.34 
  -9  -9  -4    0.68    3.45 
   9   9   4    1.62    2.10 
   9   9   4    1.85    2.11 
 -10  -9  -4   -2.70    3.19 
  10   9   4   -2.45    1.69 
  10   9   4    0.23    2.72 
 -11  -9  -4   -5.91    3.33 
  11   9   4   -2.17    2.50 
  11   9   4    4.04    2.70 
  10 -10  -4    2.63    3.67 
 -10  10   4    0.87    3.11 
   9 -10  -4    0.47    3.39 
  -9  10   4   -2.13    2.29 
   8 -10  -4    0.12    3.02 
  -8  10   4    6.58    3.06 
   7 -10  -4   -0.65    3.01 
  -7  10   4    1.64    2.41 
   6 -10  -4    3.01    2.99 
  -6  10   4   -1.25    1.98 
   5 -10  -4    3.96    3.31 
  -5  10   4    0.19    2.03 
  -5  10   4   -2.10    1.29 
   4 -10  -4    8.24    3.87 
  -4  10   4   14.86    2.89 
  -4  10   4   11.25    3.26 
   3 -10  -4    4.54    3.87 
  -3  10   4    0.63    2.19 
  -3  10   4    0.85    1.75 
   2 -10  -4    0.88    3.25 
  -2  10   4   -0.55    1.63 
  -2  10   4    0.27    2.17 
   1 -10  -4    0.12    3.30 
  -1  10   4    1.89    2.04 
  -1  10   4    2.76    2.02 
   0 -10  -4    2.50    3.33 
   0  10   4    3.20    2.01 
   0  10   4    1.86    2.09 
  -1 -10  -4    3.92    3.98 
   1  10   4    2.80    1.99 
   1  10   4    2.69    1.88 
  -2 -10  -4   11.40    4.68 
   2  10   4    5.43    2.27 
   2  10   4    5.91    2.39 
  -3 -10  -4    5.05    2.20 
  -3 -10  -4    0.73    3.92 
   3  10   4    5.53    2.17 
   3  10   4    3.17    2.09 
  -4 -10  -4    5.46    2.78 
  -4 -10  -4    6.81    4.48 
   4  10   4    5.18    2.17 
   4  10   4    4.26    2.69 
  -5 -10  -4    0.78    2.87 
   5  10   4    1.80    2.11 
   5  10   4   -1.33    1.46 
  -6 -10  -4    4.39    2.65 
   6  10   4    2.58    2.04 
   6  10   4   -0.20    1.62 
  -7 -10  -4   11.50    3.76 
   7  10   4    6.28    2.23 
   7  10   4    7.59    2.73 
  -8 -10  -4    7.95    3.91 
   8  10   4    9.64    2.64 
   8  10   4    5.22    2.73 
  -9 -10  -4    0.82    4.24 
   9  10   4    1.18    2.10 
 -10 -10  -4    7.88    4.61 
  10  10   4    4.15    2.62 
 -11 -10  -4   -3.72    3.85 
  11  10   4    1.03    2.58 
   9 -11  -4   11.82    4.98 
  -9  11   4    6.84    3.24 
   8 -11  -4    8.76    4.56 
  -8  11   4    5.52    3.10 
   7 -11  -4    9.06    4.75 
  -7  11   4    5.35    3.44 
   6 -11  -4    5.82    4.02 
  -6  11   4    0.60    1.72 
  -6  11   4    0.37    2.43 
   5 -11  -4    1.90    3.55 
  -5  11   4    1.99    2.09 
  -5  11   4    4.21    3.01 
   4 -11  -4    9.92    3.81 
  -4  11   4    8.59    2.48 
  -4  11   4   15.72    3.62 
   3 -11  -4   27.89    5.50 
  -3  11   4   34.29    4.18 
  -3  11   4   31.66    3.55 
   2 -11  -4   11.90    4.27 
  -2  11   4    9.57    3.03 
  -2  11   4    5.71    2.40 
   1 -11  -4    4.38    3.61 
  -1  11   4    0.57    1.95 
  -1  11   4    2.51    2.14 
   0 -11  -4    5.35    4.04 
   0  11   4    8.50    2.52 
   0  11   4    8.44    2.65 
  -1 -11  -4    6.54    4.38 
   1  11   4    7.08    2.69 
   1  11   4    3.35    2.06 
  -2 -11  -4   13.51    5.06 
   2  11   4   18.89    3.20 
   2  11   4   17.19    3.63 
  -3 -11  -4   34.94    6.55 
   3  11   4   23.67    3.10 
   3  11   4   21.00    3.88 
  -4 -11  -4    7.01    4.45 
   4  11   4    1.71    2.00 
   4  11   4    5.47    2.20 
  -5 -11  -4   -5.25    2.84 
   5  11   4   -2.28    1.29 
   5  11   4    0.39    1.43 
  -6 -11  -4   22.09    4.29 
   6  11   4   18.84    3.30 
   6  11   4   22.39    4.09 
  -7 -11  -4    6.32    3.58 
   7  11   4   -1.19    1.80 
   7  11   4    0.80    1.77 
  -8 -11  -4   14.59    4.16 
   8  11   4   10.37    3.26 
  -9 -11  -4   17.65    4.97 
   9  11   4   14.95    3.77 
 -10 -11  -4   10.54    4.88 
  10  11   4   -1.41    1.91 
   8 -12  -4    6.23    4.33 
  -8  12   4    7.92    3.88 
   7 -12  -4   17.02    5.56 
  -7  12   4   18.01    4.55 
   6 -12  -4    1.93    3.57 
  -6  12   4    5.04    2.42 
  -6  12   4    1.24    2.72 
   5 -12  -4   15.52    5.05 
  -5  12   4   19.71    4.34 
  -5  12   4   16.18    3.29 
   4 -12  -4    0.60    3.43 
  -4  12   4    6.71    2.91 
  -4  12   4    3.90    2.17 
   3 -12  -4    2.14    3.51 
  -3  12   4   -0.14    1.92 
  -3  12   4    3.00    2.70 
   2 -12  -4   43.88    6.00 
  -2  12   4   39.62    4.42 
  -2  12   4   35.80    4.06 
   1 -12  -4   17.43    4.61 
  -1  12   4   24.80    3.58 
  -1  12   4   22.12    3.92 
   0 -12  -4   15.26    4.57 
   0  12   4   12.13    2.93 
   0  12   4   11.65    3.04 
  -1 -12  -4    8.19    4.43 
   1  12   4   10.20    2.95 
   1  12   4   15.03    2.92 
  -2 -12  -4   -0.47    3.41 
   2  12   4    2.13    2.08 
   2  12   4    4.26    2.14 
  -3 -12  -4   -0.48    3.79 
   3  12   4    0.49    1.82 
   3  12   4   -0.36    1.79 
  -4 -12  -4   29.89    6.57 
   4  12   4   20.56    3.10 
   4  12   4   18.56    3.79 
  -5 -12  -4    7.99    5.00 
   5  12   4    8.06    2.54 
   5  12   4    5.17    2.53 
  -6 -12  -4   25.62    6.79 
   6  12   4   21.00    3.18 
   6  12   4   17.57    3.95 
   7  12   4    2.08    2.36 
   8  12   4    5.35    2.64 
   9  12   4    1.42    2.63 
   7 -13  -4   15.13    5.83 
  -7  13   4    9.57    3.92 
   6 -13  -4    6.25    3.79 
  -6  13   4    5.65    3.03 
   5 -13  -4   -2.11    3.13 
  -5  13   4    1.63    2.50 
  -5  13   4    2.24    2.40 
   4 -13  -4    4.90    3.92 
  -4  13   4    5.29    2.96 
  -4  13   4   -0.74    1.91 
   3 -13  -4    0.49    3.86 
  -3  13   4   -0.24    1.89 
  -3  13   4    0.42    2.41 
   2 -13  -4    3.46    3.90 
  -2  13   4    2.54    2.40 
  -2  13   4    3.49    2.67 
   1 -13  -4    8.42    4.32 
  -1  13   4   15.43    3.45 
  -1  13   4    7.90    2.85 
   0 -13  -4   11.06    4.56 
   0  13   4   12.22    3.43 
   0  13   4    8.63    2.70 
  -1 -13  -4    4.58    3.69 
   1  13   4    1.91    1.98 
   1  13   4   -0.72    1.87 
  -2 -13  -4   -1.60    3.60 
   2  13   4    0.48    1.93 
   2  13   4    0.90    2.19 
  -3 -13  -4    1.98    3.95 
   3  13   4    0.75    2.13 
   3  13   4    0.04    1.74 
  -4 -13  -4    4.74    5.17 
   4  13   4    8.67    2.66 
   4  13   4   11.09    3.21 
  -5 -13  -4    5.35    4.53 
   5  13   4   -0.02    2.53 
   5  13   4    2.78    2.00 
  -6 -13  -4    8.83    4.95 
   6  13   4    7.52    3.04 
  -7 -13  -4   -0.98    4.41 
   7  13   4   -1.32    2.22 
   8  13   4   -0.20    2.28 
   6 -14  -4    4.01    4.40 
  -6  14   4    1.34    2.83 
   5 -14  -4   -1.80    3.37 
  -5  14   4   -0.40    2.16 
  -5  14   4   -3.41    2.00 
   4 -14  -4   15.02    5.24 
  -4  14   4   27.74    5.04 
  -4  14   4   28.68    4.02 
   3 -14  -4   13.74    5.00 
  -3  14   4    7.57    2.98 
  -3  14   4   12.38    3.49 
   2 -14  -4    3.12    3.60 
  -2  14   4    1.56    2.25 
  -2  14   4    4.73    2.65 
   1 -14  -4    8.97    4.59 
  -1  14   4    7.92    2.74 
  -1  14   4    8.51    3.19 
   0 -14  -4   16.32    5.33 
   0  14   4   13.73    3.68 
   0  14   4   13.78    3.44 
  -1 -14  -4    6.16    4.73 
   1  14   4    3.50    2.36 
   1  14   4    1.77    2.41 
  -2 -14  -4   25.82    6.76 
   2  14   4   25.65    4.76 
   2  14   4   27.29    3.73 
  -3 -14  -4   25.38    6.23 
   3  14   4   22.38    4.52 
   3  14   4   19.63    3.54 
  -4 -14  -4    6.59    4.88 
   4  14   4   -0.63    1.62 
   4  14   4    0.80    2.16 
  -5 -14  -4   22.92    7.23 
   5  14   4    7.52    3.10 
  -6 -14  -4    7.37    5.13 
   6  14   4    0.79    2.54 
  -7 -14  -4    9.65    5.75 
   4 -15  -4    7.61    4.38 
  -4  15   4    2.97    3.05 
  -4  15   4    2.40    2.55 
   3 -15  -4   -0.38    4.01 
  -3  15   4    3.49    2.79 
  -3  15   4   -3.85    1.60 
   2 -15  -4    1.75    3.95 
  -2  15   4    2.22    2.68 
  -2  15   4    0.32    2.44 
   1 -15  -4   11.89    5.11 
  -1  15   4    2.21    2.57 
  -1  15   4    7.76    2.84 
   0 -15  -4    7.41    4.43 
   0  15   4    8.83    3.43 
   0  15   4   11.64    3.14 
  -1 -15  -4    3.74    4.25 
   1  15   4   -0.67    2.07 
   1  15   4   -4.25    2.00 
  -2 -15  -4   20.16    6.27 
   2  15   4    7.55    2.79 
   2  15   4   12.32    3.83 
  -3 -15  -4    6.34    5.02 
   3  15   4   -1.21    1.58 
   3  15   4    0.84    2.59 
  -4 -15  -4   -1.25    3.78 
   4  15   4   -1.78    2.27 
  -5 -15  -4   12.46    6.07 
   0  14  -5    0.14    2.36 
   0 -14   5   -7.24    3.95 
   0 -14   5    7.49    4.83 
  -1  14  -5   -0.52    2.16 
   1 -14   5    2.17    3.51 
   1 -14   5   -4.40    3.99 
  -2  14  -5    3.93    2.94 
   2 -14   5    3.26    3.61 
   2 -14   5   -2.97    3.47 
  -3  14  -5   28.45    5.29 
   3 -14   5   15.90    5.48 
   3 -14   5   21.50    5.47 
  -4  14  -5    2.09    2.46 
   4 -14   5    4.02    3.91 
   4 -14   5   13.58    5.27 
   3  13  -5    2.59    2.27 
  -3 -13   5   -1.40    4.10 
  -3 -13   5    0.54    4.55 
   2  13  -5   -0.85    2.47 
  -2 -13   5    2.19    4.46 
  -2 -13   5    4.39    4.41 
   1  13  -5    0.83    2.55 
  -1 -13   5    1.84    3.79 
  -1 -13   5   -1.66    4.03 
   0  13  -5    3.81    3.02 
   0 -13   5   11.69    4.96 
   0 -13   5   15.32    5.04 
  -1  13  -5    5.02    3.04 
   1 -13   5    5.11    4.26 
   1 -13   5    2.19    3.34 
  -2  13  -5    0.48    2.56 
   2 -13   5   -1.06    3.92 
   2 -13   5    3.08    3.68 
  -3  13  -5    2.81    2.09 
  -3  13  -5    9.90    3.39 
   3 -13   5   -1.16    3.46 
   3 -13   5    3.10    3.54 
  -4  13  -5    6.91    3.05 
  -4  13  -5   -0.49    2.25 
   4 -13   5   -2.63    3.37 
   4 -13   5    0.92    2.97 
  -5  13  -5    1.62    2.39 
  -5  13  -5    1.63    2.83 
   5 -13   5    3.35    3.87 
   5 -13   5    0.24    3.12 
  -6  13  -5    0.23    2.38 
  -6  13  -5    1.06    2.69 
   6 -13   5    4.99    3.50 
   6 -13   5    5.56    4.02 
  -7  13  -5    0.67    2.38 
  -7  13  -5   -4.28    2.17 
   7 -13   5   -1.27    2.86 
   7 -13   5   -4.77    2.63 
   5  12  -5    3.23    2.77 
  -5 -12   5   -4.60    3.88 
   4  12  -5   -1.15    2.28 
  -4 -12   5    4.93    4.67 
   3  12  -5    4.48    2.63 
  -3 -12   5    4.79    4.58 
   2  12  -5    2.84    2.46 
  -2 -12   5    2.75    4.20 
  -2 -12   5    2.36    4.10 
   1  12  -5    1.85    2.56 
  -1 -12   5    0.31    3.61 
  -1 -12   5   -3.91    3.35 
   0  12  -5    9.36    3.26 
   0 -12   5    7.17    4.50 
   0 -12   5   13.47    4.72 
  -1  12  -5   -1.81    2.14 
   1 -12   5    2.51    3.94 
   1 -12   5    8.76    4.41 
  -2  12  -5    1.79    2.00 
  -2  12  -5    5.73    3.05 
   2 -12   5    1.86    4.07 
   2 -12   5    4.24    3.60 
  -3  12  -5   -0.99    2.18 
  -3  12  -5    1.71    2.31 
   3 -12   5   -2.15    2.97 
   3 -12   5    0.02    2.84 
  -4  12  -5    0.10    2.54 
  -4  12  -5   -2.45    1.88 
   4 -12   5    3.25    3.22 
   4 -12   5    1.20    3.41 
  -5  12  -5    0.80    1.92 
  -5  12  -5    2.58    2.93 
   5 -12   5    5.30    3.41 
   5 -12   5    4.16    3.81 
  -6  12  -5    3.14    2.88 
  -6  12  -5   -3.61    1.72 
   6 -12   5    0.33    3.56 
   6 -12   5   -2.04    2.66 
  -7  12  -5    6.01    3.78 
  -7  12  -5   10.44    3.02 
   7 -12   5    9.06    4.00 
   7 -12   5    1.43    3.18 
  -8  12  -5   11.28    4.27 
  -8  12  -5   14.17    3.55 
   8 -12   5    9.83    4.16 
   8 -12   5   15.09    4.66 
   6  11  -5    0.90    2.30 
  -6 -11   5    7.94    5.05 
   5  11  -5    0.33    2.10 
  -5 -11   5    0.58    4.00 
   4  11  -5   -0.24    2.10 
  -4 -11   5    2.80    4.17 
   3  11  -5   17.07    3.86 
  -3 -11   5   13.23    5.08 
   2  11  -5   -1.20    2.10 
  -2 -11   5   -3.11    3.06 
   1  11  -5    9.53    3.14 
  -1 -11   5   13.10    5.00 
  -1 -11   5    5.12    4.32 
   0  11  -5    6.28    2.65 
   0 -11   5    0.56    3.83 
   0 -11   5    2.77    3.94 
  -1  11  -5   15.08    3.60 
   1 -11   5   16.57    4.72 
   1 -11   5   19.17    5.02 
  -2  11  -5   14.38    3.56 
  -2  11  -5   12.31    2.72 
   2 -11   5   18.09    5.12 
   2 -11   5   11.51    4.41 
  -3  11  -5    0.46    2.23 
  -3  11  -5    0.78    2.37 
   3 -11   5    2.51    3.58 
   3 -11   5    5.40    3.63 
  -4  11  -5    2.21    2.20 
  -4  11  -5    1.85    2.56 
   4 -11   5    4.11    3.50 
   4 -11   5    3.91    3.46 
  -5  11  -5    5.06    3.20 
  -5  11  -5    2.58    2.27 
   5 -11   5    2.50    3.10 
   5 -11   5    2.72    3.16 
  -6  11  -5   18.06    4.47 
  -6  11  -5   14.47    3.56 
   6 -11   5   19.27    4.74 
   6 -11   5   16.05    4.37 
  -7  11  -5    3.84    3.45 
  -7  11  -5    6.07    2.62 
   7 -11   5    4.28    3.04 
   7 -11   5    3.02    3.20 
  -8  11  -5   10.88    2.97 
  -8  11  -5   11.09    3.99 
   8 -11   5    5.28    3.68 
   8 -11   5   11.18    3.64 
  -9  11  -5    0.67    3.39 
   9 -11   5    1.63    3.14 
   9 -11   5   -4.85    2.44 
  10 -11   5    8.40    3.92 
   7  10  -5   -3.33    2.72 
   7  10  -5    0.06    2.33 
  -7 -10   5   -0.37    4.90 
   6  10  -5    8.89    4.14 
   6  10  -5    9.70    3.20 
  -6 -10   5    3.34    5.07 
   5  10  -5    0.19    2.28 
  -5 -10   5    2.64    4.57 
   4  10  -5   -1.78    2.03 
  -4 -10   5    0.17    3.39 
   3  10  -5    0.81    2.48 
  -3 -10   5   -3.16    3.39 
   2  10  -5    1.68    2.19 
  -2 -10   5    2.04    3.62 
   1  10  -5    1.88    2.27 
  -1 -10   5    8.30    4.28 
   0  10  -5   14.20    3.53 
   0 -10   5   10.63    4.02 
   0 -10   5   25.57    5.41 
  -1  10  -5    4.09    2.01 
  -1  10  -5    1.27    2.15 
   1 -10   5    0.27    3.40 
   1 -10   5    5.05    3.82 
  -2  10  -5    0.90    1.92 
  -2  10  -5    1.65    2.03 
   2 -10   5   -0.82    2.98 
   2 -10   5    4.39    3.17 
  -3  10  -5    2.75    2.10 
  -3  10  -5    2.56    2.39 
   3 -10   5    4.36    3.35 
   3 -10   5    3.92    3.19 
  -4  10  -5    2.11    2.09 
  -4  10  -5    1.08    2.32 
   4 -10   5    3.36    2.94 
   4 -10   5    2.53    3.08 
  -5  10  -5   92.96    6.03 
  -5  10  -5   80.17    6.26 
   5 -10   5   96.53    7.38 
   5 -10   5   84.51    6.69 
  -6  10  -5   31.84    5.17 
  -6  10  -5   33.12    3.99 
   6 -10   5   30.78    5.81 
   6 -10   5   30.86    4.90 
  -7  10  -5    0.88    2.21 
  -7  10  -5    0.61    2.87 
   7 -10   5    1.02    3.02 
   7 -10   5    1.49    2.81 
  -8  10  -5    1.59    3.30 
  -8  10  -5    0.41    1.93 
   8 -10   5   -0.20    2.60 
   8 -10   5    2.11    2.91 
  -9  10  -5    3.16    3.85 
   9 -10   5    0.39    2.54 
   9 -10   5    3.78    2.87 
 -10  10  -5   15.89    5.04 
  10 -10   5   11.73    4.47 
  10 -10   5    8.22    3.80 
   8   9  -5    4.19    2.60 
   8   9  -5   -0.24    3.22 
  -8  -9   5   -3.79    4.73 
   7   9  -5    3.95    3.59 
   7   9  -5   -0.01    2.16 
  -7  -9   5    2.54    4.48 
   6   9  -5   47.95    5.22 
   6   9  -5   50.38    6.61 
  -6  -9   5   47.33    7.62 
   5   9  -5    4.41    3.52 
   5   9  -5    0.99    2.35 
  -5  -9   5    1.35    4.80 
   4   9  -5    0.26    2.09 
   4   9  -5   -1.49    2.38 
  -4  -9   5   -0.52    3.93 
   3   9  -5   27.21    4.10 
  -3  -9   5   32.63    6.26 
   2   9  -5    8.44    2.78 
  -2  -9   5    6.46    4.09 
   1   9  -5   33.49    4.25 
  -1  -9   5   44.68    6.07 
   0   9  -5    0.71    1.40 
   0   9  -5    3.43    2.43 
   0  -9   5   -1.22    3.22 
   0  -9   5    3.38    3.68 
  -1   9  -5   18.48    3.84 
  -1   9  -5   25.55    3.14 
   1  -9   5   19.89    4.99 
   1  -9   5   22.27    4.97 
  -2   9  -5   13.51    3.10 
  -2   9  -5   20.58    3.75 
   2  -9   5   20.88    4.66 
   2  -9   5   14.25    4.38 
  -3   9  -5   12.21    3.27 
  -3   9  -5   23.47    3.88 
   3  -9   5   17.41    4.43 
   3  -9   5   15.34    4.74 
  -4   9  -5    6.29    3.18 
  -4   9  -5    2.55    2.33 
   4  -9   5    6.43    3.42 
   4  -9   5   -0.94    2.73 
  -5   9  -5    9.73    3.39 
  -5   9  -5   12.10    2.99 
   5  -9   5    6.24    3.07 
   5  -9   5   10.34    3.92 
  -6   9  -5   26.25    4.81 
  -6   9  -5   30.35    3.71 
   6  -9   5   26.63    4.32 
   6  -9   5   28.69    5.53 
  -7   9  -5   46.08    5.76 
  -7   9  -5   49.87    4.19 
   7  -9   5   46.77    5.09 
   7  -9   5   40.07    5.42 
  -8   9  -5   34.06    3.71 
  -8   9  -5   35.73    5.50 
   8  -9   5   35.39    4.89 
   8  -9   5   34.55    5.08 
  -9   9  -5   -0.15    3.03 
   9  -9   5    0.41    2.61 
   9  -9   5   -0.09    2.82 
 -10   9  -5   16.20    4.85 
  10  -9   5   12.07    4.61 
  10  -9   5   12.60    3.59 
 -11   9  -5   -5.11    3.27 
  11  -9   5    4.25    3.27 
  11  -9   5   -0.13    3.02 
   9   8  -5   -1.59    3.02 
   9   8  -5    1.11    2.28 
  -9  -8   5   -4.40    4.29 
   8   8  -5    8.01    4.02 
   8   8  -5    7.44    2.90 
  -8  -8   5   12.92    5.88 
   7   8  -5   -2.11    1.55 
   7   8  -5   -5.37    1.91 
  -7  -8   5    3.76    4.46 
   6   8  -5   10.59    3.97 
   6   8  -5    8.34    3.05 
  -6  -8   5    9.08    5.01 
   5   8  -5    0.38    2.10 
   5   8  -5    0.14    2.41 
  -5  -8   5    4.97    4.35 
   4   8  -5    2.91    2.33 
   4   8  -5    0.05    2.41 
  -4  -8   5    1.13    3.79 
   3   8  -5   30.91    4.09 
   3   8  -5   47.36    5.62 
  -3  -8   5   40.99    6.71 
   2   8  -5    1.81    2.10 
  -2  -8   5    2.86    3.87 
   1   8  -5   32.10    1.99 
   1   8  -5   22.77    3.99 
  -1  -8   5   27.78    5.85 
   0   8  -5   -0.19    1.97 
   0   8  -5    1.24    1.53 
   0  -8   5   -3.01    3.33 
  -1   8  -5   19.55    2.95 
  -1   8  -5   12.77    3.09 
   1  -8   5   16.90    4.60 
   1  -8   5    8.69    3.96 
  -2   8  -5    7.87    2.69 
  -2   8  -5    5.19    2.37 
   2  -8   5   12.25    3.74 
   2  -8   5    6.83    3.70 
  -3   8  -5    5.61    2.38 
  -3   8  -5    4.74    2.84 
   3  -8   5    4.24    3.09 
   3  -8   5   -2.19    2.49 
  -4   8  -5   30.28    4.58 
  -4   8  -5   18.58    3.50 
   4  -8   5   23.64    4.99 
   4  -8   5   19.37    4.14 
  -5   8  -5   24.92    3.54 
  -5   8  -5   29.62    4.81 
   5  -8   5   23.30    4.77 
   5  -8   5   28.15    4.52 
  -6   8  -5   78.28    6.47 
  -6   8  -5   84.98    5.20 
   6  -8   5   90.68    6.91 
   6  -8   5   95.32    6.30 
  -7   8  -5    3.16    1.89 
  -7   8  -5    5.46    3.48 
   7  -8   5    2.70    2.68 
   7  -8   5    1.63    2.52 
  -8   8  -5    2.26    1.84 
  -8   8  -5   -0.15    2.88 
   8  -8   5    0.14    2.43 
   8  -8   5    2.69    2.96 
  -9   8  -5   -0.13    3.14 
   9  -8   5    2.95    3.05 
   9  -8   5   -0.07    2.31 
 -10   8  -5    0.71    3.49 
  10  -8   5    3.03    3.04 
  10  -8   5    1.29    3.22 
 -11   8  -5   12.36    4.55 
  11  -8   5    2.83    3.81 
  11  -8   5    6.70    3.20 
 -12   8  -5   12.45    5.26 
  12  -8   5    8.80    3.48 
  12  -8   5    8.86    4.07 
   9   7  -5    8.61    4.28 
   9   7  -5    6.86    2.62 
  -9  -7   5    9.67    5.67 
   8   7  -5    4.33    2.48 
   8   7  -5   -0.57    2.89 
  -8  -7   5    9.32    5.55 
   7   7  -5    1.30    2.03 
   7   7  -5   -0.40    2.68 
  -7  -7   5    4.11    4.93 
   6   7  -5   68.72    6.76 
   6   7  -5   67.91    5.48 
  -6  -7   5   72.49    7.95 
   5   7  -5   16.55    4.30 
   5   7  -5   14.21    3.16 
  -5  -7   5   13.36    4.89 
   4   7  -5   -0.57    2.02 
   4   7  -5    3.05    2.97 
  -4  -7   5    3.41    4.38 
   3   7  -5    3.41    2.75 
   3   7  -5   -1.52    1.82 
  -3  -7   5    2.52    4.48 
   2   7  -5    9.00    3.33 
   2   7  -5    4.78    2.47 
  -2  -7   5    3.48    3.90 
   1   7  -5   22.87    1.74 
   1   7  -5   24.21    3.42 
  -1  -7   5   24.56    5.22 
   0   7  -5   11.45    2.05 
   0   7  -5   12.57    2.92 
   0  -7   5   10.18    4.15 
  -1   7  -5   39.86    3.41 
  -1   7  -5   36.96    4.02 
   1  -7   5   33.47    5.39 
   1  -7   5   41.81    4.88 
  -2   7  -5   44.49    4.00 
  -2   7  -5   45.23    4.04 
   2  -7   5   47.72    5.46 
   2  -7   5   42.73    4.64 
  -3   7  -5    3.02    2.48 
  -3   7  -5   -3.02    1.50 
   3  -7   5    5.87    2.96 
   3  -7   5    3.22    3.08 
  -4   7  -5    0.74    2.45 
  -4   7  -5   -0.47    1.81 
   4  -7   5    1.84    2.50 
   4  -7   5    3.76    2.84 
  -5   7  -5   19.30    4.23 
  -5   7  -5   26.58    3.30 
   5  -7   5   23.98    4.15 
   5  -7   5   27.12    4.44 
  -6   7  -5   25.28    4.90 
  -6   7  -5   27.58    3.39 
   6  -7   5   22.98    4.75 
   6  -7   5   25.80    4.03 
  -7   7  -5   24.78    3.14 
  -7   7  -5   14.73    4.15 
   7  -7   5   22.49    4.15 
   7  -7   5   19.85    4.58 
  -8   7  -5    9.77    2.32 
  -8   7  -5    7.55    3.74 
   8  -7   5   14.14    3.47 
   8  -7   5    9.21    3.37 
  -9   7  -5    3.89    3.26 
  -9   7  -5    1.05    1.56 
   9  -7   5   -0.06    2.43 
   9  -7   5    0.88    2.23 
 -10   7  -5    2.03    3.64 
  10  -7   5    4.99    3.07 
  10  -7   5    1.30    2.69 
 -11   7  -5   -2.50    2.80 
  11  -7   5   -1.20    2.80 
  11  -7   5    0.77    2.50 
 -12   7  -5    5.55    4.00 
  12  -7   5    9.14    3.72 
  12  -7   5    1.04    2.96 
  10   6  -5    8.45    4.58 
  10   6  -5   17.00    3.56 
 -10  -6   5    9.68    6.22 
   9   6  -5    3.97    3.77 
   9   6  -5   11.48    2.69 
  -9  -6   5    3.49    4.94 
   8   6  -5    2.96    3.08 
   8   6  -5    3.77    2.28 
  -8  -6   5    7.96    5.60 
   7   6  -5   16.84    4.46 
   7   6  -5   10.88    2.75 
  -7  -6   5    3.06    4.86 
   6   6  -5    4.93    3.07 
   6   6  -5   -0.11    1.76 
  -6  -6   5    0.33    3.87 
   5   6  -5   57.87    5.86 
   5   6  -5   70.56    5.24 
  -5  -6   5   65.51    7.49 
   4   6  -5    1.08    2.40 
   4   6  -5    3.22    2.18 
  -4  -6   5    1.61    4.13 
   3   6  -5    6.28    2.99 
   3   6  -5   11.45    2.90 
  -3  -6   5    6.71    4.45 
   2   6  -5    2.77    1.93 
   2   6  -5    2.63    2.36 
  -2  -6   5    5.80    4.09 
   1   6  -5    3.82    1.97 
   1   6  -5    3.35    2.47 
   1   6  -5    5.31    1.21 
  -1  -6   5    6.66    3.72 
   0   6  -5   69.90    4.78 
   0   6  -5   64.75    3.45 
   0  -6   5   69.82    6.00 
  -1   6  -5    5.97    1.90 
  -1   6  -5    0.77    1.62 
   1  -6   5    4.86    2.94 
  -2   6  -5   -0.18    1.69 
  -2   6  -5    1.96    1.96 
   2  -6   5    3.94    2.85 
   2  -6   5    2.74    2.39 
  -3   6  -5   21.65    3.08 
  -3   6  -5   22.19    3.39 
   3  -6   5   20.60    4.25 
   3  -6   5   24.29    3.81 
  -4   6  -5    2.28    2.30 
  -4   6  -5    2.58    1.91 
   4  -6   5    0.95    2.21 
   4  -6   5    3.36    2.70 
  -5   6  -5   11.11    3.44 
  -5   6  -5   15.92    2.98 
   5  -6   5    8.94    2.84 
   5  -6   5    4.43    2.99 
  -6   6  -5    4.54    3.03 
  -6   6  -5   -0.14    1.79 
   6  -6   5    3.88    2.94 
   6  -6   5   -0.79    2.05 
  -7   6  -5   11.52    3.82 
  -7   6  -5    4.16    1.92 
   7  -6   5   10.16    3.64 
   7  -6   5    9.72    3.17 
  -8   6  -5   48.55    5.90 
  -8   6  -5   53.43    3.72 
   8  -6   5   53.55    5.66 
   8  -6   5   54.76    4.95 
  -9   6  -5    0.60    2.78 
  -9   6  -5   -0.23    1.28 
   9  -6   5   -2.30    1.88 
   9  -6   5   -0.07    1.85 
 -10   6  -5   71.92    7.03 
  10  -6   5   75.40    6.12 
  10  -6   5   74.69    7.01 
 -11   6  -5    3.97    3.74 
  11  -6   5   -0.29    2.27 
  11  -6   5    2.08    3.18 
 -12   6  -5    5.42    3.79 
  12  -6   5   10.03    3.42 
  12  -6   5   14.10    4.42 
 -13   6  -5   35.85    7.01 
  13  -6   5   38.23    7.17 
  13  -6   5   44.08    5.88 
  10   5  -5   -1.81    2.95 
  10   5  -5   -2.34    1.54 
 -10  -5   5    0.69    4.81 
   9   5  -5    2.54    3.50 
   9   5  -5    1.65    2.11 
  -9  -5   5    0.51    5.00 
   8   5  -5   -4.13    2.26 
   8   5  -5    1.30    1.88 
  -8  -5   5    2.09    4.60 
   7   5  -5   11.40    3.75 
   7   5  -5    9.54    2.80 
  -7  -5   5   18.20    5.19 
   6   5  -5   27.06    3.50 
   6   5  -5   17.18    4.22 
  -6  -5   5   14.90    5.40 
   5   5  -5    3.72    2.30 
   5   5  -5    6.66    3.06 
  -5  -5   5    4.37    4.67 
   4   5  -5    2.94    2.54 
   4   5  -5    2.22    2.11 
  -4  -5   5   -0.33    3.53 
   3   5  -5   36.94    4.37 
   3   5  -5   41.58    3.87 
  -3  -5   5   47.20    6.01 
   2   5  -5   -0.52    1.81 
   2   5  -5   -1.23    1.56 
  -2  -5   5   -2.25    3.23 
   1   5  -5  148.33    4.42 
   1   5  -5  148.22    7.04 
   1   5  -5  147.64    6.78 
  -1  -5   5  134.99    7.95 
   0   5  -5    0.36    1.79 
   0   5  -5    1.27    1.35 
   0  -5   5   -1.62    2.51 
  -1   5  -5    0.86    1.53 
  -1   5  -5    5.73    2.11 
   1  -5   5   -0.63    2.55 
  -2   5  -5   28.42    3.20 
  -2   5  -5   24.22    2.96 
   2  -5   5   34.94    3.45 
   2  -5   5   28.55    4.10 
  -3   5  -5    1.55    2.03 
  -3   5  -5    4.37    1.86 
   3  -5   5    1.52    2.01 
   3  -5   5    1.99    2.33 
  -4   5  -5   63.98    4.67 
  -4   5  -5   58.83    3.92 
   4  -5   5   62.71    5.32 
   4  -5   5   60.43    3.95 
  -5   5  -5    1.73    2.63 
  -5   5  -5    1.81    1.65 
   5  -5   5    3.36    1.89 
   5  -5   5    9.06    3.18 
  -6   5  -5   26.94    3.05 
  -6   5  -5   31.50    4.53 
   6  -5   5   34.03    4.33 
   6  -5   5   29.98    3.51 
  -7   5  -5   15.81    4.08 
  -7   5  -5   17.21    2.82 
   7  -5   5   21.57    4.59 
   7  -5   5   20.70    3.40 
  -8   5  -5    5.02    3.60 
  -8   5  -5   -0.03    1.46 
   8  -5   5    0.65    2.65 
   8  -5   5    0.68    2.35 
  -9   5  -5    4.11    1.70 
  -9   5  -5    4.52    3.61 
   9  -5   5    6.00    3.37 
   9  -5   5    0.20    2.17 
 -10   5  -5   -0.46    2.53 
  10  -5   5    1.27    2.26 
  10  -5   5    0.52    2.70 
 -11   5  -5   16.73    4.76 
  11  -5   5   25.10    5.51 
  11  -5   5   20.27    4.37 
 -12   5  -5   14.57    5.05 
  12  -5   5   16.75    4.80 
  12  -5   5   20.13    4.50 
 -13   5  -5   -0.06    3.64 
  13  -5   5   -1.24    2.55 
  13  -5   5    1.25    3.12 
  11   4  -5   12.75    5.05 
 -11  -4   5    6.33    5.53 
  10   4  -5    4.26    2.19 
  10   4  -5   -0.89    2.79 
 -10  -4   5    0.28    4.03 
   9   4  -5    0.87    1.66 
   9   4  -5   -3.06    3.02 
  -9  -4   5   -2.01    3.64 
   8   4  -5   17.01    3.12 
   8   4  -5   19.62    4.98 
  -8  -4   5   15.68    5.55 
   7   4  -5    2.29    1.99 
   7   4  -5    8.35    3.71 
  -7  -4   5    6.22    4.35 
   6   4  -5    7.62    3.59 
   6   4  -5    6.56    2.16 
  -6  -4   5    1.35    4.03 
   5   4  -5   -3.21    1.42 
   5   4  -5    1.44    2.36 
  -5  -4   5    0.38    3.73 
   4   4  -5   -2.55    1.71 
   4   4  -5   -1.29    1.53 
  -4  -4   5   -1.38    3.29 
   3   4  -5   -2.19    1.56 
   3   4  -5   -0.17    1.52 
  -3  -4   5    4.26    3.29 
   2   4  -5    2.07    1.74 
   2   4  -5    1.30    1.83 
  -2  -4   5    2.11    3.04 
   1   4  -5   67.84    4.58 
   1   4  -5   67.28    4.33 
  -1  -4   5   74.17    5.99 
   0   4  -5   20.18    2.75 
   0   4  -5   22.14    2.72 
   0  -4   5   21.19    4.12 
  -1   4  -5    1.16    1.60 
   1  -4   5    3.38    2.45 
  -2   4  -5    0.81    1.57 
   2  -4   5   -1.36    1.76 
   2  -4   5    0.18    1.58 
  -3   4  -5   17.68    2.76 
   3  -4   5   22.70    3.85 
   3  -4   5   18.37    2.39 
  -4   4  -5   20.39    2.93 
  -4   4  -5   20.74    3.30 
   4  -4   5   19.71    3.46 
   4  -4   5   19.12    2.51 
  -5   4  -5   29.87    3.73 
  -5   4  -5   31.11    3.00 
   5  -4   5   28.81    2.81 
   5  -4   5   32.17    4.02 
  -6   4  -5    5.02    2.74 
  -6   4  -5    9.02    2.29 
   6  -4   5    5.68    2.68 
   6  -4   5    6.03    2.14 
  -7   4  -5    1.27    1.75 
  -7   4  -5   -0.12    2.55 
   7  -4   5    4.08    2.21 
   7  -4   5   -1.70    2.14 
  -8   4  -5   28.19    2.79 
  -8   4  -5   39.79    5.93 
   8  -4   5   30.08    4.45 
   8  -4   5   27.55    3.78 
  -9   4  -5   21.49    2.62 
  -9   4  -5   19.95    4.70 
   9  -4   5   23.11    4.92 
   9  -4   5   27.25    4.01 
 -10   4  -5    1.38    3.36 
  10  -4   5    2.78    2.89 
  10  -4   5    0.74    2.18 
 -11   4  -5    0.87    2.99 
  11  -4   5    4.05    2.88 
  11  -4   5    4.36    3.00 
 -12   4  -5    3.94    3.87 
  12  -4   5    1.95    2.82 
  12  -4   5    4.29    3.66 
 -13   4  -5   -1.75    3.62 
  13  -4   5    4.56    2.99 
  13  -4   5    1.52    3.44 
 -14   4  -5    7.26    4.93 
  14  -4   5    1.31    3.44 
  14  -4   5    2.55    3.53 
  11   3  -5    0.04    3.28 
 -11  -3   5    7.88    5.55 
  10   3  -5    0.13    3.09 
 -10  -3   5    6.80    5.25 
   9   3  -5   74.15    7.62 
   9   3  -5   75.70    4.84 
  -9  -3   5   85.92    9.24 
   8   3  -5   -0.24    2.86 
   8   3  -5    4.30    1.83 
  -8  -3   5    3.36    4.04 
   7   3  -5   19.26    4.70 
   7   3  -5   18.21    2.98 
  -7  -3   5   16.88    5.67 
   6   3  -5   25.58    4.96 
   6   3  -5   26.54    3.17 
  -6  -3   5   29.30    5.91 
  -6  -3   5   30.07    2.27 
   5   3  -5   20.73    2.94 
   5   3  -5   24.47    4.66 
  -5  -3   5   19.08    1.69 
  -5  -3   5   26.05    5.36 
   4   3  -5  143.42    6.45 
   4   3  -5  146.89    7.81 
  -4  -3   5  126.37    8.12 
  -4  -3   5  147.84    4.06 
   3   3  -5    4.38    1.87 
   3   3  -5    5.30    2.30 
  -3  -3   5    4.51    2.92 
  -3  -3   5    5.26    0.98 
   2   3  -5   13.47    2.44 
   2   3  -5   16.58    3.11 
  -2  -3   5   16.65    1.35 
  -2  -3   5   16.45    3.68 
   1   3  -5    2.08    1.64 
   1   3  -5    0.37    1.45 
  -1  -3   5    3.45    1.06 
  -1  -3   5    1.45    2.90 
   0   3  -5   20.92    2.54 
   0   3  -5   25.72    2.79 
   0  -3   5   22.37    3.47 
   0  -3   5   20.32    1.79 
  -1   3  -5   21.89    2.62 
   1  -3   5   17.30    1.93 
   1  -3   5   18.15    3.47 
  -2   3  -5    8.84    2.12 
   2  -3   5    4.28    2.45 
   2  -3   5    8.09    1.83 
  -3   3  -5    9.05    2.09 
   3  -3   5   14.14    1.88 
   3  -3   5    5.19    2.13 
  -4   3  -5  116.86    5.13 
   4  -3   5  117.49    6.33 
   4  -3   5  119.52    4.40 
  -5   3  -5   14.75    2.43 
   5  -3   5   13.02    2.96 
   5  -3   5   18.53    2.12 
  -6   3  -5   -1.83    1.25 
   6  -3   5   -0.47    1.46 
   6  -3   5    1.75    2.29 
  -7   3  -5   19.45    2.62 
  -7   3  -5   25.47    4.24 
   7  -3   5   23.57    3.09 
   7  -3   5   18.99    4.09 
  -8   3  -5   -1.25    1.43 
  -8   3  -5    1.58    2.90 
   8  -3   5    0.07    1.88 
   8  -3   5    2.99    2.58 
  -9   3  -5  124.17    4.97 
  -9   3  -5  112.88    8.12 
   9  -3   5  126.74    7.12 
   9  -3   5  113.64    7.79 
 -10   3  -5   -2.31    2.96 
  10  -3   5    1.71    2.69 
  10  -3   5    2.77    2.42 
 -11   3  -5   -1.68    3.00 
  11  -3   5    3.83    2.87 
  11  -3   5   -0.46    2.23 
 -12   3  -5    6.50    4.13 
  12  -3   5    1.58    3.21 
  12  -3   5    4.46    2.85 
 -13   3  -5   27.70    6.19 
  13  -3   5   12.98    4.38 
  13  -3   5   30.15    5.36 
 -14   3  -5    0.39    4.06 
  14  -3   5    5.43    3.52 
  14  -3   5    4.43    3.78 
  11   2  -5    3.02    3.77 
 -11  -2   5   -3.23    4.47 
  10   2  -5   -1.46    2.76 
 -10  -2   5   -0.74    4.54 
   9   2  -5    4.60    3.54 
   9   2  -5    5.48    2.00 
  -9  -2   5    6.06    5.12 
   8   2  -5   36.62    5.58 
   8   2  -5   31.83    3.18 
  -8  -2   5   39.17    3.29 
  -8  -2   5   31.53    6.23 
   7   2  -5   57.41    4.07 
   7   2  -5   72.06    6.98 
  -7  -2   5   57.21    7.38 
  -7  -2   5   63.33    3.78 
   6   2  -5   16.06    4.18 
   6   2  -5   11.82    2.56 
  -6  -2   5   11.32    2.07 
  -6  -2   5   24.70    5.86 
   5   2  -5    3.77    1.93 
   5   2  -5    5.83    2.76 
  -5  -2   5    2.27    3.31 
  -5  -2   5    3.09    1.40 
   4   2  -5  119.76    6.92 
   4   2  -5  111.35    5.36 
  -4  -2   5   95.51    6.71 
  -4  -2   5  113.68    3.90 
   3   2  -5   28.99    2.95 
   3   2  -5   34.50    3.67 
  -3  -2   5   31.72    1.96 
  -3  -2   5   29.13    4.42 
   2   2  -5  140.41    5.95 
   2   2  -5  147.72    6.49 
  -2  -2   5  141.21    7.42 
  -2  -2   5  153.31    4.45 
   1   2  -5  123.31    5.48 
   1   2  -5  114.09    5.19 
  -1  -2   5  123.52    3.97 
  -1  -2   5  115.48    6.32 
   0   2  -5    1.10    1.47 
   0   2  -5    3.19    1.35 
   0  -2   5    3.50    1.20 
   0  -2   5    4.75    2.26 
  -1   2  -5    7.38    1.92 
  -1   2  -5    5.64    1.39 
   1  -2   5    8.69    1.69 
   1  -2   5    8.48    2.63 
  -2   2  -5   56.76    3.65 
   2  -2   5   63.81    2.72 
   2  -2   5   55.57    3.18 
   2  -2   5   49.43    4.10 
  -3   2  -5   -0.54    1.29 
   3  -2   5   -0.95    1.59 
   3  -2   5    1.37    1.39 
   3  -2   5   -0.03    0.87 
  -4   2  -5   17.76    2.40 
   4  -2   5   18.89    3.03 
   4  -2   5   22.58    1.80 
  -5   2  -5    6.81    1.84 
   5  -2   5    4.65    2.13 
   5  -2   5    7.37    1.57 
  -6   2  -5   56.22    3.39 
   6  -2   5   57.80    3.46 
   6  -2   5   50.69    4.49 
  -7   2  -5    7.86    1.95 
   7  -2   5    8.17    2.87 
   7  -2   5    3.65    1.95 
  -8   2  -5   34.32    4.80 
  -8   2  -5   34.08    2.94 
   8  -2   5   39.86    4.70 
   8  -2   5   33.63    3.67 
  -9   2  -5   41.69    6.34 
  -9   2  -5   33.95    2.97 
   9  -2   5   31.11    4.02 
   9  -2   5   28.47    4.52 
 -10   2  -5    0.63    3.02 
  10  -2   5    3.95    3.19 
  10  -2   5    5.96    2.64 
 -11   2  -5   54.43    6.50 
  11  -2   5   39.78    5.42 
  11  -2   5   56.17    5.47 
 -12   2  -5    0.52    3.28 
  12  -2   5    2.01    2.54 
  12  -2   5    1.56    2.94 
 -13   2  -5    6.45    4.08 
  13  -2   5    6.08    3.35 
  13  -2   5   12.52    4.31 
 -14   2  -5   -5.44    3.25 
  14  -2   5    4.52    3.50 
  14  -2   5   -1.25    2.59 
  11   1  -5    5.23    4.46 
 -11  -1   5    3.53    4.88 
  10   1  -5   28.23    6.07 
 -10  -1   5   12.03    5.77 
   9   1  -5    2.07    2.88 
   9   1  -5    2.19    1.44 
  -9  -1   5    2.87    2.09 
  -9  -1   5   -1.73    3.94 
   8   1  -5    3.29    1.68 
   8   1  -5   -1.01    2.77 
  -8  -1   5    0.86    3.89 
  -8  -1   5    0.84    1.91 
   7   1  -5   13.55    4.46 
   7   1  -5   17.93    2.73 
  -7  -1   5   19.51    3.00 
  -7  -1   5   19.04    5.58 
   6   1  -5   10.31    3.59 
   6   1  -5    6.76    2.07 
  -6  -1   5    7.37    4.06 
  -6  -1   5    4.84    1.91 
   5   1  -5    2.36    2.49 
   5   1  -5   -1.45    1.34 
  -5  -1   5    2.61    1.48 
  -5  -1   5   -1.58    3.13 
   4   1  -5   -0.34    1.34 
   4   1  -5   -1.04    1.89 
  -4  -1   5    0.34    1.12 
  -4  -1   5    1.56    2.46 
   3   1  -5   54.11    4.21 
   3   1  -5   51.31    3.57 
  -3  -1   5   46.31    4.70 
  -3  -1   5   54.16    2.71 
   2   1  -5    1.93    1.72 
   2   1  -5    3.33    1.72 
  -2  -1   5    0.50    0.97 
  -2  -1   5   -0.82    2.12 
   1   1  -5   12.08    2.23 
   1   1  -5   14.38    2.30 
  -1  -1   5   12.60    1.54 
  -1  -1   5   16.56    3.42 
   0   1  -5   35.89    2.90 
   0   1  -5   45.14    2.80 
   0  -1   5   41.36    2.42 
   0  -1   5   40.95    3.78 
  -1   1  -5   37.26    3.08 
  -1   1  -5   40.20    2.19 
   1  -1   5   40.64    3.71 
   1  -1   5   45.67    2.73 
  -2   1  -5   75.30    3.78 
   2  -1   5   68.39    4.44 
   2  -1   5   65.54    3.52 
  -3   1  -5    0.60    1.51 
   3  -1   5   -1.22    1.08 
   3  -1   5    1.40    1.67 
  -4   1  -5    3.04    1.62 
   4  -1   5    3.83    0.97 
   4  -1   5    2.62    1.62 
   4  -1   5    2.58    1.99 
  -5   1  -5   39.03    2.88 
   5  -1   5   37.80    3.64 
   5  -1   5   34.45    2.30 
  -6   1  -5   73.48    3.68 
   6  -1   5   70.47    3.72 
   6  -1   5   60.07    4.70 
  -7   1  -5   36.25    2.81 
   7  -1   5   28.61    3.52 
   7  -1   5   31.20    3.11 
  -8   1  -5   41.35    3.09 
   8  -1   5   33.32    4.25 
   8  -1   5   41.57    3.91 
  -9   1  -5    3.04    1.82 
  -9   1  -5   -0.07    2.92 
   9  -1   5    3.16    2.40 
   9  -1   5   -0.07    2.07 
 -10   1  -5   26.86    2.74 
 -10   1  -5   24.80    5.19 
  10  -1   5   22.94    4.27 
  10  -1   5   14.09    3.95 
 -11   1  -5    2.59    3.09 
  11  -1   5    0.21    2.22 
  11  -1   5    3.34    2.83 
 -12   1  -5   13.26    4.61 
  12  -1   5   18.35    4.29 
  12  -1   5   15.89    4.65 
 -13   1  -5    7.11    4.64 
  13  -1   5    9.09    4.18 
  13  -1   5    3.40    2.89 
 -14   1  -5    6.86    4.40 
  14  -1   5   -0.01    2.91 
  14  -1   5   -1.77    2.89 
  11   0  -5    2.24    3.73 
 -11   0   5    1.26    2.21 
 -11   0   5    2.96    5.22 
  10   0  -5   15.54    5.08 
 -10   0   5   16.03    5.93 
 -10   0   5   17.84    3.49 
   9   0  -5    1.03    2.78 
  -9   0   5    5.13    2.24 
  -9   0   5    0.07    4.00 
   8   0  -5    0.38    2.86 
   8   0  -5    6.75    1.70 
  -8   0   5   13.17    5.21 
  -8   0   5    9.27    2.47 
   7   0  -5   -0.51    2.77 
   7   0  -5    0.31    1.51 
  -7   0   5   -1.10    4.26 
  -7   0   5    1.26    2.05 
   6   0  -5   81.92    4.27 
   6   0  -5   87.39    6.76 
  -6   0   5   65.87    4.30 
  -6   0   5   68.65    7.08 
   5   0  -5   45.24    3.29 
   5   0  -5   41.34    4.69 
  -5   0   5   47.67    3.35 
  -5   0   5   55.19    5.92 
   4   0  -5   47.49    3.30 
   4   0  -5   40.61    4.18 
  -4   0   5   32.65    4.60 
   3   0  -5   56.52    4.41 
   3   0  -5   59.15    3.55 
  -3   0   5   54.11    4.84 
  -3   0   5   52.61    2.95 
   2   0  -5   20.53    2.46 
   2   0  -5   21.62    2.75 
  -2   0   5   21.75    3.66 
  -2   0   5   22.17    2.03 
   1   0  -5  140.19    5.37 
   1   0  -5  137.38    5.55 
  -1   0   5  134.57    4.65 
  -1   0   5  146.18    6.36 
   0   0  -5    9.81    1.83 
   0   0  -5    8.20    2.02 
   0   0   5    7.06    1.52 
   0   0   5    9.82    2.43 
  -1   0  -5    1.14    0.90 
  -1   0  -5    1.17    1.45 
   1   0   5   -1.09    1.00 
   1   0   5   -0.24    1.81 
  -2   0  -5   97.96    4.41 
   2   0   5   99.34    4.30 
   2   0   5  106.92    5.16 
  -3   0  -5   15.24    2.26 
   3   0   5   18.79    3.01 
   3   0   5   14.66    2.12 
  -4   0  -5  177.18    6.00 
   4   0   5  167.41    6.55 
   4   0   5  164.42    6.89 
   4   0   5  175.38    4.58 
  -5   0  -5    5.69    1.73 
   5   0   5    4.21    1.75 
   5   0   5    5.68    2.18 
   5   0   5    5.14    1.35 
  -6   0  -5   17.39    2.32 
   6   0   5   15.46    3.06 
   6   0   5   21.60    2.35 
  -7   0  -5  118.94    4.81 
   7   0   5  123.65    5.56 
   7   0   5  101.56    6.29 
  -8   0  -5    3.02    1.76 
   8   0   5    2.38    1.97 
   8   0   5    2.34    2.42 
  -9   0  -5  380.90   10.48 
   9   0   5  395.32   13.06 
   9   0   5  362.34   13.94 
 -10   0  -5   11.01    2.26 
 -10   0  -5   13.26    4.20 
  10   0   5    4.61    2.81 
  10   0   5   12.48    3.73 
 -11   0  -5   18.21    4.77 
  11   0   5   13.60    3.96 
  11   0   5    9.93    3.32 
 -12   0  -5   33.26    6.31 
  12   0   5   34.38    5.22 
  12   0   5   36.37    4.99 
 -13   0  -5    1.12    3.36 
  13   0   5    1.97    3.18 
  13   0   5   -1.55    2.42 
 -14   0  -5   43.02    7.18 
  14   0   5   42.09    6.00 
  14   0   5   46.98    6.13 
  12  -1  -5   -1.19    2.84 
 -12   1   5    0.62    5.15 
 -12   1   5    6.22    2.91 
  11  -1  -5    0.61    3.12 
 -11   1   5   -2.24    4.04 
 -11   1   5   -0.30    2.13 
  10  -1  -5    2.02    3.22 
 -10   1   5    1.43    2.44 
 -10   1   5    1.54    4.50 
   9  -1  -5   12.48    4.59 
  -9   1   5   13.85    5.29 
  -9   1   5    7.75    2.67 
   8  -1  -5    0.31    1.12 
   8  -1  -5    4.53    3.27 
  -8   1   5   12.07    5.14 
  -8   1   5    2.75    2.25 
   7  -1  -5   20.05    4.73 
   7  -1  -5   21.31    2.45 
  -7   1   5   22.89    3.49 
  -7   1   5   25.22    6.07 
   6  -1  -5   43.46    3.13 
   6  -1  -5   41.23    5.24 
  -6   1   5   39.70    3.72 
  -6   1   5   48.99    6.36 
   5  -1  -5    1.13    1.58 
   5  -1  -5   10.41    3.41 
  -5   1   5    5.25    1.99 
  -5   1   5    5.46    3.38 
   4  -1  -5   68.72    3.76 
   4  -1  -5   70.97    5.46 
  -4   1   5   67.11    5.58 
  -4   1   5   76.97    3.94 
   3  -1  -5    3.77    1.64 
   3  -1  -5   -0.34    1.75 
  -3   1   5   -0.74    1.16 
  -3   1   5    2.76    2.14 
   2  -1  -5   34.41    3.30 
   2  -1  -5   38.48    2.80 
  -2   1   5   39.66    3.75 
  -2   1   5   31.88    2.47 
   1  -1  -5  797.82   18.62 
   1  -1  -5  785.36   19.19 
  -1   1   5  798.60   18.38 
  -1   1   5  786.36   19.70 
   0  -1  -5   16.41    2.15 
   0  -1  -5   16.14    2.29 
   0   1   5   17.52    2.49 
   0   1   5   14.61    1.97 
  -1  -1  -5  381.50    9.24 
  -1  -1  -5  367.44   10.18 
   1   1   5  374.08   10.75 
   1   1   5  381.58   10.08 
  -2  -1  -5  152.80    4.06 
  -2  -1  -5  151.87    5.55 
   2   1   5  161.03    6.07 
   2   1   5  154.56    5.50 
  -3  -1  -5   18.47    1.49 
  -3  -1  -5   21.24    2.33 
   3   1   5   18.01    2.29 
   3   1   5   16.99    2.55 
  -4  -1  -5    1.52    1.29 
   4   1   5    1.47    1.61 
   4   1   5    0.92    0.86 
   4   1   5    0.70    1.28 
  -5  -1  -5    1.29    1.33 
   5   1   5   -0.28    1.57 
   5   1   5    0.22    1.10 
   5   1   5   -0.02    1.39 
  -6  -1  -5   87.87    4.14 
   6   1   5   90.99    5.31 
   6   1   5   90.57    5.07 
   6   1   5   95.64    4.51 
  -7  -1  -5  111.11    4.70 
   7   1   5  111.86    6.33 
   7   1   5  106.97    5.30 
  -8  -1  -5    0.31    1.59 
   8   1   5    3.20    2.12 
   8   1   5    8.53    3.03 
  -9  -1  -5   -0.51    1.40 
   9   1   5    0.93    2.47 
   9   1   5    2.42    2.15 
 -10  -1  -5    9.00    2.19 
  10   1   5   14.84    4.01 
  10   1   5    2.29    2.42 
 -11  -1  -5    2.99    3.02 
 -11  -1  -5    2.17    1.55 
  11   1   5    0.22    2.40 
  11   1   5   -1.77    2.00 
 -12  -1  -5   10.09    4.15 
  12   1   5   18.19    4.39 
  12   1   5   19.10    5.03 
 -13  -1  -5   -4.40    3.03 
  13   1   5    0.09    2.60 
  13   1   5    1.67    3.04 
 -14  -1  -5    2.64    4.10 
  14   1   5   23.71    5.45 
  14   1   5   13.45    4.78 
  12  -2  -5    3.93    3.74 
 -12   2   5    3.62    2.85 
 -12   2   5    7.62    5.52 
  11  -2  -5    4.38    3.73 
 -11   2   5    0.00    2.21 
 -11   2   5    5.23    4.57 
  10  -2  -5   27.06    6.05 
 -10   2   5   31.40    4.61 
 -10   2   5   28.71    6.50 
   9  -2  -5   13.70    4.43 
  -9   2   5   17.23    3.58 
  -9   2   5   14.60    5.03 
   8  -2  -5    3.15    3.24 
  -8   2   5    1.31    3.66 
  -8   2   5    1.86    2.28 
   7  -2  -5   33.07    5.22 
   7  -2  -5   35.94    2.76 
  -7   2   5   29.36    6.03 
  -7   2   5   27.62    3.94 
   6  -2  -5   31.10    4.69 
   6  -2  -5   36.60    2.92 
  -6   2   5   42.61    5.69 
  -6   2   5   36.71    3.74 
   5  -2  -5   92.29    4.22 
   5  -2  -5   93.16    6.33 
  -5   2   5   85.33    4.92 
  -5   2   5   92.79    7.00 
   4  -2  -5    3.53    2.33 
   4  -2  -5    3.66    1.57 
  -4   2   5    1.19    2.41 
  -4   2   5   -1.04    1.33 
   3  -2  -5    5.00    1.63 
   3  -2  -5    4.88    2.34 
  -3   2   5    5.34    1.69 
  -3   2   5    7.10    2.63 
   2  -2  -5   11.76    1.98 
   2  -2  -5    8.11    2.33 
  -2   2   5   14.17    1.99 
  -2   2   5   10.01    2.57 
   1  -2  -5   -1.32    1.38 
   1  -2  -5    0.04    1.26 
  -1   2   5    1.12    1.77 
  -1   2   5    0.16    1.09 
   0  -2  -5    6.88    1.84 
   0  -2  -5    5.96    1.63 
   0   2   5    8.36    1.72 
   0   2   5    6.12    1.82 
  -1  -2  -5   12.06    1.86 
  -1  -2  -5   13.19    1.92 
   1   2   5   13.80    1.95 
   1   2   5   15.50    2.29 
  -2  -2  -5   67.24    2.94 
   2   2   5   61.61    3.46 
   2   2   5   65.68    3.60 
  -3  -2  -5   57.40    2.90 
   3   2   5   52.68    3.33 
   3   2   5   48.93    3.32 
   4   2   5   14.93    2.22 
   4   2   5   18.09    2.39 
   5   2   5   51.78    3.63 
   5   2   5   54.01    3.18 
   5   2   5   47.52    3.58 
   6   2   5   -1.08    1.50 
   6   2   5   -0.63    1.52 
   6   2   5    0.57    1.34 
   7   2   5   22.64    3.14 
   7   2   5   18.92    2.78 
   7   2   5   23.27    3.32 
   8   2   5   28.01    4.01 
   8   2   5   24.61    3.44 
   9   2   5   -0.33    2.00 
   9   2   5    4.69    2.86 
  10   2   5    9.83    3.66 
  10   2   5    9.36    3.26 
  11   2   5    0.08    2.42 
  11   2   5    1.27    2.19 
 -12  -2  -5    0.37    2.93 
  12   2   5    3.90    3.07 
  12   2   5    1.62    2.86 
 -13  -2  -5   -1.81    3.31 
  13   2   5    1.33    2.77 
  13   2   5   -3.90    2.42 
 -14  -2  -5   14.92    5.06 
  14   2   5    3.11    3.82 
  14   2   5    9.03    4.04 
  11  -3  -5   -2.75    2.74 
 -11   3   5    4.84    3.07 
 -11   3   5    2.47    4.58 
  10  -3  -5    4.09    3.59 
 -10   3   5   -0.33    3.89 
 -10   3   5    5.62    2.85 
   9  -3  -5   17.35    4.80 
  -9   3   5    9.58    4.59 
  -9   3   5   30.65    4.45 
   8  -3  -5    2.75    2.87 
  -8   3   5   -2.12    1.97 
  -8   3   5    1.20    3.47 
   7  -3  -5    0.28    1.37 
   7  -3  -5    3.05    2.97 
  -7   3   5    0.62    2.38 
  -7   3   5   -5.26    3.24 
   6  -3  -5   38.97    2.95 
   6  -3  -5   36.13    5.09 
  -6   3   5   33.00    3.87 
  -6   3   5   34.32    5.63 
   5  -3  -5   21.25    4.23 
   5  -3  -5   15.35    2.28 
  -5   3   5   22.75    3.33 
  -5   3   5   22.89    4.39 
   4  -3  -5   92.37    4.13 
   4  -3  -5  103.12    6.34 
  -4   3   5  102.61    6.29 
  -4   3   5   95.25    4.94 
   3  -3  -5   44.70    2.96 
   3  -3  -5   42.28    4.08 
  -3   3   5   49.02    4.17 
  -3   3   5   38.92    3.13 
   2  -3  -5    2.58    1.99 
   2  -3  -5    6.49    1.68 
  -2   3   5    1.14    1.82 
  -2   3   5    2.37    1.43 
   1  -3  -5    6.59    2.16 
   1  -3  -5    7.06    1.65 
  -1   3   5    9.43    2.08 
  -1   3   5    4.37    1.56 
   0  -3  -5   15.87    2.47 
   0   3   5   16.21    2.08 
   0   3   5   17.68    2.18 
  -1  -3  -5   60.18    3.37 
   1   3   5   57.03    3.16 
   1   3   5   56.97    3.34 
  -2  -3  -5   98.92    4.28 
   2   3   5   99.45    4.43 
   2   3   5   95.45    3.99 
  -3  -3  -5   43.08    3.12 
   3   3   5   42.84    2.80 
   3   3   5   39.19    2.94 
   4   3   5   61.48    3.57 
   4   3   5   55.47    3.60 
   5   3   5   12.09    2.46 
   5   3   5   14.30    2.21 
   5   3   5   15.63    2.75 
   6   3   5   30.66    3.34 
   6   3   5   36.03    3.45 
   6   3   5   33.14    3.25 
   7   3   5    0.41    1.79 
   7   3   5   -1.48    1.51 
   7   3   5    0.10    2.07 
   8   3   5   -0.77    2.28 
   8   3   5   -0.49    1.97 
   8   3   5   -0.71    1.93 
   9   3   5  126.27    7.78 
   9   3   5  133.45    7.33 
  10   3   5    2.61    2.60 
  10   3   5    0.09    2.37 
  11   3   5    5.55    3.06 
  11   3   5    7.11    3.13 
 -12  -3  -5    4.82    3.31 
  12   3   5    4.60    3.10 
  12   3   5    6.32    3.49 
 -13  -3  -5    2.31    3.66 
  13   3   5    5.58    3.85 
  13   3   5    6.69    3.60 
 -14  -3  -5   27.16    5.98 
  14   3   5   15.04    4.71 
  14   3   5   12.22    4.96 
  11  -4  -5    0.73    2.84 
 -11   4   5    1.08    2.90 
 -11   4   5    4.70    4.84 
  10  -4  -5   10.70    4.76 
 -10   4   5    3.31    2.91 
   9  -4  -5   11.46    4.43 
  -9   4   5   15.41    3.74 
   8  -4  -5   -0.96    2.29 
  -8   4   5    0.06    2.19 
   7  -4  -5   25.04    2.30 
   7  -4  -5   18.69    4.64 
  -7   4   5   32.33    4.39 
   6  -4  -5    5.73    3.08 
   6  -4  -5    3.36    1.72 
  -6   4   5    3.11    2.39 
   5  -4  -5  124.80    7.67 
   5  -4  -5  133.22    4.96 
  -5   4   5  112.94    6.16 
  -5   4   5  130.72    7.42 
   4  -4  -5    1.49    1.47 
   4  -4  -5   -1.99    2.11 
  -4   4   5   -0.04    1.72 
  -4   4   5    1.70    2.27 
   3  -4  -5   15.47    3.33 
   3  -4  -5   19.36    2.27 
  -3   4   5   13.51    2.53 
  -3   4   5   18.60    3.28 
   2  -4  -5   58.26    3.37 
   2  -4  -5   56.19    4.34 
  -2   4   5   65.14    3.84 
  -2   4   5   66.60    3.91 
   1  -4  -5  104.27    5.37 
  -1   4   5  108.65    4.47 
  -1   4   5  110.61    4.84 
   0  -4  -5   31.62    3.12 
   0   4   5   30.82    2.69 
   0   4   5   34.14    2.26 
  -1  -4  -5    3.50    1.68 
   1   4   5   -0.77    1.00 
   1   4   5    0.32    1.03 
  -2  -4  -5   17.35    2.75 
   2   4   5   14.53    2.14 
   2   4   5   14.83    1.61 
   2   4   5   11.15    2.10 
  -3  -4  -5   29.79    3.23 
   3   4   5   30.79    2.73 
   3   4   5   30.58    2.76 
   3   4   5   30.06    2.34 
   4   4   5   17.67    2.30 
   4   4   5   18.30    2.32 
   4   4   5   16.34    2.38 
   5   4   5    0.05    1.51 
   5   4   5    1.40    1.46 
   5   4   5    1.45    1.39 
   6   4   5   17.93    2.88 
   6   4   5   21.22    3.01 
   6   4   5   20.50    2.73 
   6   4   5   18.84    2.57 
   7   4   5   24.15    3.31 
   7   4   5   18.81    2.71 
   7   4   5   22.32    3.35 
   7   4   5   24.80    3.57 
   8   4   5   34.77    4.16 
   8   4   5   38.38    3.50 
   8   4   5   38.36    4.25 
   8   4   5   31.87    3.73 
   9   4   5   10.81    3.18 
   9   4   5   14.34    2.88 
   9   4   5   18.94    4.14 
  10   4   5   13.07    3.78 
  10   4   5   14.44    3.60 
  11   4   5   23.89    4.69 
  11   4   5   16.00    4.17 
  12   4   5   20.90    5.16 
  12   4   5   21.83    4.77 
 -13  -4  -5    7.04    4.10 
  13   4   5    3.93    3.67 
  13   4   5   10.26    3.89 
 -14  -4  -5    4.14    3.95 
  14   4   5    0.97    3.13 
  11  -5  -5   15.74    5.45 
 -11   5   5   18.28    4.27 
  10  -5  -5   -0.34    2.95 
 -10   5   5    6.12    3.37 
   9  -5  -5   -2.39    2.24 
  -9   5   5   -1.47    2.34 
   8  -5  -5   -1.41    2.44 
  -8   5   5   -1.97    1.97 
   7  -5  -5   -0.76    1.29 
   7  -5  -5    0.35    2.89 
  -7   5   5   -0.08    2.35 
   6  -5  -5    9.83    3.73 
   6  -5  -5    9.25    2.07 
  -6   5   5    1.54    2.49 
   5  -5  -5   42.78    5.06 
   5  -5  -5   61.36    3.56 
  -5   5   5   48.98    4.58 
   4  -5  -5   67.26    3.67 
   4  -5  -5   57.33    5.45 
  -4   5   5   67.35    4.68 
  -4   5   5   72.99    5.02 
   3  -5  -5   76.85    5.56 
  -3   5   5   61.52    4.28 
  -3   5   5   72.39    4.58 
   2  -5  -5    7.94    2.73 
  -2   5   5   10.16    2.15 
  -2   5   5    7.94    2.12 
   1  -5  -5   69.62    4.69 
  -1   5   5   71.47    3.28 
  -1   5   5   70.37    4.07 
   0  -5  -5   36.53    3.59 
   0   5   5   34.77    2.95 
   0   5   5   35.40    2.95 
   0   5   5   33.58    1.93 
  -1  -5  -5    5.19    2.16 
   1   5   5    6.12    1.69 
   1   5   5    4.94    0.90 
   1   5   5    4.19    1.73 
  -2  -5  -5   32.57    3.46 
   2   5   5   36.07    2.98 
   2   5   5   37.95    3.07 
   2   5   5   35.67    1.96 
  -3  -5  -5    8.29    2.59 
   3   5   5   10.80    2.16 
   3   5   5    9.96    2.23 
   3   5   5    9.58    1.66 
   4   5   5   16.18    2.12 
   4   5   5   18.67    2.46 
   4   5   5   21.20    2.69 
   5   5   5   98.88    4.91 
   5   5   5   99.01    5.04 
   5   5   5   96.04    5.11 
   6   5   5    4.10    1.91 
   6   5   5    7.26    2.18 
   6   5   5    4.04    2.36 
   6   5   5    6.93    2.20 
   7   5   5   20.39    3.39 
   7   5   5   26.89    3.54 
   7   5   5   23.19    3.59 
   7   5   5   25.48    3.08 
   8   5   5    3.51    2.36 
   8   5   5    0.25    2.21 
   8   5   5    1.05    2.05 
   8   5   5    0.93    1.97 
   9   5   5   28.73    4.37 
   9   5   5   25.51    4.22 
   9   5   5   23.97    3.75 
   9   5   5   19.63    3.36 
  10   5   5   34.74    4.64 
  10   5   5   30.63    4.72 
  10   5   5   42.54    3.87 
  11   5   5   17.60    4.61 
  11   5   5   19.45    4.55 
  11   5   5   26.35    3.30 
  12   5   5   -2.50    2.69 
  12   5   5    1.28    2.62 
 -13  -5  -5    2.22    3.17 
  13   5   5    0.73    2.91 
  11  -6  -5    0.44    3.39 
 -11   6   5    2.55    3.23 
  10  -6  -5   11.79    4.58 
 -10   6   5    8.02    3.58 
   9  -6  -5    1.89    3.33 
  -9   6   5    2.33    2.75 
   8  -6  -5   42.08    5.95 
  -8   6   5   36.64    4.77 
   7  -6  -5   -0.14    2.54 
  -7   6   5    4.68    2.64 
   6  -6  -5   17.32    2.54 
   6  -6  -5   12.70    4.28 
  -6   6   5   12.09    3.20 
   5  -6  -5    4.46    3.15 
   5  -6  -5    8.93    1.98 
  -5   6   5    6.94    2.75 
   4  -6  -5   30.20    4.58 
  -4   6   5   36.06    3.92 
   3  -6  -5  124.97    7.10 
  -3   6   5  124.45    6.20 
  -3   6   5  134.63    5.92 
   2  -6  -5    8.00    2.86 
  -2   6   5    8.13    2.01 
  -2   6   5    7.54    2.23 
   1  -6  -5   50.09    4.58 
  -1   6   5   56.22    2.47 
  -1   6   5   45.62    3.50 
  -1   6   5   45.53    3.34 
   0  -6  -5    0.32    2.07 
   0   6   5    0.10    1.23 
   0   6   5   -1.28    1.22 
  -1  -6  -5   18.05    3.27 
   1   6   5   11.07    2.36 
   1   6   5   14.24    2.55 
  -2  -6  -5   70.47    4.98 
   2   6   5   64.31    4.10 
   2   6   5   59.14    3.85 
  -3  -6  -5   51.28    4.60 
   3   6   5   50.72    3.55 
   3   6   5   52.54    2.61 
   3   6   5   54.51    3.86 
   4   6   5   -1.04    1.08 
   4   6   5   -0.39    1.38 
   4   6   5   -2.59    1.18 
   5   6   5   57.53    4.13 
   5   6   5   52.83    3.80 
   5   6   5   57.86    3.78 
   6   6   5   -1.44    1.53 
   6   6   5    1.49    1.74 
   6   6   5    1.36    1.69 
   7   6   5   -0.70    1.85 
   7   6   5   -0.42    1.85 
   7   6   5    0.33    1.82 
   7   6   5    3.09    2.27 
   8   6   5   29.31    4.29 
   8   6   5   23.57    4.34 
   8   6   5   19.83    3.57 
   8   6   5   25.55    3.86 
   9   6   5   45.18    5.19 
   9   6   5   42.11    4.25 
   9   6   5   42.52    4.98 
   9   6   5   36.38    3.98 
  10   6   5    2.99    2.72 
  10   6   5    1.98    2.71 
  10   6   5    2.62    2.25 
  11   6   5   11.78    3.72 
  11   6   5    7.96    2.65 
  12   6   5    3.94    3.06 
  12   6   5   -1.44    1.89 
 -13  -6  -5    2.22    3.07 
  13   6   5    5.21    3.75 
  11  -7  -5    3.20    3.45 
 -11   7   5    7.15    3.28 
  10  -7  -5   -1.78    2.56 
 -10   7   5   -0.75    2.43 
   9  -7  -5   -2.30    3.24 
  -9   7   5   -0.48    2.60 
   8  -7  -5    0.80    2.70 
  -8   7   5   -0.52    2.43 
   7  -7  -5    8.18    3.57 
  -7   7   5    8.04    2.88 
   6  -7  -5   -1.13    2.78 
   6  -7  -5    1.58    1.69 
  -6   7   5    4.56    2.74 
   5  -7  -5   57.00    6.49 
  -5   7   5   53.60    5.22 
   4  -7  -5    2.40    3.08 
  -4   7   5   -2.26    1.80 
   3  -7  -5   35.70    4.75 
  -3   7   5   35.20    3.42 
  -3   7   5   32.05    3.72 
   2  -7  -5   64.25    5.50 
  -2   7   5   60.32    4.31 
  -2   7   5   59.81    3.27 
  -2   7   5   63.15    3.99 
   1  -7  -5    0.74    2.47 
  -1   7   5    2.01    1.40 
  -1   7   5    1.50    1.67 
   0  -7  -5  110.26    6.40 
   0   7   5  105.55    5.29 
   0   7   5  107.85    5.36 
  -1  -7  -5   -2.62    1.91 
   1   7   5    0.67    1.44 
   1   7   5    1.81    1.59 
  -2  -7  -5    1.89    2.37 
   2   7   5    0.19    1.53 
   2   7   5   -1.11    1.26 
  -3  -7  -5   42.93    4.91 
   3   7   5   47.74    3.63 
   3   7   5   43.73    3.64 
  -4  -7  -5   13.69    4.14 
   4   7   5   13.14    2.68 
   4   7   5   16.32    2.85 
   5   7   5   95.74    5.17 
   5   7   5   92.78    5.43 
   6   7   5   14.46    2.97 
   6   7   5    8.53    2.48 
   7   7   5    8.38    2.75 
   7   7   5    5.43    2.38 
   8   7   5    9.41    3.44 
   8   7   5    4.79    2.44 
   8   7   5    4.92    2.56 
   9   7   5    3.93    2.30 
   9   7   5    3.67    2.91 
   9   7   5    4.65    2.50 
  10   7   5   14.76    4.02 
  10   7   5   13.10    3.23 
  11   7   5    5.64    2.71 
  11   7   5    0.47    2.85 
  12   7   5    6.84    3.47 
  12   7   5    2.17    2.37 
 -13  -7  -5   24.59    4.90 
  13   7   5   27.31    5.98 
  13   7   5   16.94    3.99 
  10  -8  -5    4.36    3.46 
 -10   8   5    1.10    2.66 
   9  -8  -5   12.89    4.64 
  -9   8   5    7.51    3.44 
   8  -8  -5   19.87    5.28 
  -8   8   5   18.24    4.18 
   7  -8  -5   19.16    4.71 
  -7   8   5   22.93    4.34 
   6  -8  -5   11.73    4.13 
   6  -8  -5   16.71    2.49 
  -6   8   5   10.79    3.34 
   5  -8  -5    4.36    3.64 
  -5   8   5    0.69    2.55 
   4  -8  -5    2.41    3.08 
  -4   8   5    3.00    2.55 
   3  -8  -5    9.05    3.72 
  -3   8   5    8.61    2.36 
  -3   8   5    8.51    2.69 
  -3   8   5    6.46    2.24 
   2  -8  -5   57.58    5.89 
  -2   8   5   48.76    4.23 
  -2   8   5   54.12    2.83 
  -2   8   5   55.71    4.03 
   1  -8  -5   38.60    5.07 
  -1   8   5   29.78    3.37 
  -1   8   5   37.51    3.58 
   0  -8  -5   22.06    4.21 
   0   8   5   18.93    3.03 
   0   8   5   15.78    2.88 
  -1  -8  -5   30.66    4.78 
   1   8   5   24.54    3.19 
   1   8   5   24.11    2.99 
  -2  -8  -5   13.92    3.88 
   2   8   5    9.72    2.45 
   2   8   5   15.25    2.71 
  -3  -8  -5   82.20    6.64 
  -3  -8  -5   80.04    3.41 
   3   8   5   70.13    4.84 
   3   8   5   76.91    4.57 
  -4  -8  -5    6.02    3.58 
  -4  -8  -5    2.73    2.10 
   4   8   5    6.14    2.23 
   4   8   5    9.05    2.44 
   5   8   5   34.23    3.51 
   5   8   5   37.56    3.82 
   6   8   5   37.11    4.06 
   6   8   5   40.11    3.78 
   7   8   5   -0.60    1.76 
   7   8   5    0.73    1.70 
   8   8   5    3.95    2.41 
   8   8   5    2.64    2.11 
   9   8   5    2.72    3.02 
   9   8   5    2.75    2.25 
   9   8   5    2.28    2.15 
  10   8   5    3.74    2.51 
  10   8   5   -0.29    2.76 
  10   8   5   10.40    3.22 
  11   8   5   -0.27    2.26 
  11   8   5    6.45    3.64 
  12   8   5   -0.26    2.40 
  12   8   5   -1.58    2.46 
  10  -9  -5    5.30    3.81 
 -10   9   5    1.39    3.03 
   9  -9  -5   13.61    4.60 
  -9   9   5    6.49    3.71 
   8  -9  -5    6.79    4.07 
  -8   9   5   -0.55    2.59 
   7  -9  -5   46.96    6.51 
  -7   9   5   35.26    4.89 
   6  -9  -5    8.05    4.18 
  -6   9   5    1.47    2.56 
   5  -9  -5   16.40    4.61 
  -5   9   5   16.17    3.60 
   4  -9  -5    8.31    4.01 
  -4   9   5   15.90    3.52 
  -4   9   5   10.71    2.60 
   3  -9  -5   -2.50    2.98 
  -3   9   5    2.66    2.18 
  -3   9   5    5.82    1.93 
  -3   9   5    4.27    2.03 
   2  -9  -5   12.18    4.29 
  -2   9   5   12.54    2.77 
  -2   9   5    8.26    2.66 
   1  -9  -5    8.66    3.80 
  -1   9   5    7.02    2.61 
  -1   9   5    9.46    2.42 
   0  -9  -5    4.44    3.46 
   0   9   5    3.40    1.91 
   0   9   5    5.46    2.15 
  -1  -9  -5    1.14    3.18 
   1   9   5    0.39    1.83 
   1   9   5   -0.57    1.53 
  -2  -9  -5   52.36    5.79 
   2   9   5   46.67    3.83 
   2   9   5   52.49    4.43 
  -3  -9  -5    8.15    4.03 
  -3  -9  -5    9.89    1.81 
   3   9   5    8.14    2.56 
   3   9   5    5.38    2.09 
  -4  -9  -5   -5.37    3.10 
  -4  -9  -5   -0.84    2.04 
   4   9   5    2.17    1.87 
   4   9   5   -0.50    1.62 
  -5  -9  -5   29.24    3.95 
  -5  -9  -5   30.55    6.18 
   5   9   5   30.86    3.78 
   5   9   5   15.58    2.94 
  -6  -9  -5    2.28    2.94 
   6   9   5    0.97    1.87 
   6   9   5    2.86    1.92 
  -7  -9  -5   13.55    3.74 
   7   9   5   20.07    3.28 
   7   9   5   24.10    3.60 
   8   9   5   26.55    3.62 
   8   9   5   27.23    3.89 
   9   9   5   -1.32    1.80 
   9   9   5    0.71    2.00 
  10   9   5   19.37    3.94 
  10   9   5   27.74    3.91 
  11   9   5   18.14    4.99 
  11   9   5   12.80    3.43 
  12   9   5   -4.22    1.97 
  12   9   5    2.42    3.62 
   9 -10  -5    2.30    3.67 
  -9  10   5    1.29    3.09 
   8 -10  -5   -0.26    2.89 
  -8  10   5   -0.75    2.49 
   7 -10  -5    1.29    2.98 
  -7  10   5   -1.71    2.44 
   6 -10  -5   15.07    4.83 
  -6  10   5   15.54    3.75 
   5 -10  -5   17.03    4.71 
  -5  10   5   19.40    4.11 
   4 -10  -5    5.33    3.58 
  -4  10   5    8.96    2.45 
  -4  10   5    0.20    2.00 
   3 -10  -5   48.23    5.91 
  -3  10   5   42.43    4.66 
  -3  10   5   58.88    4.58 
   2 -10  -5    1.83    3.58 
  -2  10   5   -1.41    1.86 
  -2  10   5    0.55    1.99 
   1 -10  -5    4.83    3.60 
  -1  10   5    2.19    1.94 
  -1  10   5    1.37    2.12 
   0 -10  -5   56.96    6.33 
   0  10   5   60.87    4.81 
   0  10   5   54.15    4.44 
  -1 -10  -5    9.32    4.32 
   1  10   5   13.49    2.93 
   1  10   5    9.00    2.64 
  -2 -10  -5    0.28    3.44 
   2  10   5    4.44    2.28 
   2  10   5    1.34    1.94 
  -3 -10  -5    9.35    4.28 
   3  10   5   -0.34    1.82 
   3  10   5    2.08    2.04 
  -4 -10  -5   -1.84    3.65 
   4  10   5   -0.06    1.92 
   4  10   5    2.63    2.03 
  -5 -10  -5    6.78    4.36 
  -5 -10  -5   16.57    3.37 
   5  10   5   17.01    3.23 
   5  10   5   14.87    3.25 
  -6 -10  -5    8.85    3.14 
   6  10   5    9.69    3.06 
   6  10   5   13.45    2.87 
  -7 -10  -5   -2.05    2.58 
   7  10   5    0.51    1.94 
   7  10   5   -0.26    1.81 
  -8 -10  -5    1.19    3.60 
   8  10   5   -0.34    2.00 
   8  10   5   -0.62    1.78 
  -9 -10  -5    3.49    4.12 
   9  10   5    1.11    2.14 
   9  10   5    1.36    2.15 
 -10 -10  -5    4.28    4.06 
  10  10   5    0.24    1.99 
 -11 -10  -5   10.26    4.90 
  11  10   5    4.59    3.12 
   8 -11  -5    2.11    3.84 
  -8  11   5    2.68    3.07 
   7 -11  -5    3.41    3.58 
  -7  11   5    2.13    2.96 
   6 -11  -5   -2.36    3.16 
  -6  11   5    0.40    2.31 
   5 -11  -5   15.57    5.10 
  -5  11   5   15.68    3.66 
  -5  11   5   17.43    3.18 
   4 -11  -5    1.44    3.34 
  -4  11   5    9.91    2.67 
  -4  11   5    2.75    2.61 
   3 -11  -5    1.97    3.03 
  -3  11   5   -0.65    1.81 
  -3  11   5   -1.48    1.96 
   2 -11  -5    0.99    3.16 
  -2  11   5    4.62    2.40 
  -2  11   5   -1.15    1.68 
   1 -11  -5    4.45    3.49 
  -1  11   5    0.49    2.00 
  -1  11   5    1.30    1.92 
   0 -11  -5    2.27    3.74 
   0  11   5   11.43    3.15 
   0  11   5   15.64    3.37 
  -1 -11  -5   -0.01    3.47 
   1  11   5    2.76    2.16 
   1  11   5    0.40    1.89 
  -2 -11  -5   -7.21    3.08 
   2  11   5    2.01    2.03 
   2  11   5    1.67    1.94 
  -3 -11  -5   11.31    4.68 
   3  11   5    8.47    2.49 
   3  11   5    9.00    3.05 
  -4 -11  -5    2.97    4.13 
   4  11   5    1.14    1.99 
   4  11   5    2.93    1.95 
  -5 -11  -5   17.48    5.52 
   5  11   5   22.27    3.21 
   5  11   5   17.76    3.71 
  -6 -11  -5   -4.37    3.52 
   6  11   5    1.84    1.96 
   6  11   5    2.41    2.28 
   7  11   5    2.43    2.37 
   7  11   5    3.60    2.21 
  -8 -11  -5   19.81    4.60 
   8  11   5   18.97    3.97 
   8  11   5   21.83    3.40 
  -9 -11  -5    4.61    3.91 
   9  11   5    5.39    2.89 
 -10 -11  -5    2.72    4.09 
  10  11   5    6.75    3.05 
   8 -12  -5    6.09    3.89 
  -8  12   5    1.55    2.99 
   7 -12  -5    9.54    4.90 
  -7  12   5    2.68    3.20 
   6 -12  -5   -3.30    3.31 
  -6  12   5    3.07    2.72 
   5 -12  -5   -0.38    3.54 
  -5  12   5   -0.49    1.96 
  -5  12   5   -2.68    2.37 
   4 -12  -5   65.00    7.43 
  -4  12   5   56.74    5.75 
  -4  12   5   71.81    5.44 
   3 -12  -5   11.55    4.83 
  -3  12   5    6.62    2.61 
  -3  12   5   10.62    3.03 
   2 -12  -5   30.75    5.91 
  -2  12   5   39.13    4.30 
  -2  12   5   26.57    3.74 
   1 -12  -5    6.66    3.78 
  -1  12   5    4.45    2.26 
  -1  12   5    4.12    2.45 
   0 -12  -5    3.68    3.75 
   0  12   5    1.76    2.27 
   0  12   5    2.71    2.26 
  -1 -12  -5   41.13    5.78 
   1  12   5   31.88    4.03 
   1  12   5   33.70    3.86 
  -2 -12  -5    4.48    3.85 
   2  12   5    7.22    2.35 
   2  12   5    6.70    2.58 
  -3 -12  -5   11.20    4.60 
   3  12   5   11.33    2.89 
   3  12   5    8.13    2.93 
  -4 -12  -5    1.92    4.06 
   4  12   5    1.11    1.96 
   4  12   5    3.79    2.35 
  -5 -12  -5   -0.68    3.90 
   5  12   5    5.75    2.84 
   5  12   5    4.19    2.30 
  -6 -12  -5    3.23    4.50 
   6  12   5    6.18    2.38 
   6  12   5    4.63    2.99 
  -7 -12  -5    6.32    5.11 
   7  12   5   -0.34    2.07 
   7  12   5    0.63    1.81 
   8  12   5    0.78    1.96 
   9  12   5   -0.50    2.38 
   7 -13  -5   -2.39    3.05 
   6 -13  -5   21.53    6.20 
  -6  13   5   13.70    4.04 
   5 -13  -5   -0.68    3.28 
  -5  13   5   -0.53    2.25 
  -5  13   5   -2.43    1.95 
   4 -13  -5    5.70    3.82 
  -4  13   5    8.48    3.13 
  -4  13   5    5.92    2.65 
   3 -13  -5   -1.11    3.30 
  -3  13   5    4.07    2.44 
  -3  13   5    0.62    2.69 
   2 -13  -5    1.34    3.83 
  -2  13   5   -0.40    1.92 
  -2  13   5   -2.33    1.65 
   1 -13  -5    0.64    3.25 
  -1  13   5    0.61    2.31 
  -1  13   5    1.49    2.29 
   0 -13  -5   21.26    5.54 
   0  13   5   19.21    3.82 
   0  13   5   24.18    4.17 
  -1 -13  -5    4.92    3.80 
   1  13   5    8.80    2.93 
   1  13   5    7.53    2.63 
  -2 -13  -5    1.08    4.09 
   2  13   5   -0.37    2.20 
   2  13   5   -1.19    1.68 
  -3 -13  -5    4.19    4.47 
   3  13   5   -1.45    1.79 
   3  13   5    1.25    2.45 
  -4 -13  -5    2.60    4.02 
   4  13   5    9.87    2.86 
   4  13   5    6.59    3.14 
  -5 -13  -5   11.62    5.73 
   5  13   5   18.96    4.12 
   5  13   5   16.21    3.32 
  -6 -13  -5    0.29    4.26 
   6  13   5    0.03    1.85 
   6  13   5   -0.95    2.00 
  -7 -13  -5   12.49    5.48 
   7  13   5    7.15    2.95 
  -8 -13  -5   -2.18    4.40 
   8  13   5   -3.12    2.02 
   5 -14  -5   -2.57    3.07 
  -5  14   5    0.59    2.34 
  -5  14   5   -0.01    2.26 
   4 -14  -5    1.54    4.09 
  -4  14   5    1.45    2.32 
  -4  14   5    2.23    2.65 
   3 -14  -5    2.54    4.12 
  -3  14   5    1.19    2.48 
  -3  14   5   -1.73    2.12 
   2 -14  -5    0.47    3.91 
  -2  14   5    0.19    2.18 
  -2  14   5   -1.62    1.90 
   1 -14  -5    7.57    4.40 
  -1  14   5   -4.05    1.89 
  -1  14   5    2.00    2.03 
   0 -14  -5    7.10    4.32 
   0  14   5    2.72    2.22 
   0  14   5    3.35    2.60 
  -1 -14  -5   -2.86    3.48 
   1  14   5   -0.76    2.03 
   1  14   5    1.75    2.16 
  -2 -14  -5    6.36    4.89 
   2  14   5    7.71    3.08 
   2  14   5    8.12    2.57 
  -3 -14  -5   -5.45    3.96 
   3  14   5   -0.25    2.53 
   3  14   5   -0.47    1.81 
  -4 -14  -5    6.59    4.68 
   4  14   5   -0.17    2.00 
   4  14   5   -1.46    2.05 
  -5 -14  -5    6.18    5.25 
   5  14   5    9.76    2.85 
   5  14   5   13.65    3.85 
  -6 -14  -5    4.62    5.12 
   6  14   5    1.32    2.69 
  -7 -14  -5    0.59    4.80 
   7  14   5   -1.02    2.37 
   3 -15  -5    5.58    4.47 
  -3  15   5    5.93    3.07 
  -3  15   5    4.98    3.11 
   2 -15  -5   -5.05    3.33 
  -2  15   5   -1.69    2.14 
  -2  15   5   -0.94    2.09 
   1 -15  -5    4.03    4.19 
  -1  15   5    2.31    2.77 
  -1  15   5    0.64    2.44 
   0 -15  -5    4.16    4.20 
   0  15   5   -1.15    1.90 
   0  15   5    5.98    3.05 
  -1 -15  -5   -6.64    2.94 
   1  15   5    0.54    1.84 
   1  15   5    3.32    2.62 
  -2 -15  -5   -1.58    4.39 
   2  15   5    0.66    2.46 
   2  15   5    0.25    1.78 
  -3 -15  -5   -1.55    4.55 
   3  15   5   -1.56    2.12 
   3  15   5    0.00    2.08 
  -4 -15  -5    6.88    5.21 
   4  15   5   -0.31    2.34 
   4  15   5    1.32    2.16 
  -5 -15  -5   -5.15    3.73 
   1  13  -6   21.46    4.80 
  -1 -13   6   25.23    6.87 
  -1 -13   6   23.85    6.30 
   0  13  -6   -0.03    2.61 
   0 -13   6   -2.16    4.00 
   0 -13   6    3.54    3.96 
  -1  13  -6    2.72    2.84 
   1 -13   6   -5.76    2.83 
   1 -13   6    3.96    3.75 
  -2  13  -6    2.73    2.68 
   2 -13   6    1.84    4.15 
   2 -13   6    1.75    3.49 
  -3  13  -6   -0.57    2.24 
   3 -13   6    4.85    3.52 
   3 -13   6    3.25    4.03 
  -4  13  -6   -0.07    2.48 
  -4  13  -6    7.43    3.11 
   4 -13   6    3.91    3.57 
   4 -13   6    0.03    3.32 
  -5  13  -6    2.74    2.42 
  -5  13  -6    3.19    3.02 
   5 -13   6   -4.01    2.84 
   5 -13   6   -1.26    3.11 
  -6  13  -6    5.56    3.76 
  -6  13  -6    6.24    3.39 
   6 -13   6    3.53    3.49 
   6 -13   6   -3.89    3.01 
  -4 -12   6   -3.19    3.99 
   3  12  -6    0.51    2.23 
  -3 -12   6    3.62    4.45 
   2  12  -6    9.68    3.67 
  -2 -12   6   12.50    5.49 
  -2 -12   6   17.34    5.99 
   1  12  -6    6.22    2.93 
  -1 -12   6   14.81    5.26 
  -1 -12   6   11.13    5.17 
   0  12  -6    7.96    3.38 
   0 -12   6    7.01    4.65 
   0 -12   6    3.05    4.07 
  -1  12  -6    4.41    2.83 
   1 -12   6    6.49    4.41 
   1 -12   6   10.39    4.96 
  -2  12  -6    6.30    3.02 
   2 -12   6    6.33    3.72 
   2 -12   6    3.08    4.21 
  -3  12  -6    3.86    2.41 
  -3  12  -6    2.11    2.77 
   3 -12   6    2.79    3.34 
   3 -12   6    1.86    3.27 
  -4  12  -6    6.11    3.10 
  -4  12  -6    0.59    2.35 
   4 -12   6    1.60    3.45 
   4 -12   6    4.58    3.58 
  -5  12  -6   18.16    4.16 
  -5  12  -6   12.13    3.72 
   5 -12   6   13.32    4.70 
   5 -12   6    6.25    3.68 
  -6  12  -6   13.25    3.73 
  -6  12  -6   11.34    3.78 
   6 -12   6   13.76    4.95 
   6 -12   6    8.76    4.26 
  -7  12  -6   -0.55    2.78 
  -7  12  -6   10.20    3.06 
   7 -12   6    3.41    3.44 
   7 -12   6    5.53    3.50 
  -8  12  -6   -2.99    2.92 
  -8  12  -6    1.26    2.25 
   8 -12   6    5.84    3.24 
   8 -12   6    2.79    3.41 
   5  11  -6    5.70    2.90 
  -5 -11   6    1.18    4.44 
   4  11  -6    7.95    3.85 
  -4 -11   6    4.35    4.15 
   3  11  -6   16.20    4.29 
  -3 -11   6   12.15    5.16 
   2  11  -6   -1.29    1.92 
  -2 -11   6    6.63    4.73 
   1  11  -6    1.49    2.42 
  -1 -11   6   -1.75    3.75 
  -1 -11   6    2.14    4.05 
   0  11  -6   16.73    4.17 
   0 -11   6   26.00    5.88 
   0 -11   6   20.98    5.74 
  -1  11  -6   14.05    3.64 
   1 -11   6    9.83    4.67 
   1 -11   6   15.04    4.88 
  -2  11  -6   15.51    3.76 
  -2  11  -6    8.84    2.59 
   2 -11   6    5.01    3.44 
   2 -11   6    6.88    3.94 
  -3  11  -6   -0.83    2.23 
  -3  11  -6   -0.41    2.21 
   3 -11   6   -3.32    3.05 
   3 -11   6   -4.43    2.67 
  -4  11  -6    3.09    2.42 
  -4  11  -6    4.75    2.81 
   4 -11   6    0.53    3.00 
   4 -11   6   -0.60    3.27 
  -5  11  -6   -2.42    2.12 
  -5  11  -6    6.30    3.07 
   5 -11   6    4.57    3.19 
   5 -11   6    8.37    3.89 
  -6  11  -6    4.10    2.67 
  -6  11  -6    9.25    3.65 
   6 -11   6    1.23    3.13 
   6 -11   6    0.74    3.11 
  -7  11  -6   -2.39    1.99 
  -7  11  -6    0.18    2.93 
   7 -11   6   -4.03    2.61 
   7 -11   6   -4.17    2.55 
  -8  11  -6    1.25    2.36 
  -8  11  -6    4.82    3.41 
   8 -11   6    1.02    2.67 
   8 -11   6    3.15    3.28 
  -9  11  -6   -1.66    3.31 
   9 -11   6    2.84    3.92 
   9 -11   6    2.47    3.46 
   6  10  -6   -2.99    3.05 
   6  10  -6    2.63    2.74 
  -6 -10   6    2.95    4.97 
   5  10  -6    1.70    2.46 
  -5 -10   6    4.93    4.87 
   4  10  -6    7.99    3.23 
  -4 -10   6   -1.97    3.59 
   3  10  -6    2.45    2.87 
  -3 -10   6   10.45    5.18 
   2  10  -6   -0.74    1.96 
  -2 -10   6    0.01    3.78 
   1  10  -6   14.66    3.80 
  -1 -10   6    8.13    4.65 
   0  10  -6   14.39    3.61 
   0 -10   6   28.02    5.70 
   0 -10   6   21.58    5.24 
  -1  10  -6    3.24    2.56 
   1 -10   6    3.01    3.44 
   1 -10   6    1.29    3.44 
  -2  10  -6   24.93    3.40 
  -2  10  -6   11.62    3.27 
   2 -10   6   25.12    5.40 
   2 -10   6   14.80    4.38 
  -3  10  -6    9.70    2.84 
  -3  10  -6   11.95    3.37 
   3 -10   6    6.36    3.59 
   3 -10   6   11.29    3.98 
  -4  10  -6   29.94    4.25 
  -4  10  -6   26.92    4.41 
   4 -10   6   30.25    5.79 
   4 -10   6   36.38    5.06 
  -5  10  -6    3.16    2.77 
  -5  10  -6    2.01    2.21 
   5 -10   6    3.08    2.72 
   5 -10   6   -0.03    2.91 
  -6  10  -6    6.40    2.68 
  -6  10  -6    4.41    3.34 
   6 -10   6    3.77    3.07 
   6 -10   6    1.85    3.08 
  -7  10  -6    3.80    2.52 
  -7  10  -6    8.50    3.94 
   7 -10   6   -0.19    2.32 
   7 -10   6    9.20    3.46 
  -8  10  -6    5.30    2.79 
  -8  10  -6    6.22    3.89 
   8 -10   6    4.27    3.56 
   8 -10   6    9.80    3.57 
  -9  10  -6    0.27    3.48 
   9 -10   6    6.09    3.65 
   9 -10   6   18.65    4.52 
 -10  10  -6   -1.92    3.49 
  10 -10   6    4.78    3.56 
  10 -10   6   -0.32    2.22 
   7   9  -6    2.50    3.42 
   7   9  -6   -1.21    1.78 
  -7  -9   6   -2.14    4.36 
   6   9  -6    8.49    3.34 
   6   9  -6   12.09    4.33 
  -6  -9   6   11.42    5.59 
   5   9  -6   15.30    3.77 
   5   9  -6    4.34    3.41 
  -5  -9   6   16.27    5.92 
   4   9  -6   19.39    4.04 
   4   9  -6   25.54    5.56 
  -4  -9   6   10.77    4.90 
   3   9  -6   22.72    4.19 
  -3  -9   6   15.47    5.12 
   2   9  -6    3.99    2.33 
  -2  -9   6   -2.19    3.23 
   1   9  -6    0.77    1.97 
  -1  -9   6    6.27    3.93 
   0   9  -6   11.02    3.08 
   0  -9   6   12.96    4.52 
   0  -9   6   19.97    5.31 
  -1   9  -6    0.77    1.73 
  -1   9  -6    6.52    2.61 
   1  -9   6    7.29    3.84 
   1  -9   6   -2.29    3.10 
  -2   9  -6    9.36    2.68 
  -2   9  -6   11.54    3.38 
   2  -9   6   11.07    4.84 
   2  -9   6   10.30    3.58 
  -3   9  -6    0.57    2.44 
  -3   9  -6    0.10    2.06 
   3  -9   6   -4.41    2.34 
   3  -9   6   -1.85    2.61 
  -4   9  -6   -0.60    1.87 
  -4   9  -6    1.92    2.64 
   4  -9   6    3.25    3.27 
   4  -9   6   -5.27    1.85 
  -5   9  -6    7.65    3.32 
  -5   9  -6   13.17    3.11 
   5  -9   6   14.59    3.62 
   5  -9   6   10.97    4.06 
  -6   9  -6    5.60    2.30 
  -6   9  -6    7.35    3.27 
   6  -9   6    2.75    3.19 
   6  -9   6    1.49    2.68 
  -7   9  -6    0.90    3.08 
  -7   9  -6    4.25    2.45 
   7  -9   6   -2.19    2.36 
   7  -9   6    2.74    2.71 
  -8   9  -6   -1.30    1.83 
  -8   9  -6   -3.74    2.67 
   8  -9   6    4.65    3.01 
   8  -9   6   -0.39    2.62 
  -9   9  -6    2.22    3.48 
   9  -9   6    5.23    3.44 
   9  -9   6    5.86    2.85 
 -10   9  -6   23.31    5.47 
  10  -9   6   18.84    4.39 
  10  -9   6   25.46    5.78 
 -11   9  -6   -1.65    3.53 
  11  -9   6    2.16    2.61 
  11  -9   6    3.53    3.36 
   8   8  -6    6.98    4.32 
   8   8  -6    3.06    2.88 
  -8  -8   6    3.34    4.99 
   7   8  -6    3.22    2.46 
   7   8  -6   -0.49    3.05 
  -7  -8   6   -2.99    4.25 
   6   8  -6   -1.04    2.00 
   6   8  -6    1.86    2.84 
  -6  -8   6    2.74    4.95 
   5   8  -6   -2.52    2.08 
   5   8  -6   -2.89    2.55 
  -5  -8   6    4.88    4.66 
   4   8  -6    2.83    2.98 
   4   8  -6    7.38    2.69 
  -4  -8   6   16.99    5.62 
   3   8  -6    2.25    2.14 
   3   8  -6    8.97    3.47 
  -3  -8   6    6.77    4.24 
   2   8  -6   -2.35    1.43 
  -2  -8   6   -4.45    2.95 
   1   8  -6    2.90    2.24 
  -1  -8   6   13.13    4.87 
   0   8  -6   17.37    3.59 
   0   8  -6   21.70    2.55 
   0  -8   6   22.02    5.59 
  -1   8  -6   47.10    4.84 
  -1   8  -6   44.13    3.84 
   1  -8   6   46.43    6.23 
   1  -8   6   53.15    6.02 
  -2   8  -6    0.43    2.33 
  -2   8  -6   -3.01    2.00 
   2  -8   6    0.76    3.38 
   2  -8   6   -2.35    2.86 
  -3   8  -6    4.13    2.49 
  -3   8  -6   -2.59    2.52 
   3  -8   6    0.24    3.07 
   3  -8   6    1.78    3.17 
  -4   8  -6    0.00    1.93 
  -4   8  -6   -0.42    2.65 
   4  -8   6    9.46    3.46 
   4  -8   6   -1.68    3.10 
  -5   8  -6    2.83    2.91 
  -5   8  -6    0.09    1.76 
   5  -8   6    1.79    2.56 
   5  -8   6   -0.72    2.70 
  -6   8  -6   39.73    5.14 
  -6   8  -6   48.07    4.36 
   6  -8   6   43.66    4.51 
   6  -8   6   49.25    5.69 
  -7   8  -6    0.70    1.86 
  -7   8  -6    2.18    2.94 
   7  -8   6   -2.18    2.16 
   7  -8   6    0.76    2.22 
  -8   8  -6    3.11    1.98 
  -8   8  -6    5.18    3.32 
   8  -8   6    2.71    2.91 
   8  -8   6   -0.10    2.28 
  -9   8  -6    3.72    1.94 
  -9   8  -6   -0.14    3.28 
   9  -8   6   -0.75    2.32 
   9  -8   6    0.02    2.81 
 -10   8  -6    8.73    4.25 
  10  -8   6    7.49    3.08 
  10  -8   6    3.17    3.45 
 -11   8  -6   -7.11    3.05 
  11  -8   6    0.59    3.00 
  11  -8   6    1.24    2.41 
 -12   8  -6   -2.15    3.73 
  12  -8   6    6.34    3.39 
  12  -8   6    2.32    3.35 
   9   7  -6   -0.33    1.95 
   9   7  -6   -0.06    3.48 
  -9  -7   6   -5.13    4.21 
   8   7  -6    2.54    2.21 
   8   7  -6    3.09    3.65 
  -8  -7   6    2.13    5.16 
   7   7  -6   -2.27    1.18 
   7   7  -6   -1.07    2.51 
  -7  -7   6   -0.62    4.70 
   6   7  -6   -0.56    2.48 
   6   7  -6    2.72    2.28 
  -6  -7   6   -8.58    3.22 
   5   7  -6    7.87    3.34 
   5   7  -6   -0.28    1.91 
  -5  -7   6   10.21    4.84 
   4   7  -6    0.58    1.75 
   4   7  -6    1.22    2.60 
  -4  -7   6   -0.71    4.30 
   3   7  -6    9.73    3.14 
   3   7  -6   18.38    4.35 
  -3  -7   6   16.45    5.66 
   2   7  -6   13.14    3.85 
   2   7  -6   17.45    3.63 
  -2  -7   6   19.50    5.15 
   1   7  -6   -1.06    1.90 
   1   7  -6    0.70    1.10 
  -1  -7   6    4.10    4.14 
   0   7  -6   11.43    2.98 
   0   7  -6   14.50    2.37 
   0  -7   6   10.53    4.65 
  -1   7  -6   36.51    4.32 
  -1   7  -6   50.36    3.73 
   1  -7   6   43.38    5.39 
   1  -7   6   34.84    5.93 
  -2   7  -6    6.42    2.71 
  -2   7  -6    5.53    2.59 
   2  -7   6    8.21    3.96 
   2  -7   6    3.49    2.99 
  -3   7  -6   12.80    3.27 
  -3   7  -6   10.67    2.90 
   3  -7   6   16.66    3.79 
   3  -7   6   18.90    4.78 
  -4   7  -6   42.57    4.27 
  -4   7  -6   47.11    4.99 
   4  -7   6   45.77    5.46 
   4  -7   6   50.59    4.73 
  -5   7  -6   42.29    4.26 
  -5   7  -6   43.32    5.20 
   5  -7   6   48.07    4.64 
   5  -7   6   50.96    5.83 
  -6   7  -6    1.37    3.05 
  -6   7  -6    4.76    2.36 
   6  -7   6    1.23    2.92 
   6  -7   6    4.09    2.75 
  -7   7  -6   13.94    4.13 
  -7   7  -6    7.13    2.33 
   7  -7   6    7.95    2.87 
   7  -7   6    1.94    2.64 
  -8   7  -6    1.73    3.34 
  -8   7  -6    0.35    1.76 
   8  -7   6    1.91    2.84 
   8  -7   6    5.26    2.50 
  -9   7  -6    4.15    3.60 
  -9   7  -6    1.93    1.84 
   9  -7   6    2.66    3.07 
   9  -7   6    5.30    2.76 
 -10   7  -6   26.92    5.79 
  10  -7   6   24.99    4.07 
  10  -7   6   31.13    5.84 
 -11   7  -6    1.72    3.87 
  11  -7   6    9.24    3.41 
  11  -7   6    2.75    3.38 
 -12   7  -6   20.42    5.48 
  12  -7   6   19.75    4.38 
  12  -7   6   39.81    6.23 
   9   6  -6   13.88    4.91 
   9   6  -6   15.02    3.51 
  -9  -6   6    9.52    5.82 
   8   6  -6    6.74    2.62 
   8   6  -6   12.15    4.58 
  -8  -6   6   20.42    6.46 
   7   6  -6    1.33    3.15 
   7   6  -6    1.24    2.10 
  -7  -6   6   -2.71    4.63 
   6   6  -6    9.49    2.88 
   6   6  -6    5.43    3.40 
  -6  -6   6    4.22    3.89 
   5   6  -6    7.41    2.66 
   5   6  -6    2.62    2.55 
  -5  -6   6    1.15    4.06 
   4   6  -6    1.01    2.02 
   4   6  -6   -2.99    1.87 
  -4  -6   6    7.42    4.85 
   3   6  -6    0.27    2.02 
   3   6  -6    2.95    2.69 
  -3  -6   6    4.76    4.66 
   2   6  -6   36.54    3.98 
   2   6  -6   20.51    4.02 
  -2  -6   6   23.64    5.31 
   1   6  -6   37.46    2.36 
   1   6  -6   34.49    4.34 
   1   6  -6   44.55    4.21 
  -1  -6   6   35.42    5.60 
   0   6  -6   18.20    2.51 
   0   6  -6   18.31    3.48 
   0  -6   6   19.01    4.60 
  -1   6  -6   55.10    4.62 
  -1   6  -6   60.18    3.99 
   1  -6   6   45.30    5.68 
  -2   6  -6   -1.63    1.98 
  -2   6  -6    0.87    2.04 
   2  -6   6    4.62    2.73 
   2  -6   6   -0.16    2.95 
  -3   6  -6   40.59    4.38 
  -3   6  -6   40.65    3.97 
   3  -6   6   39.04    4.97 
   3  -6   6   45.05    4.33 
  -4   6  -6   35.26    3.84 
  -4   6  -6   33.65    4.38 
   4  -6   6   43.96    5.08 
   4  -6   6   36.43    3.93 
  -5   6  -6   14.59    3.75 
  -5   6  -6   16.24    3.20 
   5  -6   6   24.29    4.78 
   5  -6   6   23.19    3.60 
  -6   6  -6   43.40    4.02 
  -6   6  -6   34.86    5.30 
   6  -6   6   36.18    5.03 
   6  -6   6   45.01    4.19 
  -7   6  -6   -1.48    1.59 
  -7   6  -6    6.15    3.54 
   7  -6   6    2.16    2.77 
   7  -6   6   -0.08    2.14 
  -8   6  -6   -4.72    2.48 
  -8   6  -6    1.80    1.85 
   8  -6   6    0.14    2.48 
   8  -6   6    1.34    2.25 
  -9   6  -6    0.23    3.15 
  -9   6  -6    0.92    1.59 
   9  -6   6    2.42    2.31 
   9  -6   6   -0.69    2.47 
 -10   6  -6   -0.03    2.76 
  10  -6   6   -1.40    2.10 
  10  -6   6    1.16    3.11 
 -11   6  -6    3.49    3.63 
  11  -6   6    4.58    3.48 
  11  -6   6    8.35    2.99 
 -12   6  -6    1.80    3.72 
  12  -6   6    3.90    3.63 
  12  -6   6    6.08    3.18 
 -13   6  -6    6.66    4.65 
  13  -6   6    5.86    3.16 
  13  -6   6    8.35    4.39 
  10   5  -6   -1.62    3.31 
  10   5  -6    1.14    2.01 
 -10  -5   6    7.71    5.51 
   9   5  -6    9.85    4.14 
   9   5  -6    3.08    2.25 
  -9  -5   6   -1.30    4.43 
   8   5  -6   11.70    3.01 
   8   5  -6   17.01    4.70 
  -8  -5   6   20.23    6.27 
   7   5  -6    9.17    2.78 
   7   5  -6   28.14    5.65 
  -7  -5   6   16.98    5.61 
   6   5  -6    6.52    2.33 
   6   5  -6    7.17    3.43 
  -6  -5   6   -3.42    3.92 
   5   5  -6    5.07    2.91 
   5   5  -6    7.17    2.58 
  -5  -5   6   12.01    4.61 
   4   5  -6   30.42    4.50 
   4   5  -6   33.59    3.98 
  -4  -5   6   25.43    5.94 
   3   5  -6   11.46    3.36 
   3   5  -6   11.33    2.90 
  -3  -5   6    8.06    4.49 
   2   5  -6    9.78    2.82 
   2   5  -6   14.11    3.34 
  -2  -5   6   15.03    4.98 
   1   5  -6   -0.32    1.13 
   1   5  -6   -2.66    1.39 
   1   5  -6   -0.16    1.89 
  -1  -5   6    0.49    3.39 
   0   5  -6   44.62    2.97 
   0   5  -6   43.98    4.05 
   0  -5   6   46.52    5.48 
  -1   5  -6   19.65    2.69 
  -1   5  -6   23.84    3.31 
   1  -5   6   20.80    4.25 
  -2   5  -6   38.70    3.50 
  -2   5  -6   35.39    3.55 
   2  -5   6   37.36    3.81 
   2  -5   6   36.63    4.67 
  -3   5  -6    2.57    1.98 
  -3   5  -6   -3.30    1.36 
   3  -5   6    2.30    2.43 
   3  -5   6    3.09    2.11 
  -4   5  -6   -1.06    1.67 
  -4   5  -6    2.70    2.46 
   4  -5   6   -1.17    1.81 
   4  -5   6   -3.72    2.06 
  -5   5  -6   30.44    4.31 
  -5   5  -6   33.24    3.51 
   5  -5   6   41.95    4.83 
   5  -5   6   38.11    3.30 
  -6   5  -6    5.14    3.36 
  -6   5  -6    2.56    2.09 
   6  -5   6    7.47    3.28 
   6  -5   6    7.44    2.46 
  -7   5  -6   19.84    3.12 
  -7   5  -6   21.91    4.86 
   7  -5   6   13.52    2.99 
   7  -5   6   20.02    4.44 
  -8   5  -6    0.22    1.86 
  -8   5  -6    2.38    3.42 
   8  -5   6   -2.42    1.97 
   8  -5   6    1.57    2.85 
  -9   5  -6    0.43    3.08 
  -9   5  -6   -0.18    1.44 
   9  -5   6    2.38    2.58 
   9  -5   6   -1.12    1.90 
 -10   5  -6    5.50    3.70 
  10  -5   6    6.26    3.36 
  10  -5   6    4.49    2.55 
 -11   5  -6    0.74    2.95 
  11  -5   6   -2.95    2.29 
  11  -5   6   -0.15    2.12 
 -12   5  -6    9.48    4.96 
  12  -5   6    9.05    4.06 
  12  -5   6    5.55    3.09 
 -13   5  -6   -1.75    3.74 
  13  -5   6    3.33    3.68 
  13  -5   6   -0.05    2.54 
  10   4  -6    7.97    4.55 
 -10  -4   6    1.19    4.70 
   9   4  -6   14.76    3.11 
   9   4  -6   16.61    5.01 
  -9  -4   6   11.53    5.66 
   8   4  -6    3.14    2.03 
   8   4  -6   -1.45    2.90 
  -8  -4   6   -0.59    3.89 
   7   4  -6    0.87    1.95 
   7   4  -6    2.06    3.24 
  -7  -4   6    2.36    4.27 
   6   4  -6    0.30    2.64 
   6   4  -6    1.03    1.87 
  -6  -4   6    3.45    4.43 
   5   4  -6    8.22    3.45 
   5   4  -6    0.81    1.99 
  -5  -4   6   -0.59    4.37 
   4   4  -6    0.43    2.23 
   4   4  -6    0.51    2.02 
  -4  -4   6    1.83    3.52 
   3   4  -6    6.91    2.67 
   3   4  -6    4.36    2.03 
  -3  -4   6    9.24    4.27 
   2   4  -6    0.46    1.87 
   2   4  -6    1.97    1.97 
  -2  -4   6    6.25    3.73 
   1   4  -6   13.49    2.74 
   1   4  -6   17.38    3.09 
  -1  -4   6   15.89    3.86 
   0   4  -6    5.75    2.05 
   0   4  -6    1.95    1.62 
   0  -4   6    2.89    2.89 
  -1   4  -6  129.46    6.23 
   1  -4   6  136.69    7.70 
  -2   4  -6   52.06    4.12 
   2  -4   6   63.33    3.77 
   2  -4   6   59.77    5.17 
  -3   4  -6    0.65    1.59 
   3  -4   6    0.74    1.68 
   3  -4   6    2.81    2.44 
  -4   4  -6  152.47    6.57 
   4  -4   6  155.16    7.89 
   4  -4   6  151.58    5.45 
  -5   4  -6    2.08    1.84 
   5  -4   6   -0.54    2.20 
   5  -4   6    3.52    1.68 
  -6   4  -6   23.99    3.20 
  -6   4  -6   28.26    4.59 
   6  -4   6   20.27    2.71 
   6  -4   6   38.73    5.87 
  -7   4  -6    6.25    3.42 
  -7   4  -6    3.77    2.06 
   7  -4   6    6.48    2.35 
   7  -4   6    5.94    2.90 
  -8   4  -6    1.43    3.28 
  -8   4  -6   -1.62    1.69 
   8  -4   6    2.82    2.38 
   8  -4   6    2.59    2.79 
  -9   4  -6   37.87    5.82 
  -9   4  -6   42.44    3.60 
   9  -4   6   45.95    5.46 
   9  -4   6   45.02    4.32 
 -10   4  -6    0.40    2.69 
  10  -4   6   -0.23    2.43 
  10  -4   6   -0.39    2.06 
 -11   4  -6    2.04    3.61 
  11  -4   6   -2.27    2.43 
  11  -4   6    7.30    2.99 
 -12   4  -6    6.88    4.23 
  12  -4   6    1.73    3.17 
  12  -4   6    5.94    3.27 
 -13   4  -6    4.56    3.96 
  13  -4   6   -2.36    3.00 
  13  -4   6    3.57    2.97 
  10   3  -6   30.69    6.99 
 -10  -3   6   15.56    6.41 
   9   3  -6    2.68    1.83 
   9   3  -6    0.25    3.46 
  -9  -3   6   -0.45    4.48 
   8   3  -6   17.86    3.05 
   8   3  -6   27.86    5.81 
  -8  -3   6   20.05    6.32
[truncated: 343,776 more chars]
